# Supplementary material for: Global, regional, and national burdens of pancreatitis in children and adolescents aged 0–24 years from 1992 to 2021: a trend analysisbased on the Global Burden of Disease Study 2021
Source: Research Square preprint supplement (doi:10.21203/rs.3.rs-5446819/v1), 2024-12-18
Supplement: Supplementary file 1 [file 77d05b9697b5ba751755c4b7.xlsx]

## Sheet: Supplementary 3
Norpred model of pancreatitis incidence and DALYs in people aged 0-24 years, globally and regionally, 2040
measure	location	cause	sex	year	ASR	crude_rate	case	age
DALYs (Disability-Adjusted Life Years)	Global	Pancreatitis	Male	2040	6.78195	7.6608	127288	age-standardization
DALYs (Disability-Adjusted Life Years)	Global	Pancreatitis	Female	2040	3.32627	3.67638	57404	age-standardization
DALYs (Disability-Adjusted Life Years)	Global	Pancreatitis	Both	2040	5.10885	5.73045	184691	age-standardization
DALYs (Disability-Adjusted Life Years)	Central Europe	Pancreatitis	Male	2040	8.19598	10.1524	1166	age-standardization
DALYs (Disability-Adjusted Life Years)	Central Europe	Pancreatitis	Female	2040	2.51177	2.94744	320	age-standardization
DALYs (Disability-Adjusted Life Years)	Central Europe	Pancreatitis	Both	2040	5.4308	6.65569	1487	age-standardization
DALYs (Disability-Adjusted Life Years)	Central Asia	Pancreatitis	Male	2040	7.55929	8.32593	1933	age-standardization
DALYs (Disability-Adjusted Life Years)	Central Asia	Pancreatitis	Female	2040	3.98647	4.27491	926	age-standardization
DALYs (Disability-Adjusted Life Years)	Central Asia	Pancreatitis	Both	2040	5.83213	6.37062	2859	age-standardization
DALYs (Disability-Adjusted Life Years)	High-income North America	Pancreatitis	Male	2040	4.3343	4.85159	2845	age-standardization
DALYs (Disability-Adjusted Life Years)	High-income North America	Pancreatitis	Female	2040	2.7158	2.98451	1670	age-standardization
DALYs (Disability-Adjusted Life Years)	High-income North America	Pancreatitis	Both	2040	3.54402	3.94079	4516	age-standardization
DALYs (Disability-Adjusted Life Years)	Western Sub-Saharan Africa	Pancreatitis	Male	2040	10.7809	10.3787	23926	age-standardization
DALYs (Disability-Adjusted Life Years)	Western Sub-Saharan Africa	Pancreatitis	Female	2040	2.44708	2.40291	5366	age-standardization
DALYs (Disability-Adjusted Life Years)	Western Sub-Saharan Africa	Pancreatitis	Both	2040	6.66907	6.45423	29292	age-standardization
DALYs (Disability-Adjusted Life Years)	Oceania	Pancreatitis	Male	2040	7.34401	7.5437	400	age-standardization
DALYs (Disability-Adjusted Life Years)	Oceania	Pancreatitis	Female	2040	7.15311	7.19659	359	age-standardization
DALYs (Disability-Adjusted Life Years)	Oceania	Pancreatitis	Both	2040	7.24268	7.37544	759	age-standardization
DALYs (Disability-Adjusted Life Years)	East Asia	Pancreatitis	Male	2040	1.96811	2.48054	4177	age-standardization
DALYs (Disability-Adjusted Life Years)	East Asia	Pancreatitis	Female	2040	1.05124	1.25514	1817	age-standardization
DALYs (Disability-Adjusted Life Years)	East Asia	Pancreatitis	Both	2040	1.54409	1.91439	5995	age-standardization
DALYs (Disability-Adjusted Life Years)	North Africa and Middle East	Pancreatitis	Male	2040	2.17369	2.0139	4003	age-standardization
DALYs (Disability-Adjusted Life Years)	North Africa and Middle East	Pancreatitis	Female	2040	1.94948	1.80672	3406	age-standardization
DALYs (Disability-Adjusted Life Years)	North Africa and Middle East	Pancreatitis	Both	2040	2.06444	1.91279	7408	age-standardization
DALYs (Disability-Adjusted Life Years)	Western Europe	Pancreatitis	Male	2040	1.62985	1.85415	1057	age-standardization
DALYs (Disability-Adjusted Life Years)	Western Europe	Pancreatitis	Female	2040	1.16933	1.29377	700	age-standardization
DALYs (Disability-Adjusted Life Years)	Western Europe	Pancreatitis	Both	2040	1.4057	1.58128	1757	age-standardization
DALYs (Disability-Adjusted Life Years)	Southern Latin America	Pancreatitis	Male	2040	5.40567	6.10573	759	age-standardization
DALYs (Disability-Adjusted Life Years)	Southern Latin America	Pancreatitis	Female	2040	7.03553	7.93722	951	age-standardization
DALYs (Disability-Adjusted Life Years)	Southern Latin America	Pancreatitis	Both	2040	6.20584	7.00052	1709	age-standardization
DALYs (Disability-Adjusted Life Years)	Andean Latin America	Pancreatitis	Male	2040	12.7435	13.8488	2333	age-standardization
DALYs (Disability-Adjusted Life Years)	Andean Latin America	Pancreatitis	Female	2040	9.84783	10.5879	1717	age-standardization
DALYs (Disability-Adjusted Life Years)	Andean Latin America	Pancreatitis	Both	2040	11.3217	12.2494	4050	age-standardization
DALYs (Disability-Adjusted Life Years)	Eastern Sub-Saharan Africa	Pancreatitis	Male	2040	6.85217	6.96551	12953	age-standardization
DALYs (Disability-Adjusted Life Years)	Eastern Sub-Saharan Africa	Pancreatitis	Female	2040	1.71806	1.75171	3177	age-standardization
DALYs (Disability-Adjusted Life Years)	Eastern Sub-Saharan Africa	Pancreatitis	Both	2040	4.31188	4.39148	16131	age-standardization
DALYs (Disability-Adjusted Life Years)	Central Sub-Saharan Africa	Pancreatitis	Male	2040	7.89174	8.05657	4578	age-standardization
DALYs (Disability-Adjusted Life Years)	Central Sub-Saharan Africa	Pancreatitis	Female	2040	1.60913	1.64405	916	age-standardization
DALYs (Disability-Adjusted Life Years)	Central Sub-Saharan Africa	Pancreatitis	Both	2040	4.77321	4.88185	5494	age-standardization
DALYs (Disability-Adjusted Life Years)	Eastern Europe	Pancreatitis	Male	2040	17.1168	21.8986	5481	age-standardization
DALYs (Disability-Adjusted Life Years)	Eastern Europe	Pancreatitis	Female	2040	9.46345	11.5147	2723	age-standardization
DALYs (Disability-Adjusted Life Years)	Eastern Europe	Pancreatitis	Both	2040	13.3913	16.8539	8204	age-standardization
DALYs (Disability-Adjusted Life Years)	South Asia	Pancreatitis	Male	2040	9.1718	9.65302	41233	age-standardization
DALYs (Disability-Adjusted Life Years)	South Asia	Pancreatitis	Female	2040	5.09287	5.26182	20518	age-standardization
DALYs (Disability-Adjusted Life Years)	South Asia	Pancreatitis	Both	2040	7.22501	7.55741	61751	age-standardization
DALYs (Disability-Adjusted Life Years)	Australasia	Pancreatitis	Male	2040	1.03936	1.1569	64	age-standardization
DALYs (Disability-Adjusted Life Years)	Australasia	Pancreatitis	Female	2040	1.07938	1.16404	61	age-standardization
DALYs (Disability-Adjusted Life Years)	Australasia	Pancreatitis	Both	2040	1.05901	1.16038	125	age-standardization
DALYs (Disability-Adjusted Life Years)	High-income Asia Pacific	Pancreatitis	Male	2040	3.01511	3.31622	575	age-standardization
DALYs (Disability-Adjusted Life Years)	High-income Asia Pacific	Pancreatitis	Female	2040	2.48608	2.59195	427	age-standardization
DALYs (Disability-Adjusted Life Years)	High-income Asia Pacific	Pancreatitis	Both	2040	2.75725	2.96039	1001	age-standardization
DALYs (Disability-Adjusted Life Years)	Central Latin America	Pancreatitis	Male	2040	11.5666	13.1926	7568	age-standardization
DALYs (Disability-Adjusted Life Years)	Central Latin America	Pancreatitis	Female	2040	9.2421	10.3078	5685	age-standardization
DALYs (Disability-Adjusted Life Years)	Central Latin America	Pancreatitis	Both	2040	10.423	11.7786	13253	age-standardization
DALYs (Disability-Adjusted Life Years)	Caribbean	Pancreatitis	Male	2040	5.66931	6.37811	546	age-standardization
DALYs (Disability-Adjusted Life Years)	Caribbean	Pancreatitis	Female	2040	6.94991	7.81455	646	age-standardization
DALYs (Disability-Adjusted Life Years)	Caribbean	Pancreatitis	Both	2040	6.29962	7.08378	1192	age-standardization
DALYs (Disability-Adjusted Life Years)	Southern Sub-Saharan Africa	Pancreatitis	Male	2040	7.65355	8.519	1843	age-standardization
DALYs (Disability-Adjusted Life Years)	Southern Sub-Saharan Africa	Pancreatitis	Female	2040	1.19657	1.31153	279	age-standardization
DALYs (Disability-Adjusted Life Years)	Southern Sub-Saharan Africa	Pancreatitis	Both	2040	4.44506	4.9456	2122	age-standardization
DALYs (Disability-Adjusted Life Years)	Tropical Latin America	Pancreatitis	Male	2040	4.81129	5.83535	2086	age-standardization
DALYs (Disability-Adjusted Life Years)	Tropical Latin America	Pancreatitis	Female	2040	5.29781	6.24329	2138	age-standardization
DALYs (Disability-Adjusted Life Years)	Tropical Latin America	Pancreatitis	Both	2040	5.04801	6.03494	4224	age-standardization
DALYs (Disability-Adjusted Life Years)	Southeast Asia	Pancreatitis	Male	2040	6.94452	7.89136	10534	age-standardization
DALYs (Disability-Adjusted Life Years)	Southeast Asia	Pancreatitis	Female	2040	1.9814	2.20724	2787	age-standardization
DALYs (Disability-Adjusted Life Years)	Southeast Asia	Pancreatitis	Both	2040	4.52755	5.12832	13321	age-standardization
Incidence	Global	Pancreatitis	Male	2040	8.90088	9.58984	159340	age-standardization
Incidence	Global	Pancreatitis	Female	2040	9.25353	9.87731	154227	age-standardization
Incidence	Global	Pancreatitis	Both	2040	9.07188	9.72911	313567	age-standardization
Incidence	Central Europe	Pancreatitis	Male	2040	8.21108	9.41234	1081	age-standardization
Incidence	Central Europe	Pancreatitis	Female	2040	7.53168	8.33573	905	age-standardization
Incidence	Central Europe	Pancreatitis	Both	2040	7.88004	8.88917	1986	age-standardization
Incidence	Central Asia	Pancreatitis	Male	2040	12.3652	13.0725	3035	age-standardization
Incidence	Central Asia	Pancreatitis	Female	2040	10.4657	10.9781	2378	age-standardization
Incidence	Central Asia	Pancreatitis	Both	2040	11.4473	12.0616	5413	age-standardization
Incidence	High-income North America	Pancreatitis	Male	2040	9.82901	10.8184	6344	age-standardization
Incidence	High-income North America	Pancreatitis	Female	2040	13.4783	14.969	8376	age-standardization
Incidence	High-income North America	Pancreatitis	Both	2040	11.6106	12.846	14721	age-standardization
Incidence	Western Sub-Saharan Africa	Pancreatitis	Male	2040	6.49835	6.37662	14700	age-standardization
Incidence	Western Sub-Saharan Africa	Pancreatitis	Female	2040	8.05651	7.93149	17712	age-standardization
Incidence	Western Sub-Saharan Africa	Pancreatitis	Both	2040	7.26591	7.14191	32413	age-standardization
Incidence	Oceania	Pancreatitis	Male	2040	4.59733	4.65824	247	age-standardization
Incidence	Oceania	Pancreatitis	Female	2040	4.78759	4.83113	241	age-standardization
Incidence	Oceania	Pancreatitis	Both	2040	4.68895	4.74205	488	age-standardization
Incidence	East Asia	Pancreatitis	Male	2040	5.06824	5.89879	9933	age-standardization
Incidence	East Asia	Pancreatitis	Female	2040	4.55517	5.0102	7253	age-standardization
Incidence	East Asia	Pancreatitis	Both	2040	4.83083	5.48801	17186	age-standardization
Incidence	North Africa and Middle East	Pancreatitis	Male	2040	7.66052	7.03984	13993	age-standardization
Incidence	North Africa and Middle East	Pancreatitis	Female	2040	6.51996	5.98933	11291	age-standardization
Incidence	North Africa and Middle East	Pancreatitis	Both	2040	7.10502	6.52849	25284	age-standardization
Incidence	Western Europe	Pancreatitis	Male	2040	6.40289	7.06751	4029	age-standardization
Incidence	Western Europe	Pancreatitis	Female	2040	7.99329	8.7459	4732	age-standardization
Incidence	Western Europe	Pancreatitis	Both	2040	7.17719	7.88479	8761	age-standardization
Incidence	Southern Latin America	Pancreatitis	Male	2040	5.91599	6.45164	802	age-standardization
Incidence	Southern Latin America	Pancreatitis	Female	2040	16.8546	18.5118	2218	age-standardization
Incidence	Southern Latin America	Pancreatitis	Both	2040	11.2876	12.3707	3020	age-standardization
Incidence	Andean Latin America	Pancreatitis	Male	2040	8.16014	8.76756	1477	age-standardization
Incidence	Andean Latin America	Pancreatitis	Female	2040	13.1751	14.2385	2309	age-standardization
Incidence	Andean Latin America	Pancreatitis	Both	2040	10.6215	11.4509	3786	age-standardization
Incidence	Eastern Sub-Saharan Africa	Pancreatitis	Male	2040	5.4405	5.51734	10260	age-standardization
Incidence	Eastern Sub-Saharan Africa	Pancreatitis	Female	2040	6.51683	6.61977	12006	age-standardization
Incidence	Eastern Sub-Saharan Africa	Pancreatitis	Both	2040	5.97237	6.06166	22266	age-standardization
Incidence	Central Sub-Saharan Africa	Pancreatitis	Male	2040	5.25409	5.32881	3028	age-standardization
Incidence	Central Sub-Saharan Africa	Pancreatitis	Female	2040	5.88408	5.97854	3331	age-standardization
Incidence	Central Sub-Saharan Africa	Pancreatitis	Both	2040	5.56625	5.64959	6358	age-standardization
Incidence	Eastern Europe	Pancreatitis	Male	2040	24.5419	27.9076	6985	age-standardization
Incidence	Eastern Europe	Pancreatitis	Female	2040	20.3903	22.2597	5264	age-standardization
Incidence	Eastern Europe	Pancreatitis	Both	2040	22.5212	25.1638	12249	age-standardization
Incidence	South Asia	Pancreatitis	Male	2040	14.2019	14.0896	60184	age-standardization
Incidence	South Asia	Pancreatitis	Female	2040	13.6374	13.4441	52424	age-standardization
Incidence	South Asia	Pancreatitis	Both	2040	13.9324	13.7815	112608	age-standardization
Incidence	Australasia	Pancreatitis	Male	2040	5.98377	6.52566	361	age-standardization
Incidence	Australasia	Pancreatitis	Female	2040	10.3833	11.3351	594	age-standardization
Incidence	Australasia	Pancreatitis	Both	2040	8.12287	8.86527	955	age-standardization
Incidence	High-income Asia Pacific	Pancreatitis	Male	2040	12.8736	13.8877	2408	age-standardization
Incidence	High-income Asia Pacific	Pancreatitis	Female	2040	11.8085	12.0978	1993	age-standardization
Incidence	High-income Asia Pacific	Pancreatitis	Both	2040	12.3542	13.0157	4401	age-standardization
Incidence	Central Latin America	Pancreatitis	Male	2040	10.3937	11.3866	6532	age-standardization
Incidence	Central Latin America	Pancreatitis	Female	2040	14.7658	15.3937	8490	age-standardization
Incidence	Central Latin America	Pancreatitis	Both	2040	12.5333	13.3499	15021	age-standardization
Incidence	Caribbean	Pancreatitis	Male	2040	7.12648	7.76821	665	age-standardization
Incidence	Caribbean	Pancreatitis	Female	2040	9.56799	10.2218	845	age-standardization
Incidence	Caribbean	Pancreatitis	Both	2040	8.32502	8.97359	1510	age-standardization
Incidence	Southern Sub-Saharan Africa	Pancreatitis	Male	2040	5.64546	5.93048	1283	age-standardization
Incidence	Southern Sub-Saharan Africa	Pancreatitis	Female	2040	7.0842	7.44613	1584	age-standardization
Incidence	Southern Sub-Saharan Africa	Pancreatitis	Both	2040	6.35924	6.68192	2867	age-standardization
Incidence	Tropical Latin America	Pancreatitis	Male	2040	2.69134	3.05195	1091	age-standardization
Incidence	Tropical Latin America	Pancreatitis	Female	2040	3.36993	3.77576	1293	age-standardization
Incidence	Tropical Latin America	Pancreatitis	Both	2040	3.02319	3.40608	2384	age-standardization
Incidence	Southeast Asia	Pancreatitis	Male	2040	6.04602	6.56839	8768	age-standardization
Incidence	Southeast Asia	Pancreatitis	Female	2040	6.62583	7.05653	8910	age-standardization
Incidence	Southeast Asia	Pancreatitis	Both	2040	6.32701	6.80568	17678	age-standardization
