# Supplementary material for: Global, regional, and national burdens of pancreatitis in children and adolescents aged 0–24 years from 1992 to 2021: a trend analysisbased on the Global Burden of Disease Study 2021
Source: Research Square preprint supplement (doi:10.21203/rs.3.rs-5446819/v1), 2024-12-18
Supplement: Supplementary file 2 [file 8843c90a79f087c2e08e09ae.xlsx]

## Sheet: Supplementary 2
AAPC of pancreatitis incidence and DALYs in 0-24 year olds in 204 countries worldwide from 1992 to 2021
measure	location	sex	cause	joinpoint	Start.Obs	End.Obs	AAPC	AAPC_LCI	AAPC_UCI	Significant_indicator	Test.Statistic	P.Value	AAPC_95CI	age
DALYs (Disability-Adjusted Life Years)	Afghanistan	Both	Pancreatitis	3	1992	2021	0.3983	0.106	0.6914	Yes	2.6723	0.008	0.4 (0.11 to 0.69)	Age-standardized
DALYs (Disability-Adjusted Life Years)	Afghanistan	Female	Pancreatitis	3	1992	2021	0.6401	0.277	1.0046	Yes	3.4597	0.001	0.64 (0.28 to 1)	Age-standardized
DALYs (Disability-Adjusted Life Years)	Afghanistan	Male	Pancreatitis	3	1992	2021	0.0989	-0.1705	0.3691	No	0.719	0.472	0.1 (-0.17 to 0.37)	Age-standardized
DALYs (Disability-Adjusted Life Years)	Albania	Both	Pancreatitis	2	1992	2021	-2.2527	-2.9182	-1.5825	Yes	-6.5361	0	-2.25 (-2.92 to -1.58)	Age-standardized
DALYs (Disability-Adjusted Life Years)	Albania	Female	Pancreatitis	1	1992	2021	-2.633	-3.2652	-1.9967	Yes	-8.0287	0	-2.63 (-3.27 to -2)	Age-standardized
DALYs (Disability-Adjusted Life Years)	Albania	Male	Pancreatitis	2	1992	2021	-2.2493	-2.9874	-1.5056	Yes	-5.8828	0	-2.25 (-2.99 to -1.51)	Age-standardized
DALYs (Disability-Adjusted Life Years)	Algeria	Both	Pancreatitis	5	1992	2021	-0.227	-0.3614	-0.0925	Yes	-3.3053	0.001	-0.23 (-0.36 to -0.09)	Age-standardized
DALYs (Disability-Adjusted Life Years)	Algeria	Female	Pancreatitis	3	1992	2021	-0.2483	-0.3866	-0.1098	Yes	-3.5108	0	-0.25 (-0.39 to -0.11)	Age-standardized
DALYs (Disability-Adjusted Life Years)	Algeria	Male	Pancreatitis	5	1992	2021	-0.1845	-0.3118	-0.057	Yes	-2.836	0.005	-0.18 (-0.31 to -0.06)	Age-standardized
DALYs (Disability-Adjusted Life Years)	American Samoa	Both	Pancreatitis	2	1992	2021	0.9237	0.1024	1.7518	Yes	2.2054	0.027	0.92 (0.1 to 1.75)	Age-standardized
DALYs (Disability-Adjusted Life Years)	American Samoa	Female	Pancreatitis	3	1992	2021	1.3504	0.4965	2.2116	Yes	3.1071	0.002	1.35 (0.5 to 2.21)	Age-standardized
DALYs (Disability-Adjusted Life Years)	American Samoa	Male	Pancreatitis	5	1992	2021	1.091	-1.2493	3.4868	No	0.908	0.364	1.09 (-1.25 to 3.49)	Age-standardized
DALYs (Disability-Adjusted Life Years)	Andorra	Both	Pancreatitis	4	1992	2021	-1.1825	-1.3641	-1.0006	Yes	-12.6752	0	-1.18 (-1.36 to -1)	Age-standardized
DALYs (Disability-Adjusted Life Years)	Andorra	Female	Pancreatitis	3	1992	2021	-1.4062	-1.5129	-1.2994	Yes	-25.6314	0	-1.41 (-1.51 to -1.3)	Age-standardized
DALYs (Disability-Adjusted Life Years)	Andorra	Male	Pancreatitis	4	1992	2021	-1.0254	-1.2281	-0.8223	Yes	-9.8526	0	-1.03 (-1.23 to -0.82)	Age-standardized
DALYs (Disability-Adjusted Life Years)	Angola	Both	Pancreatitis	3	1992	2021	-0.0619	-0.5987	0.4777	No	-0.2254	0.822	-0.06 (-0.6 to 0.48)	Age-standardized
DALYs (Disability-Adjusted Life Years)	Angola	Female	Pancreatitis	4	1992	2021	0.4792	0.0984	0.8615	Yes	2.4676	0.014	0.48 (0.1 to 0.86)	Age-standardized
DALYs (Disability-Adjusted Life Years)	Angola	Male	Pancreatitis	3	1992	2021	-0.0917	-0.7106	0.531	No	-0.2895	0.772	-0.09 (-0.71 to 0.53)	Age-standardized
DALYs (Disability-Adjusted Life Years)	Antigua and Barbuda	Both	Pancreatitis	1	1992	2021	-0.2214	-1.2193	0.7864	No	-0.4323	0.666	-0.22 (-1.22 to 0.79)	Age-standardized
DALYs (Disability-Adjusted Life Years)	Antigua and Barbuda	Female	Pancreatitis	2	1992	2021	-0.702	-1.5251	0.128	No	-1.6587	0.097	-0.7 (-1.53 to 0.13)	Age-standardized
DALYs (Disability-Adjusted Life Years)	Antigua and Barbuda	Male	Pancreatitis	1	1992	2021	-0.2176	-1.544	1.1268	No	-0.319	0.75	-0.22 (-1.54 to 1.13)	Age-standardized
DALYs (Disability-Adjusted Life Years)	Argentina	Both	Pancreatitis	3	1992	2021	-1.2028	-1.7319	-0.6708	Yes	-4.4169	0	-1.2 (-1.73 to -0.67)	Age-standardized
DALYs (Disability-Adjusted Life Years)	Argentina	Female	Pancreatitis	3	1992	2021	-1.2873	-2.1647	-0.4021	Yes	-2.8446	0.004	-1.29 (-2.16 to -0.4)	Age-standardized
DALYs (Disability-Adjusted Life Years)	Argentina	Male	Pancreatitis	2	1992	2021	-1.0708	-1.4756	-0.6644	Yes	-5.1465	0	-1.07 (-1.48 to -0.66)	Age-standardized
DALYs (Disability-Adjusted Life Years)	Armenia	Both	Pancreatitis	4	1992	2021	-0.046	-0.7116	0.6241	No	-0.1349	0.893	-0.05 (-0.71 to 0.62)	Age-standardized
DALYs (Disability-Adjusted Life Years)	Armenia	Female	Pancreatitis	4	1992	2021	-0.3199	-0.8316	0.1945	No	-1.22	0.222	-0.32 (-0.83 to 0.19)	Age-standardized
DALYs (Disability-Adjusted Life Years)	Armenia	Male	Pancreatitis	2	1992	2021	0.0939	-0.329	0.5186	No	0.4345	0.664	0.09 (-0.33 to 0.52)	Age-standardized
DALYs (Disability-Adjusted Life Years)	Australia	Both	Pancreatitis	4	1992	2021	-1.1291	-1.9401	-0.3114	Yes	-2.7021	0.007	-1.13 (-1.94 to -0.31)	Age-standardized
DALYs (Disability-Adjusted Life Years)	Australia	Female	Pancreatitis	2	1992	2021	-1.2548	-1.9262	-0.5788	Yes	-3.6276	0	-1.25 (-1.93 to -0.58)	Age-standardized
DALYs (Disability-Adjusted Life Years)	Australia	Male	Pancreatitis	4	1992	2021	-1.1043	-2.3991	0.2077	No	-1.6514	0.099	-1.1 (-2.4 to 0.21)	Age-standardized
DALYs (Disability-Adjusted Life Years)	Austria	Both	Pancreatitis	2	1992	2021	-1.9179	-2.7317	-1.0973	Yes	-4.5554	0	-1.92 (-2.73 to -1.1)	Age-standardized
DALYs (Disability-Adjusted Life Years)	Austria	Female	Pancreatitis	0	1992	2021	-1.5148	-1.6868	-1.3426	Yes	-17.896	0	-1.51 (-1.69 to -1.34)	Age-standardized
DALYs (Disability-Adjusted Life Years)	Austria	Male	Pancreatitis	4	1992	2021	-2.1275	-2.8323	-1.4176	Yes	-5.832	0	-2.13 (-2.83 to -1.42)	Age-standardized
DALYs (Disability-Adjusted Life Years)	Azerbaijan	Both	Pancreatitis	2	1992	2021	-0.8428	-1.162	-0.5226	Yes	-5.1449	0	-0.84 (-1.16 to -0.52)	Age-standardized
DALYs (Disability-Adjusted Life Years)	Azerbaijan	Female	Pancreatitis	3	1992	2021	-0.7303	-0.8943	-0.566	Yes	-8.6889	0	-0.73 (-0.89 to -0.57)	Age-standardized
DALYs (Disability-Adjusted Life Years)	Azerbaijan	Male	Pancreatitis	3	1992	2021	-1.1505	-1.5988	-0.7003	Yes	-4.9906	0	-1.15 (-1.6 to -0.7)	Age-standardized
DALYs (Disability-Adjusted Life Years)	Bahamas	Both	Pancreatitis	2	1992	2021	-0.05	-0.3976	0.2988	No	-0.2816	0.778	-0.05 (-0.4 to 0.3)	Age-standardized
DALYs (Disability-Adjusted Life Years)	Bahamas	Female	Pancreatitis	5	1992	2021	0.3174	-0.8571	1.5059	No	0.5274	0.598	0.32 (-0.86 to 1.51)	Age-standardized
DALYs (Disability-Adjusted Life Years)	Bahamas	Male	Pancreatitis	1	1992	2021	-0.5436	-1.6445	0.5696	No	-0.9599	0.337	-0.54 (-1.64 to 0.57)	Age-standardized
DALYs (Disability-Adjusted Life Years)	Bahrain	Both	Pancreatitis	5	1992	2021	-0.7914	-1.2408	-0.3401	Yes	-3.4308	0.001	-0.79 (-1.24 to -0.34)	Age-standardized
DALYs (Disability-Adjusted Life Years)	Bahrain	Female	Pancreatitis	5	1992	2021	-0.806	-1.7033	0.0995	No	-1.7454	0.081	-0.81 (-1.7 to 0.1)	Age-standardized
DALYs (Disability-Adjusted Life Years)	Bahrain	Male	Pancreatitis	5	1992	2021	-0.9007	-1.2796	-0.5203	Yes	-4.6284	0	-0.9 (-1.28 to -0.52)	Age-standardized
DALYs (Disability-Adjusted Life Years)	Bangladesh	Both	Pancreatitis	4	1992	2021	-0.4478	-0.8173	-0.0769	Yes	-2.3656	0.018	-0.45 (-0.82 to -0.08)	Age-standardized
DALYs (Disability-Adjusted Life Years)	Bangladesh	Female	Pancreatitis	5	1992	2021	0.4519	-0.0225	0.9286	No	1.8666	0.062	0.45 (-0.02 to 0.93)	Age-standardized
DALYs (Disability-Adjusted Life Years)	Bangladesh	Male	Pancreatitis	4	1992	2021	-0.8335	-1.3049	-0.3598	Yes	-3.4422	0.001	-0.83 (-1.3 to -0.36)	Age-standardized
DALYs (Disability-Adjusted Life Years)	Barbados	Both	Pancreatitis	0	1992	2021	-1.5768	-1.7421	-1.4111	Yes	-19.3607	0	-1.58 (-1.74 to -1.41)	Age-standardized
DALYs (Disability-Adjusted Life Years)	Barbados	Female	Pancreatitis	2	1992	2021	-1.2362	-1.5837	-0.8874	Yes	-6.9159	0	-1.24 (-1.58 to -0.89)	Age-standardized
DALYs (Disability-Adjusted Life Years)	Barbados	Male	Pancreatitis	5	1992	2021	-1.9609	-3.2562	-0.6483	Yes	-2.9184	0.004	-1.96 (-3.26 to -0.65)	Age-standardized
DALYs (Disability-Adjusted Life Years)	Belarus	Both	Pancreatitis	3	1992	2021	-1.36	-1.7425	-0.9759	Yes	-6.9061	0	-1.36 (-1.74 to -0.98)	Age-standardized
DALYs (Disability-Adjusted Life Years)	Belarus	Female	Pancreatitis	5	1992	2021	-1.5872	-2.1293	-1.042	Yes	-5.6767	0	-1.59 (-2.13 to -1.04)	Age-standardized
DALYs (Disability-Adjusted Life Years)	Belarus	Male	Pancreatitis	3	1992	2021	-1.3906	-1.8874	-0.8912	Yes	-5.4338	0	-1.39 (-1.89 to -0.89)	Age-standardized
DALYs (Disability-Adjusted Life Years)	Belgium	Both	Pancreatitis	5	1992	2021	-1.9446	-2.8035	-1.078	Yes	-4.3746	0	-1.94 (-2.8 to -1.08)	Age-standardized
DALYs (Disability-Adjusted Life Years)	Belgium	Female	Pancreatitis	5	1992	2021	-1.387	-2.3309	-0.4341	Yes	-2.8465	0.004	-1.39 (-2.33 to -0.43)	Age-standardized
DALYs (Disability-Adjusted Life Years)	Belgium	Male	Pancreatitis	2	1992	2021	-2.5425	-3.2079	-1.8725	Yes	-7.3676	0	-2.54 (-3.21 to -1.87)	Age-standardized
DALYs (Disability-Adjusted Life Years)	Belize	Both	Pancreatitis	2	1992	2021	-1.1963	-1.974	-0.4125	Yes	-2.9851	0.003	-1.2 (-1.97 to -0.41)	Age-standardized
DALYs (Disability-Adjusted Life Years)	Belize	Female	Pancreatitis	3	1992	2021	-1.7406	-3.628	0.1837	No	-1.7745	0.076	-1.74 (-3.63 to 0.18)	Age-standardized
DALYs (Disability-Adjusted Life Years)	Belize	Male	Pancreatitis	4	1992	2021	-0.7312	-2.0217	0.5764	No	-1.0991	0.272	-0.73 (-2.02 to 0.58)	Age-standardized
DALYs (Disability-Adjusted Life Years)	Benin	Both	Pancreatitis	3	1992	2021	-0.1826	-0.353	-0.012	Yes	-2.0971	0.036	-0.18 (-0.35 to -0.01)	Age-standardized
DALYs (Disability-Adjusted Life Years)	Benin	Female	Pancreatitis	3	1992	2021	0.4647	0.2748	0.655	Yes	4.8024	0	0.46 (0.27 to 0.66)	Age-standardized
DALYs (Disability-Adjusted Life Years)	Benin	Male	Pancreatitis	4	1992	2021	-0.4333	-0.7345	-0.1312	Yes	-2.8094	0.005	-0.43 (-0.73 to -0.13)	Age-standardized
DALYs (Disability-Adjusted Life Years)	Bermuda	Both	Pancreatitis	4	1992	2021	-1.9636	-3.0725	-0.842	Yes	-3.4167	0.001	-1.96 (-3.07 to -0.84)	Age-standardized
DALYs (Disability-Adjusted Life Years)	Bermuda	Female	Pancreatitis	3	1992	2021	-2.4052	-3.5028	-1.2952	Yes	-4.2192	0	-2.41 (-3.5 to -1.3)	Age-standardized
DALYs (Disability-Adjusted Life Years)	Bermuda	Male	Pancreatitis	5	1992	2021	-1.3751	-2.3281	-0.4128	Yes	-2.795	0.005	-1.38 (-2.33 to -0.41)	Age-standardized
DALYs (Disability-Adjusted Life Years)	Bhutan	Both	Pancreatitis	0	1992	2021	-0.929	-1.0073	-0.8507	Yes	-24.2046	0	-0.93 (-1.01 to -0.85)	Age-standardized
DALYs (Disability-Adjusted Life Years)	Bhutan	Female	Pancreatitis	2	1992	2021	-1.2328	-1.5511	-0.9135	Yes	-7.5318	0	-1.23 (-1.55 to -0.91)	Age-standardized
DALYs (Disability-Adjusted Life Years)	Bhutan	Male	Pancreatitis	0	1992	2021	-0.6993	-0.7682	-0.6304	Yes	-20.7158	0	-0.7 (-0.77 to -0.63)	Age-standardized
DALYs (Disability-Adjusted Life Years)	Bolivia (Plurinational State of)	Both	Pancreatitis	4	1992	2021	-1.7227	-1.8576	-1.5876	Yes	-24.7899	0	-1.72 (-1.86 to -1.59)	Age-standardized
DALYs (Disability-Adjusted Life Years)	Bolivia (Plurinational State of)	Female	Pancreatitis	4	1992	2021	-2.0236	-2.2086	-1.8382	Yes	-21.201	0	-2.02 (-2.21 to -1.84)	Age-standardized
DALYs (Disability-Adjusted Life Years)	Bolivia (Plurinational State of)	Male	Pancreatitis	5	1992	2021	-1.3404	-1.4565	-1.2241	Yes	-22.4606	0	-1.34 (-1.46 to -1.22)	Age-standardized
DALYs (Disability-Adjusted Life Years)	Bosnia and Herzegovina	Both	Pancreatitis	3	1992	2021	-1.5175	-2.0942	-0.9375	Yes	-5.1039	0	-1.52 (-2.09 to -0.94)	Age-standardized
DALYs (Disability-Adjusted Life Years)	Bosnia and Herzegovina	Female	Pancreatitis	3	1992	2021	-1.6756	-2.2814	-1.066	Yes	-5.359	0	-1.68 (-2.28 to -1.07)	Age-standardized
DALYs (Disability-Adjusted Life Years)	Bosnia and Herzegovina	Male	Pancreatitis	1	1992	2021	-1.4802	-1.9572	-1.0009	Yes	-6.0225	0	-1.48 (-1.96 to -1)	Age-standardized
DALYs (Disability-Adjusted Life Years)	Botswana	Both	Pancreatitis	5	1992	2021	-1.8028	-2.1748	-1.4294	Yes	-9.3945	0	-1.8 (-2.17 to -1.43)	Age-standardized
DALYs (Disability-Adjusted Life Years)	Botswana	Female	Pancreatitis	5	1992	2021	-0.643	-1.1958	-0.0872	Yes	-2.2664	0.023	-0.64 (-1.2 to -0.09)	Age-standardized
DALYs (Disability-Adjusted Life Years)	Botswana	Male	Pancreatitis	4	1992	2021	-2.1647	-2.4361	-1.8925	Yes	-15.4396	0	-2.16 (-2.44 to -1.89)	Age-standardized
DALYs (Disability-Adjusted Life Years)	Brazil	Both	Pancreatitis	5	1992	2021	-0.0492	-0.6765	0.582	No	-0.1533	0.878	-0.05 (-0.68 to 0.58)	Age-standardized
DALYs (Disability-Adjusted Life Years)	Brazil	Female	Pancreatitis	3	1992	2021	0.6747	-0.4642	1.8267	No	1.1584	0.247	0.67 (-0.46 to 1.83)	Age-standardized
DALYs (Disability-Adjusted Life Years)	Brazil	Male	Pancreatitis	3	1992	2021	-0.7141	-1.3804	-0.0432	Yes	-2.0858	0.037	-0.71 (-1.38 to -0.04)	Age-standardized
DALYs (Disability-Adjusted Life Years)	Brunei Darussalam	Both	Pancreatitis	0	1992	2021	-1.3075	-1.4024	-1.2126	Yes	-28.0404	0	-1.31 (-1.4 to -1.21)	Age-standardized
DALYs (Disability-Adjusted Life Years)	Brunei Darussalam	Female	Pancreatitis	3	1992	2021	-1.5332	-1.8817	-1.1835	Yes	-8.5414	0	-1.53 (-1.88 to -1.18)	Age-standardized
DALYs (Disability-Adjusted Life Years)	Brunei Darussalam	Male	Pancreatitis	1	1992	2021	-1.4582	-1.7053	-1.2105	Yes	-11.4677	0	-1.46 (-1.71 to -1.21)	Age-standardized
DALYs (Disability-Adjusted Life Years)	Bulgaria	Both	Pancreatitis	4	1992	2021	-0.4299	-1.0189	0.1625	No	-1.4234	0.155	-0.43 (-1.02 to 0.16)	Age-standardized
DALYs (Disability-Adjusted Life Years)	Bulgaria	Female	Pancreatitis	1	1992	2021	-1.8255	-2.2588	-1.3902	Yes	-8.162	0	-1.83 (-2.26 to -1.39)	Age-standardized
DALYs (Disability-Adjusted Life Years)	Bulgaria	Male	Pancreatitis	4	1992	2021	0.1931	-0.5817	0.9739	No	0.4871	0.626	0.19 (-0.58 to 0.97)	Age-standardized
DALYs (Disability-Adjusted Life Years)	Burkina Faso	Both	Pancreatitis	3	1992	2021	0.5004	0.2452	0.7562	Yes	3.8477	0	0.5 (0.25 to 0.76)	Age-standardized
DALYs (Disability-Adjusted Life Years)	Burkina Faso	Female	Pancreatitis	4	1992	2021	0.8825	0.5869	1.179	Yes	5.8676	0	0.88 (0.59 to 1.18)	Age-standardized
DALYs (Disability-Adjusted Life Years)	Burkina Faso	Male	Pancreatitis	3	1992	2021	0.4088	0.1969	0.6211	Yes	3.7856	0	0.41 (0.2 to 0.62)	Age-standardized
DALYs (Disability-Adjusted Life Years)	Burundi	Both	Pancreatitis	2	1992	2021	-0.7205	-0.908	-0.5326	Yes	-7.4949	0	-0.72 (-0.91 to -0.53)	Age-standardized
DALYs (Disability-Adjusted Life Years)	Burundi	Female	Pancreatitis	2	1992	2021	-0.2902	-0.4556	-0.1246	Yes	-3.4319	0.001	-0.29 (-0.46 to -0.12)	Age-standardized
DALYs (Disability-Adjusted Life Years)	Burundi	Male	Pancreatitis	2	1992	2021	-0.8732	-1.0569	-0.6891	Yes	-9.2662	0	-0.87 (-1.06 to -0.69)	Age-standardized
DALYs (Disability-Adjusted Life Years)	Cabo Verde	Both	Pancreatitis	5	1992	2021	-0.0942	-0.2264	0.0382	No	-1.3944	0.163	-0.09 (-0.23 to 0.04)	Age-standardized
DALYs (Disability-Adjusted Life Years)	Cabo Verde	Female	Pancreatitis	2	1992	2021	-0.793	-0.8901	-0.6958	Yes	-15.9355	0	-0.79 (-0.89 to -0.7)	Age-standardized
DALYs (Disability-Adjusted Life Years)	Cabo Verde	Male	Pancreatitis	5	1992	2021	-0.047	-0.2003	0.1066	No	-0.5998	0.549	-0.05 (-0.2 to 0.11)	Age-standardized
DALYs (Disability-Adjusted Life Years)	Cambodia	Both	Pancreatitis	2	1992	2021	-0.8277	-0.9835	-0.6717	Yes	-10.3631	0	-0.83 (-0.98 to -0.67)	Age-standardized
DALYs (Disability-Adjusted Life Years)	Cambodia	Female	Pancreatitis	3	1992	2021	-1.4145	-1.6065	-1.2221	Yes	-14.3194	0	-1.41 (-1.61 to -1.22)	Age-standardized
DALYs (Disability-Adjusted Life Years)	Cambodia	Male	Pancreatitis	2	1992	2021	-0.6702	-0.8252	-0.515	Yes	-8.4403	0	-0.67 (-0.83 to -0.52)	Age-standardized
DALYs (Disability-Adjusted Life Years)	Cameroon	Both	Pancreatitis	5	1992	2021	0.1423	-0.0485	0.3334	No	1.4616	0.144	0.14 (-0.05 to 0.33)	Age-standardized
DALYs (Disability-Adjusted Life Years)	Cameroon	Female	Pancreatitis	5	1992	2021	0.2857	0.1209	0.4509	Yes	3.399	0.001	0.29 (0.12 to 0.45)	Age-standardized
DALYs (Disability-Adjusted Life Years)	Cameroon	Male	Pancreatitis	4	1992	2021	-0.0255	-0.2094	0.1587	No	-0.2715	0.786	-0.03 (-0.21 to 0.16)	Age-standardized
DALYs (Disability-Adjusted Life Years)	Canada	Both	Pancreatitis	2	1992	2021	-0.3582	-0.6575	-0.058	Yes	-2.3382	0.019	-0.36 (-0.66 to -0.06)	Age-standardized
DALYs (Disability-Adjusted Life Years)	Canada	Female	Pancreatitis	5	1992	2021	-0.7029	-1.3776	-0.0236	Yes	-2.0279	0.043	-0.7 (-1.38 to -0.02)	Age-standardized
DALYs (Disability-Adjusted Life Years)	Canada	Male	Pancreatitis	3	1992	2021	-0.1696	-0.6858	0.3494	No	-0.6416	0.521	-0.17 (-0.69 to 0.35)	Age-standardized
DALYs (Disability-Adjusted Life Years)	Central African Republic	Both	Pancreatitis	2	1992	2021	-0.2815	-0.7482	0.1874	No	-1.1778	0.239	-0.28 (-0.75 to 0.19)	Age-standardized
DALYs (Disability-Adjusted Life Years)	Central African Republic	Female	Pancreatitis	2	1992	2021	0.6732	0.1403	1.2089	Yes	2.4775	0.013	0.67 (0.14 to 1.21)	Age-standardized
DALYs (Disability-Adjusted Life Years)	Central African Republic	Male	Pancreatitis	2	1992	2021	-0.3797	-0.8344	0.077	No	-1.6301	0.103	-0.38 (-0.83 to 0.08)	Age-standardized
DALYs (Disability-Adjusted Life Years)	Chad	Both	Pancreatitis	3	1992	2021	0.9877	0.6651	1.3114	Yes	6.0202	0	0.99 (0.67 to 1.31)	Age-standardized
DALYs (Disability-Adjusted Life Years)	Chad	Female	Pancreatitis	2	1992	2021	1.0561	0.74	1.3732	Yes	6.5719	0	1.06 (0.74 to 1.37)	Age-standardized
DALYs (Disability-Adjusted Life Years)	Chad	Male	Pancreatitis	3	1992	2021	0.9229	0.6063	1.2406	Yes	5.7297	0	0.92 (0.61 to 1.24)	Age-standardized
DALYs (Disability-Adjusted Life Years)	Chile	Both	Pancreatitis	2	1992	2021	-1.4466	-2.1462	-0.742	Yes	-4.0089	0	-1.45 (-2.15 to -0.74)	Age-standardized
DALYs (Disability-Adjusted Life Years)	Chile	Female	Pancreatitis	1	1992	2021	-1.8958	-2.5623	-1.2246	Yes	-5.5024	0	-1.9 (-2.56 to -1.22)	Age-standardized
DALYs (Disability-Adjusted Life Years)	Chile	Male	Pancreatitis	4	1992	2021	-0.463	-1.6097	0.6971	No	-0.785	0.432	-0.46 (-1.61 to 0.7)	Age-standardized
DALYs (Disability-Adjusted Life Years)	China	Both	Pancreatitis	5	1992	2021	-2.7574	-3.1449	-2.3683	Yes	-13.7241	0	-2.76 (-3.14 to -2.37)	Age-standardized
DALYs (Disability-Adjusted Life Years)	China	Female	Pancreatitis	5	1992	2021	-3.4256	-3.7565	-3.0937	Yes	-19.9086	0	-3.43 (-3.76 to -3.09)	Age-standardized
DALYs (Disability-Adjusted Life Years)	China	Male	Pancreatitis	5	1992	2021	-2.1584	-2.5195	-1.7959	Yes	-11.5656	0	-2.16 (-2.52 to -1.8)	Age-standardized
DALYs (Disability-Adjusted Life Years)	Colombia	Both	Pancreatitis	4	1992	2021	-1.7307	-2.7157	-0.7357	Yes	-3.3967	0.001	-1.73 (-2.72 to -0.74)	Age-standardized
DALYs (Disability-Adjusted Life Years)	Colombia	Female	Pancreatitis	5	1992	2021	-1.7339	-3.2121	-0.2331	Yes	-2.2618	0.024	-1.73 (-3.21 to -0.23)	Age-standardized
DALYs (Disability-Adjusted Life Years)	Colombia	Male	Pancreatitis	5	1992	2021	-1.7071	-3.0455	-0.3504	Yes	-2.4617	0.014	-1.71 (-3.05 to -0.35)	Age-standardized
DALYs (Disability-Adjusted Life Years)	Comoros	Both	Pancreatitis	2	1992	2021	-1.0008	-4.3165	2.4298	No	-0.5787	0.563	-1 (-4.32 to 2.43)	Age-standardized
DALYs (Disability-Adjusted Life Years)	Comoros	Female	Pancreatitis	3	1992	2021	-0.4675	-3.1014	2.238	No	-0.3425	0.732	-0.47 (-3.1 to 2.24)	Age-standardized
DALYs (Disability-Adjusted Life Years)	Comoros	Male	Pancreatitis	2	1992	2021	-1.1222	-4.5544	2.4336	No	-0.6261	0.531	-1.12 (-4.55 to 2.43)	Age-standardized
DALYs (Disability-Adjusted Life Years)	Congo	Both	Pancreatitis	3	1992	2021	0.2613	-0.3062	0.8321	No	0.9011	0.368	0.26 (-0.31 to 0.83)	Age-standardized
DALYs (Disability-Adjusted Life Years)	Congo	Female	Pancreatitis	4	1992	2021	0.9218	0.174	1.6751	Yes	2.4182	0.016	0.92 (0.17 to 1.68)	Age-standardized
DALYs (Disability-Adjusted Life Years)	Congo	Male	Pancreatitis	3	1992	2021	0.1515	-0.4104	0.7167	No	0.5274	0.598	0.15 (-0.41 to 0.72)	Age-standardized
DALYs (Disability-Adjusted Life Years)	Cook Islands	Both	Pancreatitis	5	1992	2021	-1.0358	-1.362	-0.7086	Yes	-6.1811	0	-1.04 (-1.36 to -0.71)	Age-standardized
DALYs (Disability-Adjusted Life Years)	Cook Islands	Female	Pancreatitis	4	1992	2021	-1.2955	-1.7107	-0.8785	Yes	-6.0625	0	-1.3 (-1.71 to -0.88)	Age-standardized
DALYs (Disability-Adjusted Life Years)	Cook Islands	Male	Pancreatitis	4	1992	2021	-0.5923	-0.702	-0.4825	Yes	-10.5471	0	-0.59 (-0.7 to -0.48)	Age-standardized
DALYs (Disability-Adjusted Life Years)	Costa Rica	Both	Pancreatitis	4	1992	2021	-0.0381	-0.8301	0.7601	No	-0.094	0.925	-0.04 (-0.83 to 0.76)	Age-standardized
DALYs (Disability-Adjusted Life Years)	Costa Rica	Female	Pancreatitis	1	1992	2021	-0.4078	-0.7514	-0.0629	Yes	-2.317	0.021	-0.41 (-0.75 to -0.06)	Age-standardized
DALYs (Disability-Adjusted Life Years)	Costa Rica	Male	Pancreatitis	4	1992	2021	0.2104	-1.4634	1.9125	No	0.2445	0.807	0.21 (-1.46 to 1.91)	Age-standardized
DALYs (Disability-Adjusted Life Years)	Coted'Ivoire	Both	Pancreatitis	4	1992	2021	0.2377	-0.2485	0.7262	No	0.9571	0.339	0.24 (-0.25 to 0.73)	Age-standardized
DALYs (Disability-Adjusted Life Years)	Coted'Ivoire	Female	Pancreatitis	5	1992	2021	1.0659	0.6222	1.5115	Yes	4.7235	0	1.07 (0.62 to 1.51)	Age-standardized
DALYs (Disability-Adjusted Life Years)	Coted'Ivoire	Male	Pancreatitis	5	1992	2021	-0.0256	-0.5038	0.455	No	-0.1046	0.917	-0.03 (-0.5 to 0.46)	Age-standardized
DALYs (Disability-Adjusted Life Years)	Croatia	Both	Pancreatitis	3	1992	2021	-2.4989	-3.5989	-1.3862	Yes	-4.3712	0	-2.5 (-3.6 to -1.39)	Age-standardized
DALYs (Disability-Adjusted Life Years)	Croatia	Female	Pancreatitis	3	1992	2021	-3.0879	-4.5493	-1.6041	Yes	-4.0459	0	-3.09 (-4.55 to -1.6)	Age-standardized
DALYs (Disability-Adjusted Life Years)	Croatia	Male	Pancreatitis	3	1992	2021	-2.3154	-3.676	-0.9355	Yes	-3.2734	0.001	-2.32 (-3.68 to -0.94)	Age-standardized
DALYs (Disability-Adjusted Life Years)	Cuba	Both	Pancreatitis	5	1992	2021	-1.2111	-2.4007	-0.0071	Yes	-1.9715	0.049	-1.21 (-2.4 to -0.01)	Age-standardized
DALYs (Disability-Adjusted Life Years)	Cuba	Female	Pancreatitis	3	1992	2021	-1.6337	-2.4022	-0.8591	Yes	-4.1161	0	-1.63 (-2.4 to -0.86)	Age-standardized
DALYs (Disability-Adjusted Life Years)	Cuba	Male	Pancreatitis	4	1992	2021	-0.722	-2.1985	0.7769	No	-0.9478	0.343	-0.72 (-2.2 to 0.78)	Age-standardized
DALYs (Disability-Adjusted Life Years)	Cyprus	Both	Pancreatitis	3	1992	2021	-2.314	-3.3943	-1.2217	Yes	-4.1264	0	-2.31 (-3.39 to -1.22)	Age-standardized
DALYs (Disability-Adjusted Life Years)	Cyprus	Female	Pancreatitis	3	1992	2021	-2.883	-5.2465	-0.4606	Yes	-2.3272	0.02	-2.88 (-5.25 to -0.46)	Age-standardized
DALYs (Disability-Adjusted Life Years)	Cyprus	Male	Pancreatitis	2	1992	2021	-1.98	-2.6292	-1.3264	Yes	-5.8983	0	-1.98 (-2.63 to -1.33)	Age-standardized
DALYs (Disability-Adjusted Life Years)	Czechia	Both	Pancreatitis	4	1992	2021	-2.196	-2.9989	-1.3864	Yes	-5.2793	0	-2.2 (-3 to -1.39)	Age-standardized
DALYs (Disability-Adjusted Life Years)	Czechia	Female	Pancreatitis	4	1992	2021	-2.6197	-4.2724	-0.9385	Yes	-3.0396	0.002	-2.62 (-4.27 to -0.94)	Age-standardized
DALYs (Disability-Adjusted Life Years)	Czechia	Male	Pancreatitis	4	1992	2021	-1.9158	-3.0686	-0.7492	Yes	-3.2067	0.001	-1.92 (-3.07 to -0.75)	Age-standardized
DALYs (Disability-Adjusted Life Years)	Democratic People's Republic of Korea	Both	Pancreatitis	4	1992	2021	-0.9653	-1.0932	-0.8373	Yes	-14.7144	0	-0.97 (-1.09 to -0.84)	Age-standardized
DALYs (Disability-Adjusted Life Years)	Democratic People's Republic of Korea	Female	Pancreatitis	4	1992	2021	-1.1242	-1.297	-0.951	Yes	-12.6637	0	-1.12 (-1.3 to -0.95)	Age-standardized
DALYs (Disability-Adjusted Life Years)	Democratic People's Republic of Korea	Male	Pancreatitis	4	1992	2021	-1.0048	-1.1254	-0.884	Yes	-16.2337	0	-1 (-1.13 to -0.88)	Age-standardized
DALYs (Disability-Adjusted Life Years)	Democratic Republic of the Congo	Both	Pancreatitis	3	1992	2021	-0.3536	-0.6411	-0.0652	Yes	-2.4026	0.016	-0.35 (-0.64 to -0.07)	Age-standardized
DALYs (Disability-Adjusted Life Years)	Democratic Republic of the Congo	Female	Pancreatitis	4	1992	2021	-0.012	-0.2761	0.2529	No	-0.0887	0.929	-0.01 (-0.28 to 0.25)	Age-standardized
DALYs (Disability-Adjusted Life Years)	Democratic Republic of the Congo	Male	Pancreatitis	3	1992	2021	-0.4184	-0.7066	-0.1294	Yes	-2.8357	0.005	-0.42 (-0.71 to -0.13)	Age-standardized
DALYs (Disability-Adjusted Life Years)	Denmark	Both	Pancreatitis	2	1992	2021	-1.9709	-2.5129	-1.4259	Yes	-7.0367	0	-1.97 (-2.51 to -1.43)	Age-standardized
DALYs (Disability-Adjusted Life Years)	Denmark	Female	Pancreatitis	0	1992	2021	-1.8689	-2.06	-1.6774	Yes	-19.8238	0	-1.87 (-2.06 to -1.68)	Age-standardized
DALYs (Disability-Adjusted Life Years)	Denmark	Male	Pancreatitis	4	1992	2021	-1.9322	-2.8592	-0.9964	Yes	-4.0265	0	-1.93 (-2.86 to -1)	Age-standardized
DALYs (Disability-Adjusted Life Years)	Djibouti	Both	Pancreatitis	0	1992	2021	-0.4033	-0.616	-0.1903	Yes	-3.8737	0.001	-0.4 (-0.62 to -0.19)	Age-standardized
DALYs (Disability-Adjusted Life Years)	Djibouti	Female	Pancreatitis	1	1992	2021	0.0195	-0.4321	0.4731	No	0.0843	0.933	0.02 (-0.43 to 0.47)	Age-standardized
DALYs (Disability-Adjusted Life Years)	Djibouti	Male	Pancreatitis	1	1992	2021	-0.386	-0.8528	0.0829	No	-1.6141	0.106	-0.39 (-0.85 to 0.08)	Age-standardized
DALYs (Disability-Adjusted Life Years)	Dominica	Both	Pancreatitis	4	1992	2021	-0.1348	-0.2693	0	Yes	-1.96	0.05	-0.13 (-0.27 to 0)	Age-standardized
DALYs (Disability-Adjusted Life Years)	Dominica	Female	Pancreatitis	5	1992	2021	-0.0776	-0.4192	0.2651	No	-0.4445	0.657	-0.08 (-0.42 to 0.27)	Age-standardized
DALYs (Disability-Adjusted Life Years)	Dominica	Male	Pancreatitis	4	1992	2021	-0.2033	-0.3822	-0.024	Yes	-2.222	0.026	-0.2 (-0.38 to -0.02)	Age-standardized
DALYs (Disability-Adjusted Life Years)	Dominican Republic	Both	Pancreatitis	3	1992	2021	-0.8657	-1.2399	-0.49	Yes	-4.5053	0	-0.87 (-1.24 to -0.49)	Age-standardized
DALYs (Disability-Adjusted Life Years)	Dominican Republic	Female	Pancreatitis	3	1992	2021	-1.2268	-1.4552	-0.9978	Yes	-10.448	0	-1.23 (-1.46 to -1)	Age-standardized
DALYs (Disability-Adjusted Life Years)	Dominican Republic	Male	Pancreatitis	3	1992	2021	-0.5669	-1.1614	0.031	No	-1.8585	0.063	-0.57 (-1.16 to 0.03)	Age-standardized
DALYs (Disability-Adjusted Life Years)	Ecuador	Both	Pancreatitis	5	1992	2021	-3.4067	-4.6818	-2.1145	Yes	-5.1119	0	-3.41 (-4.68 to -2.11)	Age-standardized
DALYs (Disability-Adjusted Life Years)	Ecuador	Female	Pancreatitis	5	1992	2021	-3.7232	-5.395	-2.0218	Yes	-4.2453	0	-3.72 (-5.39 to -2.02)	Age-standardized
DALYs (Disability-Adjusted Life Years)	Ecuador	Male	Pancreatitis	3	1992	2021	-2.8496	-4.1216	-1.5608	Yes	-4.2994	0	-2.85 (-4.12 to -1.56)	Age-standardized
DALYs (Disability-Adjusted Life Years)	Egypt	Both	Pancreatitis	4	1992	2021	-0.4251	-0.5654	-0.2846	Yes	-5.9209	0	-0.43 (-0.57 to -0.28)	Age-standardized
DALYs (Disability-Adjusted Life Years)	Egypt	Female	Pancreatitis	3	1992	2021	-0.7243	-0.875	-0.5734	Yes	-9.3781	0	-0.72 (-0.88 to -0.57)	Age-standardized
DALYs (Disability-Adjusted Life Years)	Egypt	Male	Pancreatitis	4	1992	2021	-0.0859	-0.3269	0.1557	No	-0.6974	0.486	-0.09 (-0.33 to 0.16)	Age-standardized
DALYs (Disability-Adjusted Life Years)	El Salvador	Both	Pancreatitis	4	1992	2021	-1.7766	-2.6996	-0.8449	Yes	-3.7215	0	-1.78 (-2.7 to -0.84)	Age-standardized
DALYs (Disability-Adjusted Life Years)	El Salvador	Female	Pancreatitis	4	1992	2021	-1.5565	-2.3968	-0.709	Yes	-3.5867	0	-1.56 (-2.4 to -0.71)	Age-standardized
DALYs (Disability-Adjusted Life Years)	El Salvador	Male	Pancreatitis	4	1992	2021	-2.0674	-3.0564	-1.0683	Yes	-4.034	0	-2.07 (-3.06 to -1.07)	Age-standardized
DALYs (Disability-Adjusted Life Years)	Equatorial Guinea	Both	Pancreatitis	3	1992	2021	-1.0835	-1.5738	-0.5908	Yes	-4.2971	0	-1.08 (-1.57 to -0.59)	Age-standardized
DALYs (Disability-Adjusted Life Years)	Equatorial Guinea	Female	Pancreatitis	3	1992	2021	-0.7558	-1.1075	-0.4028	Yes	-4.1881	0	-0.76 (-1.11 to -0.4)	Age-standardized
DALYs (Disability-Adjusted Life Years)	Equatorial Guinea	Male	Pancreatitis	5	1992	2021	-1.6555	-2.0924	-1.2167	Yes	-7.3491	0	-1.66 (-2.09 to -1.22)	Age-standardized
DALYs (Disability-Adjusted Life Years)	Eritrea	Both	Pancreatitis	3	1992	2021	-0.1254	-0.2876	0.0371	No	-1.5126	0.13	-0.13 (-0.29 to 0.04)	Age-standardized
DALYs (Disability-Adjusted Life Years)	Eritrea	Female	Pancreatitis	3	1992	2021	0.5687	0.3549	0.783	Yes	5.2219	0	0.57 (0.35 to 0.78)	Age-standardized
DALYs (Disability-Adjusted Life Years)	Eritrea	Male	Pancreatitis	3	1992	2021	-0.3325	-0.4902	-0.1746	Yes	-4.1221	0	-0.33 (-0.49 to -0.17)	Age-standardized
DALYs (Disability-Adjusted Life Years)	Estonia	Both	Pancreatitis	3	1992	2021	-1.037	-2.4064	0.3518	No	-1.4661	0.143	-1.04 (-2.41 to 0.35)	Age-standardized
DALYs (Disability-Adjusted Life Years)	Estonia	Female	Pancreatitis	3	1992	2021	-0.0451	-1.3238	1.2502	No	-0.0687	0.945	-0.05 (-1.32 to 1.25)	Age-standardized
DALYs (Disability-Adjusted Life Years)	Estonia	Male	Pancreatitis	3	1992	2021	-1.5702	-3.0036	-0.1156	Yes	-2.1145	0.034	-1.57 (-3 to -0.12)	Age-standardized
DALYs (Disability-Adjusted Life Years)	Eswatini	Both	Pancreatitis	4	1992	2021	0.447	0.3285	0.5656	Yes	7.4067	0	0.45 (0.33 to 0.57)	Age-standardized
DALYs (Disability-Adjusted Life Years)	Eswatini	Female	Pancreatitis	5	1992	2021	0.0536	-0.1444	0.2521	No	0.5303	0.596	0.05 (-0.14 to 0.25)	Age-standardized
DALYs (Disability-Adjusted Life Years)	Eswatini	Male	Pancreatitis	4	1992	2021	0.3189	0.1865	0.4515	Yes	4.7244	0	0.32 (0.19 to 0.45)	Age-standardized
DALYs (Disability-Adjusted Life Years)	Ethiopia	Both	Pancreatitis	3	1992	2021	-0.21	-0.3432	-0.0767	Yes	-3.086	0.002	-0.21 (-0.34 to -0.08)	Age-standardized
DALYs (Disability-Adjusted Life Years)	Ethiopia	Female	Pancreatitis	3	1992	2021	-0.144	-0.2619	-0.026	Yes	-2.3918	0.017	-0.14 (-0.26 to -0.03)	Age-standardized
DALYs (Disability-Adjusted Life Years)	Ethiopia	Male	Pancreatitis	5	1992	2021	-0.2992	-0.4385	-0.1598	Yes	-4.202	0	-0.3 (-0.44 to -0.16)	Age-standardized
DALYs (Disability-Adjusted Life Years)	Fiji	Both	Pancreatitis	4	1992	2021	-1.3413	-1.878	-0.8017	Yes	-4.852	0	-1.34 (-1.88 to -0.8)	Age-standardized
DALYs (Disability-Adjusted Life Years)	Fiji	Female	Pancreatitis	5	1992	2021	-1.5426	-2.1099	-0.972	Yes	-5.2728	0	-1.54 (-2.11 to -0.97)	Age-standardized
DALYs (Disability-Adjusted Life Years)	Fiji	Male	Pancreatitis	5	1992	2021	-1.3388	-1.7419	-0.934	Yes	-6.452	0	-1.34 (-1.74 to -0.93)	Age-standardized
DALYs (Disability-Adjusted Life Years)	Finland	Both	Pancreatitis	2	1992	2021	-0.8648	-1.3568	-0.3703	Yes	-3.4216	0.001	-0.86 (-1.36 to -0.37)	Age-standardized
DALYs (Disability-Adjusted Life Years)	Finland	Female	Pancreatitis	5	1992	2021	-0.8021	-2.2724	0.6902	No	-1.0571	0.29	-0.8 (-2.27 to 0.69)	Age-standardized
DALYs (Disability-Adjusted Life Years)	Finland	Male	Pancreatitis	2	1992	2021	-0.9461	-1.5961	-0.2918	Yes	-2.83	0.005	-0.95 (-1.6 to -0.29)	Age-standardized
DALYs (Disability-Adjusted Life Years)	France	Both	Pancreatitis	2	1992	2021	-1.598	-2.3159	-0.8748	Yes	-4.3119	0	-1.6 (-2.32 to -0.87)	Age-standardized
DALYs (Disability-Adjusted Life Years)	France	Female	Pancreatitis	0	1992	2021	-1.7598	-1.9147	-1.6046	Yes	-23.0444	0	-1.76 (-1.91 to -1.6)	Age-standardized
DALYs (Disability-Adjusted Life Years)	France	Male	Pancreatitis	3	1992	2021	-1.8978	-2.4695	-1.3227	Yes	-6.4247	0	-1.9 (-2.47 to -1.32)	Age-standardized
DALYs (Disability-Adjusted Life Years)	Gabon	Both	Pancreatitis	1	1992	2021	0.3863	0.0911	0.6823	Yes	2.5664	0.01	0.39 (0.09 to 0.68)	Age-standardized
DALYs (Disability-Adjusted Life Years)	Gabon	Female	Pancreatitis	1	1992	2021	0.1298	-0.0068	0.2665	No	1.8627	0.062	0.13 (-0.01 to 0.27)	Age-standardized
DALYs (Disability-Adjusted Life Years)	Gabon	Male	Pancreatitis	2	1992	2021	0.5419	-0.2092	1.2987	No	1.4126	0.158	0.54 (-0.21 to 1.3)	Age-standardized
DALYs (Disability-Adjusted Life Years)	Gambia	Both	Pancreatitis	3	1992	2021	0.9015	-0.4239	2.2446	No	1.3303	0.183	0.9 (-0.42 to 2.24)	Age-standardized
DALYs (Disability-Adjusted Life Years)	Gambia	Female	Pancreatitis	5	1992	2021	0.9691	-0.3935	2.3503	No	1.3913	0.164	0.97 (-0.39 to 2.35)	Age-standardized
DALYs (Disability-Adjusted Life Years)	Gambia	Male	Pancreatitis	3	1992	2021	0.8707	-0.5283	2.2893	No	1.2166	0.224	0.87 (-0.53 to 2.29)	Age-standardized
DALYs (Disability-Adjusted Life Years)	Georgia	Both	Pancreatitis	3	1992	2021	1.8657	1.3209	2.4135	Yes	6.756	0	1.87 (1.32 to 2.41)	Age-standardized
DALYs (Disability-Adjusted Life Years)	Georgia	Female	Pancreatitis	2	1992	2021	0.9814	0.5668	1.3977	Yes	4.6522	0	0.98 (0.57 to 1.4)	Age-standardized
DALYs (Disability-Adjusted Life Years)	Georgia	Male	Pancreatitis	3	1992	2021	2.2155	1.4769	2.9595	Yes	5.922	0	2.22 (1.48 to 2.96)	Age-standardized
DALYs (Disability-Adjusted Life Years)	Germany	Both	Pancreatitis	4	1992	2021	-1.6845	-2.2394	-1.1265	Yes	-5.8826	0	-1.68 (-2.24 to -1.13)	Age-standardized
DALYs (Disability-Adjusted Life Years)	Germany	Female	Pancreatitis	3	1992	2021	-1.2858	-2.505	-0.0514	Yes	-2.0411	0.041	-1.29 (-2.5 to -0.05)	Age-standardized
DALYs (Disability-Adjusted Life Years)	Germany	Male	Pancreatitis	3	1992	2021	-2.1541	-2.8789	-1.4238	Yes	-5.7401	0	-2.15 (-2.88 to -1.42)	Age-standardized
DALYs (Disability-Adjusted Life Years)	Ghana	Both	Pancreatitis	4	1992	2021	0.1943	-0.0178	0.4069	No	1.7952	0.073	0.19 (-0.02 to 0.41)	Age-standardized
DALYs (Disability-Adjusted Life Years)	Ghana	Female	Pancreatitis	4	1992	2021	-0.3104	-0.5148	-0.1056	Yes	-2.9688	0.003	-0.31 (-0.51 to -0.11)	Age-standardized
DALYs (Disability-Adjusted Life Years)	Ghana	Male	Pancreatitis	4	1992	2021	0.3086	0.0435	0.5745	Yes	2.2823	0.022	0.31 (0.04 to 0.57)	Age-standardized
DALYs (Disability-Adjusted Life Years)	Global	Both	Pancreatitis	1	1992	2021	-0.928	-1.0109	-0.8451	Yes	-21.8292	0	-0.93 (-1.01 to -0.85)	Age-standardized
DALYs (Disability-Adjusted Life Years)	Global	Female	Pancreatitis	4	1992	2021	-1.1453	-1.4945	-0.795	Yes	-6.3811	0	-1.15 (-1.49 to -0.8)	Age-standardized
DALYs (Disability-Adjusted Life Years)	Global	Male	Pancreatitis	1	1992	2021	-0.8213	-0.9281	-0.7145	Yes	-15.0108	0	-0.82 (-0.93 to -0.71)	Age-standardized
DALYs (Disability-Adjusted Life Years)	Greece	Both	Pancreatitis	5	1992	2021	-1.0331	-1.7185	-0.3429	Yes	-2.9287	0.003	-1.03 (-1.72 to -0.34)	Age-standardized
DALYs (Disability-Adjusted Life Years)	Greece	Female	Pancreatitis	5	1992	2021	-1.1369	-2.34	0.081	No	-1.8303	0.067	-1.14 (-2.34 to 0.08)	Age-standardized
DALYs (Disability-Adjusted Life Years)	Greece	Male	Pancreatitis	2	1992	2021	-0.8799	-1.6604	-0.0932	Yes	-2.1911	0.028	-0.88 (-1.66 to -0.09)	Age-standardized
DALYs (Disability-Adjusted Life Years)	Greenland	Both	Pancreatitis	3	1992	2021	-1.5367	-1.8318	-1.2407	Yes	-10.112	0	-1.54 (-1.83 to -1.24)	Age-standardized
DALYs (Disability-Adjusted Life Years)	Greenland	Female	Pancreatitis	3	1992	2021	-1.6402	-1.9726	-1.3068	Yes	-9.577	0	-1.64 (-1.97 to -1.31)	Age-standardized
DALYs (Disability-Adjusted Life Years)	Greenland	Male	Pancreatitis	2	1992	2021	-1.5981	-1.9476	-1.2473	Yes	-8.8731	0	-1.6 (-1.95 to -1.25)	Age-standardized
DALYs (Disability-Adjusted Life Years)	Grenada	Both	Pancreatitis	5	1992	2021	-2.1428	-3.2209	-1.0527	Yes	-3.8323	0	-2.14 (-3.22 to -1.05)	Age-standardized
DALYs (Disability-Adjusted Life Years)	Grenada	Female	Pancreatitis	4	1992	2021	-2.3093	-4.0037	-0.585	Yes	-2.6172	0.009	-2.31 (-4 to -0.58)	Age-standardized
DALYs (Disability-Adjusted Life Years)	Grenada	Male	Pancreatitis	3	1992	2021	-1.8128	-2.7316	-0.8853	Yes	-3.8139	0	-1.81 (-2.73 to -0.89)	Age-standardized
DALYs (Disability-Adjusted Life Years)	Guam	Both	Pancreatitis	4	1992	2021	-1.9713	-3.6936	-0.2181	Yes	-2.2014	0.028	-1.97 (-3.69 to -0.22)	Age-standardized
DALYs (Disability-Adjusted Life Years)	Guam	Female	Pancreatitis	3	1992	2021	-5.5898	-7.825	-3.3003	Yes	-4.7051	0	-5.59 (-7.82 to -3.3)	Age-standardized
DALYs (Disability-Adjusted Life Years)	Guam	Male	Pancreatitis	2	1992	2021	-0.2978	-1.8935	1.3239	No	-0.3623	0.717	-0.3 (-1.89 to 1.32)	Age-standardized
DALYs (Disability-Adjusted Life Years)	Guatemala	Both	Pancreatitis	2	1992	2021	-2.0842	-3.2528	-0.9014	Yes	-3.4381	0.001	-2.08 (-3.25 to -0.9)	Age-standardized
DALYs (Disability-Adjusted Life Years)	Guatemala	Female	Pancreatitis	2	1992	2021	-2.1386	-3.0325	-1.2365	Yes	-4.6174	0	-2.14 (-3.03 to -1.24)	Age-standardized
DALYs (Disability-Adjusted Life Years)	Guatemala	Male	Pancreatitis	4	1992	2021	-1.6676	-3.5871	0.2902	No	-1.6719	0.095	-1.67 (-3.59 to 0.29)	Age-standardized
DALYs (Disability-Adjusted Life Years)	Guinea	Both	Pancreatitis	1	1992	2021	-0.055	-0.1713	0.0614	No	-0.926	0.354	-0.06 (-0.17 to 0.06)	Age-standardized
DALYs (Disability-Adjusted Life Years)	Guinea	Female	Pancreatitis	3	1992	2021	0.5154	0.2939	0.7375	Yes	4.5662	0	0.52 (0.29 to 0.74)	Age-standardized
DALYs (Disability-Adjusted Life Years)	Guinea	Male	Pancreatitis	0	1992	2021	-0.1361	-0.1918	-0.0804	Yes	-5.0058	0	-0.14 (-0.19 to -0.08)	Age-standardized
DALYs (Disability-Adjusted Life Years)	Guinea-Bissau	Both	Pancreatitis	4	1992	2021	0.1129	-0.0907	0.317	No	1.0863	0.277	0.11 (-0.09 to 0.32)	Age-standardized
DALYs (Disability-Adjusted Life Years)	Guinea-Bissau	Female	Pancreatitis	5	1992	2021	0.4413	0.0602	0.8239	Yes	2.2701	0.023	0.44 (0.06 to 0.82)	Age-standardized
DALYs (Disability-Adjusted Life Years)	Guinea-Bissau	Male	Pancreatitis	3	1992	2021	0.0136	-0.1244	0.1518	No	0.1933	0.847	0.01 (-0.12 to 0.15)	Age-standardized
DALYs (Disability-Adjusted Life Years)	Guyana	Both	Pancreatitis	2	1992	2021	3.0074	2.1247	3.8977	Yes	6.7479	0	3.01 (2.12 to 3.9)	Age-standardized
DALYs (Disability-Adjusted Life Years)	Guyana	Female	Pancreatitis	2	1992	2021	3.4206	2.376	4.4758	Yes	6.4937	0	3.42 (2.38 to 4.48)	Age-standardized
DALYs (Disability-Adjusted Life Years)	Guyana	Male	Pancreatitis	3	1992	2021	2.2336	1.1839	3.2942	Yes	4.195	0	2.23 (1.18 to 3.29)	Age-standardized
DALYs (Disability-Adjusted Life Years)	Haiti	Both	Pancreatitis	4	1992	2021	-0.4747	-0.9693	0.0224	No	-1.8718	0.061	-0.47 (-0.97 to 0.02)	Age-standardized
DALYs (Disability-Adjusted Life Years)	Haiti	Female	Pancreatitis	4	1992	2021	-0.4214	-0.8758	0.0352	No	-1.8092	0.07	-0.42 (-0.88 to 0.04)	Age-standardized
DALYs (Disability-Adjusted Life Years)	Haiti	Male	Pancreatitis	2	1992	2021	-0.4557	-1.0203	0.1122	No	-1.5735	0.116	-0.46 (-1.02 to 0.11)	Age-standardized
DALYs (Disability-Adjusted Life Years)	Honduras	Both	Pancreatitis	2	1992	2021	-1.9349	-2.0173	-1.8525	Yes	-45.5691	0	-1.93 (-2.02 to -1.85)	Age-standardized
DALYs (Disability-Adjusted Life Years)	Honduras	Female	Pancreatitis	2	1992	2021	-1.9962	-2.1254	-1.8669	Yes	-29.967	0	-2 (-2.13 to -1.87)	Age-standardized
DALYs (Disability-Adjusted Life Years)	Honduras	Male	Pancreatitis	2	1992	2021	-1.8706	-1.943	-1.7982	Yes	-50.1392	0	-1.87 (-1.94 to -1.8)	Age-standardized
DALYs (Disability-Adjusted Life Years)	Hungary	Both	Pancreatitis	3	1992	2021	-2.0701	-2.8613	-1.2724	Yes	-5.054	0	-2.07 (-2.86 to -1.27)	Age-standardized
DALYs (Disability-Adjusted Life Years)	Hungary	Female	Pancreatitis	3	1992	2021	-1.9279	-2.3203	-1.534	Yes	-9.5174	0	-1.93 (-2.32 to -1.53)	Age-standardized
DALYs (Disability-Adjusted Life Years)	Hungary	Male	Pancreatitis	3	1992	2021	-2.0951	-3.1959	-0.9817	Yes	-3.67	0	-2.1 (-3.2 to -0.98)	Age-standardized
DALYs (Disability-Adjusted Life Years)	Iceland	Both	Pancreatitis	3	1992	2021	-1.6119	-2.2088	-1.0115	Yes	-5.2346	0	-1.61 (-2.21 to -1.01)	Age-standardized
DALYs (Disability-Adjusted Life Years)	Iceland	Female	Pancreatitis	5	1992	2021	-1.3935	-2.7324	-0.0362	Yes	-2.0119	0.044	-1.39 (-2.73 to -0.04)	Age-standardized
DALYs (Disability-Adjusted Life Years)	Iceland	Male	Pancreatitis	2	1992	2021	-1.9064	-2.5535	-1.255	Yes	-5.7	0	-1.91 (-2.55 to -1.25)	Age-standardized
DALYs (Disability-Adjusted Life Years)	India	Both	Pancreatitis	3	1992	2021	-1.7736	-2.4688	-1.0735	Yes	-4.9384	0	-1.77 (-2.47 to -1.07)	Age-standardized
DALYs (Disability-Adjusted Life Years)	India	Female	Pancreatitis	4	1992	2021	-1.6495	-2.4126	-0.8805	Yes	-4.1852	0	-1.65 (-2.41 to -0.88)	Age-standardized
DALYs (Disability-Adjusted Life Years)	India	Male	Pancreatitis	1	1992	2021	-2.0169	-2.3193	-1.7135	Yes	-12.9175	0	-2.02 (-2.32 to -1.71)	Age-standardized
DALYs (Disability-Adjusted Life Years)	Indonesia	Both	Pancreatitis	3	1992	2021	-0.551	-0.6445	-0.4573	Yes	-11.5028	0	-0.55 (-0.64 to -0.46)	Age-standardized
DALYs (Disability-Adjusted Life Years)	Indonesia	Female	Pancreatitis	3	1992	2021	-1.3482	-1.4776	-1.2186	Yes	-20.2622	0	-1.35 (-1.48 to -1.22)	Age-standardized
DALYs (Disability-Adjusted Life Years)	Indonesia	Male	Pancreatitis	3	1992	2021	-0.3706	-0.4552	-0.2858	Yes	-8.5583	0	-0.37 (-0.46 to -0.29)	Age-standardized
DALYs (Disability-Adjusted Life Years)	Iran (Islamic Republic of)	Both	Pancreatitis	5	1992	2021	-0.2459	-0.6059	0.1154	No	-1.335	0.182	-0.25 (-0.61 to 0.12)	Age-standardized
DALYs (Disability-Adjusted Life Years)	Iran (Islamic Republic of)	Female	Pancreatitis	5	1992	2021	-0.4416	-0.8997	0.0185	No	-1.8814	0.06	-0.44 (-0.9 to 0.02)	Age-standardized
DALYs (Disability-Adjusted Life Years)	Iran (Islamic Republic of)	Male	Pancreatitis	3	1992	2021	-0.0416	-0.2491	0.1664	No	-0.3919	0.695	-0.04 (-0.25 to 0.17)	Age-standardized
DALYs (Disability-Adjusted Life Years)	Iraq	Both	Pancreatitis	3	1992	2021	-1.4582	-1.6248	-1.2912	Yes	-17.0088	0	-1.46 (-1.62 to -1.29)	Age-standardized
DALYs (Disability-Adjusted Life Years)	Iraq	Female	Pancreatitis	3	1992	2021	-1.8884	-2.1656	-1.6103	Yes	-13.205	0	-1.89 (-2.17 to -1.61)	Age-standardized
DALYs (Disability-Adjusted Life Years)	Iraq	Male	Pancreatitis	5	1992	2021	-1.0619	-1.1542	-0.9694	Yes	-22.4054	0	-1.06 (-1.15 to -0.97)	Age-standardized
DALYs (Disability-Adjusted Life Years)	Ireland	Both	Pancreatitis	4	1992	2021	-2.2746	-3.2089	-1.3312	Yes	-4.694	0	-2.27 (-3.21 to -1.33)	Age-standardized
DALYs (Disability-Adjusted Life Years)	Ireland	Female	Pancreatitis	2	1992	2021	-1.9758	-2.4852	-1.4638	Yes	-7.5077	0	-1.98 (-2.49 to -1.46)	Age-standardized
DALYs (Disability-Adjusted Life Years)	Ireland	Male	Pancreatitis	2	1992	2021	-2.5795	-3.1605	-1.995	Yes	-8.5627	0	-2.58 (-3.16 to -2)	Age-standardized
DALYs (Disability-Adjusted Life Years)	Israel	Both	Pancreatitis	3	1992	2021	-2.0179	-3.3966	-0.6196	Yes	-2.8196	0.005	-2.02 (-3.4 to -0.62)	Age-standardized
DALYs (Disability-Adjusted Life Years)	Israel	Female	Pancreatitis	4	1992	2021	-2.0055	-3.023	-0.9772	Yes	-3.8038	0	-2.01 (-3.02 to -0.98)	Age-standardized
DALYs (Disability-Adjusted Life Years)	Israel	Male	Pancreatitis	4	1992	2021	-1.9824	-3.8544	-0.074	Yes	-2.0352	0.042	-1.98 (-3.85 to -0.07)	Age-standardized
DALYs (Disability-Adjusted Life Years)	Italy	Both	Pancreatitis	1	1992	2021	-2.7803	-3.0079	-2.5521	Yes	-23.5782	0	-2.78 (-3.01 to -2.55)	Age-standardized
DALYs (Disability-Adjusted Life Years)	Italy	Female	Pancreatitis	1	1992	2021	-2.5912	-2.8515	-2.3302	Yes	-19.2301	0	-2.59 (-2.85 to -2.33)	Age-standardized
DALYs (Disability-Adjusted Life Years)	Italy	Male	Pancreatitis	2	1992	2021	-3.142	-3.5951	-2.6868	Yes	-13.3444	0	-3.14 (-3.6 to -2.69)	Age-standardized
DALYs (Disability-Adjusted Life Years)	Jamaica	Both	Pancreatitis	4	1992	2021	-0.4692	-1.5737	0.6477	No	-0.826	0.409	-0.47 (-1.57 to 0.65)	Age-standardized
DALYs (Disability-Adjusted Life Years)	Jamaica	Female	Pancreatitis	4	1992	2021	-0.4309	-2.6511	1.8399	No	-0.3754	0.707	-0.43 (-2.65 to 1.84)	Age-standardized
DALYs (Disability-Adjusted Life Years)	Jamaica	Male	Pancreatitis	5	1992	2021	-0.6683	-2.3622	1.0549	No	-0.7641	0.445	-0.67 (-2.36 to 1.05)	Age-standardized
DALYs (Disability-Adjusted Life Years)	Japan	Both	Pancreatitis	2	1992	2021	-1.5162	-1.7928	-1.2388	Yes	-10.6453	0	-1.52 (-1.79 to -1.24)	Age-standardized
DALYs (Disability-Adjusted Life Years)	Japan	Female	Pancreatitis	2	1992	2021	-1.6776	-1.8922	-1.4626	Yes	-15.1798	0	-1.68 (-1.89 to -1.46)	Age-standardized
DALYs (Disability-Adjusted Life Years)	Japan	Male	Pancreatitis	2	1992	2021	-1.4941	-1.9725	-1.0134	Yes	-6.0612	0	-1.49 (-1.97 to -1.01)	Age-standardized
DALYs (Disability-Adjusted Life Years)	Jordan	Both	Pancreatitis	3	1992	2021	-1.1914	-1.397	-0.9853	Yes	-11.2767	0	-1.19 (-1.4 to -0.99)	Age-standardized
DALYs (Disability-Adjusted Life Years)	Jordan	Female	Pancreatitis	5	1992	2021	-1.9675	-2.5315	-1.4003	Yes	-6.7503	0	-1.97 (-2.53 to -1.4)	Age-standardized
DALYs (Disability-Adjusted Life Years)	Jordan	Male	Pancreatitis	5	1992	2021	-0.6263	-0.9609	-0.2906	Yes	-3.6509	0	-0.63 (-0.96 to -0.29)	Age-standardized
DALYs (Disability-Adjusted Life Years)	Kazakhstan	Both	Pancreatitis	3	1992	2021	-1.6516	-2.4386	-0.8582	Yes	-4.0625	0	-1.65 (-2.44 to -0.86)	Age-standardized
DALYs (Disability-Adjusted Life Years)	Kazakhstan	Female	Pancreatitis	3	1992	2021	-2.2123	-2.6955	-1.7268	Yes	-8.8523	0	-2.21 (-2.7 to -1.73)	Age-standardized
DALYs (Disability-Adjusted Life Years)	Kazakhstan	Male	Pancreatitis	3	1992	2021	-1.3162	-2.2905	-0.3323	Yes	-2.6174	0.009	-1.32 (-2.29 to -0.33)	Age-standardized
DALYs (Disability-Adjusted Life Years)	Kenya	Both	Pancreatitis	5	1992	2021	0.1975	-0.0046	0.4001	No	1.9156	0.055	0.2 (0 to 0.4)	Age-standardized
DALYs (Disability-Adjusted Life Years)	Kenya	Female	Pancreatitis	2	1992	2021	0.2279	0.1465	0.3093	Yes	5.4921	0	0.23 (0.15 to 0.31)	Age-standardized
DALYs (Disability-Adjusted Life Years)	Kenya	Male	Pancreatitis	5	1992	2021	0.1569	-0.0955	0.4099	No	1.218	0.223	0.16 (-0.1 to 0.41)	Age-standardized
DALYs (Disability-Adjusted Life Years)	Kiribati	Both	Pancreatitis	4	1992	2021	-0.2322	-0.355	-0.1092	Yes	-3.6972	0	-0.23 (-0.36 to -0.11)	Age-standardized
DALYs (Disability-Adjusted Life Years)	Kiribati	Female	Pancreatitis	5	1992	2021	0.1938	-0.1262	0.5149	No	1.1863	0.235	0.19 (-0.13 to 0.51)	Age-standardized
DALYs (Disability-Adjusted Life Years)	Kiribati	Male	Pancreatitis	5	1992	2021	-0.3761	-0.5191	-0.2328	Yes	-5.1397	0	-0.38 (-0.52 to -0.23)	Age-standardized
DALYs (Disability-Adjusted Life Years)	Kuwait	Both	Pancreatitis	5	1992	2021	-0.7388	-2.6119	1.1703	No	-0.7629	0.446	-0.74 (-2.61 to 1.17)	Age-standardized
DALYs (Disability-Adjusted Life Years)	Kuwait	Female	Pancreatitis	3	1992	2021	-1.917	-3.8672	0.0728	No	-1.8889	0.059	-1.92 (-3.87 to 0.07)	Age-standardized
DALYs (Disability-Adjusted Life Years)	Kuwait	Male	Pancreatitis	4	1992	2021	0.152	-2.1613	2.5201	No	0.1274	0.899	0.15 (-2.16 to 2.52)	Age-standardized
DALYs (Disability-Adjusted Life Years)	Kyrgyzstan	Both	Pancreatitis	3	1992	2021	1.1239	0.2088	2.0474	Yes	2.4096	0.016	1.12 (0.21 to 2.05)	Age-standardized
DALYs (Disability-Adjusted Life Years)	Kyrgyzstan	Female	Pancreatitis	4	1992	2021	1.0185	0.1512	1.8933	Yes	2.3034	0.021	1.02 (0.15 to 1.89)	Age-standardized
DALYs (Disability-Adjusted Life Years)	Kyrgyzstan	Male	Pancreatitis	3	1992	2021	1.2757	0.5837	1.9725	Yes	3.6235	0	1.28 (0.58 to 1.97)	Age-standardized
DALYs (Disability-Adjusted Life Years)	Lao People's Democratic Republic	Both	Pancreatitis	1	1992	2021	-0.4407	-0.5312	-0.35	Yes	-9.509	0	-0.44 (-0.53 to -0.35)	Age-standardized
DALYs (Disability-Adjusted Life Years)	Lao People's Democratic Republic	Female	Pancreatitis	3	1992	2021	-0.2496	-0.54	0.0416	No	-1.6801	0.093	-0.25 (-0.54 to 0.04)	Age-standardized
DALYs (Disability-Adjusted Life Years)	Lao People's Democratic Republic	Male	Pancreatitis	2	1992	2021	-0.6366	-0.7628	-0.5103	Yes	-9.8526	0	-0.64 (-0.76 to -0.51)	Age-standardized
DALYs (Disability-Adjusted Life Years)	Latvia	Both	Pancreatitis	5	1992	2021	0.0721	-1.2553	1.4173	No	0.1057	0.916	0.07 (-1.26 to 1.42)	Age-standardized
DALYs (Disability-Adjusted Life Years)	Latvia	Female	Pancreatitis	5	1992	2021	-0.1431	-1.2971	1.0243	No	-0.2415	0.809	-0.14 (-1.3 to 1.02)	Age-standardized
DALYs (Disability-Adjusted Life Years)	Latvia	Male	Pancreatitis	4	1992	2021	-0.0403	-1.8931	1.8476	No	-0.0422	0.966	-0.04 (-1.89 to 1.85)	Age-standardized
DALYs (Disability-Adjusted Life Years)	Lebanon	Both	Pancreatitis	5	1992	2021	-1.3861	-1.5483	-1.2235	Yes	-16.6116	0	-1.39 (-1.55 to -1.22)	Age-standardized
DALYs (Disability-Adjusted Life Years)	Lebanon	Female	Pancreatitis	4	1992	2021	-1.9168	-2.0505	-1.783	Yes	-27.8206	0	-1.92 (-2.05 to -1.78)	Age-standardized
DALYs (Disability-Adjusted Life Years)	Lebanon	Male	Pancreatitis	2	1992	2021	-0.8409	-0.9113	-0.7705	Yes	-23.3194	0	-0.84 (-0.91 to -0.77)	Age-standardized
DALYs (Disability-Adjusted Life Years)	Lesotho	Both	Pancreatitis	3	1992	2021	0.8545	0.6401	1.0695	Yes	7.8343	0	0.85 (0.64 to 1.07)	Age-standardized
DALYs (Disability-Adjusted Life Years)	Lesotho	Female	Pancreatitis	4	1992	2021	1.2074	0.9512	1.4643	Yes	9.2793	0	1.21 (0.95 to 1.46)	Age-standardized
DALYs (Disability-Adjusted Life Years)	Lesotho	Male	Pancreatitis	3	1992	2021	0.5445	0.3262	0.7634	Yes	4.8954	0	0.54 (0.33 to 0.76)	Age-standardized
DALYs (Disability-Adjusted Life Years)	Liberia	Both	Pancreatitis	4	1992	2021	0.4112	-0.1046	0.9296	No	1.5616	0.118	0.41 (-0.1 to 0.93)	Age-standardized
DALYs (Disability-Adjusted Life Years)	Liberia	Female	Pancreatitis	5	1992	2021	0.3465	-0.1502	0.8456	No	1.3662	0.172	0.35 (-0.15 to 0.85)	Age-standardized
DALYs (Disability-Adjusted Life Years)	Liberia	Male	Pancreatitis	2	1992	2021	0.2347	-0.5447	1.0202	No	0.5886	0.556	0.23 (-0.54 to 1.02)	Age-standardized
DALYs (Disability-Adjusted Life Years)	Libya	Both	Pancreatitis	5	1992	2021	0.467	0.1761	0.7589	Yes	3.1488	0.002	0.47 (0.18 to 0.76)	Age-standardized
DALYs (Disability-Adjusted Life Years)	Libya	Female	Pancreatitis	4	1992	2021	0.5206	0.1948	0.8475	Yes	3.1345	0.002	0.52 (0.19 to 0.85)	Age-standardized
DALYs (Disability-Adjusted Life Years)	Libya	Male	Pancreatitis	4	1992	2021	0.3925	0.1095	0.6764	Yes	2.7201	0.007	0.39 (0.11 to 0.68)	Age-standardized
DALYs (Disability-Adjusted Life Years)	Lithuania	Both	Pancreatitis	2	1992	2021	-0.1265	-0.8451	0.5974	No	-0.3435	0.731	-0.13 (-0.85 to 0.6)	Age-standardized
DALYs (Disability-Adjusted Life Years)	Lithuania	Female	Pancreatitis	4	1992	2021	-0.1634	-1.1265	0.809	No	-0.3307	0.741	-0.16 (-1.13 to 0.81)	Age-standardized
DALYs (Disability-Adjusted Life Years)	Lithuania	Male	Pancreatitis	2	1992	2021	-0.187	-1.1244	0.7592	No	-0.3888	0.697	-0.19 (-1.12 to 0.76)	Age-standardized
DALYs (Disability-Adjusted Life Years)	Luxembourg	Both	Pancreatitis	5	1992	2021	-3.4945	-4.1126	-2.8725	Yes	-10.8513	0	-3.49 (-4.11 to -2.87)	Age-standardized
DALYs (Disability-Adjusted Life Years)	Luxembourg	Female	Pancreatitis	4	1992	2021	-2.8905	-5.501	-0.2078	Yes	-2.1096	0.035	-2.89 (-5.5 to -0.21)	Age-standardized
DALYs (Disability-Adjusted Life Years)	Luxembourg	Male	Pancreatitis	5	1992	2021	-3.9124	-5.1471	-2.6615	Yes	-6.0479	0	-3.91 (-5.15 to -2.66)	Age-standardized
DALYs (Disability-Adjusted Life Years)	Madagascar	Both	Pancreatitis	2	1992	2021	0.147	-0.0865	0.381	No	1.2336	0.217	0.15 (-0.09 to 0.38)	Age-standardized
DALYs (Disability-Adjusted Life Years)	Madagascar	Female	Pancreatitis	2	1992	2021	0.7284	0.5222	0.935	Yes	6.9427	0	0.73 (0.52 to 0.94)	Age-standardized
DALYs (Disability-Adjusted Life Years)	Madagascar	Male	Pancreatitis	2	1992	2021	0.0017	-0.2383	0.2422	No	0.0137	0.989	0 (-0.24 to 0.24)	Age-standardized
DALYs (Disability-Adjusted Life Years)	Malawi	Both	Pancreatitis	5	1992	2021	-0.0944	-0.5234	0.3364	No	-0.4303	0.667	-0.09 (-0.52 to 0.34)	Age-standardized
DALYs (Disability-Adjusted Life Years)	Malawi	Female	Pancreatitis	3	1992	2021	-0.003	-0.2544	0.2491	No	-0.0231	0.982	0 (-0.25 to 0.25)	Age-standardized
DALYs (Disability-Adjusted Life Years)	Malawi	Male	Pancreatitis	5	1992	2021	-0.1269	-0.4366	0.1839	No	-0.8009	0.423	-0.13 (-0.44 to 0.18)	Age-standardized
DALYs (Disability-Adjusted Life Years)	Malaysia	Both	Pancreatitis	2	1992	2021	-1.0558	-1.8291	-0.2764	Yes	-2.6514	0.008	-1.06 (-1.83 to -0.28)	Age-standardized
DALYs (Disability-Adjusted Life Years)	Malaysia	Female	Pancreatitis	0	1992	2021	-1.4426	-1.6133	-1.2715	Yes	-17.1647	0	-1.44 (-1.61 to -1.27)	Age-standardized
DALYs (Disability-Adjusted Life Years)	Malaysia	Male	Pancreatitis	2	1992	2021	-1.0174	-1.9273	-0.0992	Yes	-2.1705	0.03	-1.02 (-1.93 to -0.1)	Age-standardized
DALYs (Disability-Adjusted Life Years)	Maldives	Both	Pancreatitis	3	1992	2021	-1.4793	-1.7683	-1.1895	Yes	-9.9455	0	-1.48 (-1.77 to -1.19)	Age-standardized
DALYs (Disability-Adjusted Life Years)	Maldives	Female	Pancreatitis	2	1992	2021	-2.4543	-2.7235	-2.1843	Yes	-17.6191	0	-2.45 (-2.72 to -2.18)	Age-standardized
DALYs (Disability-Adjusted Life Years)	Maldives	Male	Pancreatitis	3	1992	2021	-1.4728	-1.7135	-1.2315	Yes	-11.8882	0	-1.47 (-1.71 to -1.23)	Age-standardized
DALYs (Disability-Adjusted Life Years)	Mali	Both	Pancreatitis	3	1992	2021	0.1173	-0.1384	0.3736	No	0.8985	0.369	0.12 (-0.14 to 0.37)	Age-standardized
DALYs (Disability-Adjusted Life Years)	Mali	Female	Pancreatitis	3	1992	2021	0.6669	0.4238	0.9106	Yes	5.3886	0	0.67 (0.42 to 0.91)	Age-standardized
DALYs (Disability-Adjusted Life Years)	Mali	Male	Pancreatitis	4	1992	2021	-0.0328	-0.2841	0.2191	No	-0.2556	0.798	-0.03 (-0.28 to 0.22)	Age-standardized
DALYs (Disability-Adjusted Life Years)	Malta	Both	Pancreatitis	1	1992	2021	-1.737	-2.4149	-1.0543	Yes	-4.9604	0	-1.74 (-2.41 to -1.05)	Age-standardized
DALYs (Disability-Adjusted Life Years)	Malta	Female	Pancreatitis	0	1992	2021	-1.4697	-1.9719	-0.965	Yes	-5.9358	0	-1.47 (-1.97 to -0.96)	Age-standardized
DALYs (Disability-Adjusted Life Years)	Malta	Male	Pancreatitis	3	1992	2021	-0.7046	-1.9024	0.5079	No	-1.1419	0.253	-0.7 (-1.9 to 0.51)	Age-standardized
DALYs (Disability-Adjusted Life Years)	Marshall Islands	Both	Pancreatitis	2	1992	2021	-1.1596	-1.3811	-0.9375	Yes	-10.1886	0	-1.16 (-1.38 to -0.94)	Age-standardized
DALYs (Disability-Adjusted Life Years)	Marshall Islands	Female	Pancreatitis	4	1992	2021	-0.4047	-0.6744	-0.1342	Yes	-2.9305	0.003	-0.4 (-0.67 to -0.13)	Age-standardized
DALYs (Disability-Adjusted Life Years)	Marshall Islands	Male	Pancreatitis	2	1992	2021	-1.5821	-1.7679	-1.3959	Yes	-16.5395	0	-1.58 (-1.77 to -1.4)	Age-standardized
DALYs (Disability-Adjusted Life Years)	Mauritania	Both	Pancreatitis	3	1992	2021	-0.1505	-0.6193	0.3205	No	-0.6273	0.53	-0.15 (-0.62 to 0.32)	Age-standardized
DALYs (Disability-Adjusted Life Years)	Mauritania	Female	Pancreatitis	2	1992	2021	-0.0182	-0.3779	0.3428	No	-0.0989	0.921	-0.02 (-0.38 to 0.34)	Age-standardized
DALYs (Disability-Adjusted Life Years)	Mauritania	Male	Pancreatitis	3	1992	2021	-0.1672	-0.6307	0.2984	No	-0.705	0.481	-0.17 (-0.63 to 0.3)	Age-standardized
DALYs (Disability-Adjusted Life Years)	Mauritius	Both	Pancreatitis	4	1992	2021	-2.4008	-3.8933	-0.8851	Yes	-3.0907	0.002	-2.4 (-3.89 to -0.89)	Age-standardized
DALYs (Disability-Adjusted Life Years)	Mauritius	Female	Pancreatitis	5	1992	2021	-3.0826	-5.6344	-0.4619	Yes	-2.3	0.021	-3.08 (-5.63 to -0.46)	Age-standardized
DALYs (Disability-Adjusted Life Years)	Mauritius	Male	Pancreatitis	4	1992	2021	-2.2632	-4.0286	-0.4653	Yes	-2.4615	0.014	-2.26 (-4.03 to -0.47)	Age-standardized
DALYs (Disability-Adjusted Life Years)	Mexico	Both	Pancreatitis	5	1992	2021	0.0894	-0.8844	1.0728	No	0.1791	0.858	0.09 (-0.88 to 1.07)	Age-standardized
DALYs (Disability-Adjusted Life Years)	Mexico	Female	Pancreatitis	5	1992	2021	0.2563	-1.2394	1.7747	No	0.3338	0.739	0.26 (-1.24 to 1.77)	Age-standardized
DALYs (Disability-Adjusted Life Years)	Mexico	Male	Pancreatitis	5	1992	2021	0.2676	-0.666	1.2099	No	0.5599	0.576	0.27 (-0.67 to 1.21)	Age-standardized
DALYs (Disability-Adjusted Life Years)	Micronesia (Federated States of)	Both	Pancreatitis	5	1992	2021	-0.8888	-0.9658	-0.8118	Yes	-22.5111	0	-0.89 (-0.97 to -0.81)	Age-standardized
DALYs (Disability-Adjusted Life Years)	Micronesia (Federated States of)	Female	Pancreatitis	3	1992	2021	-1.4552	-1.5788	-1.3315	Yes	-22.9026	0	-1.46 (-1.58 to -1.33)	Age-standardized
DALYs (Disability-Adjusted Life Years)	Micronesia (Federated States of)	Male	Pancreatitis	4	1992	2021	-0.6954	-0.808	-0.5826	Yes	-12.0535	0	-0.7 (-0.81 to -0.58)	Age-standardized
DALYs (Disability-Adjusted Life Years)	Monaco	Both	Pancreatitis	2	1992	2021	-0.5225	-0.6684	-0.3763	Yes	-6.9927	0	-0.52 (-0.67 to -0.38)	Age-standardized
DALYs (Disability-Adjusted Life Years)	Monaco	Female	Pancreatitis	2	1992	2021	-0.558	-0.7014	-0.4144	Yes	-7.6012	0	-0.56 (-0.7 to -0.41)	Age-standardized
DALYs (Disability-Adjusted Life Years)	Monaco	Male	Pancreatitis	3	1992	2021	-0.5031	-0.6308	-0.3752	Yes	-7.6958	0	-0.5 (-0.63 to -0.38)	Age-standardized
DALYs (Disability-Adjusted Life Years)	Mongolia	Both	Pancreatitis	5	1992	2021	-2.3296	-2.816	-1.8408	Yes	-9.254	0	-2.33 (-2.82 to -1.84)	Age-standardized
DALYs (Disability-Adjusted Life Years)	Mongolia	Female	Pancreatitis	4	1992	2021	-3.4008	-3.8135	-2.9864	Yes	-15.8397	0	-3.4 (-3.81 to -2.99)	Age-standardized
DALYs (Disability-Adjusted Life Years)	Mongolia	Male	Pancreatitis	4	1992	2021	-1.6589	-2.1985	-1.1163	Yes	-5.9585	0	-1.66 (-2.2 to -1.12)	Age-standardized
DALYs (Disability-Adjusted Life Years)	Montenegro	Both	Pancreatitis	1	1992	2021	-0.4965	-0.949	-0.042	Yes	-2.1406	0.032	-0.5 (-0.95 to -0.04)	Age-standardized
DALYs (Disability-Adjusted Life Years)	Montenegro	Female	Pancreatitis	5	1992	2021	-1.3696	-3.2094	0.5051	No	-1.4355	0.151	-1.37 (-3.21 to 0.51)	Age-standardized
DALYs (Disability-Adjusted Life Years)	Montenegro	Male	Pancreatitis	1	1992	2021	-0.2693	-0.8371	0.3017	No	-0.9259	0.354	-0.27 (-0.84 to 0.3)	Age-standardized
DALYs (Disability-Adjusted Life Years)	Morocco	Both	Pancreatitis	3	1992	2021	-0.2029	-0.3876	-0.0178	Yes	-2.1488	0.032	-0.2 (-0.39 to -0.02)	Age-standardized
DALYs (Disability-Adjusted Life Years)	Morocco	Female	Pancreatitis	3	1992	2021	-0.5239	-0.7898	-0.2573	Yes	-3.8466	0	-0.52 (-0.79 to -0.26)	Age-standardized
DALYs (Disability-Adjusted Life Years)	Morocco	Male	Pancreatitis	5	1992	2021	0.1584	-0.0016	0.3187	No	1.9399	0.052	0.16 (0 to 0.32)	Age-standardized
DALYs (Disability-Adjusted Life Years)	Mozambique	Both	Pancreatitis	3	1992	2021	1.1274	0.9913	1.2637	Yes	16.3141	0	1.13 (0.99 to 1.26)	Age-standardized
DALYs (Disability-Adjusted Life Years)	Mozambique	Female	Pancreatitis	5	1992	2021	0.7058	0.4416	0.9708	Yes	5.2476	0	0.71 (0.44 to 0.97)	Age-standardized
DALYs (Disability-Adjusted Life Years)	Mozambique	Male	Pancreatitis	4	1992	2021	1.0289	0.896	1.162	Yes	15.2399	0	1.03 (0.9 to 1.16)	Age-standardized
DALYs (Disability-Adjusted Life Years)	Myanmar	Both	Pancreatitis	5	1992	2021	-0.8998	-1.1215	-0.6776	Yes	-7.9114	0	-0.9 (-1.12 to -0.68)	Age-standardized
DALYs (Disability-Adjusted Life Years)	Myanmar	Female	Pancreatitis	5	1992	2021	-2.1597	-2.4206	-1.8981	Yes	-16.0261	0	-2.16 (-2.42 to -1.9)	Age-standardized
DALYs (Disability-Adjusted Life Years)	Myanmar	Male	Pancreatitis	5	1992	2021	-0.6448	-0.8617	-0.4275	Yes	-5.8029	0	-0.64 (-0.86 to -0.43)	Age-standardized
DALYs (Disability-Adjusted Life Years)	Namibia	Both	Pancreatitis	2	1992	2021	-0.3917	-0.4964	-0.2869	Yes	-7.3171	0	-0.39 (-0.5 to -0.29)	Age-standardized
DALYs (Disability-Adjusted Life Years)	Namibia	Female	Pancreatitis	2	1992	2021	-0.4697	-0.7591	-0.1795	Yes	-3.1694	0.002	-0.47 (-0.76 to -0.18)	Age-standardized
DALYs (Disability-Adjusted Life Years)	Namibia	Male	Pancreatitis	3	1992	2021	-0.4819	-0.6552	-0.3083	Yes	-5.4319	0	-0.48 (-0.66 to -0.31)	Age-standardized
DALYs (Disability-Adjusted Life Years)	Nauru	Both	Pancreatitis	5	1992	2021	-0.5944	-0.7307	-0.4578	Yes	-8.5118	0	-0.59 (-0.73 to -0.46)	Age-standardized
DALYs (Disability-Adjusted Life Years)	Nauru	Female	Pancreatitis	5	1992	2021	-0.5322	-0.7393	-0.3247	Yes	-5.0184	0	-0.53 (-0.74 to -0.32)	Age-standardized
DALYs (Disability-Adjusted Life Years)	Nauru	Male	Pancreatitis	2	1992	2021	-0.6107	-0.6768	-0.5447	Yes	-18.0646	0	-0.61 (-0.68 to -0.54)	Age-standardized
DALYs (Disability-Adjusted Life Years)	Nepal	Both	Pancreatitis	5	1992	2021	-1.4439	-1.5687	-1.3189	Yes	-22.4953	0	-1.44 (-1.57 to -1.32)	Age-standardized
DALYs (Disability-Adjusted Life Years)	Nepal	Female	Pancreatitis	5	1992	2021	-1.8921	-2.2711	-1.5115	Yes	-9.6711	0	-1.89 (-2.27 to -1.51)	Age-standardized
DALYs (Disability-Adjusted Life Years)	Nepal	Male	Pancreatitis	4	1992	2021	-1.2213	-1.3179	-1.1245	Yes	-24.5977	0	-1.22 (-1.32 to -1.12)	Age-standardized
DALYs (Disability-Adjusted Life Years)	Netherlands	Both	Pancreatitis	2	1992	2021	-1.7981	-2.2586	-1.3355	Yes	-7.567	0	-1.8 (-2.26 to -1.34)	Age-standardized
DALYs (Disability-Adjusted Life Years)	Netherlands	Female	Pancreatitis	2	1992	2021	-1.6619	-2.3542	-0.9647	Yes	-4.6494	0	-1.66 (-2.35 to -0.96)	Age-standardized
DALYs (Disability-Adjusted Life Years)	Netherlands	Male	Pancreatitis	5	1992	2021	-1.9988	-3.8895	-0.071	Yes	-2.0314	0.042	-2 (-3.89 to -0.07)	Age-standardized
DALYs (Disability-Adjusted Life Years)	New Zealand	Both	Pancreatitis	2	1992	2021	-1.0456	-2.4239	0.3522	No	-1.4687	0.142	-1.05 (-2.42 to 0.35)	Age-standardized
DALYs (Disability-Adjusted Life Years)	New Zealand	Female	Pancreatitis	1	1992	2021	-1.3946	-1.9403	-0.846	Yes	-4.9606	0	-1.39 (-1.94 to -0.85)	Age-standardized
DALYs (Disability-Adjusted Life Years)	New Zealand	Male	Pancreatitis	3	1992	2021	-1.1	-2.7912	0.6205	No	-1.257	0.209	-1.1 (-2.79 to 0.62)	Age-standardized
DALYs (Disability-Adjusted Life Years)	Nicaragua	Both	Pancreatitis	4	1992	2021	-1.7663	-2.1551	-1.3759	Yes	-8.8065	0	-1.77 (-2.16 to -1.38)	Age-standardized
DALYs (Disability-Adjusted Life Years)	Nicaragua	Female	Pancreatitis	4	1992	2021	-1.7658	-2.1323	-1.3978	Yes	-9.34	0	-1.77 (-2.13 to -1.4)	Age-standardized
DALYs (Disability-Adjusted Life Years)	Nicaragua	Male	Pancreatitis	2	1992	2021	-1.9225	-2.2578	-1.5861	Yes	-11.1122	0	-1.92 (-2.26 to -1.59)	Age-standardized
DALYs (Disability-Adjusted Life Years)	Niger	Both	Pancreatitis	3	1992	2021	0.2455	-0.0409	0.5327	No	1.6796	0.093	0.25 (-0.04 to 0.53)	Age-standardized
DALYs (Disability-Adjusted Life Years)	Niger	Female	Pancreatitis	4	1992	2021	0.555	0.1814	0.9299	Yes	2.9145	0.004	0.56 (0.18 to 0.93)	Age-standardized
DALYs (Disability-Adjusted Life Years)	Niger	Male	Pancreatitis	3	1992	2021	0.0834	-0.175	0.3425	No	0.6321	0.527	0.08 (-0.17 to 0.34)	Age-standardized
DALYs (Disability-Adjusted Life Years)	Nigeria	Both	Pancreatitis	3	1992	2021	0.4615	0.3384	0.5846	Yes	7.3638	0	0.46 (0.34 to 0.58)	Age-standardized
DALYs (Disability-Adjusted Life Years)	Nigeria	Female	Pancreatitis	3	1992	2021	0.4729	0.3556	0.5904	Yes	7.9151	0	0.47 (0.36 to 0.59)	Age-standardized
DALYs (Disability-Adjusted Life Years)	Nigeria	Male	Pancreatitis	4	1992	2021	0.44	0.2421	0.6383	Yes	4.3634	0	0.44 (0.24 to 0.64)	Age-standardized
DALYs (Disability-Adjusted Life Years)	Niue	Both	Pancreatitis	1	1992	2021	1.8985	1.2253	2.5761	Yes	5.5614	0	1.9 (1.23 to 2.58)	Age-standardized
DALYs (Disability-Adjusted Life Years)	Niue	Female	Pancreatitis	1	1992	2021	4.2115	3.7486	4.6764	Yes	18.1642	0	4.21 (3.75 to 4.68)	Age-standardized
DALYs (Disability-Adjusted Life Years)	Niue	Male	Pancreatitis	2	1992	2021	-0.2367	-0.4477	-0.0253	Yes	-2.1944	0.028	-0.24 (-0.45 to -0.03)	Age-standardized
DALYs (Disability-Adjusted Life Years)	North Macedonia	Both	Pancreatitis	1	1992	2021	-1.009	-1.2938	-0.7235	Yes	-6.8998	0	-1.01 (-1.29 to -0.72)	Age-standardized
DALYs (Disability-Adjusted Life Years)	North Macedonia	Female	Pancreatitis	3	1992	2021	-1.5961	-2.3836	-0.8023	Yes	-3.925	0	-1.6 (-2.38 to -0.8)	Age-standardized
DALYs (Disability-Adjusted Life Years)	North Macedonia	Male	Pancreatitis	1	1992	2021	-0.6285	-0.9897	-0.2661	Yes	-3.394	0.001	-0.63 (-0.99 to -0.27)	Age-standardized
DALYs (Disability-Adjusted Life Years)	Northern Mariana Islands	Both	Pancreatitis	3	1992	2021	-0.4379	-2.1088	1.2616	No	-0.5082	0.611	-0.44 (-2.11 to 1.26)	Age-standardized
DALYs (Disability-Adjusted Life Years)	Northern Mariana Islands	Female	Pancreatitis	0	1992	2021	0.0601	-1.8305	1.9872	No	0.0645	0.949	0.06 (-1.83 to 1.99)	Age-standardized
DALYs (Disability-Adjusted Life Years)	Northern Mariana Islands	Male	Pancreatitis	4	1992	2021	0.6368	-0.7441	2.0369	No	0.9005	0.368	0.64 (-0.74 to 2.04)	Age-standardized
DALYs (Disability-Adjusted Life Years)	Norway	Both	Pancreatitis	3	1992	2021	-0.595	-1.3585	0.1744	No	-1.517	0.129	-0.6 (-1.36 to 0.17)	Age-standardized
DALYs (Disability-Adjusted Life Years)	Norway	Female	Pancreatitis	5	1992	2021	-0.6466	-2.2164	0.9484	No	-0.7983	0.425	-0.65 (-2.22 to 0.95)	Age-standardized
DALYs (Disability-Adjusted Life Years)	Norway	Male	Pancreatitis	5	1992	2021	-1.0993	-2.2879	0.1037	No	-1.792	0.073	-1.1 (-2.29 to 0.1)	Age-standardized
DALYs (Disability-Adjusted Life Years)	Oman	Both	Pancreatitis	2	1992	2021	-0.9494	-1.1617	-0.7367	Yes	-8.7163	0	-0.95 (-1.16 to -0.74)	Age-standardized
DALYs (Disability-Adjusted Life Years)	Oman	Female	Pancreatitis	3	1992	2021	-0.7148	-0.9827	-0.4461	Yes	-5.2026	0	-0.71 (-0.98 to -0.45)	Age-standardized
DALYs (Disability-Adjusted Life Years)	Oman	Male	Pancreatitis	2	1992	2021	-0.9887	-1.2571	-0.7195	Yes	-7.1728	0	-0.99 (-1.26 to -0.72)	Age-standardized
DALYs (Disability-Adjusted Life Years)	Pakistan	Both	Pancreatitis	3	1992	2021	-0.304	-0.484	-0.1237	Yes	-3.3025	0.001	-0.3 (-0.48 to -0.12)	Age-standardized
DALYs (Disability-Adjusted Life Years)	Pakistan	Female	Pancreatitis	4	1992	2021	0.2622	0.0497	0.4751	Yes	2.4188	0.016	0.26 (0.05 to 0.48)	Age-standardized
DALYs (Disability-Adjusted Life Years)	Pakistan	Male	Pancreatitis	3	1992	2021	-0.9932	-1.1902	-0.7959	Yes	-9.8265	0	-0.99 (-1.19 to -0.8)	Age-standardized
DALYs (Disability-Adjusted Life Years)	Palau	Both	Pancreatitis	3	1992	2021	0.4495	0.1602	0.7396	Yes	3.0481	0.002	0.45 (0.16 to 0.74)	Age-standardized
DALYs (Disability-Adjusted Life Years)	Palau	Female	Pancreatitis	3	1992	2021	1.5818	1.3816	1.7824	Yes	15.5915	0	1.58 (1.38 to 1.78)	Age-standardized
DALYs (Disability-Adjusted Life Years)	Palau	Male	Pancreatitis	3	1992	2021	-0.6571	-1.183	-0.1283	Yes	-2.4341	0.015	-0.66 (-1.18 to -0.13)	Age-standardized
DALYs (Disability-Adjusted Life Years)	Palestine	Both	Pancreatitis	3	1992	2021	-1.6031	-2.0307	-1.1736	Yes	-7.272	0	-1.6 (-2.03 to -1.17)	Age-standardized
DALYs (Disability-Adjusted Life Years)	Palestine	Female	Pancreatitis	3	1992	2021	-1.4586	-2.6118	-0.2916	Yes	-2.4461	0.014	-1.46 (-2.61 to -0.29)	Age-standardized
DALYs (Disability-Adjusted Life Years)	Palestine	Male	Pancreatitis	4	1992	2021	-1.6516	-1.8866	-1.4161	Yes	-13.6467	0	-1.65 (-1.89 to -1.42)	Age-standardized
DALYs (Disability-Adjusted Life Years)	Panama	Both	Pancreatitis	3	1992	2021	-0.6077	-1.1976	-0.0143	Yes	-2.0071	0.045	-0.61 (-1.2 to -0.01)	Age-standardized
DALYs (Disability-Adjusted Life Years)	Panama	Female	Pancreatitis	4	1992	2021	-0.7307	-1.9978	0.5527	No	-1.119	0.263	-0.73 (-2 to 0.55)	Age-standardized
DALYs (Disability-Adjusted Life Years)	Panama	Male	Pancreatitis	5	1992	2021	-0.5439	-1.7609	0.6881	No	-0.8683	0.385	-0.54 (-1.76 to 0.69)	Age-standardized
DALYs (Disability-Adjusted Life Years)	Papua New Guinea	Both	Pancreatitis	2	1992	2021	-1.0704	-1.6586	-0.4788	Yes	-3.5374	0	-1.07 (-1.66 to -0.48)	Age-standardized
DALYs (Disability-Adjusted Life Years)	Papua New Guinea	Female	Pancreatitis	3	1992	2021	-1.4601	-1.9603	-0.9574	Yes	-5.6649	0	-1.46 (-1.96 to -0.96)	Age-standardized
DALYs (Disability-Adjusted Life Years)	Papua New Guinea	Male	Pancreatitis	2	1992	2021	-0.5329	-1.208	0.1468	No	-1.5379	0.124	-0.53 (-1.21 to 0.15)	Age-standardized
DALYs (Disability-Adjusted Life Years)	Paraguay	Both	Pancreatitis	4	1992	2021	-0.6741	-1.5026	0.1614	No	-1.5825	0.114	-0.67 (-1.5 to 0.16)	Age-standardized
DALYs (Disability-Adjusted Life Years)	Paraguay	Female	Pancreatitis	3	1992	2021	-0.4203	-1.1865	0.3519	No	-1.0686	0.285	-0.42 (-1.19 to 0.35)	Age-standardized
DALYs (Disability-Adjusted Life Years)	Paraguay	Male	Pancreatitis	5	1992	2021	-0.7355	-1.4012	-0.0653	Yes	-2.1502	0.032	-0.74 (-1.4 to -0.07)	Age-standardized
DALYs (Disability-Adjusted Life Years)	Peru	Both	Pancreatitis	4	1992	2021	-2.6517	-3.4302	-1.867	Yes	-6.5607	0	-2.65 (-3.43 to -1.87)	Age-standardized
DALYs (Disability-Adjusted Life Years)	Peru	Female	Pancreatitis	5	1992	2021	-3.0452	-4.066	-2.0135	Yes	-5.7267	0	-3.05 (-4.07 to -2.01)	Age-standardized
DALYs (Disability-Adjusted Life Years)	Peru	Male	Pancreatitis	5	1992	2021	-2.3016	-2.824	-1.7765	Yes	-8.5137	0	-2.3 (-2.82 to -1.78)	Age-standardized
DALYs (Disability-Adjusted Life Years)	Philippines	Both	Pancreatitis	2	1992	2021	-0.3376	-0.6292	-0.0451	Yes	-2.2616	0.024	-0.34 (-0.63 to -0.05)	Age-standardized
DALYs (Disability-Adjusted Life Years)	Philippines	Female	Pancreatitis	3	1992	2021	-0.2103	-0.4026	-0.0175	Yes	-2.138	0.033	-0.21 (-0.4 to -0.02)	Age-standardized
DALYs (Disability-Adjusted Life Years)	Philippines	Male	Pancreatitis	0	1992	2021	-0.2669	-0.3751	-0.1585	Yes	-5.0388	0	-0.27 (-0.38 to -0.16)	Age-standardized
DALYs (Disability-Adjusted Life Years)	Poland	Both	Pancreatitis	5	1992	2021	-0.2775	-1.3812	0.8387	No	-0.4893	0.625	-0.28 (-1.38 to 0.84)	Age-standardized
DALYs (Disability-Adjusted Life Years)	Poland	Female	Pancreatitis	2	1992	2021	-1.7039	-2.3918	-1.0113	Yes	-4.7968	0	-1.7 (-2.39 to -1.01)	Age-standardized
DALYs (Disability-Adjusted Life Years)	Poland	Male	Pancreatitis	5	1992	2021	0.2873	-1.4895	2.0961	No	0.3145	0.753	0.29 (-1.49 to 2.1)	Age-standardized
DALYs (Disability-Adjusted Life Years)	Portugal	Both	Pancreatitis	4	1992	2021	-3.2234	-4.0533	-2.3863	Yes	-7.4565	0	-3.22 (-4.05 to -2.39)	Age-standardized
DALYs (Disability-Adjusted Life Years)	Portugal	Female	Pancreatitis	5	1992	2021	-2.8443	-4.3719	-1.2923	Yes	-3.5686	0	-2.84 (-4.37 to -1.29)	Age-standardized
DALYs (Disability-Adjusted Life Years)	Portugal	Male	Pancreatitis	4	1992	2021	-3.649	-5.0679	-2.2089	Yes	-4.9109	0	-3.65 (-5.07 to -2.21)	Age-standardized
DALYs (Disability-Adjusted Life Years)	Puerto Rico	Both	Pancreatitis	3	1992	2021	-3.1996	-4.0797	-2.3115	Yes	-6.9786	0	-3.2 (-4.08 to -2.31)	Age-standardized
DALYs (Disability-Adjusted Life Years)	Puerto Rico	Female	Pancreatitis	2	1992	2021	-3.3728	-4.0229	-2.7182	Yes	-9.9605	0	-3.37 (-4.02 to -2.72)	Age-standardized
DALYs (Disability-Adjusted Life Years)	Puerto Rico	Male	Pancreatitis	3	1992	2021	-3.1625	-4.3219	-1.989	Yes	-5.2291	0	-3.16 (-4.32 to -1.99)	Age-standardized
DALYs (Disability-Adjusted Life Years)	Qatar	Both	Pancreatitis	3	1992	2021	-1.1884	-1.7363	-0.6373	Yes	-4.2134	0	-1.19 (-1.74 to -0.64)	Age-standardized
DALYs (Disability-Adjusted Life Years)	Qatar	Female	Pancreatitis	3	1992	2021	-1.8148	-2.6499	-0.9724	Yes	-4.202	0	-1.81 (-2.65 to -0.97)	Age-standardized
DALYs (Disability-Adjusted Life Years)	Qatar	Male	Pancreatitis	3	1992	2021	-0.9616	-1.9235	0.0097	No	-1.9405	0.052	-0.96 (-1.92 to 0.01)	Age-standardized
DALYs (Disability-Adjusted Life Years)	Republic of Korea	Both	Pancreatitis	4	1992	2021	-2.6458	-2.8278	-2.4635	Yes	-28.0846	0	-2.65 (-2.83 to -2.46)	Age-standardized
DALYs (Disability-Adjusted Life Years)	Republic of Korea	Female	Pancreatitis	4	1992	2021	-2.7173	-2.9797	-2.4542	Yes	-19.9926	0	-2.72 (-2.98 to -2.45)	Age-standardized
DALYs (Disability-Adjusted Life Years)	Republic of Korea	Male	Pancreatitis	4	1992	2021	-2.5692	-2.7444	-2.3937	Yes	-28.3446	0	-2.57 (-2.74 to -2.39)	Age-standardized
DALYs (Disability-Adjusted Life Years)	Republic of Moldova	Both	Pancreatitis	5	1992	2021	-0.6688	-2.1154	0.7992	No	-0.8965	0.37	-0.67 (-2.12 to 0.8)	Age-standardized
DALYs (Disability-Adjusted Life Years)	Republic of Moldova	Female	Pancreatitis	4	1992	2021	-0.6847	-1.6505	0.2906	No	-1.3779	0.168	-0.68 (-1.65 to 0.29)	Age-standardized
DALYs (Disability-Adjusted Life Years)	Republic of Moldova	Male	Pancreatitis	3	1992	2021	-0.7725	-2.3368	0.8169	No	-0.9565	0.339	-0.77 (-2.34 to 0.82)	Age-standardized
DALYs (Disability-Adjusted Life Years)	Romania	Both	Pancreatitis	0	1992	2021	-1.9347	-2.0861	-1.7831	Yes	-25.9009	0	-1.93 (-2.09 to -1.78)	Age-standardized
DALYs (Disability-Adjusted Life Years)	Romania	Female	Pancreatitis	2	1992	2021	-2.9993	-4.725	-1.2424	Yes	-3.3249	0.001	-3 (-4.72 to -1.24)	Age-standardized
DALYs (Disability-Adjusted Life Years)	Romania	Male	Pancreatitis	0	1992	2021	-1.6932	-1.9471	-1.4386	Yes	-13.5257	0	-1.69 (-1.95 to -1.44)	Age-standardized
DALYs (Disability-Adjusted Life Years)	Russian Federation	Both	Pancreatitis	3	1992	2021	0.3843	-0.6973	1.4776	No	0.6939	0.488	0.38 (-0.7 to 1.48)	Age-standardized
DALYs (Disability-Adjusted Life Years)	Russian Federation	Female	Pancreatitis	3	1992	2021	0.0612	-0.7111	0.8394	No	0.1547	0.877	0.06 (-0.71 to 0.84)	Age-standardized
DALYs (Disability-Adjusted Life Years)	Russian Federation	Male	Pancreatitis	3	1992	2021	0.6381	-0.7983	2.0953	No	0.8672	0.386	0.64 (-0.8 to 2.1)	Age-standardized
DALYs (Disability-Adjusted Life Years)	Rwanda	Both	Pancreatitis	2	1992	2021	-0.6669	-0.8769	-0.4564	Yes	-6.1952	0	-0.67 (-0.88 to -0.46)	Age-standardized
DALYs (Disability-Adjusted Life Years)	Rwanda	Female	Pancreatitis	2	1992	2021	-0.4128	-0.5629	-0.2625	Yes	-5.3759	0	-0.41 (-0.56 to -0.26)	Age-standardized
DALYs (Disability-Adjusted Life Years)	Rwanda	Male	Pancreatitis	3	1992	2021	-0.687	-1.0084	-0.3645	Yes	-4.1674	0	-0.69 (-1.01 to -0.36)	Age-standardized
DALYs (Disability-Adjusted Life Years)	Saint Kitts and Nevis	Both	Pancreatitis	4	1992	2021	-0.0656	-0.92	0.7962	No	-0.1498	0.881	-0.07 (-0.92 to 0.8)	Age-standardized
DALYs (Disability-Adjusted Life Years)	Saint Kitts and Nevis	Female	Pancreatitis	5	1992	2021	-1.5295	-2.3514	-0.7005	Yes	-3.6037	0	-1.53 (-2.35 to -0.7)	Age-standardized
DALYs (Disability-Adjusted Life Years)	Saint Kitts and Nevis	Male	Pancreatitis	4	1992	2021	0.4025	-0.7502	1.5687	No	0.6818	0.495	0.4 (-0.75 to 1.57)	Age-standardized
DALYs (Disability-Adjusted Life Years)	Saint Lucia	Both	Pancreatitis	4	1992	2021	-0.6399	-1.5391	0.2674	No	-1.3841	0.166	-0.64 (-1.54 to 0.27)	Age-standardized
DALYs (Disability-Adjusted Life Years)	Saint Lucia	Female	Pancreatitis	3	1992	2021	-0.7716	-1.3038	-0.2364	Yes	-2.8226	0.005	-0.77 (-1.3 to -0.24)	Age-standardized
DALYs (Disability-Adjusted Life Years)	Saint Lucia	Male	Pancreatitis	4	1992	2021	-0.6408	-1.755	0.4859	No	-1.1175	0.264	-0.64 (-1.75 to 0.49)	Age-standardized
DALYs (Disability-Adjusted Life Years)	Saint Vincent and the Grenadines	Both	Pancreatitis	5	1992	2021	-0.079	-1.0582	0.9099	No	-0.1572	0.875	-0.08 (-1.06 to 0.91)	Age-standardized
DALYs (Disability-Adjusted Life Years)	Saint Vincent and the Grenadines	Female	Pancreatitis	5	1992	2021	0.1266	-0.8564	1.1194	No	0.2514	0.802	0.13 (-0.86 to 1.12)	Age-standardized
DALYs (Disability-Adjusted Life Years)	Saint Vincent and the Grenadines	Male	Pancreatitis	5	1992	2021	-0.0446	-1.4157	1.3457	No	-0.0632	0.95	-0.04 (-1.42 to 1.35)	Age-standardized
DALYs (Disability-Adjusted Life Years)	Samoa	Both	Pancreatitis	3	1992	2021	-0.7238	-0.7933	-0.6542	Yes	-20.3101	0	-0.72 (-0.79 to -0.65)	Age-standardized
DALYs (Disability-Adjusted Life Years)	Samoa	Female	Pancreatitis	3	1992	2021	-0.7554	-0.9368	-0.5736	Yes	-8.1199	0	-0.76 (-0.94 to -0.57)	Age-standardized
DALYs (Disability-Adjusted Life Years)	Samoa	Male	Pancreatitis	5	1992	2021	-0.6124	-0.6836	-0.5411	Yes	-16.786	0	-0.61 (-0.68 to -0.54)	Age-standardized
DALYs (Disability-Adjusted Life Years)	San Marino	Both	Pancreatitis	1	1992	2021	-1.0896	-1.3416	-0.837	Yes	-8.4186	0	-1.09 (-1.34 to -0.84)	Age-standardized
DALYs (Disability-Adjusted Life Years)	San Marino	Female	Pancreatitis	1	1992	2021	-1.1873	-1.5033	-0.8703	Yes	-7.3091	0	-1.19 (-1.5 to -0.87)	Age-standardized
DALYs (Disability-Adjusted Life Years)	San Marino	Male	Pancreatitis	3	1992	2021	-0.7665	-1.0385	-0.4939	Yes	-5.4961	0	-0.77 (-1.04 to -0.49)	Age-standardized
DALYs (Disability-Adjusted Life Years)	Sao Tome and Principe	Both	Pancreatitis	0	1992	2021	0.7616	0.422	1.1024	Yes	4.6039	0	0.76 (0.42 to 1.1)	Age-standardized
DALYs (Disability-Adjusted Life Years)	Sao Tome and Principe	Female	Pancreatitis	1	1992	2021	-0.7588	-1.2173	-0.2982	Yes	-3.224	0.001	-0.76 (-1.22 to -0.3)	Age-standardized
DALYs (Disability-Adjusted Life Years)	Sao Tome and Principe	Male	Pancreatitis	0	1992	2021	0.9838	0.6369	1.3318	Yes	5.8285	0	0.98 (0.64 to 1.33)	Age-standardized
DALYs (Disability-Adjusted Life Years)	Saudi Arabia	Both	Pancreatitis	3	1992	2021	-0.8678	-1.061	-0.6743	Yes	-8.7588	0	-0.87 (-1.06 to -0.67)	Age-standardized
DALYs (Disability-Adjusted Life Years)	Saudi Arabia	Female	Pancreatitis	4	1992	2021	-1.2094	-1.5094	-0.9085	Yes	-7.8417	0	-1.21 (-1.51 to -0.91)	Age-standardized
DALYs (Disability-Adjusted Life Years)	Saudi Arabia	Male	Pancreatitis	4	1992	2021	-0.4579	-0.6816	-0.2337	Yes	-3.9989	0	-0.46 (-0.68 to -0.23)	Age-standardized
DALYs (Disability-Adjusted Life Years)	Senegal	Both	Pancreatitis	0	1992	2021	0.0995	-0.1418	0.3414	No	0.8441	0.406	0.1 (-0.14 to 0.34)	Age-standardized
DALYs (Disability-Adjusted Life Years)	Senegal	Female	Pancreatitis	1	1992	2021	-0.2287	-0.7303	0.2755	No	-0.8901	0.373	-0.23 (-0.73 to 0.28)	Age-standardized
DALYs (Disability-Adjusted Life Years)	Senegal	Male	Pancreatitis	2	1992	2021	-0.4303	-1.2944	0.4413	No	-0.9697	0.332	-0.43 (-1.29 to 0.44)	Age-standardized
DALYs (Disability-Adjusted Life Years)	Serbia	Both	Pancreatitis	3	1992	2021	-2.6999	-3.0807	-2.3175	Yes	-13.6781	0	-2.7 (-3.08 to -2.32)	Age-standardized
DALYs (Disability-Adjusted Life Years)	Serbia	Female	Pancreatitis	2	1992	2021	-2.9673	-3.4177	-2.5148	Yes	-12.6892	0	-2.97 (-3.42 to -2.51)	Age-standardized
DALYs (Disability-Adjusted Life Years)	Serbia	Male	Pancreatitis	4	1992	2021	-2.5353	-3.0287	-2.0394	Yes	-9.9176	0	-2.54 (-3.03 to -2.04)	Age-standardized
DALYs (Disability-Adjusted Life Years)	Seychelles	Both	Pancreatitis	0	1992	2021	-0.7182	-1.3828	-0.0492	Yes	-2.1984	0.036	-0.72 (-1.38 to -0.05)	Age-standardized
DALYs (Disability-Adjusted Life Years)	Seychelles	Female	Pancreatitis	1	1992	2021	-0.1507	-0.9397	0.6446	No	-0.3725	0.709	-0.15 (-0.94 to 0.64)	Age-standardized
DALYs (Disability-Adjusted Life Years)	Seychelles	Male	Pancreatitis	1	1992	2021	-3.4145	-4.7658	-2.044	Yes	-4.8327	0	-3.41 (-4.77 to -2.04)	Age-standardized
DALYs (Disability-Adjusted Life Years)	Sierra Leone	Both	Pancreatitis	4	1992	2021	0.5598	0.0463	1.0759	Yes	2.137	0.033	0.56 (0.05 to 1.08)	Age-standardized
DALYs (Disability-Adjusted Life Years)	Sierra Leone	Female	Pancreatitis	4	1992	2021	1.0475	0.7217	1.3743	Yes	6.3242	0	1.05 (0.72 to 1.37)	Age-standardized
DALYs (Disability-Adjusted Life Years)	Sierra Leone	Male	Pancreatitis	4	1992	2021	0.3294	-0.2129	0.8747	No	1.1892	0.234	0.33 (-0.21 to 0.87)	Age-standardized
DALYs (Disability-Adjusted Life Years)	Singapore	Both	Pancreatitis	1	1992	2021	-2.508	-2.7585	-2.2569	Yes	-19.3499	0	-2.51 (-2.76 to -2.26)	Age-standardized
DALYs (Disability-Adjusted Life Years)	Singapore	Female	Pancreatitis	4	1992	2021	-2.5118	-4.2052	-0.7885	Yes	-2.8454	0.004	-2.51 (-4.21 to -0.79)	Age-standardized
DALYs (Disability-Adjusted Life Years)	Singapore	Male	Pancreatitis	4	1992	2021	-2.4728	-3.3035	-1.635	Yes	-5.737	0	-2.47 (-3.3 to -1.64)	Age-standardized
DALYs (Disability-Adjusted Life Years)	Slovakia	Both	Pancreatitis	2	1992	2021	-0.9955	-1.6463	-0.3403	Yes	-2.973	0.003	-1 (-1.65 to -0.34)	Age-standardized
DALYs (Disability-Adjusted Life Years)	Slovakia	Female	Pancreatitis	4	1992	2021	-1.1639	-1.8309	-0.4924	Yes	-3.3888	0.001	-1.16 (-1.83 to -0.49)	Age-standardized
DALYs (Disability-Adjusted Life Years)	Slovakia	Male	Pancreatitis	4	1992	2021	-1.0221	-1.5574	-0.4838	Yes	-3.7126	0	-1.02 (-1.56 to -0.48)	Age-standardized
DALYs (Disability-Adjusted Life Years)	Slovenia	Both	Pancreatitis	4	1992	2021	-3.3582	-4.1948	-2.5144	Yes	-7.7012	0	-3.36 (-4.19 to -2.51)	Age-standardized
DALYs (Disability-Adjusted Life Years)	Slovenia	Female	Pancreatitis	2	1992	2021	-4.1193	-5.4142	-2.8066	Yes	-6.0633	0	-4.12 (-5.41 to -2.81)	Age-standardized
DALYs (Disability-Adjusted Life Years)	Slovenia	Male	Pancreatitis	2	1992	2021	-2.7269	-3.8973	-1.5422	Yes	-4.4764	0	-2.73 (-3.9 to -1.54)	Age-standardized
DALYs (Disability-Adjusted Life Years)	Solomon Islands	Both	Pancreatitis	3	1992	2021	0.2154	-0.0974	0.5292	No	1.3488	0.177	0.22 (-0.1 to 0.53)	Age-standardized
DALYs (Disability-Adjusted Life Years)	Solomon Islands	Female	Pancreatitis	4	1992	2021	0.4615	-0.2977	1.2264	No	1.1896	0.234	0.46 (-0.3 to 1.23)	Age-standardized
DALYs (Disability-Adjusted Life Years)	Solomon Islands	Male	Pancreatitis	2	1992	2021	-0.1098	-0.8911	0.6776	No	-0.2743	0.784	-0.11 (-0.89 to 0.68)	Age-standardized
DALYs (Disability-Adjusted Life Years)	Somalia	Both	Pancreatitis	5	1992	2021	-0.0751	-0.2816	0.1318	No	-0.7122	0.476	-0.08 (-0.28 to 0.13)	Age-standardized
DALYs (Disability-Adjusted Life Years)	Somalia	Female	Pancreatitis	5	1992	2021	0.1017	-0.1416	0.3455	No	0.8187	0.413	0.1 (-0.14 to 0.35)	Age-standardized
DALYs (Disability-Adjusted Life Years)	Somalia	Male	Pancreatitis	5	1992	2021	-0.1368	-0.3257	0.0525	No	-1.4171	0.156	-0.14 (-0.33 to 0.05)	Age-standardized
DALYs (Disability-Adjusted Life Years)	South Africa	Both	Pancreatitis	2	1992	2021	0.4241	0.2324	0.6161	Yes	4.3414	0	0.42 (0.23 to 0.62)	Age-standardized
DALYs (Disability-Adjusted Life Years)	South Africa	Female	Pancreatitis	3	1992	2021	-0.9232	-1.1653	-0.6804	Yes	-7.4274	0	-0.92 (-1.17 to -0.68)	Age-standardized
DALYs (Disability-Adjusted Life Years)	South Africa	Male	Pancreatitis	3	1992	2021	0.6016	0.2698	0.9345	Yes	3.5583	0	0.6 (0.27 to 0.93)	Age-standardized
DALYs (Disability-Adjusted Life Years)	South Sudan	Both	Pancreatitis	3	1992	2021	0.3962	-0.3388	1.1367	No	1.0547	0.292	0.4 (-0.34 to 1.14)	Age-standardized
DALYs (Disability-Adjusted Life Years)	South Sudan	Female	Pancreatitis	3	1992	2021	0.8169	0.2297	1.4077	Yes	2.7296	0.006	0.82 (0.23 to 1.41)	Age-standardized
DALYs (Disability-Adjusted Life Years)	South Sudan	Male	Pancreatitis	3	1992	2021	0.425	-0.3361	1.192	No	1.0926	0.275	0.42 (-0.34 to 1.19)	Age-standardized
DALYs (Disability-Adjusted Life Years)	Spain	Both	Pancreatitis	3	1992	2021	-2.0476	-2.8122	-1.277	Yes	-5.1743	0	-2.05 (-2.81 to -1.28)	Age-standardized
DALYs (Disability-Adjusted Life Years)	Spain	Female	Pancreatitis	2	1992	2021	-1.4975	-2.5009	-0.4837	Yes	-2.8881	0.004	-1.5 (-2.5 to -0.48)	Age-standardized
DALYs (Disability-Adjusted Life Years)	Spain	Male	Pancreatitis	3	1992	2021	-2.4726	-3.4296	-1.5061	Yes	-4.9762	0	-2.47 (-3.43 to -1.51)	Age-standardized
DALYs (Disability-Adjusted Life Years)	Sri Lanka	Both	Pancreatitis	0	1992	2021	-2.2767	-2.4857	-2.0673	Yes	-22.0345	0	-2.28 (-2.49 to -2.07)	Age-standardized
DALYs (Disability-Adjusted Life Years)	Sri Lanka	Female	Pancreatitis	2	1992	2021	-1.9368	-2.2737	-1.5987	Yes	-11.1373	0	-1.94 (-2.27 to -1.6)	Age-standardized
DALYs (Disability-Adjusted Life Years)	Sri Lanka	Male	Pancreatitis	0	1992	2021	-2.2672	-2.5139	-2.0199	Yes	-18.5879	0	-2.27 (-2.51 to -2.02)	Age-standardized
DALYs (Disability-Adjusted Life Years)	Sudan	Both	Pancreatitis	5	1992	2021	0.2619	0.1072	0.4169	Yes	3.3199	0.001	0.26 (0.11 to 0.42)	Age-standardized
DALYs (Disability-Adjusted Life Years)	Sudan	Female	Pancreatitis	4	1992	2021	0.2422	0.1058	0.3788	Yes	3.4825	0	0.24 (0.11 to 0.38)	Age-standardized
DALYs (Disability-Adjusted Life Years)	Sudan	Male	Pancreatitis	4	1992	2021	0.2643	0.1452	0.3835	Yes	4.3536	0	0.26 (0.15 to 0.38)	Age-standardized
DALYs (Disability-Adjusted Life Years)	Suriname	Both	Pancreatitis	4	1992	2021	-0.6095	-1.2619	0.0471	No	-1.8198	0.069	-0.61 (-1.26 to 0.05)	Age-standardized
DALYs (Disability-Adjusted Life Years)	Suriname	Female	Pancreatitis	4	1992	2021	-0.6496	-1.5363	0.2451	No	-1.4248	0.154	-0.65 (-1.54 to 0.25)	Age-standardized
DALYs (Disability-Adjusted Life Years)	Suriname	Male	Pancreatitis	4	1992	2021	-0.6273	-1.3362	0.0866	No	-1.723	0.085	-0.63 (-1.34 to 0.09)	Age-standardized
DALYs (Disability-Adjusted Life Years)	Sweden	Both	Pancreatitis	5	1992	2021	0.1572	-0.6082	0.9285	No	0.4013	0.688	0.16 (-0.61 to 0.93)	Age-standardized
DALYs (Disability-Adjusted Life Years)	Sweden	Female	Pancreatitis	0	1992	2021	0.4911	0.3931	0.5891	Yes	10.2912	0	0.49 (0.39 to 0.59)	Age-standardized
DALYs (Disability-Adjusted Life Years)	Sweden	Male	Pancreatitis	4	1992	2021	-0.0178	-0.9425	0.9155	No	-0.0376	0.97	-0.02 (-0.94 to 0.92)	Age-standardized
DALYs (Disability-Adjusted Life Years)	Switzerland	Both	Pancreatitis	5	1992	2021	-3.1839	-3.7858	-2.5783	Yes	-10.1699	0	-3.18 (-3.79 to -2.58)	Age-standardized
DALYs (Disability-Adjusted Life Years)	Switzerland	Female	Pancreatitis	4	1992	2021	-2.5537	-3.3357	-1.7654	Yes	-6.2927	0	-2.55 (-3.34 to -1.77)	Age-standardized
DALYs (Disability-Adjusted Life Years)	Switzerland	Male	Pancreatitis	4	1992	2021	-3.4259	-4.3755	-2.4669	Yes	-6.9143	0	-3.43 (-4.38 to -2.47)	Age-standardized
DALYs (Disability-Adjusted Life Years)	Syrian Arab Republic	Both	Pancreatitis	4	1992	2021	-0.961	-1.1434	-0.7783	Yes	-10.2697	0	-0.96 (-1.14 to -0.78)	Age-standardized
DALYs (Disability-Adjusted Life Years)	Syrian Arab Republic	Female	Pancreatitis	4	1992	2021	-1.166	-1.3634	-0.9682	Yes	-11.5004	0	-1.17 (-1.36 to -0.97)	Age-standardized
DALYs (Disability-Adjusted Life Years)	Syrian Arab Republic	Male	Pancreatitis	2	1992	2021	-0.7315	-0.8696	-0.5932	Yes	-10.3369	0	-0.73 (-0.87 to -0.59)	Age-standardized
DALYs (Disability-Adjusted Life Years)	Taiwan (Province of China)	Both	Pancreatitis	4	1992	2021	-2.5801	-3.2873	-1.8678	Yes	-7.0323	0	-2.58 (-3.29 to -1.87)	Age-standardized
DALYs (Disability-Adjusted Life Years)	Taiwan (Province of China)	Female	Pancreatitis	4	1992	2021	-2.5002	-4.5342	-0.4227	Yes	-2.3538	0.019	-2.5 (-4.53 to -0.42)	Age-standardized
DALYs (Disability-Adjusted Life Years)	Taiwan (Province of China)	Male	Pancreatitis	3	1992	2021	-2.8974	-4.1456	-1.6329	Yes	-4.454	0	-2.9 (-4.15 to -1.63)	Age-standardized
DALYs (Disability-Adjusted Life Years)	Tajikistan	Both	Pancreatitis	4	1992	2021	-0.4998	-0.7217	-0.2775	Yes	-4.4005	0	-0.5 (-0.72 to -0.28)	Age-standardized
DALYs (Disability-Adjusted Life Years)	Tajikistan	Female	Pancreatitis	5	1992	2021	-0.7185	-0.9836	-0.4527	Yes	-5.2861	0	-0.72 (-0.98 to -0.45)	Age-standardized
DALYs (Disability-Adjusted Life Years)	Tajikistan	Male	Pancreatitis	5	1992	2021	-0.2553	-0.5091	-0.0008	Yes	-1.9662	0.049	-0.26 (-0.51 to 0)	Age-standardized
DALYs (Disability-Adjusted Life Years)	Thailand	Both	Pancreatitis	5	1992	2021	-0.6409	-1.2029	-0.0756	Yes	-2.2212	0.026	-0.64 (-1.2 to -0.08)	Age-standardized
DALYs (Disability-Adjusted Life Years)	Thailand	Female	Pancreatitis	3	1992	2021	-1.2271	-1.5668	-0.8861	Yes	-7.0233	0	-1.23 (-1.57 to -0.89)	Age-standardized
DALYs (Disability-Adjusted Life Years)	Thailand	Male	Pancreatitis	5	1992	2021	-0.5144	-1.1514	0.1267	No	-1.5735	0.116	-0.51 (-1.15 to 0.13)	Age-standardized
DALYs (Disability-Adjusted Life Years)	Timor-Leste	Both	Pancreatitis	3	1992	2021	-0.4703	-1.8315	0.9097	No	-0.671	0.502	-0.47 (-1.83 to 0.91)	Age-standardized
DALYs (Disability-Adjusted Life Years)	Timor-Leste	Female	Pancreatitis	3	1992	2021	-0.3191	-1.5453	0.9224	No	-0.5061	0.613	-0.32 (-1.55 to 0.92)	Age-standardized
DALYs (Disability-Adjusted Life Years)	Timor-Leste	Male	Pancreatitis	3	1992	2021	-0.412	-1.8189	1.0152	No	-0.5686	0.57	-0.41 (-1.82 to 1.02)	Age-standardized
DALYs (Disability-Adjusted Life Years)	Togo	Both	Pancreatitis	5	1992	2021	-0.0662	-0.3798	0.2483	No	-0.4132	0.679	-0.07 (-0.38 to 0.25)	Age-standardized
DALYs (Disability-Adjusted Life Years)	Togo	Female	Pancreatitis	4	1992	2021	0.0449	-0.2044	0.2949	No	0.3528	0.724	0.04 (-0.2 to 0.29)	Age-standardized
DALYs (Disability-Adjusted Life Years)	Togo	Male	Pancreatitis	5	1992	2021	-0.1924	-0.4996	0.1158	No	-1.224	0.221	-0.19 (-0.5 to 0.12)	Age-standardized
DALYs (Disability-Adjusted Life Years)	Tokelau	Both	Pancreatitis	1	1992	2021	2.2119	1.6507	2.7763	Yes	7.788	0	2.21 (1.65 to 2.78)	Age-standardized
DALYs (Disability-Adjusted Life Years)	Tokelau	Female	Pancreatitis	1	1992	2021	3.9716	3.0852	4.8655	Yes	8.9161	0	3.97 (3.09 to 4.87)	Age-standardized
DALYs (Disability-Adjusted Life Years)	Tokelau	Male	Pancreatitis	1	1992	2021	0.5903	0.367	0.8142	Yes	5.1896	0	0.59 (0.37 to 0.81)	Age-standardized
DALYs (Disability-Adjusted Life Years)	Tonga	Both	Pancreatitis	5	1992	2021	0.2371	-0.4295	0.9081	No	0.6955	0.487	0.24 (-0.43 to 0.91)	Age-standardized
DALYs (Disability-Adjusted Life Years)	Tonga	Female	Pancreatitis	5	1992	2021	-0.1447	-1.3158	1.0402	No	-0.2406	0.81	-0.14 (-1.32 to 1.04)	Age-standardized
DALYs (Disability-Adjusted Life Years)	Tonga	Male	Pancreatitis	3	1992	2021	0.4899	0.174	0.8068	Yes	3.0419	0.002	0.49 (0.17 to 0.81)	Age-standardized
DALYs (Disability-Adjusted Life Years)	Trinidad and Tobago	Both	Pancreatitis	5	1992	2021	-0.0889	-1.9553	1.813	No	-0.0925	0.926	-0.09 (-1.96 to 1.81)	Age-standardized
DALYs (Disability-Adjusted Life Years)	Trinidad and Tobago	Female	Pancreatitis	0	1992	2021	-0.8959	-1.2094	-0.5814	Yes	-5.8186	0	-0.9 (-1.21 to -0.58)	Age-standardized
DALYs (Disability-Adjusted Life Years)	Trinidad and Tobago	Male	Pancreatitis	4	1992	2021	0.4138	-1.282	2.1387	No	0.4752	0.635	0.41 (-1.28 to 2.14)	Age-standardized
DALYs (Disability-Adjusted Life Years)	Tunisia	Both	Pancreatitis	3	1992	2021	-0.3323	-0.4503	-0.214	Yes	-5.5026	0	-0.33 (-0.45 to -0.21)	Age-standardized
DALYs (Disability-Adjusted Life Years)	Tunisia	Female	Pancreatitis	5	1992	2021	-0.4347	-0.6181	-0.251	Yes	-4.6322	0	-0.43 (-0.62 to -0.25)	Age-standardized
DALYs (Disability-Adjusted Life Years)	Tunisia	Male	Pancreatitis	5	1992	2021	-0.2321	-0.3238	-0.1403	Yes	-4.9544	0	-0.23 (-0.32 to -0.14)	Age-standardized
DALYs (Disability-Adjusted Life Years)	Turkey	Both	Pancreatitis	5	1992	2021	-2.0737	-2.4885	-1.6572	Yes	-9.6758	0	-2.07 (-2.49 to -1.66)	Age-standardized
DALYs (Disability-Adjusted Life Years)	Turkey	Female	Pancreatitis	2	1992	2021	-2.2506	-2.4064	-2.0945	Yes	-27.9688	0	-2.25 (-2.41 to -2.09)	Age-standardized
DALYs (Disability-Adjusted Life Years)	Turkey	Male	Pancreatitis	5	1992	2021	-1.8238	-2.2015	-1.4446	Yes	-9.3581	0	-1.82 (-2.2 to -1.44)	Age-standardized
DALYs (Disability-Adjusted Life Years)	Turkmenistan	Both	Pancreatitis	3	1992	2021	0.4339	0.0431	0.8263	Yes	2.1765	0.03	0.43 (0.04 to 0.83)	Age-standardized
DALYs (Disability-Adjusted Life Years)	Turkmenistan	Female	Pancreatitis	3	1992	2021	0.2692	-0.1876	0.728	No	1.1539	0.249	0.27 (-0.19 to 0.73)	Age-standardized
DALYs (Disability-Adjusted Life Years)	Turkmenistan	Male	Pancreatitis	4	1992	2021	0.53	0.1374	0.9242	Yes	2.6478	0.008	0.53 (0.14 to 0.92)	Age-standardized
DALYs (Disability-Adjusted Life Years)	Tuvalu	Both	Pancreatitis	4	1992	2021	-0.7568	-0.9015	-0.6118	Yes	-10.2011	0	-0.76 (-0.9 to -0.61)	Age-standardized
DALYs (Disability-Adjusted Life Years)	Tuvalu	Female	Pancreatitis	5	1992	2021	-1.0495	-1.4481	-0.6492	Yes	-5.1221	0	-1.05 (-1.45 to -0.65)	Age-standardized
DALYs (Disability-Adjusted Life Years)	Tuvalu	Male	Pancreatitis	5	1992	2021	-0.7851	-0.8613	-0.7089	Yes	-20.1133	0	-0.79 (-0.86 to -0.71)	Age-standardized
DALYs (Disability-Adjusted Life Years)	Uganda	Both	Pancreatitis	3	1992	2021	0.3676	0.143	0.5927	Yes	3.2101	0.001	0.37 (0.14 to 0.59)	Age-standardized
DALYs (Disability-Adjusted Life Years)	Uganda	Female	Pancreatitis	3	1992	2021	0.9101	0.7097	1.111	Yes	8.9321	0	0.91 (0.71 to 1.11)	Age-standardized
DALYs (Disability-Adjusted Life Years)	Uganda	Male	Pancreatitis	3	1992	2021	0.1389	-0.0882	0.3664	No	1.1984	0.231	0.14 (-0.09 to 0.37)	Age-standardized
DALYs (Disability-Adjusted Life Years)	Ukraine	Both	Pancreatitis	3	1992	2021	-0.7095	-1.3303	-0.0847	Yes	-2.2248	0.026	-0.71 (-1.33 to -0.08)	Age-standardized
DALYs (Disability-Adjusted Life Years)	Ukraine	Female	Pancreatitis	5	1992	2021	-0.9131	-1.4014	-0.4223	Yes	-3.639	0	-0.91 (-1.4 to -0.42)	Age-standardized
DALYs (Disability-Adjusted Life Years)	Ukraine	Male	Pancreatitis	3	1992	2021	-0.6629	-1.7044	0.3896	No	-1.2368	0.216	-0.66 (-1.7 to 0.39)	Age-standardized
DALYs (Disability-Adjusted Life Years)	United Arab Emirates	Both	Pancreatitis	4	1992	2021	-0.7763	-1.9652	0.427	No	-1.2672	0.205	-0.78 (-1.97 to 0.43)	Age-standardized
DALYs (Disability-Adjusted Life Years)	United Arab Emirates	Female	Pancreatitis	4	1992	2021	-1.6788	-3.1486	-0.1866	Yes	-2.203	0.028	-1.68 (-3.15 to -0.19)	Age-standardized
DALYs (Disability-Adjusted Life Years)	United Arab Emirates	Male	Pancreatitis	4	1992	2021	-0.3632	-1.8985	1.1962	No	-0.4592	0.646	-0.36 (-1.9 to 1.2)	Age-standardized
DALYs (Disability-Adjusted Life Years)	United Kingdom	Both	Pancreatitis	3	1992	2021	-1.3654	-2.3059	-0.4159	Yes	-2.8127	0.005	-1.37 (-2.31 to -0.42)	Age-standardized
DALYs (Disability-Adjusted Life Years)	United Kingdom	Female	Pancreatitis	1	1992	2021	-1.4135	-1.6969	-1.1293	Yes	-9.6914	0	-1.41 (-1.7 to -1.13)	Age-standardized
DALYs (Disability-Adjusted Life Years)	United Kingdom	Male	Pancreatitis	3	1992	2021	-1.0295	-2.2838	0.2409	No	-1.5902	0.112	-1.03 (-2.28 to 0.24)	Age-standardized
DALYs (Disability-Adjusted Life Years)	United Republic of Tanzania	Both	Pancreatitis	5	1992	2021	0.5499	0.2728	0.8278	Yes	3.895	0	0.55 (0.27 to 0.83)	Age-standardized
DALYs (Disability-Adjusted Life Years)	United Republic of Tanzania	Female	Pancreatitis	3	1992	2021	0.7968	0.6537	0.94	Yes	10.9513	0	0.8 (0.65 to 0.94)	Age-standardized
DALYs (Disability-Adjusted Life Years)	United Republic of Tanzania	Male	Pancreatitis	4	1992	2021	0.4954	0.205	0.7866	Yes	3.3474	0.001	0.5 (0.2 to 0.79)	Age-standardized
DALYs (Disability-Adjusted Life Years)	United States Virgin Islands	Both	Pancreatitis	3	1992	2021	1.1854	-0.3779	2.7732	No	1.4834	0.138	1.19 (-0.38 to 2.77)	Age-standardized
DALYs (Disability-Adjusted Life Years)	United States Virgin Islands	Female	Pancreatitis	2	1992	2021	0.2001	-1.3463	1.7707	No	0.2519	0.801	0.2 (-1.35 to 1.77)	Age-standardized
DALYs (Disability-Adjusted Life Years)	United States Virgin Islands	Male	Pancreatitis	3	1992	2021	1.687	-0.4835	3.9047	No	1.5197	0.129	1.69 (-0.48 to 3.9)	Age-standardized
DALYs (Disability-Adjusted Life Years)	United States of America	Both	Pancreatitis	3	1992	2021	-0.2063	-0.8492	0.4407	No	-0.6264	0.531	-0.21 (-0.85 to 0.44)	Age-standardized
DALYs (Disability-Adjusted Life Years)	United States of America	Female	Pancreatitis	1	1992	2021	-0.6757	-0.9635	-0.387	Yes	-4.5789	0	-0.68 (-0.96 to -0.39)	Age-standardized
DALYs (Disability-Adjusted Life Years)	United States of America	Male	Pancreatitis	5	1992	2021	0.2111	-0.8788	1.3129	No	0.3779	0.705	0.21 (-0.88 to 1.31)	Age-standardized
DALYs (Disability-Adjusted Life Years)	Uruguay	Both	Pancreatitis	3	1992	2021	-0.9215	-1.6743	-0.163	Yes	-2.3792	0.017	-0.92 (-1.67 to -0.16)	Age-standardized
DALYs (Disability-Adjusted Life Years)	Uruguay	Female	Pancreatitis	2	1992	2021	-1.2533	-2.1291	-0.3696	Yes	-2.7745	0.006	-1.25 (-2.13 to -0.37)	Age-standardized
DALYs (Disability-Adjusted Life Years)	Uruguay	Male	Pancreatitis	3	1992	2021	-0.3573	-1.2106	0.5033	No	-0.8158	0.415	-0.36 (-1.21 to 0.5)	Age-standardized
DALYs (Disability-Adjusted Life Years)	Uzbekistan	Both	Pancreatitis	3	1992	2021	-0.2894	-0.5763	-0.0017	Yes	-1.9717	0.049	-0.29 (-0.58 to 0)	Age-standardized
DALYs (Disability-Adjusted Life Years)	Uzbekistan	Female	Pancreatitis	2	1992	2021	-0.7082	-1.0562	-0.3591	Yes	-3.9683	0	-0.71 (-1.06 to -0.36)	Age-standardized
DALYs (Disability-Adjusted Life Years)	Uzbekistan	Male	Pancreatitis	5	1992	2021	-0.1455	-0.5389	0.2494	No	-0.723	0.47	-0.15 (-0.54 to 0.25)	Age-standardized
DALYs (Disability-Adjusted Life Years)	Vanuatu	Both	Pancreatitis	3	1992	2021	-0.2429	-0.7686	0.2857	No	-0.9019	0.367	-0.24 (-0.77 to 0.29)	Age-standardized
DALYs (Disability-Adjusted Life Years)	Vanuatu	Female	Pancreatitis	5	1992	2021	-0.2764	-1.2681	0.7252	No	-0.5429	0.587	-0.28 (-1.27 to 0.73)	Age-standardized
DALYs (Disability-Adjusted Life Years)	Vanuatu	Male	Pancreatitis	3	1992	2021	-0.2597	-0.6596	0.1418	No	-1.2687	0.205	-0.26 (-0.66 to 0.14)	Age-standardized
DALYs (Disability-Adjusted Life Years)	Venezuela (Bolivarian Republic of)	Both	Pancreatitis	5	1992	2021	0.5794	-0.153	1.3171	No	1.5494	0.121	0.58 (-0.15 to 1.32)	Age-standardized
DALYs (Disability-Adjusted Life Years)	Venezuela (Bolivarian Republic of)	Female	Pancreatitis	4	1992	2021	0.452	-0.7692	1.6883	No	0.7226	0.47	0.45 (-0.77 to 1.69)	Age-standardized
DALYs (Disability-Adjusted Life Years)	Venezuela (Bolivarian Republic of)	Male	Pancreatitis	5	1992	2021	0.6463	-0.3787	1.6818	No	1.2335	0.217	0.65 (-0.38 to 1.68)	Age-standardized
DALYs (Disability-Adjusted Life Years)	Viet Nam	Both	Pancreatitis	2	1992	2021	-0.6542	-0.6927	-0.6156	Yes	-33.16	0	-0.65 (-0.69 to -0.62)	Age-standardized
DALYs (Disability-Adjusted Life Years)	Viet Nam	Female	Pancreatitis	4	1992	2021	-0.7378	-0.8162	-0.6593	Yes	-18.3668	0	-0.74 (-0.82 to -0.66)	Age-standardized
DALYs (Disability-Adjusted Life Years)	Viet Nam	Male	Pancreatitis	2	1992	2021	-0.7692	-0.8099	-0.7285	Yes	-36.8923	0	-0.77 (-0.81 to -0.73)	Age-standardized
DALYs (Disability-Adjusted Life Years)	Yemen	Both	Pancreatitis	3	1992	2021	0.3355	-0.1571	0.8305	No	1.3337	0.182	0.34 (-0.16 to 0.83)	Age-standardized
DALYs (Disability-Adjusted Life Years)	Yemen	Female	Pancreatitis	3	1992	2021	0.4337	-0.1656	1.0366	No	1.4173	0.156	0.43 (-0.17 to 1.04)	Age-standardized
DALYs (Disability-Adjusted Life Years)	Yemen	Male	Pancreatitis	2	1992	2021	0.3081	-0.1248	0.7428	No	1.3941	0.163	0.31 (-0.12 to 0.74)	Age-standardized
DALYs (Disability-Adjusted Life Years)	Zambia	Both	Pancreatitis	4	1992	2021	-0.1927	-0.3538	-0.0314	Yes	-2.3407	0.019	-0.19 (-0.35 to -0.03)	Age-standardized
DALYs (Disability-Adjusted Life Years)	Zambia	Female	Pancreatitis	5	1992	2021	-0.1001	-0.2306	0.0306	No	-1.5011	0.133	-0.1 (-0.23 to 0.03)	Age-standardized
DALYs (Disability-Adjusted Life Years)	Zambia	Male	Pancreatitis	3	1992	2021	-0.258	-0.4448	-0.0708	Yes	-2.7003	0.007	-0.26 (-0.44 to -0.07)	Age-standardized
DALYs (Disability-Adjusted Life Years)	Zimbabwe	Both	Pancreatitis	2	1992	2021	1.0345	0.5982	1.4728	Yes	4.6603	0	1.03 (0.6 to 1.47)	Age-standardized
DALYs (Disability-Adjusted Life Years)	Zimbabwe	Female	Pancreatitis	2	1992	2021	1.2884	1.0528	1.5246	Yes	10.7724	0	1.29 (1.05 to 1.52)	Age-standardized
DALYs (Disability-Adjusted Life Years)	Zimbabwe	Male	Pancreatitis	2	1992	2021	1.0266	0.5992	1.4558	Yes	4.7222	0	1.03 (0.6 to 1.46)	Age-standardized
Incidence	Afghanistan	Both	Pancreatitis	5	1992	2021	0.0683	0.0559	0.0807	Yes	10.7859	0	0.07 (0.06 to 0.08)	Age-standardized
Incidence	Afghanistan	Female	Pancreatitis	5	1992	2021	0.0598	0.052	0.0676	Yes	15.0344	0	0.06 (0.05 to 0.07)	Age-standardized
Incidence	Afghanistan	Male	Pancreatitis	4	1992	2021	0.0437	0.0325	0.0548	Yes	7.6626	0	0.04 (0.03 to 0.05)	Age-standardized
Incidence	Albania	Both	Pancreatitis	4	1992	2021	-0.0584	-0.0827	-0.034	Yes	-4.7007	0	-0.06 (-0.08 to -0.03)	Age-standardized
Incidence	Albania	Female	Pancreatitis	3	1992	2021	-0.106	-0.1559	-0.0561	Yes	-4.1635	0	-0.11 (-0.16 to -0.06)	Age-standardized
Incidence	Albania	Male	Pancreatitis	3	1992	2021	-0.0515	-0.0893	-0.0136	Yes	-2.6666	0.008	-0.05 (-0.09 to -0.01)	Age-standardized
Incidence	Algeria	Both	Pancreatitis	3	1992	2021	-0.1298	-0.1548	-0.1047	Yes	-10.1358	0	-0.13 (-0.15 to -0.1)	Age-standardized
Incidence	Algeria	Female	Pancreatitis	3	1992	2021	-0.1091	-0.1449	-0.0733	Yes	-5.965	0	-0.11 (-0.14 to -0.07)	Age-standardized
Incidence	Algeria	Male	Pancreatitis	2	1992	2021	-0.1519	-0.177	-0.1268	Yes	-11.8483	0	-0.15 (-0.18 to -0.13)	Age-standardized
Incidence	American Samoa	Both	Pancreatitis	4	1992	2021	0.1063	0.0928	0.1198	Yes	15.4165	0	0.11 (0.09 to 0.12)	Age-standardized
Incidence	American Samoa	Female	Pancreatitis	5	1992	2021	0.1193	0.1047	0.134	Yes	15.9773	0	0.12 (0.1 to 0.13)	Age-standardized
Incidence	American Samoa	Male	Pancreatitis	5	1992	2021	0.092	0.0786	0.1054	Yes	13.4752	0	0.09 (0.08 to 0.11)	Age-standardized
Incidence	Andorra	Both	Pancreatitis	4	1992	2021	-0.1976	-0.2377	-0.1575	Yes	-9.6533	0	-0.2 (-0.24 to -0.16)	Age-standardized
Incidence	Andorra	Female	Pancreatitis	5	1992	2021	-0.1923	-0.2753	-0.1092	Yes	-4.532	0	-0.19 (-0.28 to -0.11)	Age-standardized
Incidence	Andorra	Male	Pancreatitis	3	1992	2021	-0.2203	-0.2401	-0.2005	Yes	-21.804	0	-0.22 (-0.24 to -0.2)	Age-standardized
Incidence	Angola	Both	Pancreatitis	4	1992	2021	0.036	0.0215	0.0504	Yes	4.8725	0	0.04 (0.02 to 0.05)	Age-standardized
Incidence	Angola	Female	Pancreatitis	4	1992	2021	0.0263	0.0065	0.0461	Yes	2.5998	0.009	0.03 (0.01 to 0.05)	Age-standardized
Incidence	Angola	Male	Pancreatitis	5	1992	2021	0.0471	0.033	0.0612	Yes	6.56	0	0.05 (0.03 to 0.06)	Age-standardized
Incidence	Antigua and Barbuda	Both	Pancreatitis	3	1992	2021	-0.057	-0.0651	-0.0489	Yes	-13.7659	0	-0.06 (-0.07 to -0.05)	Age-standardized
Incidence	Antigua and Barbuda	Female	Pancreatitis	3	1992	2021	-0.034	-0.0402	-0.0279	Yes	-10.8248	0	-0.03 (-0.04 to -0.03)	Age-standardized
Incidence	Antigua and Barbuda	Male	Pancreatitis	3	1992	2021	-0.0668	-0.1092	-0.0244	Yes	-3.0877	0.002	-0.07 (-0.11 to -0.02)	Age-standardized
Incidence	Argentina	Both	Pancreatitis	3	1992	2021	-0.0313	-0.1354	0.0729	No	-0.5888	0.556	-0.03 (-0.14 to 0.07)	Age-standardized
Incidence	Argentina	Female	Pancreatitis	3	1992	2021	-0.0301	-0.1599	0.0999	No	-0.4538	0.65	-0.03 (-0.16 to 0.1)	Age-standardized
Incidence	Argentina	Male	Pancreatitis	2	1992	2021	0.0459	0.0137	0.078	Yes	2.7983	0.005	0.05 (0.01 to 0.08)	Age-standardized
Incidence	Armenia	Both	Pancreatitis	4	1992	2021	0.4313	0.3653	0.4974	Yes	12.8197	0	0.43 (0.37 to 0.5)	Age-standardized
Incidence	Armenia	Female	Pancreatitis	3	1992	2021	0.486	0.4181	0.554	Yes	14.0575	0	0.49 (0.42 to 0.55)	Age-standardized
Incidence	Armenia	Male	Pancreatitis	5	1992	2021	0.3664	0.3211	0.4119	Yes	15.8489	0	0.37 (0.32 to 0.41)	Age-standardized
Incidence	Australia	Both	Pancreatitis	5	1992	2021	-0.284	-0.3186	-0.2493	Yes	-16.038	0	-0.28 (-0.32 to -0.25)	Age-standardized
Incidence	Australia	Female	Pancreatitis	4	1992	2021	-0.277	-0.2968	-0.2573	Yes	-27.4918	0	-0.28 (-0.3 to -0.26)	Age-standardized
Incidence	Australia	Male	Pancreatitis	3	1992	2021	-0.2748	-0.3078	-0.2418	Yes	-16.3019	0	-0.27 (-0.31 to -0.24)	Age-standardized
Incidence	Austria	Both	Pancreatitis	5	1992	2021	0.3519	0.2809	0.4229	Yes	9.7316	0	0.35 (0.28 to 0.42)	Age-standardized
Incidence	Austria	Female	Pancreatitis	4	1992	2021	0.6284	0.5846	0.6721	Yes	28.2401	0	0.63 (0.58 to 0.67)	Age-standardized
Incidence	Austria	Male	Pancreatitis	5	1992	2021	0.0722	-0.0226	0.167	No	1.4923	0.136	0.07 (-0.02 to 0.17)	Age-standardized
Incidence	Azerbaijan	Both	Pancreatitis	5	1992	2021	0.0687	0.0508	0.0865	Yes	7.5417	0	0.07 (0.05 to 0.09)	Age-standardized
Incidence	Azerbaijan	Female	Pancreatitis	3	1992	2021	0.0422	0.0109	0.0735	Yes	2.6422	0.008	0.04 (0.01 to 0.07)	Age-standardized
Incidence	Azerbaijan	Male	Pancreatitis	5	1992	2021	0.0663	0.0219	0.1108	Yes	2.9271	0.003	0.07 (0.02 to 0.11)	Age-standardized
Incidence	Bahamas	Both	Pancreatitis	5	1992	2021	-0.0892	-0.1302	-0.0481	Yes	-4.2557	0	-0.09 (-0.13 to -0.05)	Age-standardized
Incidence	Bahamas	Female	Pancreatitis	5	1992	2021	-0.0826	-0.1341	-0.0309	Yes	-3.1349	0.002	-0.08 (-0.13 to -0.03)	Age-standardized
Incidence	Bahamas	Male	Pancreatitis	3	1992	2021	-0.0951	-0.1202	-0.0701	Yes	-7.446	0	-0.1 (-0.12 to -0.07)	Age-standardized
Incidence	Bahrain	Both	Pancreatitis	4	1992	2021	-0.3139	-0.3419	-0.2859	Yes	-21.9484	0	-0.31 (-0.34 to -0.29)	Age-standardized
Incidence	Bahrain	Female	Pancreatitis	4	1992	2021	-0.3167	-0.4107	-0.2226	Yes	-6.5893	0	-0.32 (-0.41 to -0.22)	Age-standardized
Incidence	Bahrain	Male	Pancreatitis	5	1992	2021	-0.3523	-0.4059	-0.2988	Yes	-12.8688	0	-0.35 (-0.41 to -0.3)	Age-standardized
Incidence	Bangladesh	Both	Pancreatitis	5	1992	2021	0.2242	0.176	0.2725	Yes	9.1252	0	0.22 (0.18 to 0.27)	Age-standardized
Incidence	Bangladesh	Female	Pancreatitis	2	1992	2021	0.2219	0.1834	0.2604	Yes	11.319	0	0.22 (0.18 to 0.26)	Age-standardized
Incidence	Bangladesh	Male	Pancreatitis	5	1992	2021	0.2329	0.2059	0.2599	Yes	16.9022	0	0.23 (0.21 to 0.26)	Age-standardized
Incidence	Barbados	Both	Pancreatitis	4	1992	2021	-0.0805	-0.1236	-0.0374	Yes	-3.6586	0	-0.08 (-0.12 to -0.04)	Age-standardized
Incidence	Barbados	Female	Pancreatitis	5	1992	2021	-0.0688	-0.0988	-0.0387	Yes	-4.4866	0	-0.07 (-0.1 to -0.04)	Age-standardized
Incidence	Barbados	Male	Pancreatitis	4	1992	2021	-0.0759	-0.1575	0.0058	No	-1.8202	0.069	-0.08 (-0.16 to 0.01)	Age-standardized
Incidence	Belarus	Both	Pancreatitis	5	1992	2021	0.1116	0.0565	0.1668	Yes	3.9678	0	0.11 (0.06 to 0.17)	Age-standardized
Incidence	Belarus	Female	Pancreatitis	5	1992	2021	0.1523	0.0896	0.2149	Yes	4.7672	0	0.15 (0.09 to 0.21)	Age-standardized
Incidence	Belarus	Male	Pancreatitis	5	1992	2021	0.0562	-0.017	0.1295	No	1.5044	0.132	0.06 (-0.02 to 0.13)	Age-standardized
Incidence	Belgium	Both	Pancreatitis	3	1992	2021	-0.3211	-0.3425	-0.2996	Yes	-29.3295	0	-0.32 (-0.34 to -0.3)	Age-standardized
Incidence	Belgium	Female	Pancreatitis	5	1992	2021	-0.2441	-0.2704	-0.2178	Yes	-18.1709	0	-0.24 (-0.27 to -0.22)	Age-standardized
Incidence	Belgium	Male	Pancreatitis	5	1992	2021	-0.4109	-0.4265	-0.3952	Yes	-51.2454	0	-0.41 (-0.43 to -0.4)	Age-standardized
Incidence	Belize	Both	Pancreatitis	3	1992	2021	0.105	0.0897	0.1203	Yes	13.454	0	0.1 (0.09 to 0.12)	Age-standardized
Incidence	Belize	Female	Pancreatitis	5	1992	2021	0.1314	0.1088	0.1541	Yes	11.3809	0	0.13 (0.11 to 0.15)	Age-standardized
Incidence	Belize	Male	Pancreatitis	3	1992	2021	0.0513	-0.0039	0.1066	No	1.8214	0.069	0.05 (0 to 0.11)	Age-standardized
Incidence	Benin	Both	Pancreatitis	5	1992	2021	0.0717	0.0283	0.1152	Yes	3.2399	0.001	0.07 (0.03 to 0.12)	Age-standardized
Incidence	Benin	Female	Pancreatitis	5	1992	2021	0.0972	0.0666	0.1278	Yes	6.2295	0	0.1 (0.07 to 0.13)	Age-standardized
Incidence	Benin	Male	Pancreatitis	5	1992	2021	0.0713	0.0564	0.0861	Yes	9.3979	0	0.07 (0.06 to 0.09)	Age-standardized
Incidence	Bermuda	Both	Pancreatitis	5	1992	2021	-0.3244	-0.3415	-0.3073	Yes	-37.1592	0	-0.32 (-0.34 to -0.31)	Age-standardized
Incidence	Bermuda	Female	Pancreatitis	5	1992	2021	-0.2916	-0.3422	-0.2409	Yes	-11.2703	0	-0.29 (-0.34 to -0.24)	Age-standardized
Incidence	Bermuda	Male	Pancreatitis	5	1992	2021	-0.3577	-0.4562	-0.2592	Yes	-7.1045	0	-0.36 (-0.46 to -0.26)	Age-standardized
Incidence	Bhutan	Both	Pancreatitis	3	1992	2021	0.0233	0.0129	0.0337	Yes	4.3747	0	0.02 (0.01 to 0.03)	Age-standardized
Incidence	Bhutan	Female	Pancreatitis	5	1992	2021	0.0245	0.013	0.036	Yes	4.1695	0	0.02 (0.01 to 0.04)	Age-standardized
Incidence	Bhutan	Male	Pancreatitis	5	1992	2021	0.0553	0.014	0.0966	Yes	2.6266	0.009	0.06 (0.01 to 0.1)	Age-standardized
Incidence	Bolivia (Plurinational State of)	Both	Pancreatitis	5	1992	2021	-0.3381	-0.3518	-0.3244	Yes	-48.2732	0	-0.34 (-0.35 to -0.32)	Age-standardized
Incidence	Bolivia (Plurinational State of)	Female	Pancreatitis	5	1992	2021	-0.3354	-0.3417	-0.3291	Yes	-103.552	0	-0.34 (-0.34 to -0.33)	Age-standardized
Incidence	Bolivia (Plurinational State of)	Male	Pancreatitis	5	1992	2021	-0.3083	-0.3202	-0.2963	Yes	-50.4126	0	-0.31 (-0.32 to -0.3)	Age-standardized
Incidence	Bosnia and Herzegovina	Both	Pancreatitis	3	1992	2021	-0.0004	-0.0115	0.0107	No	-0.074	0.941	0 (-0.01 to 0.01)	Age-standardized
Incidence	Bosnia and Herzegovina	Female	Pancreatitis	3	1992	2021	-0.0187	-0.0338	-0.0037	Yes	-2.4389	0.015	-0.02 (-0.03 to 0)	Age-standardized
Incidence	Bosnia and Herzegovina	Male	Pancreatitis	4	1992	2021	0.0251	-0.0139	0.0642	No	1.2604	0.208	0.03 (-0.01 to 0.06)	Age-standardized
Incidence	Botswana	Both	Pancreatitis	4	1992	2021	-0.2294	-0.3068	-0.152	Yes	-5.801	0	-0.23 (-0.31 to -0.15)	Age-standardized
Incidence	Botswana	Female	Pancreatitis	4	1992	2021	-0.2013	-0.2683	-0.1344	Yes	-5.8885	0	-0.2 (-0.27 to -0.13)	Age-standardized
Incidence	Botswana	Male	Pancreatitis	4	1992	2021	-0.2221	-0.3178	-0.1262	Yes	-4.5384	0	-0.22 (-0.32 to -0.13)	Age-standardized
Incidence	Brazil	Both	Pancreatitis	5	1992	2021	-0.5329	-0.6275	-0.4381	Yes	-10.9987	0	-0.53 (-0.63 to -0.44)	Age-standardized
Incidence	Brazil	Female	Pancreatitis	5	1992	2021	0.0441	0.0234	0.0648	Yes	4.1768	0	0.04 (0.02 to 0.06)	Age-standardized
Incidence	Brazil	Male	Pancreatitis	4	1992	2021	-1.0978	-1.2241	-0.9713	Yes	-16.9285	0	-1.1 (-1.22 to -0.97)	Age-standardized
Incidence	Brunei Darussalam	Both	Pancreatitis	4	1992	2021	-0.0808	-0.106	-0.0556	Yes	-6.2833	0	-0.08 (-0.11 to -0.06)	Age-standardized
Incidence	Brunei Darussalam	Female	Pancreatitis	5	1992	2021	-0.0832	-0.098	-0.0684	Yes	-11.0159	0	-0.08 (-0.1 to -0.07)	Age-standardized
Incidence	Brunei Darussalam	Male	Pancreatitis	5	1992	2021	-0.0713	-0.0892	-0.0534	Yes	-7.7865	0	-0.07 (-0.09 to -0.05)	Age-standardized
Incidence	Bulgaria	Both	Pancreatitis	5	1992	2021	0.071	0.0512	0.0907	Yes	7.0548	0	0.07 (0.05 to 0.09)	Age-standardized
Incidence	Bulgaria	Female	Pancreatitis	5	1992	2021	0.0246	-0.0364	0.0855	No	0.7898	0.43	0.02 (-0.04 to 0.09)	Age-standardized
Incidence	Bulgaria	Male	Pancreatitis	5	1992	2021	0.1117	0.0861	0.1373	Yes	8.5616	0	0.11 (0.09 to 0.14)	Age-standardized
Incidence	Burkina Faso	Both	Pancreatitis	5	1992	2021	0.1259	0.0836	0.1682	Yes	5.8403	0	0.13 (0.08 to 0.17)	Age-standardized
Incidence	Burkina Faso	Female	Pancreatitis	4	1992	2021	0.1282	0.0774	0.179	Yes	4.9465	0	0.13 (0.08 to 0.18)	Age-standardized
Incidence	Burkina Faso	Male	Pancreatitis	5	1992	2021	0.1355	0.1219	0.1491	Yes	19.4939	0	0.14 (0.12 to 0.15)	Age-standardized
Incidence	Burundi	Both	Pancreatitis	5	1992	2021	-0.0466	-0.0782	-0.0149	Yes	-2.8806	0.004	-0.05 (-0.08 to -0.01)	Age-standardized
Incidence	Burundi	Female	Pancreatitis	4	1992	2021	0.02	-0.0547	0.0948	No	0.5248	0.6	0.02 (-0.05 to 0.09)	Age-standardized
Incidence	Burundi	Male	Pancreatitis	3	1992	2021	-0.1292	-0.1746	-0.0837	Yes	-5.5643	0	-0.13 (-0.17 to -0.08)	Age-standardized
Incidence	Cabo Verde	Both	Pancreatitis	3	1992	2021	0.034	-0.0087	0.0767	No	1.5604	0.119	0.03 (-0.01 to 0.08)	Age-standardized
Incidence	Cabo Verde	Female	Pancreatitis	2	1992	2021	0.0741	0.034	0.1143	Yes	3.6234	0	0.07 (0.03 to 0.11)	Age-standardized
Incidence	Cabo Verde	Male	Pancreatitis	2	1992	2021	0.0099	-0.0174	0.0371	No	0.7102	0.478	0.01 (-0.02 to 0.04)	Age-standardized
Incidence	Cambodia	Both	Pancreatitis	5	1992	2021	-0.0003	-0.0151	0.0144	No	-0.0441	0.965	0 (-0.02 to 0.01)	Age-standardized
Incidence	Cambodia	Female	Pancreatitis	3	1992	2021	0.0195	-0.006	0.0449	No	1.5011	0.133	0.02 (-0.01 to 0.04)	Age-standardized
Incidence	Cambodia	Male	Pancreatitis	4	1992	2021	-0.0204	-0.0488	0.0079	No	-1.4127	0.158	-0.02 (-0.05 to 0.01)	Age-standardized
Incidence	Cameroon	Both	Pancreatitis	3	1992	2021	-0.0323	-0.0753	0.0106	No	-1.4757	0.14	-0.03 (-0.08 to 0.01)	Age-standardized
Incidence	Cameroon	Female	Pancreatitis	2	1992	2021	0.0019	-0.0506	0.0545	No	0.0716	0.943	0 (-0.05 to 0.05)	Age-standardized
Incidence	Cameroon	Male	Pancreatitis	5	1992	2021	-0.0286	-0.041	-0.0162	Yes	-4.5229	0	-0.03 (-0.04 to -0.02)	Age-standardized
Incidence	Canada	Both	Pancreatitis	4	1992	2021	-0.0832	-0.0872	-0.0792	Yes	-40.9965	0	-0.08 (-0.09 to -0.08)	Age-standardized
Incidence	Canada	Female	Pancreatitis	2	1992	2021	-0.0867	-0.1138	-0.0595	Yes	-6.2597	0	-0.09 (-0.11 to -0.06)	Age-standardized
Incidence	Canada	Male	Pancreatitis	3	1992	2021	-0.0789	-0.1004	-0.0574	Yes	-7.1937	0	-0.08 (-0.1 to -0.06)	Age-standardized
Incidence	Central African Republic	Both	Pancreatitis	5	1992	2021	-0.1104	-0.1229	-0.0979	Yes	-17.2589	0	-0.11 (-0.12 to -0.1)	Age-standardized
Incidence	Central African Republic	Female	Pancreatitis	4	1992	2021	-0.1117	-0.1429	-0.0804	Yes	-6.9945	0	-0.11 (-0.14 to -0.08)	Age-standardized
Incidence	Central African Republic	Male	Pancreatitis	4	1992	2021	-0.1106	-0.1234	-0.0978	Yes	-16.8937	0	-0.11 (-0.12 to -0.1)	Age-standardized
Incidence	Chad	Both	Pancreatitis	3	1992	2021	-0.008	-0.0415	0.0255	No	-0.4685	0.639	-0.01 (-0.04 to 0.03)	Age-standardized
Incidence	Chad	Female	Pancreatitis	4	1992	2021	-0.003	-0.0342	0.0282	No	-0.1883	0.851	0 (-0.03 to 0.03)	Age-standardized
Incidence	Chad	Male	Pancreatitis	4	1992	2021	0.0133	-0.0155	0.0421	No	0.9079	0.364	0.01 (-0.02 to 0.04)	Age-standardized
Incidence	Chile	Both	Pancreatitis	5	1992	2021	1.701	1.6638	1.7382	Yes	90.3879	0	1.7 (1.66 to 1.74)	Age-standardized
Incidence	Chile	Female	Pancreatitis	5	1992	2021	1.8794	1.836	1.9229	Yes	85.5753	0	1.88 (1.84 to 1.92)	Age-standardized
Incidence	Chile	Male	Pancreatitis	5	1992	2021	1.4462	1.3662	1.5263	Yes	35.6486	0	1.45 (1.37 to 1.53)	Age-standardized
Incidence	China	Both	Pancreatitis	2	1992	2021	-1.746	-1.8815	-1.6103	Yes	-25.017	0	-1.75 (-1.88 to -1.61)	Age-standardized
Incidence	China	Female	Pancreatitis	2	1992	2021	-1.8244	-1.9775	-1.6711	Yes	-23.1275	0	-1.82 (-1.98 to -1.67)	Age-standardized
Incidence	China	Male	Pancreatitis	2	1992	2021	-1.6895	-1.7948	-1.5841	Yes	-31.1624	0	-1.69 (-1.79 to -1.58)	Age-standardized
Incidence	Colombia	Both	Pancreatitis	5	1992	2021	-0.2634	-0.2758	-0.251	Yes	-41.6018	0	-0.26 (-0.28 to -0.25)	Age-standardized
Incidence	Colombia	Female	Pancreatitis	4	1992	2021	-0.2648	-0.2884	-0.2411	Yes	-21.9192	0	-0.26 (-0.29 to -0.24)	Age-standardized
Incidence	Colombia	Male	Pancreatitis	5	1992	2021	-0.2631	-0.2723	-0.2539	Yes	-56.1516	0	-0.26 (-0.27 to -0.25)	Age-standardized
Incidence	Comoros	Both	Pancreatitis	5	1992	2021	-0.0807	-0.097	-0.0645	Yes	-9.7342	0	-0.08 (-0.1 to -0.06)	Age-standardized
Incidence	Comoros	Female	Pancreatitis	5	1992	2021	-0.0254	-0.0358	-0.0149	Yes	-4.7683	0	-0.03 (-0.04 to -0.01)	Age-standardized
Incidence	Comoros	Male	Pancreatitis	5	1992	2021	-0.1335	-0.1419	-0.1251	Yes	-31.2468	0	-0.13 (-0.14 to -0.13)	Age-standardized
Incidence	Congo	Both	Pancreatitis	5	1992	2021	-0.055	-0.0746	-0.0353	Yes	-5.4843	0	-0.06 (-0.07 to -0.04)	Age-standardized
Incidence	Congo	Female	Pancreatitis	5	1992	2021	-0.0619	-0.0867	-0.0371	Yes	-4.8885	0	-0.06 (-0.09 to -0.04)	Age-standardized
Incidence	Congo	Male	Pancreatitis	5	1992	2021	-0.0499	-0.0854	-0.0144	Yes	-2.7536	0.006	-0.05 (-0.09 to -0.01)	Age-standardized
Incidence	Cook Islands	Both	Pancreatitis	5	1992	2021	0.1179	0.1081	0.1276	Yes	23.6561	0	0.12 (0.11 to 0.13)	Age-standardized
Incidence	Cook Islands	Female	Pancreatitis	3	1992	2021	0.0876	0.035	0.1401	Yes	3.2686	0.001	0.09 (0.04 to 0.14)	Age-standardized
Incidence	Cook Islands	Male	Pancreatitis	5	1992	2021	0.1489	0.1328	0.165	Yes	18.1247	0	0.15 (0.13 to 0.16)	Age-standardized
Incidence	Costa Rica	Both	Pancreatitis	3	1992	2021	-0.166	-0.19	-0.142	Yes	-13.5331	0	-0.17 (-0.19 to -0.14)	Age-standardized
Incidence	Costa Rica	Female	Pancreatitis	3	1992	2021	-0.1705	-0.1977	-0.1433	Yes	-12.2707	0	-0.17 (-0.2 to -0.14)	Age-standardized
Incidence	Costa Rica	Male	Pancreatitis	4	1992	2021	-0.1719	-0.2034	-0.1405	Yes	-10.7025	0	-0.17 (-0.2 to -0.14)	Age-standardized
Incidence	Coted'Ivoire	Both	Pancreatitis	4	1992	2021	0.0912	0.0423	0.1401	Yes	3.656	0	0.09 (0.04 to 0.14)	Age-standardized
Incidence	Coted'Ivoire	Female	Pancreatitis	3	1992	2021	0.1144	0.0749	0.154	Yes	5.6725	0	0.11 (0.07 to 0.15)	Age-standardized
Incidence	Coted'Ivoire	Male	Pancreatitis	4	1992	2021	0.0578	0.0271	0.0884	Yes	3.6973	0	0.06 (0.03 to 0.09)	Age-standardized
Incidence	Croatia	Both	Pancreatitis	5	1992	2021	0.3216	0.2508	0.3926	Yes	8.9041	0	0.32 (0.25 to 0.39)	Age-standardized
Incidence	Croatia	Female	Pancreatitis	5	1992	2021	0.1472	0.1134	0.1809	Yes	8.555	0	0.15 (0.11 to 0.18)	Age-standardized
Incidence	Croatia	Male	Pancreatitis	5	1992	2021	0.508	0.4069	0.6091	Yes	9.8706	0	0.51 (0.41 to 0.61)	Age-standardized
Incidence	Cuba	Both	Pancreatitis	5	1992	2021	0.1026	0.0754	0.1299	Yes	7.393	0	0.1 (0.08 to 0.13)	Age-standardized
Incidence	Cuba	Female	Pancreatitis	4	1992	2021	0.1149	0.0945	0.1354	Yes	11.0214	0	0.11 (0.09 to 0.14)	Age-standardized
Incidence	Cuba	Male	Pancreatitis	4	1992	2021	0.0829	0.0485	0.1174	Yes	4.7213	0	0.08 (0.05 to 0.12)	Age-standardized
Incidence	Cyprus	Both	Pancreatitis	3	1992	2021	-0.8622	-0.9082	-0.8161	Yes	-36.5427	0	-0.86 (-0.91 to -0.82)	Age-standardized
Incidence	Cyprus	Female	Pancreatitis	4	1992	2021	-1.0297	-1.1068	-0.9525	Yes	-26.0307	0	-1.03 (-1.11 to -0.95)	Age-standardized
Incidence	Cyprus	Male	Pancreatitis	4	1992	2021	-0.6153	-0.6613	-0.5692	Yes	-26.1295	0	-0.62 (-0.66 to -0.57)	Age-standardized
Incidence	Czechia	Both	Pancreatitis	5	1992	2021	-0.5834	-0.6146	-0.5521	Yes	-36.4915	0	-0.58 (-0.61 to -0.55)	Age-standardized
Incidence	Czechia	Female	Pancreatitis	5	1992	2021	-0.6024	-0.6261	-0.5787	Yes	-49.5865	0	-0.6 (-0.63 to -0.58)	Age-standardized
Incidence	Czechia	Male	Pancreatitis	5	1992	2021	-0.557	-0.5931	-0.5209	Yes	-30.1364	0	-0.56 (-0.59 to -0.52)	Age-standardized
Incidence	Democratic People's Republic of Korea	Both	Pancreatitis	5	1992	2021	-0.0174	-0.0311	-0.0036	Yes	-2.4819	0.013	-0.02 (-0.03 to 0)	Age-standardized
Incidence	Democratic People's Republic of Korea	Female	Pancreatitis	2	1992	2021	-0.0018	-0.0257	0.0221	No	-0.147	0.883	0 (-0.03 to 0.02)	Age-standardized
Incidence	Democratic People's Republic of Korea	Male	Pancreatitis	5	1992	2021	-0.0786	-0.0885	-0.0686	Yes	-15.4795	0	-0.08 (-0.09 to -0.07)	Age-standardized
Incidence	Democratic Republic of the Congo	Both	Pancreatitis	5	1992	2021	-0.0537	-0.0753	-0.032	Yes	-4.8614	0	-0.05 (-0.08 to -0.03)	Age-standardized
Incidence	Democratic Republic of the Congo	Female	Pancreatitis	5	1992	2021	-0.0646	-0.1013	-0.028	Yes	-3.454	0.001	-0.06 (-0.1 to -0.03)	Age-standardized
Incidence	Democratic Republic of the Congo	Male	Pancreatitis	5	1992	2021	-0.044	-0.0559	-0.0321	Yes	-7.2415	0	-0.04 (-0.06 to -0.03)	Age-standardized
Incidence	Denmark	Both	Pancreatitis	5	1992	2021	-0.1215	-0.1408	-0.1023	Yes	-12.3692	0	-0.12 (-0.14 to -0.1)	Age-standardized
Incidence	Denmark	Female	Pancreatitis	5	1992	2021	-0.0249	-0.0595	0.0098	No	-1.4066	0.16	-0.02 (-0.06 to 0.01)	Age-standardized
Incidence	Denmark	Male	Pancreatitis	5	1992	2021	-0.2135	-0.2396	-0.1874	Yes	-15.9994	0	-0.21 (-0.24 to -0.19)	Age-standardized
Incidence	Djibouti	Both	Pancreatitis	4	1992	2021	-0.1933	-0.2192	-0.1674	Yes	-14.6243	0	-0.19 (-0.22 to -0.17)	Age-standardized
Incidence	Djibouti	Female	Pancreatitis	3	1992	2021	-0.1062	-0.1405	-0.072	Yes	-6.0813	0	-0.11 (-0.14 to -0.07)	Age-standardized
Incidence	Djibouti	Male	Pancreatitis	5	1992	2021	-0.271	-0.3161	-0.2258	Yes	-11.7421	0	-0.27 (-0.32 to -0.23)	Age-standardized
Incidence	Dominica	Both	Pancreatitis	4	1992	2021	0.0014	-0.0379	0.0406	No	0.0679	0.946	0 (-0.04 to 0.04)	Age-standardized
Incidence	Dominica	Female	Pancreatitis	5	1992	2021	0.0139	-0.0078	0.0357	No	1.254	0.21	0.01 (-0.01 to 0.04)	Age-standardized
Incidence	Dominica	Male	Pancreatitis	4	1992	2021	-0.0413	-0.0688	-0.0138	Yes	-2.9395	0.003	-0.04 (-0.07 to -0.01)	Age-standardized
Incidence	Dominican Republic	Both	Pancreatitis	4	1992	2021	-0.0155	-0.0323	0.0012	No	-1.8145	0.07	-0.02 (-0.03 to 0)	Age-standardized
Incidence	Dominican Republic	Female	Pancreatitis	5	1992	2021	0.005	-0.0093	0.0192	No	0.6846	0.494	0 (-0.01 to 0.02)	Age-standardized
Incidence	Dominican Republic	Male	Pancreatitis	5	1992	2021	-0.0201	-0.077	0.0369	No	-0.6904	0.49	-0.02 (-0.08 to 0.04)	Age-standardized
Incidence	Ecuador	Both	Pancreatitis	5	1992	2021	0.4982	0.2798	0.7172	Yes	4.4762	0	0.5 (0.28 to 0.72)	Age-standardized
Incidence	Ecuador	Female	Pancreatitis	5	1992	2021	0.8788	0.6755	1.0825	Yes	8.5017	0	0.88 (0.68 to 1.08)	Age-standardized
Incidence	Ecuador	Male	Pancreatitis	5	1992	2021	-0.0634	-0.1979	0.0713	No	-0.9232	0.356	-0.06 (-0.2 to 0.07)	Age-standardized
Incidence	Egypt	Both	Pancreatitis	5	1992	2021	0.0271	-0.0161	0.0703	No	1.2298	0.219	0.03 (-0.02 to 0.07)	Age-standardized
Incidence	Egypt	Female	Pancreatitis	4	1992	2021	0.0465	0.0087	0.0843	Yes	2.4123	0.016	0.05 (0.01 to 0.08)	Age-standardized
Incidence	Egypt	Male	Pancreatitis	5	1992	2021	0.0077	-0.0452	0.0607	No	0.2851	0.776	0.01 (-0.05 to 0.06)	Age-standardized
Incidence	El Salvador	Both	Pancreatitis	5	1992	2021	-0.2477	-0.2655	-0.2299	Yes	-27.2521	0	-0.25 (-0.27 to -0.23)	Age-standardized
Incidence	El Salvador	Female	Pancreatitis	5	1992	2021	-0.2604	-0.2736	-0.2472	Yes	-38.6461	0	-0.26 (-0.27 to -0.25)	Age-standardized
Incidence	El Salvador	Male	Pancreatitis	5	1992	2021	-0.2219	-0.2316	-0.2121	Yes	-44.5535	0	-0.22 (-0.23 to -0.21)	Age-standardized
Incidence	Equatorial Guinea	Both	Pancreatitis	2	1992	2021	-0.03	-0.0459	-0.014	Yes	-3.6869	0	-0.03 (-0.05 to -0.01)	Age-standardized
Incidence	Equatorial Guinea	Female	Pancreatitis	2	1992	2021	0.0041	-0.0168	0.025	No	0.3843	0.701	0 (-0.02 to 0.03)	Age-standardized
Incidence	Equatorial Guinea	Male	Pancreatitis	3	1992	2021	0.0013	-0.0089	0.0115	No	0.2471	0.805	0 (-0.01 to 0.01)	Age-standardized
Incidence	Eritrea	Both	Pancreatitis	4	1992	2021	-0.0392	-0.0891	0.0108	No	-1.5369	0.124	-0.04 (-0.09 to 0.01)	Age-standardized
Incidence	Eritrea	Female	Pancreatitis	3	1992	2021	0.0302	-0.024	0.0844	No	1.093	0.274	0.03 (-0.02 to 0.08)	Age-standardized
Incidence	Eritrea	Male	Pancreatitis	4	1992	2021	-0.1217	-0.1407	-0.1028	Yes	-12.555	0	-0.12 (-0.14 to -0.1)	Age-standardized
Incidence	Estonia	Both	Pancreatitis	5	1992	2021	0.075	0.0431	0.1068	Yes	4.61	0	0.07 (0.04 to 0.11)	Age-standardized
Incidence	Estonia	Female	Pancreatitis	5	1992	2021	0.0491	0.0178	0.0804	Yes	3.072	0.002	0.05 (0.02 to 0.08)	Age-standardized
Incidence	Estonia	Male	Pancreatitis	5	1992	2021	0.0906	0.0404	0.1408	Yes	3.5404	0	0.09 (0.04 to 0.14)	Age-standardized
Incidence	Eswatini	Both	Pancreatitis	3	1992	2021	-0.0508	-0.0723	-0.0293	Yes	-4.6257	0	-0.05 (-0.07 to -0.03)	Age-standardized
Incidence	Eswatini	Female	Pancreatitis	4	1992	2021	-0.0512	-0.0824	-0.02	Yes	-3.2134	0.001	-0.05 (-0.08 to -0.02)	Age-standardized
Incidence	Eswatini	Male	Pancreatitis	5	1992	2021	-0.0332	-0.0462	-0.0202	Yes	-5.0048	0	-0.03 (-0.05 to -0.02)	Age-standardized
Incidence	Ethiopia	Both	Pancreatitis	5	1992	2021	-0.064	-0.1093	-0.0187	Yes	-2.7696	0.006	-0.06 (-0.11 to -0.02)	Age-standardized
Incidence	Ethiopia	Female	Pancreatitis	5	1992	2021	0.032	-0.0111	0.0752	No	1.4543	0.146	0.03 (-0.01 to 0.08)	Age-standardized
Incidence	Ethiopia	Male	Pancreatitis	5	1992	2021	-0.1658	-0.1745	-0.157	Yes	-36.902	0	-0.17 (-0.17 to -0.16)	Age-standardized
Incidence	Fiji	Both	Pancreatitis	4	1992	2021	-0.1442	-0.1627	-0.1257	Yes	-15.2612	0	-0.14 (-0.16 to -0.13)	Age-standardized
Incidence	Fiji	Female	Pancreatitis	4	1992	2021	-0.1699	-0.2249	-0.115	Yes	-6.0556	0	-0.17 (-0.22 to -0.12)	Age-standardized
Incidence	Fiji	Male	Pancreatitis	4	1992	2021	-0.1293	-0.1543	-0.1043	Yes	-10.1235	0	-0.13 (-0.15 to -0.1)	Age-standardized
Incidence	Finland	Both	Pancreatitis	5	1992	2021	0.0433	0.03	0.0567	Yes	6.3537	0	0.04 (0.03 to 0.06)	Age-standardized
Incidence	Finland	Female	Pancreatitis	4	1992	2021	-0.054	-0.0721	-0.0359	Yes	-5.8547	0	-0.05 (-0.07 to -0.04)	Age-standardized
Incidence	Finland	Male	Pancreatitis	5	1992	2021	0.1478	0.1204	0.1752	Yes	10.5781	0	0.15 (0.12 to 0.18)	Age-standardized
Incidence	France	Both	Pancreatitis	5	1992	2021	-0.3627	-0.3817	-0.3437	Yes	-37.3004	0	-0.36 (-0.38 to -0.34)	Age-standardized
Incidence	France	Female	Pancreatitis	3	1992	2021	-0.3577	-0.3867	-0.3288	Yes	-24.1993	0	-0.36 (-0.39 to -0.33)	Age-standardized
Incidence	France	Male	Pancreatitis	4	1992	2021	-0.37	-0.4022	-0.3377	Yes	-22.4129	0	-0.37 (-0.4 to -0.34)	Age-standardized
Incidence	Gabon	Both	Pancreatitis	5	1992	2021	-0.1339	-0.1441	-0.1237	Yes	-25.69	0	-0.13 (-0.14 to -0.12)	Age-standardized
Incidence	Gabon	Female	Pancreatitis	5	1992	2021	-0.1432	-0.1543	-0.1321	Yes	-25.2841	0	-0.14 (-0.15 to -0.13)	Age-standardized
Incidence	Gabon	Male	Pancreatitis	5	1992	2021	-0.1451	-0.1793	-0.111	Yes	-8.3203	0	-0.15 (-0.18 to -0.11)	Age-standardized
Incidence	Gambia	Both	Pancreatitis	2	1992	2021	-0.0644	-0.1001	-0.0286	Yes	-3.527	0	-0.06 (-0.1 to -0.03)	Age-standardized
Incidence	Gambia	Female	Pancreatitis	2	1992	2021	-0.0391	-0.0978	0.0196	No	-1.3057	0.192	-0.04 (-0.1 to 0.02)	Age-standardized
Incidence	Gambia	Male	Pancreatitis	3	1992	2021	-0.0686	-0.0794	-0.0579	Yes	-12.4958	0	-0.07 (-0.08 to -0.06)	Age-standardized
Incidence	Georgia	Both	Pancreatitis	4	1992	2021	-0.3847	-0.4965	-0.2728	Yes	-6.7264	0	-0.38 (-0.5 to -0.27)	Age-standardized
Incidence	Georgia	Female	Pancreatitis	4	1992	2021	-0.7227	-0.8761	-0.5691	Yes	-9.1923	0	-0.72 (-0.88 to -0.57)	Age-standardized
Incidence	Georgia	Male	Pancreatitis	4	1992	2021	-0.1498	-0.2721	-0.0273	Yes	-2.3959	0.017	-0.15 (-0.27 to -0.03)	Age-standardized
Incidence	Germany	Both	Pancreatitis	4	1992	2021	-0.0098	-0.079	0.0595	No	-0.2763	0.782	-0.01 (-0.08 to 0.06)	Age-standardized
Incidence	Germany	Female	Pancreatitis	3	1992	2021	-0.0445	-0.1533	0.0644	No	-0.8019	0.423	-0.04 (-0.15 to 0.06)	Age-standardized
Incidence	Germany	Male	Pancreatitis	4	1992	2021	0.0411	0.0081	0.0741	Yes	2.4379	0.015	0.04 (0.01 to 0.07)	Age-standardized
Incidence	Ghana	Both	Pancreatitis	5	1992	2021	0.0324	-0.0035	0.0683	No	1.771	0.077	0.03 (0 to 0.07)	Age-standardized
Incidence	Ghana	Female	Pancreatitis	5	1992	2021	0.0376	-0.0126	0.0878	No	1.4682	0.142	0.04 (-0.01 to 0.09)	Age-standardized
Incidence	Ghana	Male	Pancreatitis	5	1992	2021	0.0203	-0.0247	0.0653	No	0.8827	0.377	0.02 (-0.02 to 0.07)	Age-standardized
Incidence	Global	Both	Pancreatitis	4	1992	2021	0.1276	0.1153	0.1398	Yes	20.4294	0	0.13 (0.12 to 0.14)	Age-standardized
Incidence	Global	Female	Pancreatitis	5	1992	2021	0.1964	0.1762	0.2166	Yes	19.0661	0	0.2 (0.18 to 0.22)	Age-standardized
Incidence	Global	Male	Pancreatitis	5	1992	2021	0.0573	0.0459	0.0688	Yes	9.8384	0	0.06 (0.05 to 0.07)	Age-standardized
Incidence	Greece	Both	Pancreatitis	4	1992	2021	0.0452	-0.0078	0.0981	No	1.6717	0.095	0.05 (-0.01 to 0.1)	Age-standardized
Incidence	Greece	Female	Pancreatitis	5	1992	2021	-0.3749	-0.4259	-0.3238	Yes	-14.3708	0	-0.37 (-0.43 to -0.32)	Age-standardized
Incidence	Greece	Male	Pancreatitis	5	1992	2021	0.4411	0.2889	0.5934	Yes	5.6912	0	0.44 (0.29 to 0.59)	Age-standardized
Incidence	Greenland	Both	Pancreatitis	5	1992	2021	-0.1138	-0.155	-0.0727	Yes	-5.4202	0	-0.11 (-0.16 to -0.07)	Age-standardized
Incidence	Greenland	Female	Pancreatitis	5	1992	2021	-0.1303	-0.1593	-0.1014	Yes	-8.8269	0	-0.13 (-0.16 to -0.1)	Age-standardized
Incidence	Greenland	Male	Pancreatitis	4	1992	2021	-0.1296	-0.1575	-0.1017	Yes	-9.1025	0	-0.13 (-0.16 to -0.1)	Age-standardized
Incidence	Grenada	Both	Pancreatitis	3	1992	2021	-0.2183	-0.2539	-0.1826	Yes	-11.9946	0	-0.22 (-0.25 to -0.18)	Age-standardized
Incidence	Grenada	Female	Pancreatitis	4	1992	2021	-0.2024	-0.2358	-0.169	Yes	-11.8765	0	-0.2 (-0.24 to -0.17)	Age-standardized
Incidence	Grenada	Male	Pancreatitis	5	1992	2021	-0.2139	-0.2949	-0.1328	Yes	-5.1683	0	-0.21 (-0.29 to -0.13)	Age-standardized
Incidence	Guam	Both	Pancreatitis	3	1992	2021	-0.0169	-0.0323	-0.0014	Yes	-2.1416	0.032	-0.02 (-0.03 to 0)	Age-standardized
Incidence	Guam	Female	Pancreatitis	5	1992	2021	-0.0229	-0.0349	-0.0109	Yes	-3.7391	0	-0.02 (-0.03 to -0.01)	Age-standardized
Incidence	Guam	Male	Pancreatitis	3	1992	2021	-0.0053	-0.0346	0.024	No	-0.3551	0.723	-0.01 (-0.03 to 0.02)	Age-standardized
Incidence	Guatemala	Both	Pancreatitis	5	1992	2021	-0.3024	-0.328	-0.2769	Yes	-23.148	0	-0.3 (-0.33 to -0.28)	Age-standardized
Incidence	Guatemala	Female	Pancreatitis	5	1992	2021	-0.3104	-0.3316	-0.2891	Yes	-28.6274	0	-0.31 (-0.33 to -0.29)	Age-standardized
Incidence	Guatemala	Male	Pancreatitis	4	1992	2021	-0.2883	-0.3183	-0.2582	Yes	-18.7556	0	-0.29 (-0.32 to -0.26)	Age-standardized
Incidence	Guinea	Both	Pancreatitis	3	1992	2021	-0.0378	-0.0728	-0.0028	Yes	-2.1168	0.034	-0.04 (-0.07 to 0)	Age-standardized
Incidence	Guinea	Female	Pancreatitis	3	1992	2021	-0.0014	-0.0724	0.0696	No	-0.0389	0.969	0 (-0.07 to 0.07)	Age-standardized
Incidence	Guinea	Male	Pancreatitis	5	1992	2021	-0.0559	-0.0803	-0.0316	Yes	-4.5034	0	-0.06 (-0.08 to -0.03)	Age-standardized
Incidence	Guinea-Bissau	Both	Pancreatitis	5	1992	2021	-0.1346	-0.1506	-0.1186	Yes	-16.4776	0	-0.13 (-0.15 to -0.12)	Age-standardized
Incidence	Guinea-Bissau	Female	Pancreatitis	5	1992	2021	-0.1286	-0.1471	-0.1101	Yes	-13.6331	0	-0.13 (-0.15 to -0.11)	Age-standardized
Incidence	Guinea-Bissau	Male	Pancreatitis	3	1992	2021	-0.1467	-0.1707	-0.1228	Yes	-11.9994	0	-0.15 (-0.17 to -0.12)	Age-standardized
Incidence	Guyana	Both	Pancreatitis	3	1992	2021	-0.0843	-0.1337	-0.0349	Yes	-3.3422	0.001	-0.08 (-0.13 to -0.03)	Age-standardized
Incidence	Guyana	Female	Pancreatitis	2	1992	2021	-0.0538	-0.0815	-0.026	Yes	-3.8004	0	-0.05 (-0.08 to -0.03)	Age-standardized
Incidence	Guyana	Male	Pancreatitis	3	1992	2021	-0.1129	-0.1804	-0.0454	Yes	-3.278	0.001	-0.11 (-0.18 to -0.05)	Age-standardized
Incidence	Haiti	Both	Pancreatitis	4	1992	2021	-0.0218	-0.0727	0.0291	No	-0.8391	0.401	-0.02 (-0.07 to 0.03)	Age-standardized
Incidence	Haiti	Female	Pancreatitis	3	1992	2021	0.002	-0.0369	0.0409	No	0.1017	0.919	0 (-0.04 to 0.04)	Age-standardized
Incidence	Haiti	Male	Pancreatitis	4	1992	2021	-0.0245	-0.1042	0.0554	No	-0.6005	0.548	-0.02 (-0.1 to 0.06)	Age-standardized
Incidence	Honduras	Both	Pancreatitis	4	1992	2021	-0.0346	-0.0466	-0.0226	Yes	-5.6358	0	-0.03 (-0.05 to -0.02)	Age-standardized
Incidence	Honduras	Female	Pancreatitis	5	1992	2021	-0.0328	-0.07	0.0045	No	-1.7228	0.085	-0.03 (-0.07 to 0)	Age-standardized
Incidence	Honduras	Male	Pancreatitis	4	1992	2021	-0.039	-0.0488	-0.0293	Yes	-7.834	0	-0.04 (-0.05 to -0.03)	Age-standardized
Incidence	Hungary	Both	Pancreatitis	5	1992	2021	-0.4819	-0.532	-0.4318	Yes	-18.816	0	-0.48 (-0.53 to -0.43)	Age-standardized
Incidence	Hungary	Female	Pancreatitis	5	1992	2021	-0.5124	-0.538	-0.4868	Yes	-39.1395	0	-0.51 (-0.54 to -0.49)	Age-standardized
Incidence	Hungary	Male	Pancreatitis	4	1992	2021	-0.4431	-0.4693	-0.4168	Yes	-32.9552	0	-0.44 (-0.47 to -0.42)	Age-standardized
Incidence	Iceland	Both	Pancreatitis	4	1992	2021	-0.1003	-0.1169	-0.0838	Yes	-11.8687	0	-0.1 (-0.12 to -0.08)	Age-standardized
Incidence	Iceland	Female	Pancreatitis	3	1992	2021	-0.277	-0.3262	-0.2278	Yes	-11.0223	0	-0.28 (-0.33 to -0.23)	Age-standardized
Incidence	Iceland	Male	Pancreatitis	3	1992	2021	0.0726	0.0352	0.11	Yes	3.8069	0	0.07 (0.04 to 0.11)	Age-standardized
Incidence	India	Both	Pancreatitis	4	1992	2021	1.0704	1.035	1.1058	Yes	59.5286	0	1.07 (1.03 to 1.11)	Age-standardized
Incidence	India	Female	Pancreatitis	4	1992	2021	1.1954	1.148	1.2428	Yes	49.7241	0	1.2 (1.15 to 1.24)	Age-standardized
Incidence	India	Male	Pancreatitis	4	1992	2021	0.9602	0.9095	1.0109	Yes	37.2973	0	0.96 (0.91 to 1.01)	Age-standardized
Incidence	Indonesia	Both	Pancreatitis	2	1992	2021	-0.0591	-0.0696	-0.0486	Yes	-11.0565	0	-0.06 (-0.07 to -0.05)	Age-standardized
Incidence	Indonesia	Female	Pancreatitis	5	1992	2021	-0.0076	-0.0146	-0.0006	Yes	-2.1207	0.034	-0.01 (-0.01 to 0)	Age-standardized
Incidence	Indonesia	Male	Pancreatitis	3	1992	2021	-0.1284	-0.1524	-0.1043	Yes	-10.4735	0	-0.13 (-0.15 to -0.1)	Age-standardized
Incidence	Iran (Islamic Republic of)	Both	Pancreatitis	5	1992	2021	0.0597	0.0496	0.0698	Yes	11.5931	0	0.06 (0.05 to 0.07)	Age-standardized
Incidence	Iran (Islamic Republic of)	Female	Pancreatitis	5	1992	2021	0.1931	0.1712	0.215	Yes	17.2852	0	0.19 (0.17 to 0.22)	Age-standardized
Incidence	Iran (Islamic Republic of)	Male	Pancreatitis	5	1992	2021	-0.0532	-0.0843	-0.0222	Yes	-3.3582	0.001	-0.05 (-0.08 to -0.02)	Age-standardized
Incidence	Iraq	Both	Pancreatitis	5	1992	2021	-0.2763	-0.2877	-0.2648	Yes	-47.1793	0	-0.28 (-0.29 to -0.26)	Age-standardized
Incidence	Iraq	Female	Pancreatitis	4	1992	2021	-0.2681	-0.2867	-0.2495	Yes	-28.2545	0	-0.27 (-0.29 to -0.25)	Age-standardized
Incidence	Iraq	Male	Pancreatitis	5	1992	2021	-0.279	-0.2966	-0.2614	Yes	-31.0844	0	-0.28 (-0.3 to -0.26)	Age-standardized
Incidence	Ireland	Both	Pancreatitis	2	1992	2021	0.1773	0.089	0.2657	Yes	3.9373	0	0.18 (0.09 to 0.27)	Age-standardized
Incidence	Ireland	Female	Pancreatitis	3	1992	2021	0.7552	0.6676	0.8429	Yes	16.9505	0	0.76 (0.67 to 0.84)	Age-standardized
Incidence	Ireland	Male	Pancreatitis	2	1992	2021	-0.4253	-0.5022	-0.3483	Yes	-10.8064	0	-0.43 (-0.5 to -0.35)	Age-standardized
Incidence	Israel	Both	Pancreatitis	3	1992	2021	-0.1444	-0.1648	-0.1239	Yes	-13.8365	0	-0.14 (-0.16 to -0.12)	Age-standardized
Incidence	Israel	Female	Pancreatitis	3	1992	2021	-0.1572	-0.1762	-0.1381	Yes	-16.1797	0	-0.16 (-0.18 to -0.14)	Age-standardized
Incidence	Israel	Male	Pancreatitis	4	1992	2021	-0.1294	-0.172	-0.0869	Yes	-5.9546	0	-0.13 (-0.17 to -0.09)	Age-standardized
Incidence	Italy	Both	Pancreatitis	4	1992	2021	0.2847	0.1969	0.3725	Yes	6.3609	0	0.28 (0.2 to 0.37)	Age-standardized
Incidence	Italy	Female	Pancreatitis	5	1992	2021	0.2707	0.1877	0.3538	Yes	6.3992	0	0.27 (0.19 to 0.35)	Age-standardized
Incidence	Italy	Male	Pancreatitis	4	1992	2021	0.2919	0.2075	0.3764	Yes	6.7851	0	0.29 (0.21 to 0.38)	Age-standardized
Incidence	Jamaica	Both	Pancreatitis	4	1992	2021	-0.0888	-0.1379	-0.0396	Yes	-3.539	0	-0.09 (-0.14 to -0.04)	Age-standardized
Incidence	Jamaica	Female	Pancreatitis	4	1992	2021	-0.0612	-0.0847	-0.0378	Yes	-5.1188	0	-0.06 (-0.08 to -0.04)	Age-standardized
Incidence	Jamaica	Male	Pancreatitis	5	1992	2021	-0.1121	-0.2083	-0.0157	Yes	-2.279	0.023	-0.11 (-0.21 to -0.02)	Age-standardized
Incidence	Japan	Both	Pancreatitis	3	1992	2021	-0.2902	-0.3312	-0.2493	Yes	-13.8697	0	-0.29 (-0.33 to -0.25)	Age-standardized
Incidence	Japan	Female	Pancreatitis	2	1992	2021	-0.3503	-0.3798	-0.3208	Yes	-23.2065	0	-0.35 (-0.38 to -0.32)	Age-standardized
Incidence	Japan	Male	Pancreatitis	4	1992	2021	-0.2204	-0.2819	-0.1588	Yes	-7.0087	0	-0.22 (-0.28 to -0.16)	Age-standardized
Incidence	Jordan	Both	Pancreatitis	4	1992	2021	0.5854	0.5297	0.6411	Yes	20.6671	0	0.59 (0.53 to 0.64)	Age-standardized
Incidence	Jordan	Female	Pancreatitis	4	1992	2021	0.5038	0.4445	0.5632	Yes	16.6921	0	0.5 (0.44 to 0.56)	Age-standardized
Incidence	Jordan	Male	Pancreatitis	4	1992	2021	0.6311	0.5544	0.7078	Yes	16.1797	0	0.63 (0.55 to 0.71)	Age-standardized
Incidence	Kazakhstan	Both	Pancreatitis	3	1992	2021	-0.1343	-0.166	-0.1027	Yes	-8.3142	0	-0.13 (-0.17 to -0.1)	Age-standardized
Incidence	Kazakhstan	Female	Pancreatitis	4	1992	2021	-0.1334	-0.1911	-0.0756	Yes	-4.521	0	-0.13 (-0.19 to -0.08)	Age-standardized
Incidence	Kazakhstan	Male	Pancreatitis	5	1992	2021	-0.1376	-0.1828	-0.0923	Yes	-5.9489	0	-0.14 (-0.18 to -0.09)	Age-standardized
Incidence	Kenya	Both	Pancreatitis	5	1992	2021	0.011	-0.009	0.031	No	1.0809	0.28	0.01 (-0.01 to 0.03)	Age-standardized
Incidence	Kenya	Female	Pancreatitis	5	1992	2021	0.1386	0.0997	0.1776	Yes	6.986	0	0.14 (0.1 to 0.18)	Age-standardized
Incidence	Kenya	Male	Pancreatitis	5	1992	2021	-0.145	-0.1746	-0.1155	Yes	-9.6173	0	-0.14 (-0.17 to -0.12)	Age-standardized
Incidence	Kiribati	Both	Pancreatitis	2	1992	2021	0.0169	0.0061	0.0278	Yes	3.072	0.002	0.02 (0.01 to 0.03)	Age-standardized
Incidence	Kiribati	Female	Pancreatitis	5	1992	2021	-0.0036	-0.021	0.0137	No	-0.4099	0.682	0 (-0.02 to 0.01)	Age-standardized
Incidence	Kiribati	Male	Pancreatitis	5	1992	2021	0.0421	0.027	0.0572	Yes	5.4619	0	0.04 (0.03 to 0.06)	Age-standardized
Incidence	Kuwait	Both	Pancreatitis	5	1992	2021	-0.0763	-0.0935	-0.0591	Yes	-8.7039	0	-0.08 (-0.09 to -0.06)	Age-standardized
Incidence	Kuwait	Female	Pancreatitis	5	1992	2021	-0.0588	-0.0773	-0.0402	Yes	-6.2197	0	-0.06 (-0.08 to -0.04)	Age-standardized
Incidence	Kuwait	Male	Pancreatitis	5	1992	2021	-0.0828	-0.1117	-0.0538	Yes	-5.6037	0	-0.08 (-0.11 to -0.05)	Age-standardized
Incidence	Kyrgyzstan	Both	Pancreatitis	3	1992	2021	0.0914	0.0444	0.1386	Yes	3.8067	0	0.09 (0.04 to 0.14)	Age-standardized
Incidence	Kyrgyzstan	Female	Pancreatitis	3	1992	2021	0.0952	0.0069	0.1835	Yes	2.1122	0.035	0.1 (0.01 to 0.18)	Age-standardized
Incidence	Kyrgyzstan	Male	Pancreatitis	4	1992	2021	0.0843	0.0515	0.1172	Yes	5.0357	0	0.08 (0.05 to 0.12)	Age-standardized
Incidence	Lao People's Democratic Republic	Both	Pancreatitis	5	1992	2021	0.0557	0.0287	0.0827	Yes	4.041	0	0.06 (0.03 to 0.08)	Age-standardized
Incidence	Lao People's Democratic Republic	Female	Pancreatitis	4	1992	2021	0.0614	0.0235	0.0993	Yes	3.1724	0.002	0.06 (0.02 to 0.1)	Age-standardized
Incidence	Lao People's Democratic Republic	Male	Pancreatitis	5	1992	2021	0.0309	0.0245	0.0372	Yes	9.5671	0	0.03 (0.02 to 0.04)	Age-standardized
Incidence	Latvia	Both	Pancreatitis	5	1992	2021	0.2904	0.2522	0.3287	Yes	14.9032	0	0.29 (0.25 to 0.33)	Age-standardized
Incidence	Latvia	Female	Pancreatitis	4	1992	2021	0.2416	0.2115	0.2717	Yes	15.7718	0	0.24 (0.21 to 0.27)	Age-standardized
Incidence	Latvia	Male	Pancreatitis	5	1992	2021	0.3242	0.2982	0.3502	Yes	24.4461	0	0.32 (0.3 to 0.35)	Age-standardized
Incidence	Lebanon	Both	Pancreatitis	5	1992	2021	-0.1077	-0.1201	-0.0953	Yes	-16.993	0	-0.11 (-0.12 to -0.1)	Age-standardized
Incidence	Lebanon	Female	Pancreatitis	5	1992	2021	-0.0928	-0.1136	-0.0721	Yes	-8.7688	0	-0.09 (-0.11 to -0.07)	Age-standardized
Incidence	Lebanon	Male	Pancreatitis	5	1992	2021	-0.134	-0.1559	-0.1122	Yes	-12.0325	0	-0.13 (-0.16 to -0.11)	Age-standardized
Incidence	Lesotho	Both	Pancreatitis	5	1992	2021	0.0141	-0.0498	0.078	No	0.432	0.666	0.01 (-0.05 to 0.08)	Age-standardized
Incidence	Lesotho	Female	Pancreatitis	5	1992	2021	0.0395	0.0009	0.0782	Yes	2.005	0.045	0.04 (0 to 0.08)	Age-standardized
Incidence	Lesotho	Male	Pancreatitis	5	1992	2021	0.003	-0.0282	0.0343	No	0.1902	0.849	0 (-0.03 to 0.03)	Age-standardized
Incidence	Liberia	Both	Pancreatitis	5	1992	2021	0.0386	-0.0152	0.0924	No	1.4069	0.159	0.04 (-0.02 to 0.09)	Age-standardized
Incidence	Liberia	Female	Pancreatitis	4	1992	2021	0.0576	-0.0153	0.1306	No	1.5487	0.121	0.06 (-0.02 to 0.13)	Age-standardized
Incidence	Liberia	Male	Pancreatitis	5	1992	2021	0.0283	-0.0348	0.0913	No	0.8786	0.38	0.03 (-0.03 to 0.09)	Age-standardized
Incidence	Libya	Both	Pancreatitis	4	1992	2021	-0.0475	-0.0765	-0.0185	Yes	-3.2115	0.001	-0.05 (-0.08 to -0.02)	Age-standardized
Incidence	Libya	Female	Pancreatitis	4	1992	2021	-0.0463	-0.1176	0.0252	No	-1.2693	0.204	-0.05 (-0.12 to 0.03)	Age-standardized
Incidence	Libya	Male	Pancreatitis	4	1992	2021	-0.0491	-0.0725	-0.0256	Yes	-4.1023	0	-0.05 (-0.07 to -0.03)	Age-standardized
Incidence	Lithuania	Both	Pancreatitis	5	1992	2021	0.2827	0.2155	0.3499	Yes	8.2591	0	0.28 (0.22 to 0.35)	Age-standardized
Incidence	Lithuania	Female	Pancreatitis	5	1992	2021	0.3276	0.2758	0.3795	Yes	12.4023	0	0.33 (0.28 to 0.38)	Age-standardized
Incidence	Lithuania	Male	Pancreatitis	5	1992	2021	0.253	0.1902	0.3158	Yes	7.9035	0	0.25 (0.19 to 0.32)	Age-standardized
Incidence	Luxembourg	Both	Pancreatitis	5	1992	2021	-0.6578	-0.6878	-0.6277	Yes	-42.7342	0	-0.66 (-0.69 to -0.63)	Age-standardized
Incidence	Luxembourg	Female	Pancreatitis	5	1992	2021	-0.2029	-0.2333	-0.1725	Yes	-13.0585	0	-0.2 (-0.23 to -0.17)	Age-standardized
Incidence	Luxembourg	Male	Pancreatitis	5	1992	2021	-1.1219	-1.1645	-1.0793	Yes	-51.3241	0	-1.12 (-1.16 to -1.08)	Age-standardized
Incidence	Madagascar	Both	Pancreatitis	3	1992	2021	0.1083	0.0861	0.1306	Yes	9.542	0	0.11 (0.09 to 0.13)	Age-standardized
Incidence	Madagascar	Female	Pancreatitis	2	1992	2021	0.1592	0.0977	0.2208	Yes	5.0729	0	0.16 (0.1 to 0.22)	Age-standardized
Incidence	Madagascar	Male	Pancreatitis	3	1992	2021	0.0436	0.0106	0.0766	Yes	2.5866	0.01	0.04 (0.01 to 0.08)	Age-standardized
Incidence	Malawi	Both	Pancreatitis	4	1992	2021	0.1161	0.0957	0.1365	Yes	11.1549	0	0.12 (0.1 to 0.14)	Age-standardized
Incidence	Malawi	Female	Pancreatitis	3	1992	2021	0.1665	0.1096	0.2234	Yes	5.7349	0	0.17 (0.11 to 0.22)	Age-standardized
Incidence	Malawi	Male	Pancreatitis	4	1992	2021	0.0454	-0.0027	0.0935	No	1.8509	0.064	0.05 (0 to 0.09)	Age-standardized
Incidence	Malaysia	Both	Pancreatitis	4	1992	2021	-0.1089	-0.1418	-0.076	Yes	-6.4846	0	-0.11 (-0.14 to -0.08)	Age-standardized
Incidence	Malaysia	Female	Pancreatitis	3	1992	2021	-0.086	-0.1171	-0.055	Yes	-5.4267	0	-0.09 (-0.12 to -0.06)	Age-standardized
Incidence	Malaysia	Male	Pancreatitis	3	1992	2021	-0.1389	-0.1605	-0.1174	Yes	-12.6178	0	-0.14 (-0.16 to -0.12)	Age-standardized
Incidence	Maldives	Both	Pancreatitis	3	1992	2021	-0.1902	-0.2101	-0.1703	Yes	-18.7117	0	-0.19 (-0.21 to -0.17)	Age-standardized
Incidence	Maldives	Female	Pancreatitis	3	1992	2021	-0.2232	-0.2538	-0.1926	Yes	-14.2748	0	-0.22 (-0.25 to -0.19)	Age-standardized
Incidence	Maldives	Male	Pancreatitis	5	1992	2021	-0.2205	-0.2675	-0.1735	Yes	-9.1808	0	-0.22 (-0.27 to -0.17)	Age-standardized
Incidence	Mali	Both	Pancreatitis	4	1992	2021	0.1367	0.0995	0.1739	Yes	7.214	0	0.14 (0.1 to 0.17)	Age-standardized
Incidence	Mali	Female	Pancreatitis	5	1992	2021	0.1465	0.0939	0.1992	Yes	5.4586	0	0.15 (0.09 to 0.2)	Age-standardized
Incidence	Mali	Male	Pancreatitis	4	1992	2021	0.1225	0.0982	0.1469	Yes	9.8737	0	0.12 (0.1 to 0.15)	Age-standardized
Incidence	Malta	Both	Pancreatitis	4	1992	2021	-0.1439	-0.1653	-0.1224	Yes	-13.1089	0	-0.14 (-0.17 to -0.12)	Age-standardized
Incidence	Malta	Female	Pancreatitis	3	1992	2021	-0.0626	-0.1001	-0.0252	Yes	-3.2761	0.001	-0.06 (-0.1 to -0.03)	Age-standardized
Incidence	Malta	Male	Pancreatitis	3	1992	2021	-0.2542	-0.2744	-0.2341	Yes	-24.7016	0	-0.25 (-0.27 to -0.23)	Age-standardized
Incidence	Marshall Islands	Both	Pancreatitis	3	1992	2021	-0.0384	-0.0431	-0.0337	Yes	-16.0882	0	-0.04 (-0.04 to -0.03)	Age-standardized
Incidence	Marshall Islands	Female	Pancreatitis	4	1992	2021	-0.0551	-0.088	-0.0223	Yes	-3.2903	0.001	-0.06 (-0.09 to -0.02)	Age-standardized
Incidence	Marshall Islands	Male	Pancreatitis	4	1992	2021	-0.0224	-0.0367	-0.008	Yes	-3.0503	0.002	-0.02 (-0.04 to -0.01)	Age-standardized
Incidence	Mauritania	Both	Pancreatitis	5	1992	2021	-0.1081	-0.1421	-0.0741	Yes	-6.2334	0	-0.11 (-0.14 to -0.07)	Age-standardized
Incidence	Mauritania	Female	Pancreatitis	3	1992	2021	-0.1094	-0.133	-0.0859	Yes	-9.1002	0	-0.11 (-0.13 to -0.09)	Age-standardized
Incidence	Mauritania	Male	Pancreatitis	5	1992	2021	-0.1165	-0.1266	-0.1064	Yes	-22.5676	0	-0.12 (-0.13 to -0.11)	Age-standardized
Incidence	Mauritius	Both	Pancreatitis	4	1992	2021	-0.2698	-0.327	-0.2127	Yes	-9.2404	0	-0.27 (-0.33 to -0.21)	Age-standardized
Incidence	Mauritius	Female	Pancreatitis	5	1992	2021	-0.259	-0.3235	-0.1944	Yes	-7.8531	0	-0.26 (-0.32 to -0.19)	Age-standardized
Incidence	Mauritius	Male	Pancreatitis	5	1992	2021	-0.2957	-0.3121	-0.2792	Yes	-35.1479	0	-0.3 (-0.31 to -0.28)	Age-standardized
Incidence	Mexico	Both	Pancreatitis	5	1992	2021	0.4755	0.4498	0.5012	Yes	36.376	0	0.48 (0.45 to 0.5)	Age-standardized
Incidence	Mexico	Female	Pancreatitis	4	1992	2021	0.6751	0.6465	0.7037	Yes	46.4265	0	0.68 (0.65 to 0.7)	Age-standardized
Incidence	Mexico	Male	Pancreatitis	5	1992	2021	0.2184	0.1886	0.2483	Yes	14.3732	0	0.22 (0.19 to 0.25)	Age-standardized
Incidence	Micronesia (Federated States of)	Both	Pancreatitis	5	1992	2021	-0.1882	-0.2101	-0.1664	Yes	-16.8587	0	-0.19 (-0.21 to -0.17)	Age-standardized
Incidence	Micronesia (Federated States of)	Female	Pancreatitis	5	1992	2021	-0.18	-0.1986	-0.1614	Yes	-18.9177	0	-0.18 (-0.2 to -0.16)	Age-standardized
Incidence	Micronesia (Federated States of)	Male	Pancreatitis	5	1992	2021	-0.2017	-0.2278	-0.1755	Yes	-15.1041	0	-0.2 (-0.23 to -0.18)	Age-standardized
Incidence	Monaco	Both	Pancreatitis	3	1992	2021	-0.064	-0.0874	-0.0405	Yes	-5.351	0	-0.06 (-0.09 to -0.04)	Age-standardized
Incidence	Monaco	Female	Pancreatitis	2	1992	2021	-0.0841	-0.1068	-0.0613	Yes	-7.2518	0	-0.08 (-0.11 to -0.06)	Age-standardized
Incidence	Monaco	Male	Pancreatitis	5	1992	2021	-0.0513	-0.0648	-0.0378	Yes	-7.4533	0	-0.05 (-0.06 to -0.04)	Age-standardized
Incidence	Mongolia	Both	Pancreatitis	4	1992	2021	0.1387	0.1118	0.1657	Yes	10.0962	0	0.14 (0.11 to 0.17)	Age-standardized
Incidence	Mongolia	Female	Pancreatitis	4	1992	2021	0.1229	0.0854	0.1604	Yes	6.427	0	0.12 (0.09 to 0.16)	Age-standardized
Incidence	Mongolia	Male	Pancreatitis	5	1992	2021	0.1549	0.1218	0.1881	Yes	9.1713	0	0.15 (0.12 to 0.19)	Age-standardized
Incidence	Montenegro	Both	Pancreatitis	3	1992	2021	-0.1611	-0.172	-0.1502	Yes	-29.0094	0	-0.16 (-0.17 to -0.15)	Age-standardized
Incidence	Montenegro	Female	Pancreatitis	4	1992	2021	-0.2037	-0.2164	-0.1911	Yes	-31.5487	0	-0.2 (-0.22 to -0.19)	Age-standardized
Incidence	Montenegro	Male	Pancreatitis	5	1992	2021	-0.115	-0.1285	-0.1016	Yes	-16.7319	0	-0.12 (-0.13 to -0.1)	Age-standardized
Incidence	Morocco	Both	Pancreatitis	3	1992	2021	-0.0327	-0.0462	-0.0191	Yes	-4.7362	0	-0.03 (-0.05 to -0.02)	Age-standardized
Incidence	Morocco	Female	Pancreatitis	5	1992	2021	-0.0042	-0.0193	0.011	No	-0.5377	0.591	0 (-0.02 to 0.01)	Age-standardized
Incidence	Morocco	Male	Pancreatitis	5	1992	2021	-0.0677	-0.0796	-0.0558	Yes	-11.1613	0	-0.07 (-0.08 to -0.06)	Age-standardized
Incidence	Mozambique	Both	Pancreatitis	5	1992	2021	0.0403	0.0216	0.0589	Yes	4.2288	0	0.04 (0.02 to 0.06)	Age-standardized
Incidence	Mozambique	Female	Pancreatitis	4	1992	2021	0.1047	0.0743	0.135	Yes	6.7656	0	0.1 (0.07 to 0.14)	Age-standardized
Incidence	Mozambique	Male	Pancreatitis	5	1992	2021	-0.0241	-0.0549	0.0066	No	-1.5387	0.124	-0.02 (-0.05 to 0.01)	Age-standardized
Incidence	Myanmar	Both	Pancreatitis	4	1992	2021	-0.0964	-0.1114	-0.0814	Yes	-12.5973	0	-0.1 (-0.11 to -0.08)	Age-standardized
Incidence	Myanmar	Female	Pancreatitis	3	1992	2021	-0.0968	-0.1104	-0.0832	Yes	-13.9843	0	-0.1 (-0.11 to -0.08)	Age-standardized
Incidence	Myanmar	Male	Pancreatitis	5	1992	2021	-0.0917	-0.102	-0.0813	Yes	-17.3022	0	-0.09 (-0.1 to -0.08)	Age-standardized
Incidence	Namibia	Both	Pancreatitis	4	1992	2021	0.0673	0.0463	0.0884	Yes	6.2637	0	0.07 (0.05 to 0.09)	Age-standardized
Incidence	Namibia	Female	Pancreatitis	5	1992	2021	0.0726	0.0494	0.0958	Yes	6.1277	0	0.07 (0.05 to 0.1)	Age-standardized
Incidence	Namibia	Male	Pancreatitis	5	1992	2021	0.0585	0.0468	0.0702	Yes	9.8427	0	0.06 (0.05 to 0.07)	Age-standardized
Incidence	Nauru	Both	Pancreatitis	3	1992	2021	-0.0128	-0.0318	0.0063	No	-1.3134	0.189	-0.01 (-0.03 to 0.01)	Age-standardized
Incidence	Nauru	Female	Pancreatitis	4	1992	2021	-0.0065	-0.0311	0.0182	No	-0.5127	0.608	-0.01 (-0.03 to 0.02)	Age-standardized
Incidence	Nauru	Male	Pancreatitis	2	1992	2021	-0.0106	-0.033	0.0118	No	-0.9288	0.353	-0.01 (-0.03 to 0.01)	Age-standardized
Incidence	Nepal	Both	Pancreatitis	2	1992	2021	-0.9188	-0.9343	-0.9033	Yes	-115.768	0	-0.92 (-0.93 to -0.9)	Age-standardized
Incidence	Nepal	Female	Pancreatitis	1	1992	2021	-1.6093	-1.6411	-1.5776	Yes	-98.5924	0	-1.61 (-1.64 to -1.58)	Age-standardized
Incidence	Nepal	Male	Pancreatitis	3	1992	2021	-0.4367	-0.4611	-0.4122	Yes	-34.9028	0	-0.44 (-0.46 to -0.41)	Age-standardized
Incidence	Netherlands	Both	Pancreatitis	1	1992	2021	0.9373	0.3578	1.5201	Yes	3.1758	0.001	0.94 (0.36 to 1.52)	Age-standardized
Incidence	Netherlands	Female	Pancreatitis	1	1992	2021	1.2555	0.5441	1.9718	Yes	3.4687	0.001	1.26 (0.54 to 1.97)	Age-standardized
Incidence	Netherlands	Male	Pancreatitis	3	1992	2021	0.6198	0.4742	0.7657	Yes	8.3611	0	0.62 (0.47 to 0.77)	Age-standardized
Incidence	New Zealand	Both	Pancreatitis	5	1992	2021	0.8242	0.8007	0.8477	Yes	69.0072	0	0.82 (0.8 to 0.85)	Age-standardized
Incidence	New Zealand	Female	Pancreatitis	5	1992	2021	0.8873	0.8439	0.9307	Yes	40.2191	0	0.89 (0.84 to 0.93)	Age-standardized
Incidence	New Zealand	Male	Pancreatitis	4	1992	2021	0.7815	0.7352	0.8279	Yes	33.1603	0	0.78 (0.74 to 0.83)	Age-standardized
Incidence	Nicaragua	Both	Pancreatitis	4	1992	2021	-0.2114	-0.2261	-0.1967	Yes	-28.1525	0	-0.21 (-0.23 to -0.2)	Age-standardized
Incidence	Nicaragua	Female	Pancreatitis	4	1992	2021	-0.2173	-0.2439	-0.1907	Yes	-16.0056	0	-0.22 (-0.24 to -0.19)	Age-standardized
Incidence	Nicaragua	Male	Pancreatitis	3	1992	2021	-0.202	-0.2122	-0.1917	Yes	-38.7106	0	-0.2 (-0.21 to -0.19)	Age-standardized
Incidence	Niger	Both	Pancreatitis	4	1992	2021	0.0325	-0.0165	0.0815	No	1.2995	0.194	0.03 (-0.02 to 0.08)	Age-standardized
Incidence	Niger	Female	Pancreatitis	3	1992	2021	0.0574	-0.0083	0.1232	No	1.7127	0.087	0.06 (-0.01 to 0.12)	Age-standardized
Incidence	Niger	Male	Pancreatitis	5	1992	2021	0.0124	-0.0141	0.0389	No	0.9172	0.359	0.01 (-0.01 to 0.04)	Age-standardized
Incidence	Nigeria	Both	Pancreatitis	3	1992	2021	0.1123	0.0904	0.1343	Yes	10.0429	0	0.11 (0.09 to 0.13)	Age-standardized
Incidence	Nigeria	Female	Pancreatitis	5	1992	2021	0.1092	0.0524	0.1661	Yes	3.7679	0	0.11 (0.05 to 0.17)	Age-standardized
Incidence	Nigeria	Male	Pancreatitis	5	1992	2021	0.1416	0.1106	0.1727	Yes	8.9497	0	0.14 (0.11 to 0.17)	Age-standardized
Incidence	Niue	Both	Pancreatitis	3	1992	2021	-0.0209	-0.0458	0.004	No	-1.6449	0.1	-0.02 (-0.05 to 0)	Age-standardized
Incidence	Niue	Female	Pancreatitis	4	1992	2021	-0.0256	-0.0559	0.0046	No	-1.6598	0.097	-0.03 (-0.06 to 0)	Age-standardized
Incidence	Niue	Male	Pancreatitis	4	1992	2021	-0.0177	-0.0537	0.0184	No	-0.9591	0.337	-0.02 (-0.05 to 0.02)	Age-standardized
Incidence	North Macedonia	Both	Pancreatitis	4	1992	2021	-0.1484	-0.1657	-0.1312	Yes	-16.8261	0	-0.15 (-0.17 to -0.13)	Age-standardized
Incidence	North Macedonia	Female	Pancreatitis	3	1992	2021	-0.1909	-0.2004	-0.1815	Yes	-39.5176	0	-0.19 (-0.2 to -0.18)	Age-standardized
Incidence	North Macedonia	Male	Pancreatitis	4	1992	2021	-0.1195	-0.1462	-0.0928	Yes	-8.7784	0	-0.12 (-0.15 to -0.09)	Age-standardized
Incidence	Northern Mariana Islands	Both	Pancreatitis	5	1992	2021	0.0387	-0.0017	0.0791	No	1.8795	0.06	0.04 (0 to 0.08)	Age-standardized
Incidence	Northern Mariana Islands	Female	Pancreatitis	5	1992	2021	0.0341	-0.0546	0.1229	No	0.7536	0.451	0.03 (-0.05 to 0.12)	Age-standardized
Incidence	Northern Mariana Islands	Male	Pancreatitis	5	1992	2021	0.0835	0.0156	0.1515	Yes	2.4098	0.016	0.08 (0.02 to 0.15)	Age-standardized
Incidence	Norway	Both	Pancreatitis	5	1992	2021	-0.1817	-0.1933	-0.1702	Yes	-30.8918	0	-0.18 (-0.19 to -0.17)	Age-standardized
Incidence	Norway	Female	Pancreatitis	5	1992	2021	-0.3065	-0.3236	-0.2894	Yes	-35.0321	0	-0.31 (-0.32 to -0.29)	Age-standardized
Incidence	Norway	Male	Pancreatitis	4	1992	2021	-0.1124	-0.1369	-0.0878	Yes	-8.9705	0	-0.11 (-0.14 to -0.09)	Age-standardized
Incidence	Oman	Both	Pancreatitis	3	1992	2021	-0.1512	-0.162	-0.1404	Yes	-27.4584	0	-0.15 (-0.16 to -0.14)	Age-standardized
Incidence	Oman	Female	Pancreatitis	3	1992	2021	-0.141	-0.161	-0.121	Yes	-13.8085	0	-0.14 (-0.16 to -0.12)	Age-standardized
Incidence	Oman	Male	Pancreatitis	2	1992	2021	-0.1519	-0.1651	-0.1388	Yes	-22.6098	0	-0.15 (-0.17 to -0.14)	Age-standardized
Incidence	Pakistan	Both	Pancreatitis	4	1992	2021	0.219	0.2014	0.2365	Yes	24.4367	0	0.22 (0.2 to 0.24)	Age-standardized
Incidence	Pakistan	Female	Pancreatitis	5	1992	2021	0.2377	0.2244	0.2511	Yes	34.9824	0	0.24 (0.22 to 0.25)	Age-standardized
Incidence	Pakistan	Male	Pancreatitis	5	1992	2021	0.2117	0.1926	0.2308	Yes	21.7531	0	0.21 (0.19 to 0.23)	Age-standardized
Incidence	Palau	Both	Pancreatitis	5	1992	2021	-0.025	-0.0369	-0.0131	Yes	-4.112	0	-0.03 (-0.04 to -0.01)	Age-standardized
Incidence	Palau	Female	Pancreatitis	4	1992	2021	-0.0257	-0.0345	-0.017	Yes	-5.7511	0	-0.03 (-0.03 to -0.02)	Age-standardized
Incidence	Palau	Male	Pancreatitis	5	1992	2021	-0.0303	-0.0429	-0.0176	Yes	-4.6903	0	-0.03 (-0.04 to -0.02)	Age-standardized
Incidence	Palestine	Both	Pancreatitis	5	1992	2021	-0.0923	-0.0982	-0.0865	Yes	-30.7596	0	-0.09 (-0.1 to -0.09)	Age-standardized
Incidence	Palestine	Female	Pancreatitis	4	1992	2021	-0.0782	-0.0944	-0.0621	Yes	-9.4846	0	-0.08 (-0.09 to -0.06)	Age-standardized
Incidence	Palestine	Male	Pancreatitis	5	1992	2021	-0.1096	-0.1373	-0.082	Yes	-7.7706	0	-0.11 (-0.14 to -0.08)	Age-standardized
Incidence	Panama	Both	Pancreatitis	5	1992	2021	-0.1106	-0.13	-0.0911	Yes	-11.1439	0	-0.11 (-0.13 to -0.09)	Age-standardized
Incidence	Panama	Female	Pancreatitis	5	1992	2021	-0.1166	-0.1498	-0.0835	Yes	-6.8891	0	-0.12 (-0.15 to -0.08)	Age-standardized
Incidence	Panama	Male	Pancreatitis	5	1992	2021	-0.1012	-0.1152	-0.0873	Yes	-14.2032	0	-0.1 (-0.12 to -0.09)	Age-standardized
Incidence	Papua New Guinea	Both	Pancreatitis	5	1992	2021	-0.0723	-0.0783	-0.0663	Yes	-23.6153	0	-0.07 (-0.08 to -0.07)	Age-standardized
Incidence	Papua New Guinea	Female	Pancreatitis	3	1992	2021	-0.0868	-0.1119	-0.0617	Yes	-6.7771	0	-0.09 (-0.11 to -0.06)	Age-standardized
Incidence	Papua New Guinea	Male	Pancreatitis	3	1992	2021	-0.0683	-0.1004	-0.0362	Yes	-4.1732	0	-0.07 (-0.1 to -0.04)	Age-standardized
Incidence	Paraguay	Both	Pancreatitis	5	1992	2021	0.0351	0.0082	0.0621	Yes	2.5532	0.011	0.04 (0.01 to 0.06)	Age-standardized
Incidence	Paraguay	Female	Pancreatitis	5	1992	2021	0.035	0.0081	0.0619	Yes	2.5484	0.011	0.04 (0.01 to 0.06)	Age-standardized
Incidence	Paraguay	Male	Pancreatitis	5	1992	2021	0.0368	-0.0134	0.0871	No	1.4364	0.151	0.04 (-0.01 to 0.09)	Age-standardized
Incidence	Peru	Both	Pancreatitis	5	1992	2021	-0.4451	-0.4594	-0.4307	Yes	-60.6301	0	-0.45 (-0.46 to -0.43)	Age-standardized
Incidence	Peru	Female	Pancreatitis	5	1992	2021	-0.4082	-0.4182	-0.3982	Yes	-79.7381	0	-0.41 (-0.42 to -0.4)	Age-standardized
Incidence	Peru	Male	Pancreatitis	5	1992	2021	-0.4004	-0.4295	-0.3712	Yes	-26.8345	0	-0.4 (-0.43 to -0.37)	Age-standardized
Incidence	Philippines	Both	Pancreatitis	2	1992	2021	0.5717	0.5326	0.6107	Yes	28.785	0	0.57 (0.53 to 0.61)	Age-standardized
Incidence	Philippines	Female	Pancreatitis	4	1992	2021	0.449	0.4256	0.4724	Yes	37.7448	0	0.45 (0.43 to 0.47)	Age-standardized
Incidence	Philippines	Male	Pancreatitis	2	1992	2021	0.7347	0.6291	0.8405	Yes	13.6693	0	0.73 (0.63 to 0.84)	Age-standardized
Incidence	Poland	Both	Pancreatitis	2	1992	2021	-1.1246	-1.2209	-1.0282	Yes	-22.7416	0	-1.12 (-1.22 to -1.03)	Age-standardized
Incidence	Poland	Female	Pancreatitis	3	1992	2021	-0.7759	-0.8473	-0.7044	Yes	-21.1937	0	-0.78 (-0.85 to -0.7)	Age-standardized
Incidence	Poland	Male	Pancreatitis	3	1992	2021	-1.4174	-1.5693	-1.2652	Yes	-18.1402	0	-1.42 (-1.57 to -1.27)	Age-standardized
Incidence	Portugal	Both	Pancreatitis	5	1992	2021	0.288	0.2283	0.3478	Yes	9.4598	0	0.29 (0.23 to 0.35)	Age-standardized
Incidence	Portugal	Female	Pancreatitis	5	1992	2021	0.0327	-0.0092	0.0746	No	1.5306	0.126	0.03 (-0.01 to 0.07)	Age-standardized
Incidence	Portugal	Male	Pancreatitis	4	1992	2021	0.5834	0.457	0.71	Yes	9.0626	0	0.58 (0.46 to 0.71)	Age-standardized
Incidence	Puerto Rico	Both	Pancreatitis	5	1992	2021	-0.2983	-0.3272	-0.2693	Yes	-20.1314	0	-0.3 (-0.33 to -0.27)	Age-standardized
Incidence	Puerto Rico	Female	Pancreatitis	4	1992	2021	-0.2721	-0.2921	-0.2522	Yes	-26.7082	0	-0.27 (-0.29 to -0.25)	Age-standardized
Incidence	Puerto Rico	Male	Pancreatitis	5	1992	2021	-0.3287	-0.4229	-0.2345	Yes	-6.8316	0	-0.33 (-0.42 to -0.23)	Age-standardized
Incidence	Qatar	Both	Pancreatitis	4	1992	2021	-0.2381	-0.2573	-0.2188	Yes	-24.1729	0	-0.24 (-0.26 to -0.22)	Age-standardized
Incidence	Qatar	Female	Pancreatitis	4	1992	2021	-0.2161	-0.2331	-0.1991	Yes	-24.8299	0	-0.22 (-0.23 to -0.2)	Age-standardized
Incidence	Qatar	Male	Pancreatitis	5	1992	2021	-0.2505	-0.2634	-0.2376	Yes	-37.9973	0	-0.25 (-0.26 to -0.24)	Age-standardized
Incidence	Republic of Korea	Both	Pancreatitis	5	1992	2021	-0.2307	-0.2576	-0.2039	Yes	-16.8305	0	-0.23 (-0.26 to -0.2)	Age-standardized
Incidence	Republic of Korea	Female	Pancreatitis	5	1992	2021	-0.2474	-0.2659	-0.229	Yes	-26.2513	0	-0.25 (-0.27 to -0.23)	Age-standardized
Incidence	Republic of Korea	Male	Pancreatitis	2	1992	2021	-0.2151	-0.239	-0.1912	Yes	-17.6383	0	-0.22 (-0.24 to -0.19)	Age-standardized
Incidence	Republic of Moldova	Both	Pancreatitis	5	1992	2021	-0.3056	-0.3285	-0.2827	Yes	-26.1337	0	-0.31 (-0.33 to -0.28)	Age-standardized
Incidence	Republic of Moldova	Female	Pancreatitis	5	1992	2021	-0.2812	-0.3054	-0.2569	Yes	-22.7129	0	-0.28 (-0.31 to -0.26)	Age-standardized
Incidence	Republic of Moldova	Male	Pancreatitis	5	1992	2021	-0.3408	-0.3827	-0.2988	Yes	-15.897	0	-0.34 (-0.38 to -0.3)	Age-standardized
Incidence	Romania	Both	Pancreatitis	4	1992	2021	-0.7707	-0.8613	-0.6802	Yes	-16.6181	0	-0.77 (-0.86 to -0.68)	Age-standardized
Incidence	Romania	Female	Pancreatitis	4	1992	2021	-0.6959	-0.7959	-0.5959	Yes	-13.5933	0	-0.7 (-0.8 to -0.6)	Age-standardized
Incidence	Romania	Male	Pancreatitis	4	1992	2021	-0.8405	-0.9248	-0.7561	Yes	-19.4532	0	-0.84 (-0.92 to -0.76)	Age-standardized
Incidence	Russian Federation	Both	Pancreatitis	5	1992	2021	0.104	0.0544	0.1536	Yes	4.1118	0	0.1 (0.05 to 0.15)	Age-standardized
Incidence	Russian Federation	Female	Pancreatitis	5	1992	2021	0.2368	0.1521	0.3216	Yes	5.4833	0	0.24 (0.15 to 0.32)	Age-standardized
Incidence	Russian Federation	Male	Pancreatitis	4	1992	2021	-0.0003	-0.1025	0.102	No	-0.0062	0.995	0 (-0.1 to 0.1)	Age-standardized
Incidence	Rwanda	Both	Pancreatitis	5	1992	2021	-0.0865	-0.1332	-0.0398	Yes	-3.6299	0	-0.09 (-0.13 to -0.04)	Age-standardized
Incidence	Rwanda	Female	Pancreatitis	4	1992	2021	-0.0229	-0.0825	0.0368	No	-0.7511	0.453	-0.02 (-0.08 to 0.04)	Age-standardized
Incidence	Rwanda	Male	Pancreatitis	5	1992	2021	-0.1506	-0.1894	-0.1118	Yes	-7.6017	0	-0.15 (-0.19 to -0.11)	Age-standardized
Incidence	Saint Kitts and Nevis	Both	Pancreatitis	3	1992	2021	-0.0838	-0.116	-0.0515	Yes	-5.086	0	-0.08 (-0.12 to -0.05)	Age-standardized
Incidence	Saint Kitts and Nevis	Female	Pancreatitis	3	1992	2021	-0.0583	-0.0818	-0.0349	Yes	-4.8764	0	-0.06 (-0.08 to -0.03)	Age-standardized
Incidence	Saint Kitts and Nevis	Male	Pancreatitis	3	1992	2021	-0.1229	-0.2311	-0.0147	Yes	-2.2252	0.026	-0.12 (-0.23 to -0.01)	Age-standardized
Incidence	Saint Lucia	Both	Pancreatitis	4	1992	2021	-0.1699	-0.1951	-0.1448	Yes	-13.2462	0	-0.17 (-0.2 to -0.14)	Age-standardized
Incidence	Saint Lucia	Female	Pancreatitis	5	1992	2021	-0.1388	-0.1497	-0.1279	Yes	-24.9803	0	-0.14 (-0.15 to -0.13)	Age-standardized
Incidence	Saint Lucia	Male	Pancreatitis	3	1992	2021	-0.1881	-0.2339	-0.1423	Yes	-8.0471	0	-0.19 (-0.23 to -0.14)	Age-standardized
Incidence	Saint Vincent and the Grenadines	Both	Pancreatitis	4	1992	2021	0.0031	-0.0335	0.0396	No	0.1642	0.87	0 (-0.03 to 0.04)	Age-standardized
Incidence	Saint Vincent and the Grenadines	Female	Pancreatitis	4	1992	2021	0.0183	0.0038	0.0329	Yes	2.464	0.014	0.02 (0 to 0.03)	Age-standardized
Incidence	Saint Vincent and the Grenadines	Male	Pancreatitis	1	1992	2021	-0.0145	-0.0466	0.0176	No	-0.8858	0.376	-0.01 (-0.05 to 0.02)	Age-standardized
Incidence	Samoa	Both	Pancreatitis	5	1992	2021	-0.0527	-0.0805	-0.0249	Yes	-3.7129	0	-0.05 (-0.08 to -0.02)	Age-standardized
Incidence	Samoa	Female	Pancreatitis	4	1992	2021	-0.0599	-0.0716	-0.0483	Yes	-10.0607	0	-0.06 (-0.07 to -0.05)	Age-standardized
Incidence	Samoa	Male	Pancreatitis	5	1992	2021	-0.0517	-0.0737	-0.0296	Yes	-4.5914	0	-0.05 (-0.07 to -0.03)	Age-standardized
Incidence	San Marino	Both	Pancreatitis	5	1992	2021	-0.0889	-0.1023	-0.0755	Yes	-12.9626	0	-0.09 (-0.1 to -0.08)	Age-standardized
Incidence	San Marino	Female	Pancreatitis	4	1992	2021	-0.0713	-0.0814	-0.0611	Yes	-13.7631	0	-0.07 (-0.08 to -0.06)	Age-standardized
Incidence	San Marino	Male	Pancreatitis	5	1992	2021	-0.0822	-0.1031	-0.0613	Yes	-7.7186	0	-0.08 (-0.1 to -0.06)	Age-standardized
Incidence	Sao Tome and Principe	Both	Pancreatitis	2	1992	2021	-0.1324	-0.1585	-0.1064	Yes	-9.9528	0	-0.13 (-0.16 to -0.11)	Age-standardized
Incidence	Sao Tome and Principe	Female	Pancreatitis	2	1992	2021	-0.135	-0.1819	-0.0882	Yes	-5.6448	0	-0.14 (-0.18 to -0.09)	Age-standardized
Incidence	Sao Tome and Principe	Male	Pancreatitis	3	1992	2021	-0.1138	-0.1298	-0.0977	Yes	-13.8979	0	-0.11 (-0.13 to -0.1)	Age-standardized
Incidence	Saudi Arabia	Both	Pancreatitis	5	1992	2021	-0.1426	-0.1561	-0.1291	Yes	-20.6852	0	-0.14 (-0.16 to -0.13)	Age-standardized
Incidence	Saudi Arabia	Female	Pancreatitis	4	1992	2021	-0.1286	-0.1433	-0.114	Yes	-17.195	0	-0.13 (-0.14 to -0.11)	Age-standardized
Incidence	Saudi Arabia	Male	Pancreatitis	4	1992	2021	-0.1686	-0.1876	-0.1496	Yes	-17.3794	0	-0.17 (-0.19 to -0.15)	Age-standardized
Incidence	Senegal	Both	Pancreatitis	3	1992	2021	-0.0093	-0.0446	0.0261	No	-0.5149	0.607	-0.01 (-0.04 to 0.03)	Age-standardized
Incidence	Senegal	Female	Pancreatitis	2	1992	2021	0.0475	-0.0097	0.1048	No	1.6277	0.104	0.05 (-0.01 to 0.1)	Age-standardized
Incidence	Senegal	Male	Pancreatitis	4	1992	2021	-0.0282	-0.0507	-0.0056	Yes	-2.4439	0.015	-0.03 (-0.05 to -0.01)	Age-standardized
Incidence	Serbia	Both	Pancreatitis	3	1992	2021	-0.7693	-0.8817	-0.6568	Yes	-13.3564	0	-0.77 (-0.88 to -0.66)	Age-standardized
Incidence	Serbia	Female	Pancreatitis	3	1992	2021	-0.716	-0.8461	-0.5856	Yes	-10.7361	0	-0.72 (-0.85 to -0.59)	Age-standardized
Incidence	Serbia	Male	Pancreatitis	3	1992	2021	-0.8089	-0.938	-0.6795	Yes	-12.2164	0	-0.81 (-0.94 to -0.68)	Age-standardized
Incidence	Seychelles	Both	Pancreatitis	4	1992	2021	-0.0978	-0.112	-0.0836	Yes	-13.5012	0	-0.1 (-0.11 to -0.08)	Age-standardized
Incidence	Seychelles	Female	Pancreatitis	4	1992	2021	-0.0986	-0.1185	-0.0787	Yes	-9.6835	0	-0.1 (-0.12 to -0.08)	Age-standardized
Incidence	Seychelles	Male	Pancreatitis	4	1992	2021	-0.1096	-0.1411	-0.0782	Yes	-6.8255	0	-0.11 (-0.14 to -0.08)	Age-standardized
Incidence	Sierra Leone	Both	Pancreatitis	5	1992	2021	0.2124	0.1365	0.2883	Yes	5.4918	0	0.21 (0.14 to 0.29)	Age-standardized
Incidence	Sierra Leone	Female	Pancreatitis	4	1992	2021	0.2225	0.1327	0.3124	Yes	4.8578	0	0.22 (0.13 to 0.31)	Age-standardized
Incidence	Sierra Leone	Male	Pancreatitis	5	1992	2021	0.189	0.1356	0.2424	Yes	6.9447	0	0.19 (0.14 to 0.24)	Age-standardized
Incidence	Singapore	Both	Pancreatitis	3	1992	2021	0.7151	0.6671	0.7631	Yes	29.3248	0	0.72 (0.67 to 0.76)	Age-standardized
Incidence	Singapore	Female	Pancreatitis	1	1992	2021	0.5656	0.5365	0.5947	Yes	38.1594	0	0.57 (0.54 to 0.59)	Age-standardized
Incidence	Singapore	Male	Pancreatitis	5	1992	2021	0.8471	0.8191	0.8751	Yes	59.5751	0	0.85 (0.82 to 0.88)	Age-standardized
Incidence	Slovakia	Both	Pancreatitis	5	1992	2021	-0.0839	-0.1087	-0.059	Yes	-6.6112	0	-0.08 (-0.11 to -0.06)	Age-standardized
Incidence	Slovakia	Female	Pancreatitis	5	1992	2021	-0.1907	-0.2353	-0.1461	Yes	-8.3738	0	-0.19 (-0.24 to -0.15)	Age-standardized
Incidence	Slovakia	Male	Pancreatitis	4	1992	2021	-0.0165	-0.0573	0.0243	No	-0.7944	0.427	-0.02 (-0.06 to 0.02)	Age-standardized
Incidence	Slovenia	Both	Pancreatitis	5	1992	2021	-0.972	-1.0067	-0.9374	Yes	-54.6793	0	-0.97 (-1.01 to -0.94)	Age-standardized
Incidence	Slovenia	Female	Pancreatitis	5	1992	2021	-0.9065	-0.9457	-0.8673	Yes	-45.0917	0	-0.91 (-0.95 to -0.87)	Age-standardized
Incidence	Slovenia	Male	Pancreatitis	5	1992	2021	-1.0486	-1.0645	-1.0326	Yes	-128.264	0	-1.05 (-1.06 to -1.03)	Age-standardized
Incidence	Solomon Islands	Both	Pancreatitis	5	1992	2021	-0.0686	-0.0791	-0.0582	Yes	-12.8851	0	-0.07 (-0.08 to -0.06)	Age-standardized
Incidence	Solomon Islands	Female	Pancreatitis	5	1992	2021	-0.0723	-0.0768	-0.0678	Yes	-31.2319	0	-0.07 (-0.08 to -0.07)	Age-standardized
Incidence	Solomon Islands	Male	Pancreatitis	5	1992	2021	-0.0681	-0.0846	-0.0516	Yes	-8.0909	0	-0.07 (-0.08 to -0.05)	Age-standardized
Incidence	Somalia	Both	Pancreatitis	5	1992	2021	-0.0418	-0.0585	-0.0251	Yes	-4.9024	0	-0.04 (-0.06 to -0.03)	Age-standardized
Incidence	Somalia	Female	Pancreatitis	3	1992	2021	0.0472	-0.0002	0.0946	No	1.9503	0.051	0.05 (0 to 0.09)	Age-standardized
Incidence	Somalia	Male	Pancreatitis	5	1992	2021	-0.1257	-0.1987	-0.0526	Yes	-3.3694	0.001	-0.13 (-0.2 to -0.05)	Age-standardized
Incidence	South Africa	Both	Pancreatitis	4	1992	2021	-0.1663	-0.2038	-0.1287	Yes	-8.6671	0	-0.17 (-0.2 to -0.13)	Age-standardized
Incidence	South Africa	Female	Pancreatitis	5	1992	2021	-0.1192	-0.1625	-0.076	Yes	-5.3994	0	-0.12 (-0.16 to -0.08)	Age-standardized
Incidence	South Africa	Male	Pancreatitis	2	1992	2021	-0.1971	-0.2454	-0.1487	Yes	-7.9821	0	-0.2 (-0.25 to -0.15)	Age-standardized
Incidence	South Sudan	Both	Pancreatitis	5	1992	2021	-0.0846	-0.1086	-0.0606	Yes	-6.9007	0	-0.08 (-0.11 to -0.06)	Age-standardized
Incidence	South Sudan	Female	Pancreatitis	4	1992	2021	-0.0314	-0.0863	0.0236	No	-1.1192	0.263	-0.03 (-0.09 to 0.02)	Age-standardized
Incidence	South Sudan	Male	Pancreatitis	5	1992	2021	-0.1543	-0.1914	-0.1172	Yes	-8.1473	0	-0.15 (-0.19 to -0.12)	Age-standardized
Incidence	Spain	Both	Pancreatitis	4	1992	2021	1.4383	1.2722	1.6046	Yes	17.0821	0	1.44 (1.27 to 1.6)	Age-standardized
Incidence	Spain	Female	Pancreatitis	4	1992	2021	1.5118	1.3225	1.7014	Yes	15.7561	0	1.51 (1.32 to 1.7)	Age-standardized
Incidence	Spain	Male	Pancreatitis	4	1992	2021	1.2197	1.0812	1.3584	Yes	17.3563	0	1.22 (1.08 to 1.36)	Age-standardized
Incidence	Sri Lanka	Both	Pancreatitis	4	1992	2021	-0.1556	-0.184	-0.1271	Yes	-10.7049	0	-0.16 (-0.18 to -0.13)	Age-standardized
Incidence	Sri Lanka	Female	Pancreatitis	4	1992	2021	-0.1533	-0.1721	-0.1346	Yes	-16.0246	0	-0.15 (-0.17 to -0.13)	Age-standardized
Incidence	Sri Lanka	Male	Pancreatitis	3	1992	2021	-0.1606	-0.1892	-0.1321	Yes	-11.0206	0	-0.16 (-0.19 to -0.13)	Age-standardized
Incidence	Sudan	Both	Pancreatitis	3	1992	2021	-0.1865	-0.2183	-0.1546	Yes	-11.4548	0	-0.19 (-0.22 to -0.15)	Age-standardized
Incidence	Sudan	Female	Pancreatitis	3	1992	2021	-0.1151	-0.1905	-0.0398	Yes	-2.9932	0.003	-0.12 (-0.19 to -0.04)	Age-standardized
Incidence	Sudan	Male	Pancreatitis	5	1992	2021	-0.2475	-0.2584	-0.2367	Yes	-44.7437	0	-0.25 (-0.26 to -0.24)	Age-standardized
Incidence	Suriname	Both	Pancreatitis	1	1992	2021	-0.0024	-0.0163	0.0115	No	-0.3401	0.734	0 (-0.02 to 0.01)	Age-standardized
Incidence	Suriname	Female	Pancreatitis	4	1992	2021	0.0359	0.0294	0.0424	Yes	10.7984	0	0.04 (0.03 to 0.04)	Age-standardized
Incidence	Suriname	Male	Pancreatitis	3	1992	2021	-0.0172	-0.0592	0.0249	No	-0.7995	0.424	-0.02 (-0.06 to 0.02)	Age-standardized
Incidence	Sweden	Both	Pancreatitis	4	1992	2021	0.6761	0.5886	0.7638	Yes	15.1816	0	0.68 (0.59 to 0.76)	Age-standardized
Incidence	Sweden	Female	Pancreatitis	5	1992	2021	0.7789	0.7491	0.8086	Yes	51.5752	0	0.78 (0.75 to 0.81)	Age-standardized
Incidence	Sweden	Male	Pancreatitis	5	1992	2021	0.5673	0.5097	0.6249	Yes	19.3555	0	0.57 (0.51 to 0.62)	Age-standardized
Incidence	Switzerland	Both	Pancreatitis	5	1992	2021	-0.0449	-0.0732	-0.0167	Yes	-3.1198	0.002	-0.04 (-0.07 to -0.02)	Age-standardized
Incidence	Switzerland	Female	Pancreatitis	5	1992	2021	0.122	0.0882	0.1557	Yes	7.0867	0	0.12 (0.09 to 0.16)	Age-standardized
Incidence	Switzerland	Male	Pancreatitis	4	1992	2021	-0.2087	-0.2542	-0.1631	Yes	-8.9727	0	-0.21 (-0.25 to -0.16)	Age-standardized
Incidence	Syrian Arab Republic	Both	Pancreatitis	3	1992	2021	-0.2104	-0.2367	-0.184	Yes	-15.6197	0	-0.21 (-0.24 to -0.18)	Age-standardized
Incidence	Syrian Arab Republic	Female	Pancreatitis	3	1992	2021	-0.1643	-0.2054	-0.1232	Yes	-7.821	0	-0.16 (-0.21 to -0.12)	Age-standardized
Incidence	Syrian Arab Republic	Male	Pancreatitis	3	1992	2021	-0.1884	-0.2067	-0.1701	Yes	-20.1249	0	-0.19 (-0.21 to -0.17)	Age-standardized
Incidence	Taiwan (Province of China)	Both	Pancreatitis	3	1992	2021	-0.3956	-0.4722	-0.319	Yes	-10.1085	0	-0.4 (-0.47 to -0.32)	Age-standardized
Incidence	Taiwan (Province of China)	Female	Pancreatitis	3	1992	2021	-0.5714	-0.6673	-0.4753	Yes	-11.6356	0	-0.57 (-0.67 to -0.48)	Age-standardized
Incidence	Taiwan (Province of China)	Male	Pancreatitis	3	1992	2021	-0.2386	-0.2997	-0.1774	Yes	-7.6399	0	-0.24 (-0.3 to -0.18)	Age-standardized
Incidence	Tajikistan	Both	Pancreatitis	5	1992	2021	-0.026	-0.0353	-0.0167	Yes	-5.4768	0	-0.03 (-0.04 to -0.02)	Age-standardized
Incidence	Tajikistan	Female	Pancreatitis	4	1992	2021	-0.0152	-0.0411	0.0106	No	-1.1545	0.248	-0.02 (-0.04 to 0.01)	Age-standardized
Incidence	Tajikistan	Male	Pancreatitis	5	1992	2021	-0.051	-0.062	-0.04	Yes	-9.0533	0	-0.05 (-0.06 to -0.04)	Age-standardized
Incidence	Thailand	Both	Pancreatitis	5	1992	2021	-0.0012	-0.0233	0.021	No	-0.1039	0.917	0 (-0.02 to 0.02)	Age-standardized
Incidence	Thailand	Female	Pancreatitis	5	1992	2021	0.0283	0.0147	0.0418	Yes	4.0917	0	0.03 (0.01 to 0.04)	Age-standardized
Incidence	Thailand	Male	Pancreatitis	5	1992	2021	-0.0198	-0.0599	0.0202	No	-0.9712	0.331	-0.02 (-0.06 to 0.02)	Age-standardized
Incidence	Timor-Leste	Both	Pancreatitis	3	1992	2021	0.0565	0.0289	0.084	Yes	4.0217	0	0.06 (0.03 to 0.08)	Age-standardized
Incidence	Timor-Leste	Female	Pancreatitis	3	1992	2021	0.0856	0.0585	0.1127	Yes	6.194	0	0.09 (0.06 to 0.11)	Age-standardized
Incidence	Timor-Leste	Male	Pancreatitis	4	1992	2021	0.0318	-0.0203	0.0839	No	1.1957	0.232	0.03 (-0.02 to 0.08)	Age-standardized
Incidence	Togo	Both	Pancreatitis	4	1992	2021	0.1136	0.0661	0.1613	Yes	4.6823	0	0.11 (0.07 to 0.16)	Age-standardized
Incidence	Togo	Female	Pancreatitis	4	1992	2021	0.1406	0.0683	0.2129	Yes	3.8124	0	0.14 (0.07 to 0.21)	Age-standardized
Incidence	Togo	Male	Pancreatitis	5	1992	2021	0.0972	0.0786	0.1159	Yes	10.2199	0	0.1 (0.08 to 0.12)	Age-standardized
Incidence	Tokelau	Both	Pancreatitis	5	1992	2021	-0.0195	-0.0925	0.0535	No	-0.524	0.6	-0.02 (-0.09 to 0.05)	Age-standardized
Incidence	Tokelau	Female	Pancreatitis	5	1992	2021	-0.0423	-0.1464	0.0619	No	-0.7956	0.426	-0.04 (-0.15 to 0.06)	Age-standardized
Incidence	Tokelau	Male	Pancreatitis	3	1992	2021	0.0049	-0.0264	0.0362	No	0.3046	0.761	0 (-0.03 to 0.04)	Age-standardized
Incidence	Tonga	Both	Pancreatitis	4	1992	2021	-0.029	-0.0479	-0.0101	Yes	-3	0.003	-0.03 (-0.05 to -0.01)	Age-standardized
Incidence	Tonga	Female	Pancreatitis	5	1992	2021	-0.0328	-0.043	-0.0227	Yes	-6.32	0	-0.03 (-0.04 to -0.02)	Age-standardized
Incidence	Tonga	Male	Pancreatitis	3	1992	2021	-0.0225	-0.0434	-0.0015	Yes	-2.0991	0.036	-0.02 (-0.04 to 0)	Age-standardized
Incidence	Trinidad and Tobago	Both	Pancreatitis	4	1992	2021	-0.0512	-0.0767	-0.0257	Yes	-3.9303	0	-0.05 (-0.08 to -0.03)	Age-standardized
Incidence	Trinidad and Tobago	Female	Pancreatitis	4	1992	2021	-0.0373	-0.0533	-0.0213	Yes	-4.5567	0	-0.04 (-0.05 to -0.02)	Age-standardized
Incidence	Trinidad and Tobago	Male	Pancreatitis	4	1992	2021	-0.0557	-0.0957	-0.0157	Yes	-2.7277	0.006	-0.06 (-0.1 to -0.02)	Age-standardized
Incidence	Tunisia	Both	Pancreatitis	3	1992	2021	0.0029	-0.0038	0.0097	No	0.8564	0.392	0 (0 to 0.01)	Age-standardized
Incidence	Tunisia	Female	Pancreatitis	5	1992	2021	0.0383	0.0263	0.0504	Yes	6.2257	0	0.04 (0.03 to 0.05)	Age-standardized
Incidence	Tunisia	Male	Pancreatitis	3	1992	2021	-0.0305	-0.0472	-0.0138	Yes	-3.5844	0	-0.03 (-0.05 to -0.01)	Age-standardized
Incidence	Turkey	Both	Pancreatitis	4	1992	2021	-0.6687	-0.7281	-0.6092	Yes	-21.9778	0	-0.67 (-0.73 to -0.61)	Age-standardized
Incidence	Turkey	Female	Pancreatitis	4	1992	2021	-0.6907	-0.7483	-0.6331	Yes	-23.4144	0	-0.69 (-0.75 to -0.63)	Age-standardized
Incidence	Turkey	Male	Pancreatitis	3	1992	2021	-0.6458	-0.6909	-0.6007	Yes	-27.9807	0	-0.65 (-0.69 to -0.6)	Age-standardized
Incidence	Turkmenistan	Both	Pancreatitis	4	1992	2021	0.2517	0.2375	0.2658	Yes	34.9366	0	0.25 (0.24 to 0.27)	Age-standardized
Incidence	Turkmenistan	Female	Pancreatitis	3	1992	2021	0.2157	0.1614	0.2701	Yes	7.7864	0	0.22 (0.16 to 0.27)	Age-standardized
Incidence	Turkmenistan	Male	Pancreatitis	4	1992	2021	0.2593	0.2308	0.2878	Yes	17.855	0	0.26 (0.23 to 0.29)	Age-standardized
Incidence	Tuvalu	Both	Pancreatitis	1	1992	2021	-0.0377	-0.054	-0.0214	Yes	-4.5235	0	-0.04 (-0.05 to -0.02)	Age-standardized
Incidence	Tuvalu	Female	Pancreatitis	3	1992	2021	-0.0563	-0.0995	-0.0131	Yes	-2.5555	0.011	-0.06 (-0.1 to -0.01)	Age-standardized
Incidence	Tuvalu	Male	Pancreatitis	2	1992	2021	-0.0353	-0.0636	-0.007	Yes	-2.4413	0.015	-0.04 (-0.06 to -0.01)	Age-standardized
Incidence	Uganda	Both	Pancreatitis	4	1992	2021	0.0372	0.0126	0.0618	Yes	2.9597	0.003	0.04 (0.01 to 0.06)	Age-standardized
Incidence	Uganda	Female	Pancreatitis	3	1992	2021	0.0979	0.0595	0.1362	Yes	5.0051	0	0.1 (0.06 to 0.14)	Age-standardized
Incidence	Uganda	Male	Pancreatitis	5	1992	2021	-0.0206	-0.0678	0.0267	No	-0.8541	0.393	-0.02 (-0.07 to 0.03)	Age-standardized
Incidence	Ukraine	Both	Pancreatitis	4	1992	2021	0.15	0.1044	0.1957	Yes	6.4502	0	0.15 (0.1 to 0.2)	Age-standardized
Incidence	Ukraine	Female	Pancreatitis	5	1992	2021	0.2932	0.2588	0.3275	Yes	16.7496	0	0.29 (0.26 to 0.33)	Age-standardized
Incidence	Ukraine	Male	Pancreatitis	5	1992	2021	0.0359	-0.0559	0.1279	No	0.7665	0.443	0.04 (-0.06 to 0.13)	Age-standardized
Incidence	United Arab Emirates	Both	Pancreatitis	5	1992	2021	-0.0636	-0.0827	-0.0445	Yes	-6.524	0	-0.06 (-0.08 to -0.04)	Age-standardized
Incidence	United Arab Emirates	Female	Pancreatitis	4	1992	2021	0.0093	-0.0307	0.0493	No	0.4565	0.648	0.01 (-0.03 to 0.05)	Age-standardized
Incidence	United Arab Emirates	Male	Pancreatitis	3	1992	2021	-0.0609	-0.0785	-0.0433	Yes	-6.7678	0	-0.06 (-0.08 to -0.04)	Age-standardized
Incidence	United Kingdom	Both	Pancreatitis	5	1992	2021	0.2578	0.2274	0.2881	Yes	16.6543	0	0.26 (0.23 to 0.29)	Age-standardized
Incidence	United Kingdom	Female	Pancreatitis	5	1992	2021	0.4438	0.3895	0.4982	Yes	16.0319	0	0.44 (0.39 to 0.5)	Age-standardized
Incidence	United Kingdom	Male	Pancreatitis	5	1992	2021	0.0302	0.0112	0.0491	Yes	3.1151	0.002	0.03 (0.01 to 0.05)	Age-standardized
Incidence	United Republic of Tanzania	Both	Pancreatitis	5	1992	2021	0.0457	0.0363	0.0552	Yes	9.5177	0	0.05 (0.04 to 0.06)	Age-standardized
Incidence	United Republic of Tanzania	Female	Pancreatitis	4	1992	2021	0.1224	0.0826	0.1623	Yes	6.0305	0	0.12 (0.08 to 0.16)	Age-standardized
Incidence	United Republic of Tanzania	Male	Pancreatitis	2	1992	2021	-0.0443	-0.072	-0.0166	Yes	-3.1314	0.002	-0.04 (-0.07 to -0.02)	Age-standardized
Incidence	United States Virgin Islands	Both	Pancreatitis	3	1992	2021	0.0043	-0.0312	0.0398	No	0.2373	0.812	0 (-0.03 to 0.04)	Age-standardized
Incidence	United States Virgin Islands	Female	Pancreatitis	4	1992	2021	0.0367	0.0164	0.0571	Yes	3.5406	0	0.04 (0.02 to 0.06)	Age-standardized
Incidence	United States Virgin Islands	Male	Pancreatitis	3	1992	2021	-0.0051	-0.0502	0.04	No	-0.2206	0.825	-0.01 (-0.05 to 0.04)	Age-standardized
Incidence	United States of America	Both	Pancreatitis	4	1992	2021	-0.1516	-0.1746	-0.1287	Yes	-12.9636	0	-0.15 (-0.17 to -0.13)	Age-standardized
Incidence	United States of America	Female	Pancreatitis	4	1992	2021	-0.3036	-0.3404	-0.2668	Yes	-16.1338	0	-0.3 (-0.34 to -0.27)	Age-standardized
Incidence	United States of America	Male	Pancreatitis	3	1992	2021	0.0346	0.005	0.0642	Yes	2.2947	0.022	0.03 (0 to 0.06)	Age-standardized
Incidence	Uruguay	Both	Pancreatitis	5	1992	2021	-0.2093	-0.2262	-0.1925	Yes	-24.3024	0	-0.21 (-0.23 to -0.19)	Age-standardized
Incidence	Uruguay	Female	Pancreatitis	5	1992	2021	-0.2262	-0.2516	-0.2009	Yes	-17.4768	0	-0.23 (-0.25 to -0.2)	Age-standardized
Incidence	Uruguay	Male	Pancreatitis	4	1992	2021	-0.1282	-0.1612	-0.0951	Yes	-7.5997	0	-0.13 (-0.16 to -0.1)	Age-standardized
Incidence	Uzbekistan	Both	Pancreatitis	2	1992	2021	0.1285	0.1064	0.1506	Yes	11.4255	0	0.13 (0.11 to 0.15)	Age-standardized
Incidence	Uzbekistan	Female	Pancreatitis	2	1992	2021	0.1097	0.0839	0.1355	Yes	8.3394	0	0.11 (0.08 to 0.14)	Age-standardized
Incidence	Uzbekistan	Male	Pancreatitis	4	1992	2021	0.1487	0.1249	0.1725	Yes	12.2575	0	0.15 (0.12 to 0.17)	Age-standardized
Incidence	Vanuatu	Both	Pancreatitis	5	1992	2021	0.036	0.0213	0.0506	Yes	4.8145	0	0.04 (0.02 to 0.05)	Age-standardized
Incidence	Vanuatu	Female	Pancreatitis	4	1992	2021	0.0153	-0.0033	0.0339	No	1.6162	0.106	0.02 (0 to 0.03)	Age-standardized
Incidence	Vanuatu	Male	Pancreatitis	5	1992	2021	0.0442	0.0249	0.0636	Yes	4.4839	0	0.04 (0.02 to 0.06)	Age-standardized
Incidence	Venezuela (Bolivarian Republic of)	Both	Pancreatitis	5	1992	2021	-0.1937	-0.2426	-0.1447	Yes	-7.74	0	-0.19 (-0.24 to -0.14)	Age-standardized
Incidence	Venezuela (Bolivarian Republic of)	Female	Pancreatitis	5	1992	2021	-0.1949	-0.2346	-0.1551	Yes	-9.5983	0	-0.19 (-0.23 to -0.16)	Age-standardized
Incidence	Venezuela (Bolivarian Republic of)	Male	Pancreatitis	5	1992	2021	-0.2	-0.2145	-0.1855	Yes	-27.0412	0	-0.2 (-0.21 to -0.19)	Age-standardized
Incidence	Viet Nam	Both	Pancreatitis	5	1992	2021	-0.6561	-0.6932	-0.619	Yes	-34.5144	0	-0.66 (-0.69 to -0.62)	Age-standardized
Incidence	Viet Nam	Female	Pancreatitis	3	1992	2021	-1.2446	-1.3209	-1.1681	Yes	-31.7232	0	-1.24 (-1.32 to -1.17)	Age-standardized
Incidence	Viet Nam	Male	Pancreatitis	4	1992	2021	-0.1538	-0.1635	-0.144	Yes	-30.8599	0	-0.15 (-0.16 to -0.14)	Age-standardized
Incidence	Yemen	Both	Pancreatitis	4	1992	2021	0.0063	0.0031	0.0096	Yes	3.8322	0	0.01 (0 to 0.01)	Age-standardized
Incidence	Yemen	Female	Pancreatitis	4	1992	2021	0.0319	0.0147	0.0491	Yes	3.6313	0	0.03 (0.01 to 0.05)	Age-standardized
Incidence	Yemen	Male	Pancreatitis	5	1992	2021	0.001	-0.0137	0.0157	No	0.1356	0.892	0 (-0.01 to 0.02)	Age-standardized
Incidence	Zambia	Both	Pancreatitis	5	1992	2021	-0.1806	-0.1971	-0.164	Yes	-21.3956	0	-0.18 (-0.2 to -0.16)	Age-standardized
Incidence	Zambia	Female	Pancreatitis	5	1992	2021	-0.1223	-0.1852	-0.0593	Yes	-3.8045	0	-0.12 (-0.19 to -0.06)	Age-standardized
Incidence	Zambia	Male	Pancreatitis	5	1992	2021	-0.2384	-0.299	-0.1777	Yes	-7.691	0	-0.24 (-0.3 to -0.18)	Age-standardized
Incidence	Zimbabwe	Both	Pancreatitis	2	1992	2021	0.1335	0.1167	0.1503	Yes	15.6153	0	0.13 (0.12 to 0.15)	Age-standardized
Incidence	Zimbabwe	Female	Pancreatitis	5	1992	2021	0.146	0.1237	0.1683	Yes	12.8557	0	0.15 (0.12 to 0.17)	Age-standardized
Incidence	Zimbabwe	Male	Pancreatitis	4	1992	2021	0.1052	0.0618	0.1487	Yes	4.7474	0	0.11 (0.06 to 0.15)	Age-standardized
