# Supplementary material for: Global, regional, and national burdens of pancreatitis in children and adolescents aged 0–24 years from 1992 to 2021: a trend analysisbased on the Global Burden of Disease Study 2021
Source: Research Square preprint supplement (doi:10.21203/rs.3.rs-5446819/v1), 2024-12-18
Supplement: Supplementary file 3 [file d767c208c1e0b87ca37430b1.xlsx]

## Sheet: Supplementary 4
Norpred model of pancreatitis incidence and DALYs in various subgroups, globally and regionally, 2040
measure	location	cause	sex	age	year	val	metric
DALYs (Disability-Adjusted Life Years)	Global	Pancreatitis	Male	0 to 4	2040	0.798676	rate
DALYs (Disability-Adjusted Life Years)	Global	Pancreatitis	Male	5 to 9	2040	1.33544	rate
DALYs (Disability-Adjusted Life Years)	Global	Pancreatitis	Male	10 to 14	2040	1.82554	rate
DALYs (Disability-Adjusted Life Years)	Global	Pancreatitis	Male	15 to 19	2040	11.6168	rate
DALYs (Disability-Adjusted Life Years)	Global	Pancreatitis	Male	20 to 24	2040	21.8034	rate
DALYs (Disability-Adjusted Life Years)	Global	Pancreatitis	Female	0 to 4	2040	0.526469	rate
DALYs (Disability-Adjusted Life Years)	Global	Pancreatitis	Female	5 to 9	2040	1.18201	rate
DALYs (Disability-Adjusted Life Years)	Global	Pancreatitis	Female	10 to 14	2040	1.69362	rate
DALYs (Disability-Adjusted Life Years)	Global	Pancreatitis	Female	15 to 19	2040	6.08207	rate
DALYs (Disability-Adjusted Life Years)	Global	Pancreatitis	Female	20 to 24	2040	8.53894	rate
DALYs (Disability-Adjusted Life Years)	Global	Pancreatitis	Both	0 to 4	2040	0.666725	rate
DALYs (Disability-Adjusted Life Years)	Global	Pancreatitis	Both	5 to 9	2040	1.26106	rate
DALYs (Disability-Adjusted Life Years)	Global	Pancreatitis	Both	10 to 14	2040	1.76162	rate
DALYs (Disability-Adjusted Life Years)	Global	Pancreatitis	Both	15 to 19	2040	8.93659	rate
DALYs (Disability-Adjusted Life Years)	Global	Pancreatitis	Both	20 to 24	2040	15.3822	rate
DALYs (Disability-Adjusted Life Years)	Central Europe	Pancreatitis	Male	0 to 4	2040	1.06023	rate
DALYs (Disability-Adjusted Life Years)	Central Europe	Pancreatitis	Male	5 to 9	2040	1.62711	rate
DALYs (Disability-Adjusted Life Years)	Central Europe	Pancreatitis	Male	10 to 14	2040	2.00808	rate
DALYs (Disability-Adjusted Life Years)	Central Europe	Pancreatitis	Male	15 to 19	2040	10.9212	rate
DALYs (Disability-Adjusted Life Years)	Central Europe	Pancreatitis	Male	20 to 24	2040	29.7518	rate
DALYs (Disability-Adjusted Life Years)	Central Europe	Pancreatitis	Female	0 to 4	2040	0.686914	rate
DALYs (Disability-Adjusted Life Years)	Central Europe	Pancreatitis	Female	5 to 9	2040	1.0784	rate
DALYs (Disability-Adjusted Life Years)	Central Europe	Pancreatitis	Female	10 to 14	2040	1.28015	rate
DALYs (Disability-Adjusted Life Years)	Central Europe	Pancreatitis	Female	15 to 19	2040	3.60382	rate
DALYs (Disability-Adjusted Life Years)	Central Europe	Pancreatitis	Female	20 to 24	2040	6.8948	rate
DALYs (Disability-Adjusted Life Years)	Central Europe	Pancreatitis	Both	0 to 4	2040	0.878948	rate
DALYs (Disability-Adjusted Life Years)	Central Europe	Pancreatitis	Both	5 to 9	2040	1.36067	rate
DALYs (Disability-Adjusted Life Years)	Central Europe	Pancreatitis	Both	10 to 14	2040	1.65459	rate
DALYs (Disability-Adjusted Life Years)	Central Europe	Pancreatitis	Both	15 to 19	2040	7.36472	rate
DALYs (Disability-Adjusted Life Years)	Central Europe	Pancreatitis	Both	20 to 24	2040	18.6275	rate
DALYs (Disability-Adjusted Life Years)	Central Asia	Pancreatitis	Male	0 to 4	2040	1.66576	rate
DALYs (Disability-Adjusted Life Years)	Central Asia	Pancreatitis	Male	5 to 9	2040	2.21425	rate
DALYs (Disability-Adjusted Life Years)	Central Asia	Pancreatitis	Male	10 to 14	2040	2.18639	rate
DALYs (Disability-Adjusted Life Years)	Central Asia	Pancreatitis	Male	15 to 19	2040	11.1173	rate
DALYs (Disability-Adjusted Life Years)	Central Asia	Pancreatitis	Male	20 to 24	2040	24.1765	rate
DALYs (Disability-Adjusted Life Years)	Central Asia	Pancreatitis	Female	0 to 4	2040	2.67989	rate
DALYs (Disability-Adjusted Life Years)	Central Asia	Pancreatitis	Female	5 to 9	2040	1.53025	rate
DALYs (Disability-Adjusted Life Years)	Central Asia	Pancreatitis	Female	10 to 14	2040	1.49081	rate
DALYs (Disability-Adjusted Life Years)	Central Asia	Pancreatitis	Female	15 to 19	2040	5.54021	rate
DALYs (Disability-Adjusted Life Years)	Central Asia	Pancreatitis	Female	20 to 24	2040	9.93541	rate
DALYs (Disability-Adjusted Life Years)	Central Asia	Pancreatitis	Both	0 to 4	2040	2.1547	rate
DALYs (Disability-Adjusted Life Years)	Central Asia	Pancreatitis	Both	5 to 9	2040	1.88442	rate
DALYs (Disability-Adjusted Life Years)	Central Asia	Pancreatitis	Both	10 to 14	2040	1.85084	rate
DALYs (Disability-Adjusted Life Years)	Central Asia	Pancreatitis	Both	15 to 19	2040	8.42348	rate
DALYs (Disability-Adjusted Life Years)	Central Asia	Pancreatitis	Both	20 to 24	2040	17.2896	rate
DALYs (Disability-Adjusted Life Years)	High-income North America	Pancreatitis	Male	0 to 4	2040	0.637459	rate
DALYs (Disability-Adjusted Life Years)	High-income North America	Pancreatitis	Male	5 to 9	2040	1.70502	rate
DALYs (Disability-Adjusted Life Years)	High-income North America	Pancreatitis	Male	10 to 14	2040	2.21992	rate
DALYs (Disability-Adjusted Life Years)	High-income North America	Pancreatitis	Male	15 to 19	2040	6.01574	rate
DALYs (Disability-Adjusted Life Years)	High-income North America	Pancreatitis	Male	20 to 24	2040	12.999	rate
DALYs (Disability-Adjusted Life Years)	High-income North America	Pancreatitis	Female	0 to 4	2040	0.430976	rate
DALYs (Disability-Adjusted Life Years)	High-income North America	Pancreatitis	Female	5 to 9	2040	1.3603	rate
DALYs (Disability-Adjusted Life Years)	High-income North America	Pancreatitis	Female	10 to 14	2040	2.28578	rate
DALYs (Disability-Adjusted Life Years)	High-income North America	Pancreatitis	Female	15 to 19	2040	3.65774	rate
DALYs (Disability-Adjusted Life Years)	High-income North America	Pancreatitis	Female	20 to 24	2040	6.82992	rate
DALYs (Disability-Adjusted Life Years)	High-income North America	Pancreatitis	Both	0 to 4	2040	0.536616	rate
DALYs (Disability-Adjusted Life Years)	High-income North America	Pancreatitis	Both	5 to 9	2040	1.53664	rate
DALYs (Disability-Adjusted Life Years)	High-income North America	Pancreatitis	Both	10 to 14	2040	2.25209	rate
DALYs (Disability-Adjusted Life Years)	High-income North America	Pancreatitis	Both	15 to 19	2040	4.86585	rate
DALYs (Disability-Adjusted Life Years)	High-income North America	Pancreatitis	Both	20 to 24	2040	9.98529	rate
DALYs (Disability-Adjusted Life Years)	Western Sub-Saharan Africa	Pancreatitis	Male	0 to 4	2040	2.25283	rate
DALYs (Disability-Adjusted Life Years)	Western Sub-Saharan Africa	Pancreatitis	Male	5 to 9	2040	1.09223	rate
DALYs (Disability-Adjusted Life Years)	Western Sub-Saharan Africa	Pancreatitis	Male	10 to 14	2040	1.15222	rate
DALYs (Disability-Adjusted Life Years)	Western Sub-Saharan Africa	Pancreatitis	Male	15 to 19	2040	23.9608	rate
DALYs (Disability-Adjusted Life Years)	Western Sub-Saharan Africa	Pancreatitis	Male	20 to 24	2040	30.8498	rate
DALYs (Disability-Adjusted Life Years)	Western Sub-Saharan Africa	Pancreatitis	Female	0 to 4	2040	0.640265	rate
DALYs (Disability-Adjusted Life Years)	Western Sub-Saharan Africa	Pancreatitis	Female	5 to 9	2040	1.29194	rate
DALYs (Disability-Adjusted Life Years)	Western Sub-Saharan Africa	Pancreatitis	Female	10 to 14	2040	2.64608	rate
DALYs (Disability-Adjusted Life Years)	Western Sub-Saharan Africa	Pancreatitis	Female	15 to 19	2040	3.32535	rate
DALYs (Disability-Adjusted Life Years)	Western Sub-Saharan Africa	Pancreatitis	Female	20 to 24	2040	5.0403	rate
DALYs (Disability-Adjusted Life Years)	Western Sub-Saharan Africa	Pancreatitis	Both	0 to 4	2040	1.46157	rate
DALYs (Disability-Adjusted Life Years)	Western Sub-Saharan Africa	Pancreatitis	Both	5 to 9	2040	1.19037	rate
DALYs (Disability-Adjusted Life Years)	Western Sub-Saharan Africa	Pancreatitis	Both	10 to 14	2040	1.88726	rate
DALYs (Disability-Adjusted Life Years)	Western Sub-Saharan Africa	Pancreatitis	Both	15 to 19	2040	13.7925	rate
DALYs (Disability-Adjusted Life Years)	Western Sub-Saharan Africa	Pancreatitis	Both	20 to 24	2040	18.0989	rate
DALYs (Disability-Adjusted Life Years)	Oceania	Pancreatitis	Male	0 to 4	2040	0.0914561	rate
DALYs (Disability-Adjusted Life Years)	Oceania	Pancreatitis	Male	5 to 9	2040	0.491202	rate
DALYs (Disability-Adjusted Life Years)	Oceania	Pancreatitis	Male	10 to 14	2040	0.987723	rate
DALYs (Disability-Adjusted Life Years)	Oceania	Pancreatitis	Male	15 to 19	2040	6.86839	rate
DALYs (Disability-Adjusted Life Years)	Oceania	Pancreatitis	Male	20 to 24	2040	32.9968	rate
DALYs (Disability-Adjusted Life Years)	Oceania	Pancreatitis	Female	0 to 4	2040	0.32346	rate
DALYs (Disability-Adjusted Life Years)	Oceania	Pancreatitis	Female	5 to 9	2040	12.7331	rate
DALYs (Disability-Adjusted Life Years)	Oceania	Pancreatitis	Female	10 to 14	2040	0.902625	rate
DALYs (Disability-Adjusted Life Years)	Oceania	Pancreatitis	Female	15 to 19	2040	12.7351	rate
DALYs (Disability-Adjusted Life Years)	Oceania	Pancreatitis	Female	20 to 24	2040	10.3107	rate
DALYs (Disability-Adjusted Life Years)	Oceania	Pancreatitis	Both	0 to 4	2040	0.203686	rate
DALYs (Disability-Adjusted Life Years)	Oceania	Pancreatitis	Both	5 to 9	2040	6.41613	rate
DALYs (Disability-Adjusted Life Years)	Oceania	Pancreatitis	Both	10 to 14	2040	0.946498	rate
DALYs (Disability-Adjusted Life Years)	Oceania	Pancreatitis	Both	15 to 19	2040	9.71551	rate
DALYs (Disability-Adjusted Life Years)	Oceania	Pancreatitis	Both	20 to 24	2040	21.9577	rate
DALYs (Disability-Adjusted Life Years)	East Asia	Pancreatitis	Male	0 to 4	2040	0.518632	rate
DALYs (Disability-Adjusted Life Years)	East Asia	Pancreatitis	Male	5 to 9	2040	0.786844	rate
DALYs (Disability-Adjusted Life Years)	East Asia	Pancreatitis	Male	10 to 14	2040	0.918395	rate
DALYs (Disability-Adjusted Life Years)	East Asia	Pancreatitis	Male	15 to 19	2040	2.89175	rate
DALYs (Disability-Adjusted Life Years)	East Asia	Pancreatitis	Male	20 to 24	2040	5.5251	rate
DALYs (Disability-Adjusted Life Years)	East Asia	Pancreatitis	Female	0 to 4	2040	0.425832	rate
DALYs (Disability-Adjusted Life Years)	East Asia	Pancreatitis	Female	5 to 9	2040	0.413237	rate
DALYs (Disability-Adjusted Life Years)	East Asia	Pancreatitis	Female	10 to 14	2040	0.791822	rate
DALYs (Disability-Adjusted Life Years)	East Asia	Pancreatitis	Female	15 to 19	2040	1.69809	rate
DALYs (Disability-Adjusted Life Years)	East Asia	Pancreatitis	Female	20 to 24	2040	2.25791	rate
DALYs (Disability-Adjusted Life Years)	East Asia	Pancreatitis	Both	0 to 4	2040	0.475762	rate
DALYs (Disability-Adjusted Life Years)	East Asia	Pancreatitis	Both	5 to 9	2040	0.614208	rate
DALYs (Disability-Adjusted Life Years)	East Asia	Pancreatitis	Both	10 to 14	2040	0.859898	rate
DALYs (Disability-Adjusted Life Years)	East Asia	Pancreatitis	Both	15 to 19	2040	2.33978	rate
DALYs (Disability-Adjusted Life Years)	East Asia	Pancreatitis	Both	20 to 24	2040	4.01382	rate
DALYs (Disability-Adjusted Life Years)	North Africa and Middle East	Pancreatitis	Male	0 to 4	2040	0.612447	rate
DALYs (Disability-Adjusted Life Years)	North Africa and Middle East	Pancreatitis	Male	5 to 9	2040	1.16848	rate
DALYs (Disability-Adjusted Life Years)	North Africa and Middle East	Pancreatitis	Male	10 to 14	2040	2.23237	rate
DALYs (Disability-Adjusted Life Years)	North Africa and Middle East	Pancreatitis	Male	15 to 19	2040	3.20583	rate
DALYs (Disability-Adjusted Life Years)	North Africa and Middle East	Pancreatitis	Male	20 to 24	2040	4.26349	rate
DALYs (Disability-Adjusted Life Years)	North Africa and Middle East	Pancreatitis	Female	0 to 4	2040	0.671274	rate
DALYs (Disability-Adjusted Life Years)	North Africa and Middle East	Pancreatitis	Female	5 to 9	2040	1.80063	rate
DALYs (Disability-Adjusted Life Years)	North Africa and Middle East	Pancreatitis	Female	10 to 14	2040	1.55198	rate
DALYs (Disability-Adjusted Life Years)	North Africa and Middle East	Pancreatitis	Female	15 to 19	2040	2.48222	rate
DALYs (Disability-Adjusted Life Years)	North Africa and Middle East	Pancreatitis	Female	20 to 24	2040	3.67129	rate
DALYs (Disability-Adjusted Life Years)	North Africa and Middle East	Pancreatitis	Both	0 to 4	2040	0.641063	rate
DALYs (Disability-Adjusted Life Years)	North Africa and Middle East	Pancreatitis	Both	5 to 9	2040	1.47609	rate
DALYs (Disability-Adjusted Life Years)	North Africa and Middle East	Pancreatitis	Both	10 to 14	2040	1.90117	rate
DALYs (Disability-Adjusted Life Years)	North Africa and Middle East	Pancreatitis	Both	15 to 19	2040	2.8534	rate
DALYs (Disability-Adjusted Life Years)	North Africa and Middle East	Pancreatitis	Both	20 to 24	2040	3.97493	rate
DALYs (Disability-Adjusted Life Years)	Western Europe	Pancreatitis	Male	0 to 4	2040	0.256495	rate
DALYs (Disability-Adjusted Life Years)	Western Europe	Pancreatitis	Male	5 to 9	2040	0.539476	rate
DALYs (Disability-Adjusted Life Years)	Western Europe	Pancreatitis	Male	10 to 14	2040	0.754491	rate
DALYs (Disability-Adjusted Life Years)	Western Europe	Pancreatitis	Male	15 to 19	2040	2.33988	rate
DALYs (Disability-Adjusted Life Years)	Western Europe	Pancreatitis	Male	20 to 24	2040	5.00227	rate
DALYs (Disability-Adjusted Life Years)	Western Europe	Pancreatitis	Female	0 to 4	2040	0.321338	rate
DALYs (Disability-Adjusted Life Years)	Western Europe	Pancreatitis	Female	5 to 9	2040	0.524978	rate
DALYs (Disability-Adjusted Life Years)	Western Europe	Pancreatitis	Female	10 to 14	2040	0.819477	rate
DALYs (Disability-Adjusted Life Years)	Western Europe	Pancreatitis	Female	15 to 19	2040	1.6719	rate
DALYs (Disability-Adjusted Life Years)	Western Europe	Pancreatitis	Female	20 to 24	2040	2.92793	rate
DALYs (Disability-Adjusted Life Years)	Western Europe	Pancreatitis	Both	0 to 4	2040	0.28808	rate
DALYs (Disability-Adjusted Life Years)	Western Europe	Pancreatitis	Both	5 to 9	2040	0.532413	rate
DALYs (Disability-Adjusted Life Years)	Western Europe	Pancreatitis	Both	10 to 14	2040	0.78615	rate
DALYs (Disability-Adjusted Life Years)	Western Europe	Pancreatitis	Both	15 to 19	2040	2.01496	rate
DALYs (Disability-Adjusted Life Years)	Western Europe	Pancreatitis	Both	20 to 24	2040	3.99234	rate
DALYs (Disability-Adjusted Life Years)	Southern Latin America	Pancreatitis	Male	0 to 4	2040	0.422134	rate
DALYs (Disability-Adjusted Life Years)	Southern Latin America	Pancreatitis	Male	5 to 9	2040	2.46346	rate
DALYs (Disability-Adjusted Life Years)	Southern Latin America	Pancreatitis	Male	10 to 14	2040	2.43251	rate
DALYs (Disability-Adjusted Life Years)	Southern Latin America	Pancreatitis	Male	15 to 19	2040	8.85118	rate
DALYs (Disability-Adjusted Life Years)	Southern Latin America	Pancreatitis	Male	20 to 24	2040	15.2297	rate
DALYs (Disability-Adjusted Life Years)	Southern Latin America	Pancreatitis	Female	0 to 4	2040	0.621791	rate
DALYs (Disability-Adjusted Life Years)	Southern Latin America	Pancreatitis	Female	5 to 9	2040	2.23546	rate
DALYs (Disability-Adjusted Life Years)	Southern Latin America	Pancreatitis	Female	10 to 14	2040	4.53773	rate
DALYs (Disability-Adjusted Life Years)	Southern Latin America	Pancreatitis	Female	15 to 19	2040	13.3341	rate
DALYs (Disability-Adjusted Life Years)	Southern Latin America	Pancreatitis	Female	20 to 24	2040	17.4212	rate
DALYs (Disability-Adjusted Life Years)	Southern Latin America	Pancreatitis	Both	0 to 4	2040	0.52004	rate
DALYs (Disability-Adjusted Life Years)	Southern Latin America	Pancreatitis	Both	5 to 9	2040	2.35164	rate
DALYs (Disability-Adjusted Life Years)	Southern Latin America	Pancreatitis	Both	10 to 14	2040	3.4651	rate
DALYs (Disability-Adjusted Life Years)	Southern Latin America	Pancreatitis	Both	15 to 19	2040	11.0513	rate
DALYs (Disability-Adjusted Life Years)	Southern Latin America	Pancreatitis	Both	20 to 24	2040	16.3075	rate
DALYs (Disability-Adjusted Life Years)	Andean Latin America	Pancreatitis	Male	0 to 4	2040	2.72014	rate
DALYs (Disability-Adjusted Life Years)	Andean Latin America	Pancreatitis	Male	5 to 9	2040	5.82758	rate
DALYs (Disability-Adjusted Life Years)	Andean Latin America	Pancreatitis	Male	10 to 14	2040	5.0305	rate
DALYs (Disability-Adjusted Life Years)	Andean Latin America	Pancreatitis	Male	15 to 19	2040	22.6227	rate
DALYs (Disability-Adjusted Life Years)	Andean Latin America	Pancreatitis	Male	20 to 24	2040	32.6027	rate
DALYs (Disability-Adjusted Life Years)	Andean Latin America	Pancreatitis	Female	0 to 4	2040	1.47573	rate
DALYs (Disability-Adjusted Life Years)	Andean Latin America	Pancreatitis	Female	5 to 9	2040	6.49447	rate
DALYs (Disability-Adjusted Life Years)	Andean Latin America	Pancreatitis	Female	10 to 14	2040	5.45414	rate
DALYs (Disability-Adjusted Life Years)	Andean Latin America	Pancreatitis	Female	15 to 19	2040	19.1985	rate
DALYs (Disability-Adjusted Life Years)	Andean Latin America	Pancreatitis	Female	20 to 24	2040	19.9059	rate
DALYs (Disability-Adjusted Life Years)	Andean Latin America	Pancreatitis	Both	0 to 4	2040	2.11043	rate
DALYs (Disability-Adjusted Life Years)	Andean Latin America	Pancreatitis	Both	5 to 9	2040	6.15444	rate
DALYs (Disability-Adjusted Life Years)	Andean Latin America	Pancreatitis	Both	10 to 14	2040	5.23822	rate
DALYs (Disability-Adjusted Life Years)	Andean Latin America	Pancreatitis	Both	15 to 19	2040	20.9418	rate
DALYs (Disability-Adjusted Life Years)	Andean Latin America	Pancreatitis	Both	20 to 24	2040	26.3674	rate
DALYs (Disability-Adjusted Life Years)	Eastern Sub-Saharan Africa	Pancreatitis	Male	0 to 4	2040	1.09019	rate
DALYs (Disability-Adjusted Life Years)	Eastern Sub-Saharan Africa	Pancreatitis	Male	5 to 9	2040	1.50291	rate
DALYs (Disability-Adjusted Life Years)	Eastern Sub-Saharan Africa	Pancreatitis	Male	10 to 14	2040	2.20137	rate
DALYs (Disability-Adjusted Life Years)	Eastern Sub-Saharan Africa	Pancreatitis	Male	15 to 19	2040	9.48486	rate
DALYs (Disability-Adjusted Life Years)	Eastern Sub-Saharan Africa	Pancreatitis	Male	20 to 24	2040	23.456	rate
DALYs (Disability-Adjusted Life Years)	Eastern Sub-Saharan Africa	Pancreatitis	Female	0 to 4	2040	0.362244	rate
DALYs (Disability-Adjusted Life Years)	Eastern Sub-Saharan Africa	Pancreatitis	Female	5 to 9	2040	0.787176	rate
DALYs (Disability-Adjusted Life Years)	Eastern Sub-Saharan Africa	Pancreatitis	Female	10 to 14	2040	1.14326	rate
DALYs (Disability-Adjusted Life Years)	Eastern Sub-Saharan Africa	Pancreatitis	Female	15 to 19	2040	2.84358	rate
DALYs (Disability-Adjusted Life Years)	Eastern Sub-Saharan Africa	Pancreatitis	Female	20 to 24	2040	4.08252	rate
DALYs (Disability-Adjusted Life Years)	Eastern Sub-Saharan Africa	Pancreatitis	Both	0 to 4	2040	0.731447	rate
DALYs (Disability-Adjusted Life Years)	Eastern Sub-Saharan Africa	Pancreatitis	Both	5 to 9	2040	1.14994	rate
DALYs (Disability-Adjusted Life Years)	Eastern Sub-Saharan Africa	Pancreatitis	Both	10 to 14	2040	1.67915	rate
DALYs (Disability-Adjusted Life Years)	Eastern Sub-Saharan Africa	Pancreatitis	Both	15 to 19	2040	6.20215	rate
DALYs (Disability-Adjusted Life Years)	Eastern Sub-Saharan Africa	Pancreatitis	Both	20 to 24	2040	13.8619	rate
DALYs (Disability-Adjusted Life Years)	Central Sub-Saharan Africa	Pancreatitis	Male	0 to 4	2040	0.44587	rate
DALYs (Disability-Adjusted Life Years)	Central Sub-Saharan Africa	Pancreatitis	Male	5 to 9	2040	1.01944	rate
DALYs (Disability-Adjusted Life Years)	Central Sub-Saharan Africa	Pancreatitis	Male	10 to 14	2040	1.80382	rate
DALYs (Disability-Adjusted Life Years)	Central Sub-Saharan Africa	Pancreatitis	Male	15 to 19	2040	11.6936	rate
DALYs (Disability-Adjusted Life Years)	Central Sub-Saharan Africa	Pancreatitis	Male	20 to 24	2040	28.9632	rate
DALYs (Disability-Adjusted Life Years)	Central Sub-Saharan Africa	Pancreatitis	Female	0 to 4	2040	0.316134	rate
DALYs (Disability-Adjusted Life Years)	Central Sub-Saharan Africa	Pancreatitis	Female	5 to 9	2040	0.646266	rate
DALYs (Disability-Adjusted Life Years)	Central Sub-Saharan Africa	Pancreatitis	Female	10 to 14	2040	0.928065	rate
DALYs (Disability-Adjusted Life Years)	Central Sub-Saharan Africa	Pancreatitis	Female	15 to 19	2040	2.57643	rate
DALYs (Disability-Adjusted Life Years)	Central Sub-Saharan Africa	Pancreatitis	Female	20 to 24	2040	4.22292	rate
DALYs (Disability-Adjusted Life Years)	Central Sub-Saharan Africa	Pancreatitis	Both	0 to 4	2040	0.381774	rate
DALYs (Disability-Adjusted Life Years)	Central Sub-Saharan Africa	Pancreatitis	Both	5 to 9	2040	0.834908	rate
DALYs (Disability-Adjusted Life Years)	Central Sub-Saharan Africa	Pancreatitis	Both	10 to 14	2040	1.37044	rate
DALYs (Disability-Adjusted Life Years)	Central Sub-Saharan Africa	Pancreatitis	Both	15 to 19	2040	7.17625	rate
DALYs (Disability-Adjusted Life Years)	Central Sub-Saharan Africa	Pancreatitis	Both	20 to 24	2040	16.6712	rate
DALYs (Disability-Adjusted Life Years)	Eastern Europe	Pancreatitis	Male	0 to 4	2040	0.646344	rate
DALYs (Disability-Adjusted Life Years)	Eastern Europe	Pancreatitis	Male	5 to 9	2040	1.97218	rate
DALYs (Disability-Adjusted Life Years)	Eastern Europe	Pancreatitis	Male	10 to 14	2040	3.92063	rate
DALYs (Disability-Adjusted Life Years)	Eastern Europe	Pancreatitis	Male	15 to 19	2040	18.6966	rate
DALYs (Disability-Adjusted Life Years)	Eastern Europe	Pancreatitis	Male	20 to 24	2040	70.6018	rate
DALYs (Disability-Adjusted Life Years)	Eastern Europe	Pancreatitis	Female	0 to 4	2040	1.18178	rate
DALYs (Disability-Adjusted Life Years)	Eastern Europe	Pancreatitis	Female	5 to 9	2040	2.79519	rate
DALYs (Disability-Adjusted Life Years)	Eastern Europe	Pancreatitis	Female	10 to 14	2040	4.41988	rate
DALYs (Disability-Adjusted Life Years)	Eastern Europe	Pancreatitis	Female	15 to 19	2040	13.2032	rate
DALYs (Disability-Adjusted Life Years)	Eastern Europe	Pancreatitis	Female	20 to 24	2040	30.2201	rate
DALYs (Disability-Adjusted Life Years)	Eastern Europe	Pancreatitis	Both	0 to 4	2040	0.906239	rate
DALYs (Disability-Adjusted Life Years)	Eastern Europe	Pancreatitis	Both	5 to 9	2040	2.37171	rate
DALYs (Disability-Adjusted Life Years)	Eastern Europe	Pancreatitis	Both	10 to 14	2040	4.16301	rate
DALYs (Disability-Adjusted Life Years)	Eastern Europe	Pancreatitis	Both	15 to 19	2040	16.0291	rate
DALYs (Disability-Adjusted Life Years)	Eastern Europe	Pancreatitis	Both	20 to 24	2040	50.9409	rate
DALYs (Disability-Adjusted Life Years)	South Asia	Pancreatitis	Male	0 to 4	2040	0.739204	rate
DALYs (Disability-Adjusted Life Years)	South Asia	Pancreatitis	Male	5 to 9	2040	1.41288	rate
DALYs (Disability-Adjusted Life Years)	South Asia	Pancreatitis	Male	10 to 14	2040	1.68566	rate
DALYs (Disability-Adjusted Life Years)	South Asia	Pancreatitis	Male	15 to 19	2040	17.8882	rate
DALYs (Disability-Adjusted Life Years)	South Asia	Pancreatitis	Male	20 to 24	2040	29.001	rate
DALYs (Disability-Adjusted Life Years)	South Asia	Pancreatitis	Female	0 to 4	2040	0.535391	rate
DALYs (Disability-Adjusted Life Years)	South Asia	Pancreatitis	Female	5 to 9	2040	1.16082	rate
DALYs (Disability-Adjusted Life Years)	South Asia	Pancreatitis	Female	10 to 14	2040	1.74399	rate
DALYs (Disability-Adjusted Life Years)	South Asia	Pancreatitis	Female	15 to 19	2040	11.145	rate
DALYs (Disability-Adjusted Life Years)	South Asia	Pancreatitis	Female	20 to 24	2040	13.2574	rate
DALYs (Disability-Adjusted Life Years)	South Asia	Pancreatitis	Both	0 to 4	2040	0.641915	rate
DALYs (Disability-Adjusted Life Years)	South Asia	Pancreatitis	Both	5 to 9	2040	1.2926	rate
DALYs (Disability-Adjusted Life Years)	South Asia	Pancreatitis	Both	10 to 14	2040	1.71349	rate
DALYs (Disability-Adjusted Life Years)	South Asia	Pancreatitis	Both	15 to 19	2040	14.6711	rate
DALYs (Disability-Adjusted Life Years)	South Asia	Pancreatitis	Both	20 to 24	2040	21.4856	rate
DALYs (Disability-Adjusted Life Years)	Australasia	Pancreatitis	Male	0 to 4	2040	0.166592	rate
DALYs (Disability-Adjusted Life Years)	Australasia	Pancreatitis	Male	5 to 9	2040	0.299708	rate
DALYs (Disability-Adjusted Life Years)	Australasia	Pancreatitis	Male	10 to 14	2040	0.457453	rate
DALYs (Disability-Adjusted Life Years)	Australasia	Pancreatitis	Male	15 to 19	2040	1.7021	rate
DALYs (Disability-Adjusted Life Years)	Australasia	Pancreatitis	Male	20 to 24	2040	3.04518	rate
DALYs (Disability-Adjusted Life Years)	Australasia	Pancreatitis	Female	0 to 4	2040	0.213512	rate
DALYs (Disability-Adjusted Life Years)	Australasia	Pancreatitis	Female	5 to 9	2040	0.979154	rate
DALYs (Disability-Adjusted Life Years)	Australasia	Pancreatitis	Female	10 to 14	2040	0.694065	rate
DALYs (Disability-Adjusted Life Years)	Australasia	Pancreatitis	Female	15 to 19	2040	1.22821	rate
DALYs (Disability-Adjusted Life Years)	Australasia	Pancreatitis	Female	20 to 24	2040	2.6041	rate
DALYs (Disability-Adjusted Life Years)	Australasia	Pancreatitis	Both	0 to 4	2040	0.189432	rate
DALYs (Disability-Adjusted Life Years)	Australasia	Pancreatitis	Both	5 to 9	2040	0.63052	rate
DALYs (Disability-Adjusted Life Years)	Australasia	Pancreatitis	Both	10 to 14	2040	0.572657	rate
DALYs (Disability-Adjusted Life Years)	Australasia	Pancreatitis	Both	15 to 19	2040	1.47198	rate
DALYs (Disability-Adjusted Life Years)	Australasia	Pancreatitis	Both	20 to 24	2040	2.83073	rate
DALYs (Disability-Adjusted Life Years)	High-income Asia Pacific	Pancreatitis	Male	0 to 4	2040	0.993933	rate
DALYs (Disability-Adjusted Life Years)	High-income Asia Pacific	Pancreatitis	Male	5 to 9	2040	1.98322	rate
DALYs (Disability-Adjusted Life Years)	High-income Asia Pacific	Pancreatitis	Male	10 to 14	2040	2.63491	rate
DALYs (Disability-Adjusted Life Years)	High-income Asia Pacific	Pancreatitis	Male	15 to 19	2040	4.17945	rate
DALYs (Disability-Adjusted Life Years)	High-income Asia Pacific	Pancreatitis	Male	20 to 24	2040	6.09546	rate
DALYs (Disability-Adjusted Life Years)	High-income Asia Pacific	Pancreatitis	Female	0 to 4	2040	1.09753	rate
DALYs (Disability-Adjusted Life Years)	High-income Asia Pacific	Pancreatitis	Female	5 to 9	2040	2.88147	rate
DALYs (Disability-Adjusted Life Years)	High-income Asia Pacific	Pancreatitis	Female	10 to 14	2040	2.66426	rate
DALYs (Disability-Adjusted Life Years)	High-income Asia Pacific	Pancreatitis	Female	15 to 19	2040	2.74392	rate
DALYs (Disability-Adjusted Life Years)	High-income Asia Pacific	Pancreatitis	Female	20 to 24	2040	3.30456	rate
DALYs (Disability-Adjusted Life Years)	High-income Asia Pacific	Pancreatitis	Both	0 to 4	2040	1.0444	rate
DALYs (Disability-Adjusted Life Years)	High-income Asia Pacific	Pancreatitis	Both	5 to 9	2040	2.42082	rate
DALYs (Disability-Adjusted Life Years)	High-income Asia Pacific	Pancreatitis	Both	10 to 14	2040	2.64921	rate
DALYs (Disability-Adjusted Life Years)	High-income Asia Pacific	Pancreatitis	Both	15 to 19	2040	3.48041	rate
DALYs (Disability-Adjusted Life Years)	High-income Asia Pacific	Pancreatitis	Both	20 to 24	2040	4.7347	rate
DALYs (Disability-Adjusted Life Years)	Central Latin America	Pancreatitis	Male	0 to 4	2040	1.0478	rate
DALYs (Disability-Adjusted Life Years)	Central Latin America	Pancreatitis	Male	5 to 9	2040	3.54411	rate
DALYs (Disability-Adjusted Life Years)	Central Latin America	Pancreatitis	Male	10 to 14	2040	4.55187	rate
DALYs (Disability-Adjusted Life Years)	Central Latin America	Pancreatitis	Male	15 to 19	2040	16.2831	rate
DALYs (Disability-Adjusted Life Years)	Central Latin America	Pancreatitis	Male	20 to 24	2040	38.1138	rate
DALYs (Disability-Adjusted Life Years)	Central Latin America	Pancreatitis	Female	0 to 4	2040	1.3886	rate
DALYs (Disability-Adjusted Life Years)	Central Latin America	Pancreatitis	Female	5 to 9	2040	4.17862	rate
DALYs (Disability-Adjusted Life Years)	Central Latin America	Pancreatitis	Female	10 to 14	2040	5.79624	rate
DALYs (Disability-Adjusted Life Years)	Central Latin America	Pancreatitis	Female	15 to 19	2040	15.2799	rate
DALYs (Disability-Adjusted Life Years)	Central Latin America	Pancreatitis	Female	20 to 24	2040	23.1771	rate
DALYs (Disability-Adjusted Life Years)	Central Latin America	Pancreatitis	Both	0 to 4	2040	1.21461	rate
DALYs (Disability-Adjusted Life Years)	Central Latin America	Pancreatitis	Both	5 to 9	2040	3.85474	rate
DALYs (Disability-Adjusted Life Years)	Central Latin America	Pancreatitis	Both	10 to 14	2040	5.16121	rate
DALYs (Disability-Adjusted Life Years)	Central Latin America	Pancreatitis	Both	15 to 19	2040	15.7912	rate
DALYs (Disability-Adjusted Life Years)	Central Latin America	Pancreatitis	Both	20 to 24	2040	30.7701	rate
DALYs (Disability-Adjusted Life Years)	Caribbean	Pancreatitis	Male	0 to 4	2040	2.22925	rate
DALYs (Disability-Adjusted Life Years)	Caribbean	Pancreatitis	Male	5 to 9	2040	0.631365	rate
DALYs (Disability-Adjusted Life Years)	Caribbean	Pancreatitis	Male	10 to 14	2040	3.27427	rate
DALYs (Disability-Adjusted Life Years)	Caribbean	Pancreatitis	Male	15 to 19	2040	8.65422	rate
DALYs (Disability-Adjusted Life Years)	Caribbean	Pancreatitis	Male	20 to 24	2040	15.9241	rate
DALYs (Disability-Adjusted Life Years)	Caribbean	Pancreatitis	Female	0 to 4	2040	2.67108	rate
DALYs (Disability-Adjusted Life Years)	Caribbean	Pancreatitis	Female	5 to 9	2040	2.33086	rate
DALYs (Disability-Adjusted Life Years)	Caribbean	Pancreatitis	Female	10 to 14	2040	2.95775	rate
DALYs (Disability-Adjusted Life Years)	Caribbean	Pancreatitis	Female	15 to 19	2040	8.86971	rate
DALYs (Disability-Adjusted Life Years)	Caribbean	Pancreatitis	Female	20 to 24	2040	20.7387	rate
DALYs (Disability-Adjusted Life Years)	Caribbean	Pancreatitis	Both	0 to 4	2040	2.44574	rate
DALYs (Disability-Adjusted Life Years)	Caribbean	Pancreatitis	Both	5 to 9	2040	1.46466	rate
DALYs (Disability-Adjusted Life Years)	Caribbean	Pancreatitis	Both	10 to 14	2040	3.11898	rate
DALYs (Disability-Adjusted Life Years)	Caribbean	Pancreatitis	Both	15 to 19	2040	8.76023	rate
DALYs (Disability-Adjusted Life Years)	Caribbean	Pancreatitis	Both	20 to 24	2040	18.2985	rate
DALYs (Disability-Adjusted Life Years)	Southern Sub-Saharan Africa	Pancreatitis	Male	0 to 4	2040	0.217852	rate
DALYs (Disability-Adjusted Life Years)	Southern Sub-Saharan Africa	Pancreatitis	Male	5 to 9	2040	0.82987	rate
DALYs (Disability-Adjusted Life Years)	Southern Sub-Saharan Africa	Pancreatitis	Male	10 to 14	2040	1.57257	rate
DALYs (Disability-Adjusted Life Years)	Southern Sub-Saharan Africa	Pancreatitis	Male	15 to 19	2040	10.7439	rate
DALYs (Disability-Adjusted Life Years)	Southern Sub-Saharan Africa	Pancreatitis	Male	20 to 24	2040	29.3997	rate
DALYs (Disability-Adjusted Life Years)	Southern Sub-Saharan Africa	Pancreatitis	Female	0 to 4	2040	0.103661	rate
DALYs (Disability-Adjusted Life Years)	Southern Sub-Saharan Africa	Pancreatitis	Female	5 to 9	2040	0.359858	rate
DALYs (Disability-Adjusted Life Years)	Southern Sub-Saharan Africa	Pancreatitis	Female	10 to 14	2040	0.693079	rate
DALYs (Disability-Adjusted Life Years)	Southern Sub-Saharan Africa	Pancreatitis	Female	15 to 19	2040	1.27104	rate
DALYs (Disability-Adjusted Life Years)	Southern Sub-Saharan Africa	Pancreatitis	Female	20 to 24	2040	4.14059	rate
DALYs (Disability-Adjusted Life Years)	Southern Sub-Saharan Africa	Pancreatitis	Both	0 to 4	2040	0.161334	rate
DALYs (Disability-Adjusted Life Years)	Southern Sub-Saharan Africa	Pancreatitis	Both	5 to 9	2040	0.597134	rate
DALYs (Disability-Adjusted Life Years)	Southern Sub-Saharan Africa	Pancreatitis	Both	10 to 14	2040	1.1368	rate
DALYs (Disability-Adjusted Life Years)	Southern Sub-Saharan Africa	Pancreatitis	Both	15 to 19	2040	6.04539	rate
DALYs (Disability-Adjusted Life Years)	Southern Sub-Saharan Africa	Pancreatitis	Both	20 to 24	2040	16.8365	rate
DALYs (Disability-Adjusted Life Years)	Tropical Latin America	Pancreatitis	Male	0 to 4	2040	0.288247	rate
DALYs (Disability-Adjusted Life Years)	Tropical Latin America	Pancreatitis	Male	5 to 9	2040	0.830528	rate
DALYs (Disability-Adjusted Life Years)	Tropical Latin America	Pancreatitis	Male	10 to 14	2040	0.944246	rate
DALYs (Disability-Adjusted Life Years)	Tropical Latin America	Pancreatitis	Male	15 to 19	2040	7.3283	rate
DALYs (Disability-Adjusted Life Years)	Tropical Latin America	Pancreatitis	Male	20 to 24	2040	17.3454	rate
DALYs (Disability-Adjusted Life Years)	Tropical Latin America	Pancreatitis	Female	0 to 4	2040	0.492047	rate
DALYs (Disability-Adjusted Life Years)	Tropical Latin America	Pancreatitis	Female	5 to 9	2040	1.93714	rate
DALYs (Disability-Adjusted Life Years)	Tropical Latin America	Pancreatitis	Female	10 to 14	2040	2.68828	rate
DALYs (Disability-Adjusted Life Years)	Tropical Latin America	Pancreatitis	Female	15 to 19	2040	8.45988	rate
DALYs (Disability-Adjusted Life Years)	Tropical Latin America	Pancreatitis	Female	20 to 24	2040	15.293	rate
DALYs (Disability-Adjusted Life Years)	Tropical Latin America	Pancreatitis	Both	0 to 4	2040	0.387752	rate
DALYs (Disability-Adjusted Life Years)	Tropical Latin America	Pancreatitis	Both	5 to 9	2040	1.37093	rate
DALYs (Disability-Adjusted Life Years)	Tropical Latin America	Pancreatitis	Both	10 to 14	2040	1.79618	rate
DALYs (Disability-Adjusted Life Years)	Tropical Latin America	Pancreatitis	Both	15 to 19	2040	7.88202	rate
DALYs (Disability-Adjusted Life Years)	Tropical Latin America	Pancreatitis	Both	20 to 24	2040	16.3367	rate
DALYs (Disability-Adjusted Life Years)	Southeast Asia	Pancreatitis	Male	0 to 4	2040	0.542693	rate
DALYs (Disability-Adjusted Life Years)	Southeast Asia	Pancreatitis	Male	5 to 9	2040	1.01669	rate
DALYs (Disability-Adjusted Life Years)	Southeast Asia	Pancreatitis	Male	10 to 14	2040	1.97228	rate
DALYs (Disability-Adjusted Life Years)	Southeast Asia	Pancreatitis	Male	15 to 19	2040	10.5533	rate
DALYs (Disability-Adjusted Life Years)	Southeast Asia	Pancreatitis	Male	20 to 24	2040	24.4217	rate
DALYs (Disability-Adjusted Life Years)	Southeast Asia	Pancreatitis	Female	0 to 4	2040	0.206477	rate
DALYs (Disability-Adjusted Life Years)	Southeast Asia	Pancreatitis	Female	5 to 9	2040	0.840848	rate
DALYs (Disability-Adjusted Life Years)	Southeast Asia	Pancreatitis	Female	10 to 14	2040	1.13385	rate
DALYs (Disability-Adjusted Life Years)	Southeast Asia	Pancreatitis	Female	15 to 19	2040	2.64742	rate
DALYs (Disability-Adjusted Life Years)	Southeast Asia	Pancreatitis	Female	20 to 24	2040	5.94758	rate
DALYs (Disability-Adjusted Life Years)	Southeast Asia	Pancreatitis	Both	0 to 4	2040	0.379549	rate
DALYs (Disability-Adjusted Life Years)	Southeast Asia	Pancreatitis	Both	5 to 9	2040	0.931313	rate
DALYs (Disability-Adjusted Life Years)	Southeast Asia	Pancreatitis	Both	10 to 14	2040	1.56497	rate
DALYs (Disability-Adjusted Life Years)	Southeast Asia	Pancreatitis	Both	15 to 19	2040	6.70713	rate
DALYs (Disability-Adjusted Life Years)	Southeast Asia	Pancreatitis	Both	20 to 24	2040	15.4187	rate
Incidence	Global	Pancreatitis	Male	0 to 4	2040	2.04639	rate
Incidence	Global	Pancreatitis	Male	5 to 9	2040	5.19609	rate
Incidence	Global	Pancreatitis	Male	10 to 14	2040	8.28192	rate
Incidence	Global	Pancreatitis	Male	15 to 19	2040	12.683	rate
Incidence	Global	Pancreatitis	Male	20 to 24	2040	19.0057	rate
Incidence	Global	Pancreatitis	Female	0 to 4	2040	2.37699	rate
Incidence	Global	Pancreatitis	Female	5 to 9	2040	6.00251	rate
Incidence	Global	Pancreatitis	Female	10 to 14	2040	9.32731	rate
Incidence	Global	Pancreatitis	Female	15 to 19	2040	13.5411	rate
Incidence	Global	Pancreatitis	Female	20 to 24	2040	17.4891	rate
Incidence	Global	Pancreatitis	Both	0 to 4	2040	2.20665	rate
Incidence	Global	Pancreatitis	Both	5 to 9	2040	5.587	rate
Incidence	Global	Pancreatitis	Both	10 to 14	2040	8.78844	rate
Incidence	Global	Pancreatitis	Both	15 to 19	2040	13.0985	rate
Incidence	Global	Pancreatitis	Both	20 to 24	2040	18.2715	rate
Incidence	Central Europe	Pancreatitis	Male	0 to 4	2040	2.53192	rate
Incidence	Central Europe	Pancreatitis	Male	5 to 9	2040	4.58174	rate
Incidence	Central Europe	Pancreatitis	Male	10 to 14	2040	5.93431	rate
Incidence	Central Europe	Pancreatitis	Male	15 to 19	2040	10.1887	rate
Incidence	Central Europe	Pancreatitis	Male	20 to 24	2040	20.538	rate
Incidence	Central Europe	Pancreatitis	Female	0 to 4	2040	2.89094	rate
Incidence	Central Europe	Pancreatitis	Female	5 to 9	2040	5.40993	rate
Incidence	Central Europe	Pancreatitis	Female	10 to 14	2040	6.60524	rate
Incidence	Central Europe	Pancreatitis	Female	15 to 19	2040	9.82329	rate
Incidence	Central Europe	Pancreatitis	Female	20 to 24	2040	14.7652	rate
Incidence	Central Europe	Pancreatitis	Both	0 to 4	2040	2.70626	rate
Incidence	Central Europe	Pancreatitis	Both	5 to 9	2040	4.98389	rate
Incidence	Central Europe	Pancreatitis	Both	10 to 14	2040	6.26012	rate
Incidence	Central Europe	Pancreatitis	Both	15 to 19	2040	10.0111	rate
Incidence	Central Europe	Pancreatitis	Both	20 to 24	2040	17.7285	rate
Incidence	Central Asia	Pancreatitis	Male	0 to 4	2040	4.38378	rate
Incidence	Central Asia	Pancreatitis	Male	5 to 9	2040	7.92972	rate
Incidence	Central Asia	Pancreatitis	Male	10 to 14	2040	10.1504	rate
Incidence	Central Asia	Pancreatitis	Male	15 to 19	2040	15.6435	rate
Incidence	Central Asia	Pancreatitis	Male	20 to 24	2040	27.2004	rate
Incidence	Central Asia	Pancreatitis	Female	0 to 4	2040	3.71079	rate
Incidence	Central Asia	Pancreatitis	Female	5 to 9	2040	7.5617	rate
Incidence	Central Asia	Pancreatitis	Female	10 to 14	2040	9.71399	rate
Incidence	Central Asia	Pancreatitis	Female	15 to 19	2040	13.6157	rate
Incidence	Central Asia	Pancreatitis	Female	20 to 24	2040	20.2758	rate
Incidence	Central Asia	Pancreatitis	Both	0 to 4	2040	4.05931	rate
Incidence	Central Asia	Pancreatitis	Both	5 to 9	2040	7.75225	rate
Incidence	Central Asia	Pancreatitis	Both	10 to 14	2040	9.93988	rate
Incidence	Central Asia	Pancreatitis	Both	15 to 19	2040	14.664	rate
Incidence	Central Asia	Pancreatitis	Both	20 to 24	2040	23.8517	rate
Incidence	High-income North America	Pancreatitis	Male	0 to 4	2040	1.84212	rate
Incidence	High-income North America	Pancreatitis	Male	5 to 9	2040	4.52898	rate
Incidence	High-income North America	Pancreatitis	Male	10 to 14	2040	7.47789	rate
Incidence	High-income North America	Pancreatitis	Male	15 to 19	2040	14.4224	rate
Incidence	High-income North America	Pancreatitis	Male	20 to 24	2040	24.5013	rate
Incidence	High-income North America	Pancreatitis	Female	0 to 4	2040	1.94816	rate
Incidence	High-income North America	Pancreatitis	Female	5 to 9	2040	4.92158	rate
Incidence	High-income North America	Pancreatitis	Female	10 to 14	2040	9.44334	rate
Incidence	High-income North America	Pancreatitis	Female	15 to 19	2040	21.1638	rate
Incidence	High-income North America	Pancreatitis	Female	20 to 24	2040	35.3991	rate
Incidence	High-income North America	Pancreatitis	Both	0 to 4	2040	1.89391	rate
Incidence	High-income North America	Pancreatitis	Both	5 to 9	2040	4.72074	rate
Incidence	High-income North America	Pancreatitis	Both	10 to 14	2040	8.43788	rate
Incidence	High-income North America	Pancreatitis	Both	15 to 19	2040	17.7099	rate
Incidence	High-income North America	Pancreatitis	Both	20 to 24	2040	29.8251	rate
Incidence	Western Sub-Saharan Africa	Pancreatitis	Male	0 to 4	2040	1.6772	rate
Incidence	Western Sub-Saharan Africa	Pancreatitis	Male	5 to 9	2040	4.3484	rate
Incidence	Western Sub-Saharan Africa	Pancreatitis	Male	10 to 14	2040	6.50819	rate
Incidence	Western Sub-Saharan Africa	Pancreatitis	Male	15 to 19	2040	9.22326	rate
Incidence	Western Sub-Saharan Africa	Pancreatitis	Male	20 to 24	2040	12.4592	rate
Incidence	Western Sub-Saharan Africa	Pancreatitis	Female	0 to 4	2040	2.22124	rate
Incidence	Western Sub-Saharan Africa	Pancreatitis	Female	5 to 9	2040	5.54561	rate
Incidence	Western Sub-Saharan Africa	Pancreatitis	Female	10 to 14	2040	8.12047	rate
Incidence	Western Sub-Saharan Africa	Pancreatitis	Female	15 to 19	2040	11.3513	rate
Incidence	Western Sub-Saharan Africa	Pancreatitis	Female	20 to 24	2040	15.1017	rate
Incidence	Western Sub-Saharan Africa	Pancreatitis	Both	0 to 4	2040	1.94415	rate
Incidence	Western Sub-Saharan Africa	Pancreatitis	Both	5 to 9	2040	4.93674	rate
Incidence	Western Sub-Saharan Africa	Pancreatitis	Both	10 to 14	2040	7.30149	rate
Incidence	Western Sub-Saharan Africa	Pancreatitis	Both	15 to 19	2040	10.2719	rate
Incidence	Western Sub-Saharan Africa	Pancreatitis	Both	20 to 24	2040	13.7647	rate
Incidence	Oceania	Pancreatitis	Male	0 to 4	2040	1.3511	rate
Incidence	Oceania	Pancreatitis	Male	5 to 9	2040	3.04068	rate
Incidence	Oceania	Pancreatitis	Male	10 to 14	2040	4.2635	rate
Incidence	Oceania	Pancreatitis	Male	15 to 19	2040	6.20836	rate
Incidence	Oceania	Pancreatitis	Male	20 to 24	2040	9.37616	rate
Incidence	Oceania	Pancreatitis	Female	0 to 4	2040	1.68746	rate
Incidence	Oceania	Pancreatitis	Female	5 to 9	2040	3.75101	rate
Incidence	Oceania	Pancreatitis	Female	10 to 14	2040	4.94041	rate
Incidence	Oceania	Pancreatitis	Female	15 to 19	2040	6.40678	rate
Incidence	Oceania	Pancreatitis	Female	20 to 24	2040	8.16482	rate
Incidence	Oceania	Pancreatitis	Both	0 to 4	2040	1.51381	rate
Incidence	Oceania	Pancreatitis	Both	5 to 9	2040	3.38447	rate
Incidence	Oceania	Pancreatitis	Both	10 to 14	2040	4.59142	rate
Incidence	Oceania	Pancreatitis	Both	15 to 19	2040	6.30465	rate
Incidence	Oceania	Pancreatitis	Both	20 to 24	2040	8.78672	rate
Incidence	East Asia	Pancreatitis	Male	0 to 4	2040	1.876	rate
Incidence	East Asia	Pancreatitis	Male	5 to 9	2040	3.3331	rate
Incidence	East Asia	Pancreatitis	Male	10 to 14	2040	4.39548	rate
Incidence	East Asia	Pancreatitis	Male	15 to 19	2040	6.56656	rate
Incidence	East Asia	Pancreatitis	Male	20 to 24	2040	10.5091	rate
Incidence	East Asia	Pancreatitis	Female	0 to 4	2040	2.22232	rate
Incidence	East Asia	Pancreatitis	Female	5 to 9	2040	3.8645	rate
Incidence	East Asia	Pancreatitis	Female	10 to 14	2040	4.55146	rate
Incidence	East Asia	Pancreatitis	Female	15 to 19	2040	5.70677	rate
Incidence	East Asia	Pancreatitis	Female	20 to 24	2040	7.19379	rate
Incidence	East Asia	Pancreatitis	Both	0 to 4	2040	2.03599	rate
Incidence	East Asia	Pancreatitis	Both	5 to 9	2040	3.57865	rate
Incidence	East Asia	Pancreatitis	Both	10 to 14	2040	4.46757	rate
Incidence	East Asia	Pancreatitis	Both	15 to 19	2040	6.16898	rate
Incidence	East Asia	Pancreatitis	Both	20 to 24	2040	8.97556	rate
Incidence	North Africa and Middle East	Pancreatitis	Male	0 to 4	2040	2.03117	rate
Incidence	North Africa and Middle East	Pancreatitis	Male	5 to 9	2040	5.20156	rate
Incidence	North Africa and Middle East	Pancreatitis	Male	10 to 14	2040	7.98811	rate
Incidence	North Africa and Middle East	Pancreatitis	Male	15 to 19	2040	11.0708	rate
Incidence	North Africa and Middle East	Pancreatitis	Male	20 to 24	2040	13.9498	rate
Incidence	North Africa and Middle East	Pancreatitis	Female	0 to 4	2040	1.83218	rate
Incidence	North Africa and Middle East	Pancreatitis	Female	5 to 9	2040	4.90892	rate
Incidence	North Africa and Middle East	Pancreatitis	Female	10 to 14	2040	6.95174	rate
Incidence	North Africa and Middle East	Pancreatitis	Female	15 to 19	2040	9.08771	rate
Incidence	North Africa and Middle East	Pancreatitis	Female	20 to 24	2040	11.3225	rate
Incidence	North Africa and Middle East	Pancreatitis	Both	0 to 4	2040	1.93437	rate
Incidence	North Africa and Middle East	Pancreatitis	Both	5 to 9	2040	5.05916	rate
Incidence	North Africa and Middle East	Pancreatitis	Both	10 to 14	2040	7.48362	rate
Incidence	North Africa and Middle East	Pancreatitis	Both	15 to 19	2040	10.1049	rate
Incidence	North Africa and Middle East	Pancreatitis	Both	20 to 24	2040	12.6696	rate
Incidence	Western Europe	Pancreatitis	Male	0 to 4	2040	1.50687	rate
Incidence	Western Europe	Pancreatitis	Male	5 to 9	2040	3.23761	rate
Incidence	Western Europe	Pancreatitis	Male	10 to 14	2040	4.96606	rate
Incidence	Western Europe	Pancreatitis	Male	15 to 19	2040	8.9934	rate
Incidence	Western Europe	Pancreatitis	Male	20 to 24	2040	15.5277	rate
Incidence	Western Europe	Pancreatitis	Female	0 to 4	2040	1.91382	rate
Incidence	Western Europe	Pancreatitis	Female	5 to 9	2040	4.54693	rate
Incidence	Western Europe	Pancreatitis	Female	10 to 14	2040	6.63949	rate
Incidence	Western Europe	Pancreatitis	Female	15 to 19	2040	11.7432	rate
Incidence	Western Europe	Pancreatitis	Female	20 to 24	2040	17.6618	rate
Incidence	Western Europe	Pancreatitis	Both	0 to 4	2040	1.7051	rate
Incidence	Western Europe	Pancreatitis	Both	5 to 9	2040	3.87547	rate
Incidence	Western Europe	Pancreatitis	Both	10 to 14	2040	5.7813	rate
Incidence	Western Europe	Pancreatitis	Both	15 to 19	2040	10.331	rate
Incidence	Western Europe	Pancreatitis	Both	20 to 24	2040	16.5668	rate
Incidence	Southern Latin America	Pancreatitis	Male	0 to 4	2040	1.41548	rate
Incidence	Southern Latin America	Pancreatitis	Male	5 to 9	2040	3.44119	rate
Incidence	Southern Latin America	Pancreatitis	Male	10 to 14	2040	5.40778	rate
Incidence	Southern Latin America	Pancreatitis	Male	15 to 19	2040	8.40438	rate
Incidence	Southern Latin America	Pancreatitis	Male	20 to 24	2040	12.7148	rate
Incidence	Southern Latin America	Pancreatitis	Female	0 to 4	2040	3.41719	rate
Incidence	Southern Latin America	Pancreatitis	Female	5 to 9	2040	8.86956	rate
Incidence	Southern Latin America	Pancreatitis	Female	10 to 14	2040	15.1889	rate
Incidence	Southern Latin America	Pancreatitis	Female	15 to 19	2040	25.5213	rate
Incidence	Southern Latin America	Pancreatitis	Female	20 to 24	2040	36.7485	rate
Incidence	Southern Latin America	Pancreatitis	Both	0 to 4	2040	2.39706	rate
Incidence	Southern Latin America	Pancreatitis	Both	5 to 9	2040	6.1034	rate
Incidence	Southern Latin America	Pancreatitis	Both	10 to 14	2040	10.2053	rate
Incidence	Southern Latin America	Pancreatitis	Both	15 to 19	2040	16.8051	rate
Incidence	Southern Latin America	Pancreatitis	Both	20 to 24	2040	24.5347	rate
Incidence	Andean Latin America	Pancreatitis	Male	0 to 4	2040	1.51907	rate
Incidence	Andean Latin America	Pancreatitis	Male	5 to 9	2040	4.17638	rate
Incidence	Andean Latin America	Pancreatitis	Male	10 to 14	2040	7.01335	rate
Incidence	Andean Latin America	Pancreatitis	Male	15 to 19	2040	12.0113	rate
Incidence	Andean Latin America	Pancreatitis	Male	20 to 24	2040	18.8707	rate
Incidence	Andean Latin America	Pancreatitis	Female	0 to 4	2040	2.11797	rate
Incidence	Andean Latin America	Pancreatitis	Female	5 to 9	2040	5.93272	rate
Incidence	Andean Latin America	Pancreatitis	Female	10 to 14	2040	10.8354	rate
Incidence	Andean Latin America	Pancreatitis	Female	15 to 19	2040	20.4566	rate
Incidence	Andean Latin America	Pancreatitis	Female	20 to 24	2040	31.3347	rate
Incidence	Andean Latin America	Pancreatitis	Both	0 to 4	2040	1.81251	rate
Incidence	Andean Latin America	Pancreatitis	Both	5 to 9	2040	5.03722	rate
Incidence	Andean Latin America	Pancreatitis	Both	10 to 14	2040	8.88734	rate
Incidence	Andean Latin America	Pancreatitis	Both	15 to 19	2040	16.1569	rate
Incidence	Andean Latin America	Pancreatitis	Both	20 to 24	2040	24.9917	rate
Incidence	Eastern Sub-Saharan Africa	Pancreatitis	Male	0 to 4	2040	1.44944	rate
Incidence	Eastern Sub-Saharan Africa	Pancreatitis	Male	5 to 9	2040	3.67119	rate
Incidence	Eastern Sub-Saharan Africa	Pancreatitis	Male	10 to 14	2040	5.46664	rate
Incidence	Eastern Sub-Saharan Africa	Pancreatitis	Male	15 to 19	2040	7.69373	rate
Incidence	Eastern Sub-Saharan Africa	Pancreatitis	Male	20 to 24	2040	10.344	rate
Incidence	Eastern Sub-Saharan Africa	Pancreatitis	Female	0 to 4	2040	1.78308	rate
Incidence	Eastern Sub-Saharan Africa	Pancreatitis	Female	5 to 9	2040	4.43717	rate
Incidence	Eastern Sub-Saharan Africa	Pancreatitis	Female	10 to 14	2040	6.55688	rate
Incidence	Eastern Sub-Saharan Africa	Pancreatitis	Female	15 to 19	2040	9.19943	rate
Incidence	Eastern Sub-Saharan Africa	Pancreatitis	Female	20 to 24	2040	12.2883	rate
Incidence	Eastern Sub-Saharan Africa	Pancreatitis	Both	0 to 4	2040	1.61387	rate
Incidence	Eastern Sub-Saharan Africa	Pancreatitis	Both	5 to 9	2040	4.04894	rate
Incidence	Eastern Sub-Saharan Africa	Pancreatitis	Both	10 to 14	2040	6.00473	rate
Incidence	Eastern Sub-Saharan Africa	Pancreatitis	Both	15 to 19	2040	8.43798	rate
Incidence	Eastern Sub-Saharan Africa	Pancreatitis	Both	20 to 24	2040	11.3069	rate
Incidence	Central Sub-Saharan Africa	Pancreatitis	Male	0 to 4	2040	1.36733	rate
Incidence	Central Sub-Saharan Africa	Pancreatitis	Male	5 to 9	2040	3.48401	rate
Incidence	Central Sub-Saharan Africa	Pancreatitis	Male	10 to 14	2040	5.22027	rate
Incidence	Central Sub-Saharan Africa	Pancreatitis	Male	15 to 19	2040	7.44795	rate
Incidence	Central Sub-Saharan Africa	Pancreatitis	Male	20 to 24	2040	10.1565	rate
Incidence	Central Sub-Saharan Africa	Pancreatitis	Female	0 to 4	2040	1.58063	rate
Incidence	Central Sub-Saharan Africa	Pancreatitis	Female	5 to 9	2040	3.96652	rate
Incidence	Central Sub-Saharan Africa	Pancreatitis	Female	10 to 14	2040	5.86348	rate
Incidence	Central Sub-Saharan Africa	Pancreatitis	Female	15 to 19	2040	8.30841	rate
Incidence	Central Sub-Saharan Africa	Pancreatitis	Female	20 to 24	2040	11.2454	rate
Incidence	Central Sub-Saharan Africa	Pancreatitis	Both	0 to 4	2040	1.47271	rate
Incidence	Central Sub-Saharan Africa	Pancreatitis	Both	5 to 9	2040	3.72261	rate
Incidence	Central Sub-Saharan Africa	Pancreatitis	Both	10 to 14	2040	5.53857	rate
Incidence	Central Sub-Saharan Africa	Pancreatitis	Both	15 to 19	2040	7.87429	rate
Incidence	Central Sub-Saharan Africa	Pancreatitis	Both	20 to 24	2040	10.6975	rate
Incidence	Eastern Europe	Pancreatitis	Male	0 to 4	2040	7.25155	rate
Incidence	Eastern Europe	Pancreatitis	Male	5 to 9	2040	14.2379	rate
Incidence	Eastern Europe	Pancreatitis	Male	10 to 14	2040	19.7184	rate
Incidence	Eastern Europe	Pancreatitis	Male	15 to 19	2040	31.4166	rate
Incidence	Eastern Europe	Pancreatitis	Male	20 to 24	2040	57.8109	rate
Incidence	Eastern Europe	Pancreatitis	Female	0 to 4	2040	7.83883	rate
Incidence	Eastern Europe	Pancreatitis	Female	5 to 9	2040	15.4912	rate
Incidence	Eastern Europe	Pancreatitis	Female	10 to 14	2040	19.8687	rate
Incidence	Eastern Europe	Pancreatitis	Female	15 to 19	2040	26.3531	rate
Incidence	Eastern Europe	Pancreatitis	Female	20 to 24	2040	36.8776	rate
Incidence	Eastern Europe	Pancreatitis	Both	0 to 4	2040	7.53661	rate
Incidence	Eastern Europe	Pancreatitis	Both	5 to 9	2040	14.8463	rate
Incidence	Eastern Europe	Pancreatitis	Both	10 to 14	2040	19.7914	rate
Incidence	Eastern Europe	Pancreatitis	Both	15 to 19	2040	28.9578	rate
Incidence	Eastern Europe	Pancreatitis	Both	20 to 24	2040	47.619	rate
Incidence	South Asia	Pancreatitis	Male	0 to 4	2040	2.55268	rate
Incidence	South Asia	Pancreatitis	Male	5 to 9	2040	7.85828	rate
Incidence	South Asia	Pancreatitis	Male	10 to 14	2040	13.7965	rate
Incidence	South Asia	Pancreatitis	Male	15 to 19	2040	21.1615	rate
Incidence	South Asia	Pancreatitis	Male	20 to 24	2040	30.1228	rate
Incidence	South Asia	Pancreatitis	Female	0 to 4	2040	2.53766	rate
Incidence	South Asia	Pancreatitis	Female	5 to 9	2040	7.65976	rate
Incidence	South Asia	Pancreatitis	Female	10 to 14	2040	14.0887	rate
Incidence	South Asia	Pancreatitis	Female	15 to 19	2040	21.7146	rate
Incidence	South Asia	Pancreatitis	Female	20 to 24	2040	26.2227	rate
Incidence	South Asia	Pancreatitis	Both	0 to 4	2040	2.54551	rate
Incidence	South Asia	Pancreatitis	Both	5 to 9	2040	7.76355	rate
Incidence	South Asia	Pancreatitis	Both	10 to 14	2040	13.9359	rate
Incidence	South Asia	Pancreatitis	Both	15 to 19	2040	21.4254	rate
Incidence	South Asia	Pancreatitis	Both	20 to 24	2040	28.2611	rate
Incidence	Australasia	Pancreatitis	Male	0 to 4	2040	1.18701	rate
Incidence	Australasia	Pancreatitis	Male	5 to 9	2040	2.70268	rate
Incidence	Australasia	Pancreatitis	Male	10 to 14	2040	4.53363	rate
Incidence	Australasia	Pancreatitis	Male	15 to 19	2040	8.9007	rate
Incidence	Australasia	Pancreatitis	Male	20 to 24	2040	14.7927	rate
Incidence	Australasia	Pancreatitis	Female	0 to 4	2040	2.15401	rate
Incidence	Australasia	Pancreatitis	Female	5 to 9	2040	4.43229	rate
Incidence	Australasia	Pancreatitis	Female	10 to 14	2040	7.51082	rate
Incidence	Australasia	Pancreatitis	Female	15 to 19	2040	15.8561	rate
Incidence	Australasia	Pancreatitis	Female	20 to 24	2040	25.8403	rate
Incidence	Australasia	Pancreatitis	Both	0 to 4	2040	1.65772	rate
Incidence	Australasia	Pancreatitis	Both	5 to 9	2040	3.5448	rate
Incidence	Australasia	Pancreatitis	Both	10 to 14	2040	5.98319	rate
Incidence	Australasia	Pancreatitis	Both	15 to 19	2040	12.2783	rate
Incidence	Australasia	Pancreatitis	Both	20 to 24	2040	20.1641	rate
Incidence	High-income Asia Pacific	Pancreatitis	Male	0 to 4	2040	5.18857	rate
Incidence	High-income Asia Pacific	Pancreatitis	Male	5 to 9	2040	9.91738	rate
Incidence	High-income Asia Pacific	Pancreatitis	Male	10 to 14	2040	12.4551	rate
Incidence	High-income Asia Pacific	Pancreatitis	Male	15 to 19	2040	16.8811	rate
Incidence	High-income Asia Pacific	Pancreatitis	Male	20 to 24	2040	22.6502	rate
Incidence	High-income Asia Pacific	Pancreatitis	Female	0 to 4	2040	6.7467	rate
Incidence	High-income Asia Pacific	Pancreatitis	Female	5 to 9	2040	13.1658	rate
Incidence	High-income Asia Pacific	Pancreatitis	Female	10 to 14	2040	14.0189	rate
Incidence	High-income Asia Pacific	Pancreatitis	Female	15 to 19	2040	13.2919	rate
Incidence	High-income Asia Pacific	Pancreatitis	Female	20 to 24	2040	12.5194	rate
Incidence	High-income Asia Pacific	Pancreatitis	Both	0 to 4	2040	5.94764	rate
Incidence	High-income Asia Pacific	Pancreatitis	Both	5 to 9	2040	11.4999	rate
Incidence	High-income Asia Pacific	Pancreatitis	Both	10 to 14	2040	13.2169	rate
Incidence	High-income Asia Pacific	Pancreatitis	Both	15 to 19	2040	15.1333	rate
Incidence	High-income Asia Pacific	Pancreatitis	Both	20 to 24	2040	17.7107	rate
Incidence	Central Latin America	Pancreatitis	Male	0 to 4	2040	2.6515	rate
Incidence	Central Latin America	Pancreatitis	Male	5 to 9	2040	5.65369	rate
Incidence	Central Latin America	Pancreatitis	Male	10 to 14	2040	8.32238	rate
Incidence	Central Latin America	Pancreatitis	Male	15 to 19	2040	13.9039	rate
Incidence	Central Latin America	Pancreatitis	Male	20 to 24	2040	24.8858	rate
Incidence	Central Latin America	Pancreatitis	Female	0 to 4	2040	6.06017	rate
Incidence	Central Latin America	Pancreatitis	Female	5 to 9	2040	14.5448	rate
Incidence	Central Latin America	Pancreatitis	Female	10 to 14	2040	17.0579	rate
Incidence	Central Latin America	Pancreatitis	Female	15 to 19	2040	17.0367	rate
Incidence	Central Latin America	Pancreatitis	Female	20 to 24	2040	21.1901	rate
Incidence	Central Latin America	Pancreatitis	Both	0 to 4	2040	4.31992	rate
Incidence	Central Latin America	Pancreatitis	Both	5 to 9	2040	10.0064	rate
Incidence	Central Latin America	Pancreatitis	Both	10 to 14	2040	12.6	rate
Incidence	Central Latin America	Pancreatitis	Both	15 to 19	2040	15.44	rate
Incidence	Central Latin America	Pancreatitis	Both	20 to 24	2040	23.0688	rate
Incidence	Caribbean	Pancreatitis	Male	0 to 4	2040	1.77354	rate
Incidence	Caribbean	Pancreatitis	Male	5 to 9	2040	4.33541	rate
Incidence	Caribbean	Pancreatitis	Male	10 to 14	2040	6.54731	rate
Incidence	Caribbean	Pancreatitis	Male	15 to 19	2040	9.92341	rate
Incidence	Caribbean	Pancreatitis	Male	20 to 24	2040	15.1681	rate
Incidence	Caribbean	Pancreatitis	Female	0 to 4	2040	2.98178	rate
Incidence	Caribbean	Pancreatitis	Female	5 to 9	2040	7.54781	rate
Incidence	Caribbean	Pancreatitis	Female	10 to 14	2040	10.4539	rate
Incidence	Caribbean	Pancreatitis	Female	15 to 19	2040	13.0492	rate
Incidence	Caribbean	Pancreatitis	Female	20 to 24	2040	15.8266	rate
Incidence	Caribbean	Pancreatitis	Both	0 to 4	2040	2.36555	rate
Incidence	Caribbean	Pancreatitis	Both	5 to 9	2040	5.91051	rate
Incidence	Caribbean	Pancreatitis	Both	10 to 14	2040	8.46394	rate
Incidence	Caribbean	Pancreatitis	Both	15 to 19	2040	11.4612	rate
Incidence	Caribbean	Pancreatitis	Both	20 to 24	2040	15.4929	rate
Incidence	Southern Sub-Saharan Africa	Pancreatitis	Male	0 to 4	2040	1.57147	rate
Incidence	Southern Sub-Saharan Africa	Pancreatitis	Male	5 to 9	2040	3.85786	rate
Incidence	Southern Sub-Saharan Africa	Pancreatitis	Male	10 to 14	2040	5.6871	rate
Incidence	Southern Sub-Saharan Africa	Pancreatitis	Male	15 to 19	2040	7.9361	rate
Incidence	Southern Sub-Saharan Africa	Pancreatitis	Male	20 to 24	2040	10.6207	rate
Incidence	Southern Sub-Saharan Africa	Pancreatitis	Female	0 to 4	2040	2.02686	rate
Incidence	Southern Sub-Saharan Africa	Pancreatitis	Female	5 to 9	2040	4.90618	rate
Incidence	Southern Sub-Saharan Africa	Pancreatitis	Female	10 to 14	2040	7.14559	rate
Incidence	Southern Sub-Saharan Africa	Pancreatitis	Female	15 to 19	2040	9.93361	rate
Incidence	Southern Sub-Saharan Africa	Pancreatitis	Female	20 to 24	2040	13.1921	rate
Incidence	Southern Sub-Saharan Africa	Pancreatitis	Both	0 to 4	2040	1.79687	rate
Incidence	Southern Sub-Saharan Africa	Pancreatitis	Both	5 to 9	2040	4.37696	rate
Incidence	Southern Sub-Saharan Africa	Pancreatitis	Both	10 to 14	2040	6.40975	rate
Incidence	Southern Sub-Saharan Africa	Pancreatitis	Both	15 to 19	2040	8.92685	rate
Incidence	Southern Sub-Saharan Africa	Pancreatitis	Both	20 to 24	2040	11.8997	rate
Incidence	Tropical Latin America	Pancreatitis	Male	0 to 4	2040	0.738025	rate
Incidence	Tropical Latin America	Pancreatitis	Male	5 to 9	2040	1.43701	rate
Incidence	Tropical Latin America	Pancreatitis	Male	10 to 14	2040	1.90913	rate
Incidence	Tropical Latin America	Pancreatitis	Male	15 to 19	2040	3.31826	rate
Incidence	Tropical Latin America	Pancreatitis	Male	20 to 24	2040	6.99424	rate
Incidence	Tropical Latin America	Pancreatitis	Female	0 to 4	2040	0.966856	rate
Incidence	Tropical Latin America	Pancreatitis	Female	5 to 9	2040	1.93731	rate
Incidence	Tropical Latin America	Pancreatitis	Female	10 to 14	2040	2.88255	rate
Incidence	Tropical Latin America	Pancreatitis	Female	15 to 19	2040	4.77205	rate
Incidence	Tropical Latin America	Pancreatitis	Female	20 to 24	2040	7.30889	rate
Incidence	Tropical Latin America	Pancreatitis	Both	0 to 4	2040	0.849751	rate
Incidence	Tropical Latin America	Pancreatitis	Both	5 to 9	2040	1.68132	rate
Incidence	Tropical Latin America	Pancreatitis	Both	10 to 14	2040	2.38463	rate
Incidence	Tropical Latin America	Pancreatitis	Both	15 to 19	2040	4.02966	rate
Incidence	Tropical Latin America	Pancreatitis	Both	20 to 24	2040	7.14888	rate
Incidence	Southeast Asia	Pancreatitis	Male	0 to 4	2040	1.24263	rate
Incidence	Southeast Asia	Pancreatitis	Male	5 to 9	2040	3.21381	rate
Incidence	Southeast Asia	Pancreatitis	Male	10 to 14	2040	5.33041	rate
Incidence	Southeast Asia	Pancreatitis	Male	15 to 19	2040	8.68553	rate
Incidence	Southeast Asia	Pancreatitis	Male	20 to 24	2040	13.7558	rate
Incidence	Southeast Asia	Pancreatitis	Female	0 to 4	2040	1.88293	rate
Incidence	Southeast Asia	Pancreatitis	Female	5 to 9	2040	4.79582	rate
Incidence	Southeast Asia	Pancreatitis	Female	10 to 14	2040	7.13384	rate
Incidence	Southeast Asia	Pancreatitis	Female	15 to 19	2040	9.34242	rate
Incidence	Southeast Asia	Pancreatitis	Female	20 to 24	2040	11.5244	rate
Incidence	Southeast Asia	Pancreatitis	Both	0 to 4	2040	1.55332	rate
Incidence	Southeast Asia	Pancreatitis	Both	5 to 9	2040	3.98192	rate
Incidence	Southeast Asia	Pancreatitis	Both	10 to 14	2040	6.20652	rate
Incidence	Southeast Asia	Pancreatitis	Both	15 to 19	2040	9.0051	rate
Incidence	Southeast Asia	Pancreatitis	Both	20 to 24	2040	12.6684	rate
DALYs (Disability-Adjusted Life Years)	Global	Pancreatitis	Male	0 to 4	2040	2559.99	number
DALYs (Disability-Adjusted Life Years)	Global	Pancreatitis	Male	5 to 9	2040	4347.96	number
DALYs (Disability-Adjusted Life Years)	Global	Pancreatitis	Male	10 to 14	2040	6070.72	number
DALYs (Disability-Adjusted Life Years)	Global	Pancreatitis	Male	15 to 19	2040	39441	number
DALYs (Disability-Adjusted Life Years)	Global	Pancreatitis	Male	20 to 24	2040	74868.1	number
DALYs (Disability-Adjusted Life Years)	Global	Pancreatitis	Female	0 to 4	2040	1587.57	number
DALYs (Disability-Adjusted Life Years)	Global	Pancreatitis	Female	5 to 9	2040	3620.63	number
DALYs (Disability-Adjusted Life Years)	Global	Pancreatitis	Female	10 to 14	2040	5293.83	number
DALYs (Disability-Adjusted Life Years)	Global	Pancreatitis	Female	15 to 19	2040	19389	number
DALYs (Disability-Adjusted Life Years)	Global	Pancreatitis	Female	20 to 24	2040	27512.5	number
DALYs (Disability-Adjusted Life Years)	Global	Pancreatitis	Both	0 to 4	2040	4147.57	number
DALYs (Disability-Adjusted Life Years)	Global	Pancreatitis	Both	5 to 9	2040	7968.59	number
DALYs (Disability-Adjusted Life Years)	Global	Pancreatitis	Both	10 to 14	2040	11364.6	number
DALYs (Disability-Adjusted Life Years)	Global	Pancreatitis	Both	15 to 19	2040	58830	number
DALYs (Disability-Adjusted Life Years)	Global	Pancreatitis	Both	20 to 24	2040	102381	number
DALYs (Disability-Adjusted Life Years)	Central Europe	Pancreatitis	Male	0 to 4	2040	21.376	number
DALYs (Disability-Adjusted Life Years)	Central Europe	Pancreatitis	Male	5 to 9	2040	34.068	number
DALYs (Disability-Adjusted Life Years)	Central Europe	Pancreatitis	Male	10 to 14	2040	44.9132	number
DALYs (Disability-Adjusted Life Years)	Central Europe	Pancreatitis	Male	15 to 19	2040	268.494	number
DALYs (Disability-Adjusted Life Years)	Central Europe	Pancreatitis	Male	20 to 24	2040	797.312	number
DALYs (Disability-Adjusted Life Years)	Central Europe	Pancreatitis	Female	0 to 4	2040	13.0738	number
DALYs (Disability-Adjusted Life Years)	Central Europe	Pancreatitis	Female	5 to 9	2040	21.3136	number
DALYs (Disability-Adjusted Life Years)	Central Europe	Pancreatitis	Female	10 to 14	2040	27.0301	number
DALYs (Disability-Adjusted Life Years)	Central Europe	Pancreatitis	Female	15 to 19	2040	83.7825	number
DALYs (Disability-Adjusted Life Years)	Central Europe	Pancreatitis	Female	20 to 24	2040	175.191	number
DALYs (Disability-Adjusted Life Years)	Central Europe	Pancreatitis	Both	0 to 4	2040	34.4498	number
DALYs (Disability-Adjusted Life Years)	Central Europe	Pancreatitis	Both	5 to 9	2040	55.3816	number
DALYs (Disability-Adjusted Life Years)	Central Europe	Pancreatitis	Both	10 to 14	2040	71.9433	number
DALYs (Disability-Adjusted Life Years)	Central Europe	Pancreatitis	Both	15 to 19	2040	352.277	number
DALYs (Disability-Adjusted Life Years)	Central Europe	Pancreatitis	Both	20 to 24	2040	972.503	number
DALYs (Disability-Adjusted Life Years)	Central Asia	Pancreatitis	Male	0 to 4	2040	80.1756	number
DALYs (Disability-Adjusted Life Years)	Central Asia	Pancreatitis	Male	5 to 9	2040	101.527	number
DALYs (Disability-Adjusted Life Years)	Central Asia	Pancreatitis	Male	10 to 14	2040	97.9619	number
DALYs (Disability-Adjusted Life Years)	Central Asia	Pancreatitis	Male	15 to 19	2040	514.254	number
DALYs (Disability-Adjusted Life Years)	Central Asia	Pancreatitis	Male	20 to 24	2040	1139.21	number
DALYs (Disability-Adjusted Life Years)	Central Asia	Pancreatitis	Female	0 to 4	2040	120.083	number
DALYs (Disability-Adjusted Life Years)	Central Asia	Pancreatitis	Female	5 to 9	2040	65.3444	number
DALYs (Disability-Adjusted Life Years)	Central Asia	Pancreatitis	Female	10 to 14	2040	62.2532	number
DALYs (Disability-Adjusted Life Years)	Central Asia	Pancreatitis	Female	15 to 19	2040	239.436	number
DALYs (Disability-Adjusted Life Years)	Central Asia	Pancreatitis	Female	20 to 24	2040	438.414	number
DALYs (Disability-Adjusted Life Years)	Central Asia	Pancreatitis	Both	0 to 4	2040	200.259	number
DALYs (Disability-Adjusted Life Years)	Central Asia	Pancreatitis	Both	5 to 9	2040	166.871	number
DALYs (Disability-Adjusted Life Years)	Central Asia	Pancreatitis	Both	10 to 14	2040	160.215	number
DALYs (Disability-Adjusted Life Years)	Central Asia	Pancreatitis	Both	15 to 19	2040	753.69	number
DALYs (Disability-Adjusted Life Years)	Central Asia	Pancreatitis	Both	20 to 24	2040	1577.63	number
DALYs (Disability-Adjusted Life Years)	High-income North America	Pancreatitis	Male	0 to 4	2040	70.5906	number
DALYs (Disability-Adjusted Life Years)	High-income North America	Pancreatitis	Male	5 to 9	2040	195.792	number
DALYs (Disability-Adjusted Life Years)	High-income North America	Pancreatitis	Male	10 to 14	2040	261.781	number
DALYs (Disability-Adjusted Life Years)	High-income North America	Pancreatitis	Male	15 to 19	2040	724.212	number
DALYs (Disability-Adjusted Life Years)	High-income North America	Pancreatitis	Male	20 to 24	2040	1592.71	number
DALYs (Disability-Adjusted Life Years)	High-income North America	Pancreatitis	Female	0 to 4	2040	45.5584	number
DALYs (Disability-Adjusted Life Years)	High-income North America	Pancreatitis	Female	5 to 9	2040	149.152	number
DALYs (Disability-Adjusted Life Years)	High-income North America	Pancreatitis	Female	10 to 14	2040	257.361	number
DALYs (Disability-Adjusted Life Years)	High-income North America	Pancreatitis	Female	15 to 19	2040	419.118	number
DALYs (Disability-Adjusted Life Years)	High-income North America	Pancreatitis	Female	20 to 24	2040	799.265	number
DALYs (Disability-Adjusted Life Years)	High-income North America	Pancreatitis	Both	0 to 4	2040	116.149	number
DALYs (Disability-Adjusted Life Years)	High-income North America	Pancreatitis	Both	5 to 9	2040	344.944	number
DALYs (Disability-Adjusted Life Years)	High-income North America	Pancreatitis	Both	10 to 14	2040	519.142	number
DALYs (Disability-Adjusted Life Years)	High-income North America	Pancreatitis	Both	15 to 19	2040	1143.33	number
DALYs (Disability-Adjusted Life Years)	High-income North America	Pancreatitis	Both	20 to 24	2040	2391.97	number
DALYs (Disability-Adjusted Life Years)	Western Sub-Saharan Africa	Pancreatitis	Male	0 to 4	2040	1200.04	number
DALYs (Disability-Adjusted Life Years)	Western Sub-Saharan Africa	Pancreatitis	Male	5 to 9	2040	552.257	number
DALYs (Disability-Adjusted Life Years)	Western Sub-Saharan Africa	Pancreatitis	Male	10 to 14	2040	542.635	number
DALYs (Disability-Adjusted Life Years)	Western Sub-Saharan Africa	Pancreatitis	Male	15 to 19	2040	10180.1	number
DALYs (Disability-Adjusted Life Years)	Western Sub-Saharan Africa	Pancreatitis	Male	20 to 24	2040	11450.7	number
DALYs (Disability-Adjusted Life Years)	Western Sub-Saharan Africa	Pancreatitis	Female	0 to 4	2040	328.579	number
DALYs (Disability-Adjusted Life Years)	Western Sub-Saharan Africa	Pancreatitis	Female	5 to 9	2040	631.216	number
DALYs (Disability-Adjusted Life Years)	Western Sub-Saharan Africa	Pancreatitis	Female	10 to 14	2040	1207.1	number
DALYs (Disability-Adjusted Life Years)	Western Sub-Saharan Africa	Pancreatitis	Female	15 to 19	2040	1372.5	number
DALYs (Disability-Adjusted Life Years)	Western Sub-Saharan Africa	Pancreatitis	Female	20 to 24	2040	1826.76	number
DALYs (Disability-Adjusted Life Years)	Western Sub-Saharan Africa	Pancreatitis	Both	0 to 4	2040	1528.62	number
DALYs (Disability-Adjusted Life Years)	Western Sub-Saharan Africa	Pancreatitis	Both	5 to 9	2040	1183.47	number
DALYs (Disability-Adjusted Life Years)	Western Sub-Saharan Africa	Pancreatitis	Both	10 to 14	2040	1749.74	number
DALYs (Disability-Adjusted Life Years)	Western Sub-Saharan Africa	Pancreatitis	Both	15 to 19	2040	11552.6	number
DALYs (Disability-Adjusted Life Years)	Western Sub-Saharan Africa	Pancreatitis	Both	20 to 24	2040	13277.5	number
DALYs (Disability-Adjusted Life Years)	Oceania	Pancreatitis	Male	0 to 4	2040	1.07457	number
DALYs (Disability-Adjusted Life Years)	Oceania	Pancreatitis	Male	5 to 9	2040	5.40962	number
DALYs (Disability-Adjusted Life Years)	Oceania	Pancreatitis	Male	10 to 14	2040	10.4283	number
DALYs (Disability-Adjusted Life Years)	Oceania	Pancreatitis	Male	15 to 19	2040	70.2608	number
DALYs (Disability-Adjusted Life Years)	Oceania	Pancreatitis	Male	20 to 24	2040	312.622	number
DALYs (Disability-Adjusted Life Years)	Oceania	Pancreatitis	Female	0 to 4	2040	3.56116	number
DALYs (Disability-Adjusted Life Years)	Oceania	Pancreatitis	Female	5 to 9	2040	131.527	number
DALYs (Disability-Adjusted Life Years)	Oceania	Pancreatitis	Female	10 to 14	2040	8.95465	number
DALYs (Disability-Adjusted Life Years)	Oceania	Pancreatitis	Female	15 to 19	2040	122.833	number
DALYs (Disability-Adjusted Life Years)	Oceania	Pancreatitis	Female	20 to 24	2040	92.5883	number
DALYs (Disability-Adjusted Life Years)	Oceania	Pancreatitis	Both	0 to 4	2040	4.63573	number
DALYs (Disability-Adjusted Life Years)	Oceania	Pancreatitis	Both	5 to 9	2040	136.936	number
DALYs (Disability-Adjusted Life Years)	Oceania	Pancreatitis	Both	10 to 14	2040	19.3829	number
DALYs (Disability-Adjusted Life Years)	Oceania	Pancreatitis	Both	15 to 19	2040	193.094	number
DALYs (Disability-Adjusted Life Years)	Oceania	Pancreatitis	Both	20 to 24	2040	405.21	number
DALYs (Disability-Adjusted Life Years)	East Asia	Pancreatitis	Male	0 to 4	2040	142.141	number
DALYs (Disability-Adjusted Life Years)	East Asia	Pancreatitis	Male	5 to 9	2040	221.833	number
DALYs (Disability-Adjusted Life Years)	East Asia	Pancreatitis	Male	10 to 14	2040	289.019	number
DALYs (Disability-Adjusted Life Years)	East Asia	Pancreatitis	Male	15 to 19	2040	1063.66	number
DALYs (Disability-Adjusted Life Years)	East Asia	Pancreatitis	Male	20 to 24	2040	2460.79	number
DALYs (Disability-Adjusted Life Years)	East Asia	Pancreatitis	Female	0 to 4	2040	100.209	number
DALYs (Disability-Adjusted Life Years)	East Asia	Pancreatitis	Female	5 to 9	2040	100.076	number
DALYs (Disability-Adjusted Life Years)	East Asia	Pancreatitis	Female	10 to 14	2040	214.125	number
DALYs (Disability-Adjusted Life Years)	East Asia	Pancreatitis	Female	15 to 19	2040	537.268	number
DALYs (Disability-Adjusted Life Years)	East Asia	Pancreatitis	Female	20 to 24	2040	865.526	number
DALYs (Disability-Adjusted Life Years)	East Asia	Pancreatitis	Both	0 to 4	2040	242.35	number
DALYs (Disability-Adjusted Life Years)	East Asia	Pancreatitis	Both	5 to 9	2040	321.909	number
DALYs (Disability-Adjusted Life Years)	East Asia	Pancreatitis	Both	10 to 14	2040	503.144	number
DALYs (Disability-Adjusted Life Years)	East Asia	Pancreatitis	Both	15 to 19	2040	1600.92	number
DALYs (Disability-Adjusted Life Years)	East Asia	Pancreatitis	Both	20 to 24	2040	3326.31	number
DALYs (Disability-Adjusted Life Years)	North Africa and Middle East	Pancreatitis	Male	0 to 4	2040	405.308	number
DALYs (Disability-Adjusted Life Years)	North Africa and Middle East	Pancreatitis	Male	5 to 9	2040	387.191	number
DALYs (Disability-Adjusted Life Years)	North Africa and Middle East	Pancreatitis	Male	10 to 14	2040	742.94	number
DALYs (Disability-Adjusted Life Years)	North Africa and Middle East	Pancreatitis	Male	15 to 19	2040	1073.67	number
DALYs (Disability-Adjusted Life Years)	North Africa and Middle East	Pancreatitis	Male	20 to 24	2040	1393.43	number
DALYs (Disability-Adjusted Life Years)	North Africa and Middle East	Pancreatitis	Female	0 to 4	2040	420.791	number
DALYs (Disability-Adjusted Life Years)	North Africa and Middle East	Pancreatitis	Female	5 to 9	2040	565.519	number
DALYs (Disability-Adjusted Life Years)	North Africa and Middle East	Pancreatitis	Female	10 to 14	2040	489.896	number
DALYs (Disability-Adjusted Life Years)	North Africa and Middle East	Pancreatitis	Female	15 to 19	2040	789.346	number
DALYs (Disability-Adjusted Life Years)	North Africa and Middle East	Pancreatitis	Female	20 to 24	2040	1140.32	number
DALYs (Disability-Adjusted Life Years)	North Africa and Middle East	Pancreatitis	Both	0 to 4	2040	826.099	number
DALYs (Disability-Adjusted Life Years)	North Africa and Middle East	Pancreatitis	Both	5 to 9	2040	952.71	number
DALYs (Disability-Adjusted Life Years)	North Africa and Middle East	Pancreatitis	Both	10 to 14	2040	1232.84	number
DALYs (Disability-Adjusted Life Years)	North Africa and Middle East	Pancreatitis	Both	15 to 19	2040	1863.01	number
DALYs (Disability-Adjusted Life Years)	North Africa and Middle East	Pancreatitis	Both	20 to 24	2040	2533.75	number
DALYs (Disability-Adjusted Life Years)	Western Europe	Pancreatitis	Male	0 to 4	2040	27.6115	number
DALYs (Disability-Adjusted Life Years)	Western Europe	Pancreatitis	Male	5 to 9	2040	59.4546	number
DALYs (Disability-Adjusted Life Years)	Western Europe	Pancreatitis	Male	10 to 14	2040	85.3203	number
DALYs (Disability-Adjusted Life Years)	Western Europe	Pancreatitis	Male	15 to 19	2040	274.011	number
DALYs (Disability-Adjusted Life Years)	Western Europe	Pancreatitis	Male	20 to 24	2040	610.416	number
DALYs (Disability-Adjusted Life Years)	Western Europe	Pancreatitis	Female	0 to 4	2040	32.853	number
DALYs (Disability-Adjusted Life Years)	Western Europe	Pancreatitis	Female	5 to 9	2040	54.9627	number
DALYs (Disability-Adjusted Life Years)	Western Europe	Pancreatitis	Female	10 to 14	2040	88.0309	number
DALYs (Disability-Adjusted Life Years)	Western Europe	Pancreatitis	Female	15 to 19	2040	185.436	number
DALYs (Disability-Adjusted Life Years)	Western Europe	Pancreatitis	Female	20 to 24	2040	339.005	number
DALYs (Disability-Adjusted Life Years)	Western Europe	Pancreatitis	Both	0 to 4	2040	60.4645	number
DALYs (Disability-Adjusted Life Years)	Western Europe	Pancreatitis	Both	5 to 9	2040	114.417	number
DALYs (Disability-Adjusted Life Years)	Western Europe	Pancreatitis	Both	10 to 14	2040	173.351	number
DALYs (Disability-Adjusted Life Years)	Western Europe	Pancreatitis	Both	15 to 19	2040	459.448	number
DALYs (Disability-Adjusted Life Years)	Western Europe	Pancreatitis	Both	20 to 24	2040	949.422	number
DALYs (Disability-Adjusted Life Years)	Southern Latin America	Pancreatitis	Male	0 to 4	2040	9.76658	number
DALYs (Disability-Adjusted Life Years)	Southern Latin America	Pancreatitis	Male	5 to 9	2040	59.0432	number
DALYs (Disability-Adjusted Life Years)	Southern Latin America	Pancreatitis	Male	10 to 14	2040	60.8306	number
DALYs (Disability-Adjusted Life Years)	Southern Latin America	Pancreatitis	Male	15 to 19	2040	229.913	number
DALYs (Disability-Adjusted Life Years)	Southern Latin America	Pancreatitis	Male	20 to 24	2040	399.366	number
DALYs (Disability-Adjusted Life Years)	Southern Latin America	Pancreatitis	Female	0 to 4	2040	13.8423	number
DALYs (Disability-Adjusted Life Years)	Southern Latin America	Pancreatitis	Female	5 to 9	2040	51.565	number
DALYs (Disability-Adjusted Life Years)	Southern Latin America	Pancreatitis	Female	10 to 14	2040	109.241	number
DALYs (Disability-Adjusted Life Years)	Southern Latin America	Pancreatitis	Female	15 to 19	2040	333.822	number
DALYs (Disability-Adjusted Life Years)	Southern Latin America	Pancreatitis	Female	20 to 24	2040	442.101	number
DALYs (Disability-Adjusted Life Years)	Southern Latin America	Pancreatitis	Both	0 to 4	2040	23.6088	number
DALYs (Disability-Adjusted Life Years)	Southern Latin America	Pancreatitis	Both	5 to 9	2040	110.608	number
DALYs (Disability-Adjusted Life Years)	Southern Latin America	Pancreatitis	Both	10 to 14	2040	170.071	number
DALYs (Disability-Adjusted Life Years)	Southern Latin America	Pancreatitis	Both	15 to 19	2040	563.735	number
DALYs (Disability-Adjusted Life Years)	Southern Latin America	Pancreatitis	Both	20 to 24	2040	841.467	number
DALYs (Disability-Adjusted Life Years)	Andean Latin America	Pancreatitis	Male	0 to 4	2040	90.166	number
DALYs (Disability-Adjusted Life Years)	Andean Latin America	Pancreatitis	Male	5 to 9	2040	194.197	number
DALYs (Disability-Adjusted Life Years)	Andean Latin America	Pancreatitis	Male	10 to 14	2040	170.303	number
DALYs (Disability-Adjusted Life Years)	Andean Latin America	Pancreatitis	Male	15 to 19	2040	778.082	number
DALYs (Disability-Adjusted Life Years)	Andean Latin America	Pancreatitis	Male	20 to 24	2040	1100.11	number
DALYs (Disability-Adjusted Life Years)	Andean Latin America	Pancreatitis	Female	0 to 4	2040	46.9914	number
DALYs (Disability-Adjusted Life Years)	Andean Latin America	Pancreatitis	Female	5 to 9	2040	208.043	number
DALYs (Disability-Adjusted Life Years)	Andean Latin America	Pancreatitis	Female	10 to 14	2040	177.625	number
DALYs (Disability-Adjusted Life Years)	Andean Latin America	Pancreatitis	Female	15 to 19	2040	636.642	number
DALYs (Disability-Adjusted Life Years)	Andean Latin America	Pancreatitis	Female	20 to 24	2040	648.158	number
DALYs (Disability-Adjusted Life Years)	Andean Latin America	Pancreatitis	Both	0 to 4	2040	137.157	number
DALYs (Disability-Adjusted Life Years)	Andean Latin America	Pancreatitis	Both	5 to 9	2040	402.239	number
DALYs (Disability-Adjusted Life Years)	Andean Latin America	Pancreatitis	Both	10 to 14	2040	347.928	number
DALYs (Disability-Adjusted Life Years)	Andean Latin America	Pancreatitis	Both	15 to 19	2040	1414.72	number
DALYs (Disability-Adjusted Life Years)	Andean Latin America	Pancreatitis	Both	20 to 24	2040	1748.26	number
DALYs (Disability-Adjusted Life Years)	Eastern Sub-Saharan Africa	Pancreatitis	Male	0 to 4	2040	433.846	number
DALYs (Disability-Adjusted Life Years)	Eastern Sub-Saharan Africa	Pancreatitis	Male	5 to 9	2040	589.866	number
DALYs (Disability-Adjusted Life Years)	Eastern Sub-Saharan Africa	Pancreatitis	Male	10 to 14	2040	840.592	number
DALYs (Disability-Adjusted Life Years)	Eastern Sub-Saharan Africa	Pancreatitis	Male	15 to 19	2040	3416.37	number
DALYs (Disability-Adjusted Life Years)	Eastern Sub-Saharan Africa	Pancreatitis	Male	20 to 24	2040	7672.81	number
DALYs (Disability-Adjusted Life Years)	Eastern Sub-Saharan Africa	Pancreatitis	Female	0 to 4	2040	140.073	number
DALYs (Disability-Adjusted Life Years)	Eastern Sub-Saharan Africa	Pancreatitis	Female	5 to 9	2040	300.611	number
DALYs (Disability-Adjusted Life Years)	Eastern Sub-Saharan Africa	Pancreatitis	Female	10 to 14	2040	425.423	number
DALYs (Disability-Adjusted Life Years)	Eastern Sub-Saharan Africa	Pancreatitis	Female	15 to 19	2040	1001.1	number
DALYs (Disability-Adjusted Life Years)	Eastern Sub-Saharan Africa	Pancreatitis	Female	20 to 24	2040	1310.15	number
DALYs (Disability-Adjusted Life Years)	Eastern Sub-Saharan Africa	Pancreatitis	Both	0 to 4	2040	573.92	number
DALYs (Disability-Adjusted Life Years)	Eastern Sub-Saharan Africa	Pancreatitis	Both	5 to 9	2040	890.477	number
DALYs (Disability-Adjusted Life Years)	Eastern Sub-Saharan Africa	Pancreatitis	Both	10 to 14	2040	1266.01	number
DALYs (Disability-Adjusted Life Years)	Eastern Sub-Saharan Africa	Pancreatitis	Both	15 to 19	2040	4417.48	number
DALYs (Disability-Adjusted Life Years)	Eastern Sub-Saharan Africa	Pancreatitis	Both	20 to 24	2040	8982.96	number
DALYs (Disability-Adjusted Life Years)	Central Sub-Saharan Africa	Pancreatitis	Male	0 to 4	2040	54.5446	number
DALYs (Disability-Adjusted Life Years)	Central Sub-Saharan Africa	Pancreatitis	Male	5 to 9	2040	121.94	number
DALYs (Disability-Adjusted Life Years)	Central Sub-Saharan Africa	Pancreatitis	Male	10 to 14	2040	209.193	number
DALYs (Disability-Adjusted Life Years)	Central Sub-Saharan Africa	Pancreatitis	Male	15 to 19	2040	1285.71	number
DALYs (Disability-Adjusted Life Years)	Central Sub-Saharan Africa	Pancreatitis	Male	20 to 24	2040	2906.83	number
DALYs (Disability-Adjusted Life Years)	Central Sub-Saharan Africa	Pancreatitis	Female	0 to 4	2040	37.7645	number
DALYs (Disability-Adjusted Life Years)	Central Sub-Saharan Africa	Pancreatitis	Female	5 to 9	2040	75.6187	number
DALYs (Disability-Adjusted Life Years)	Central Sub-Saharan Africa	Pancreatitis	Female	10 to 14	2040	105.441	number
DALYs (Disability-Adjusted Life Years)	Central Sub-Saharan Africa	Pancreatitis	Female	15 to 19	2040	278.197	number
DALYs (Disability-Adjusted Life Years)	Central Sub-Saharan Africa	Pancreatitis	Female	20 to 24	2040	418.501	number
DALYs (Disability-Adjusted Life Years)	Central Sub-Saharan Africa	Pancreatitis	Both	0 to 4	2040	92.309	number
DALYs (Disability-Adjusted Life Years)	Central Sub-Saharan Africa	Pancreatitis	Both	5 to 9	2040	197.558	number
DALYs (Disability-Adjusted Life Years)	Central Sub-Saharan Africa	Pancreatitis	Both	10 to 14	2040	314.635	number
DALYs (Disability-Adjusted Life Years)	Central Sub-Saharan Africa	Pancreatitis	Both	15 to 19	2040	1563.9	number
DALYs (Disability-Adjusted Life Years)	Central Sub-Saharan Africa	Pancreatitis	Both	20 to 24	2040	3325.33	number
DALYs (Disability-Adjusted Life Years)	Eastern Europe	Pancreatitis	Male	0 to 4	2040	29.9412	number
DALYs (Disability-Adjusted Life Years)	Eastern Europe	Pancreatitis	Male	5 to 9	2040	90.0065	number
DALYs (Disability-Adjusted Life Years)	Eastern Europe	Pancreatitis	Male	10 to 14	2040	183.45	number
DALYs (Disability-Adjusted Life Years)	Eastern Europe	Pancreatitis	Male	15 to 19	2040	971.517	number
DALYs (Disability-Adjusted Life Years)	Eastern Europe	Pancreatitis	Male	20 to 24	2040	4206.11	number
DALYs (Disability-Adjusted Life Years)	Eastern Europe	Pancreatitis	Female	0 to 4	2040	51.6363	number
DALYs (Disability-Adjusted Life Years)	Eastern Europe	Pancreatitis	Female	5 to 9	2040	120.35	number
DALYs (Disability-Adjusted Life Years)	Eastern Europe	Pancreatitis	Female	10 to 14	2040	195.15	number
DALYs (Disability-Adjusted Life Years)	Eastern Europe	Pancreatitis	Female	15 to 19	2040	647.624	number
DALYs (Disability-Adjusted Life Years)	Eastern Europe	Pancreatitis	Female	20 to 24	2040	1708.28	number
DALYs (Disability-Adjusted Life Years)	Eastern Europe	Pancreatitis	Both	0 to 4	2040	81.5775	number
DALYs (Disability-Adjusted Life Years)	Eastern Europe	Pancreatitis	Both	5 to 9	2040	210.356	number
DALYs (Disability-Adjusted Life Years)	Eastern Europe	Pancreatitis	Both	10 to 14	2040	378.6	number
DALYs (Disability-Adjusted Life Years)	Eastern Europe	Pancreatitis	Both	15 to 19	2040	1619.14	number
DALYs (Disability-Adjusted Life Years)	Eastern Europe	Pancreatitis	Both	20 to 24	2040	5914.39	number
DALYs (Disability-Adjusted Life Years)	South Asia	Pancreatitis	Male	0 to 4	2040	925.597	number
DALYs (Disability-Adjusted Life Years)	South Asia	Pancreatitis	Male	5 to 9	2040	955.374	number
DALYs (Disability-Adjusted Life Years)	South Asia	Pancreatitis	Male	10 to 14	2040	1228.76	number
DALYs (Disability-Adjusted Life Years)	South Asia	Pancreatitis	Male	15 to 19	2040	13989.1	number
DALYs (Disability-Adjusted Life Years)	South Asia	Pancreatitis	Male	20 to 24	2040	24134.3	number
DALYs (Disability-Adjusted Life Years)	South Asia	Pancreatitis	Female	0 to 4	2040	612.27	number
DALYs (Disability-Adjusted Life Years)	South Asia	Pancreatitis	Female	5 to 9	2040	716.481	number
DALYs (Disability-Adjusted Life Years)	South Asia	Pancreatitis	Female	10 to 14	2040	1159.72	number
DALYs (Disability-Adjusted Life Years)	South Asia	Pancreatitis	Female	15 to 19	2040	7952.24	number
DALYs (Disability-Adjusted Life Years)	South Asia	Pancreatitis	Female	20 to 24	2040	10076.9	number
DALYs (Disability-Adjusted Life Years)	South Asia	Pancreatitis	Both	0 to 4	2040	1537.87	number
DALYs (Disability-Adjusted Life Years)	South Asia	Pancreatitis	Both	5 to 9	2040	1671.86	number
DALYs (Disability-Adjusted Life Years)	South Asia	Pancreatitis	Both	10 to 14	2040	2388.48	number
DALYs (Disability-Adjusted Life Years)	South Asia	Pancreatitis	Both	15 to 19	2040	21941.3	number
DALYs (Disability-Adjusted Life Years)	South Asia	Pancreatitis	Both	20 to 24	2040	34211.2	number
DALYs (Disability-Adjusted Life Years)	Australasia	Pancreatitis	Male	0 to 4	2040	1.79943	number
DALYs (Disability-Adjusted Life Years)	Australasia	Pancreatitis	Male	5 to 9	2040	3.25703	number
DALYs (Disability-Adjusted Life Years)	Australasia	Pancreatitis	Male	10 to 14	2040	5.0272	number
DALYs (Disability-Adjusted Life Years)	Australasia	Pancreatitis	Male	15 to 19	2040	19.0825	number
DALYs (Disability-Adjusted Life Years)	Australasia	Pancreatitis	Male	20 to 24	2040	34.8695	number
DALYs (Disability-Adjusted Life Years)	Australasia	Pancreatitis	Female	0 to 4	2040	2.18735	number
DALYs (Disability-Adjusted Life Years)	Australasia	Pancreatitis	Female	5 to 9	2040	10.0968	number
DALYs (Disability-Adjusted Life Years)	Australasia	Pancreatitis	Female	10 to 14	2040	7.23768	number
DALYs (Disability-Adjusted Life Years)	Australasia	Pancreatitis	Female	15 to 19	2040	12.9988	number
DALYs (Disability-Adjusted Life Years)	Australasia	Pancreatitis	Female	20 to 24	2040	28.2177	number
DALYs (Disability-Adjusted Life Years)	Australasia	Pancreatitis	Both	0 to 4	2040	3.98678	number
DALYs (Disability-Adjusted Life Years)	Australasia	Pancreatitis	Both	5 to 9	2040	13.3538	number
DALYs (Disability-Adjusted Life Years)	Australasia	Pancreatitis	Both	10 to 14	2040	12.2649	number
DALYs (Disability-Adjusted Life Years)	Australasia	Pancreatitis	Both	15 to 19	2040	32.0813	number
DALYs (Disability-Adjusted Life Years)	Australasia	Pancreatitis	Both	20 to 24	2040	63.0872	number
DALYs (Disability-Adjusted Life Years)	High-income Asia Pacific	Pancreatitis	Male	0 to 4	2040	30.1569	number
DALYs (Disability-Adjusted Life Years)	High-income Asia Pacific	Pancreatitis	Male	5 to 9	2040	65.3145	number
DALYs (Disability-Adjusted Life Years)	High-income Asia Pacific	Pancreatitis	Male	10 to 14	2040	92.7481	number
DALYs (Disability-Adjusted Life Years)	High-income Asia Pacific	Pancreatitis	Male	15 to 19	2040	153.37	number
DALYs (Disability-Adjusted Life Years)	High-income Asia Pacific	Pancreatitis	Male	20 to 24	2040	232.968	number
DALYs (Disability-Adjusted Life Years)	High-income Asia Pacific	Pancreatitis	Female	0 to 4	2040	31.6331	number
DALYs (Disability-Adjusted Life Years)	High-income Asia Pacific	Pancreatitis	Female	5 to 9	2040	90.1485	number
DALYs (Disability-Adjusted Life Years)	High-income Asia Pacific	Pancreatitis	Female	10 to 14	2040	89.0838	number
DALYs (Disability-Adjusted Life Years)	High-income Asia Pacific	Pancreatitis	Female	15 to 19	2040	95.5722	number
DALYs (Disability-Adjusted Life Years)	High-income Asia Pacific	Pancreatitis	Female	20 to 24	2040	120.173	number
DALYs (Disability-Adjusted Life Years)	High-income Asia Pacific	Pancreatitis	Both	0 to 4	2040	61.79	number
DALYs (Disability-Adjusted Life Years)	High-income Asia Pacific	Pancreatitis	Both	5 to 9	2040	155.463	number
DALYs (Disability-Adjusted Life Years)	High-income Asia Pacific	Pancreatitis	Both	10 to 14	2040	181.832	number
DALYs (Disability-Adjusted Life Years)	High-income Asia Pacific	Pancreatitis	Both	15 to 19	2040	248.942	number
DALYs (Disability-Adjusted Life Years)	High-income Asia Pacific	Pancreatitis	Both	20 to 24	2040	353.141	number
DALYs (Disability-Adjusted Life Years)	Central Latin America	Pancreatitis	Male	0 to 4	2040	112.243	number
DALYs (Disability-Adjusted Life Years)	Central Latin America	Pancreatitis	Male	5 to 9	2040	394.27	number
DALYs (Disability-Adjusted Life Years)	Central Latin America	Pancreatitis	Male	10 to 14	2040	526.242	number
DALYs (Disability-Adjusted Life Years)	Central Latin America	Pancreatitis	Male	15 to 19	2040	1939.39	number
DALYs (Disability-Adjusted Life Years)	Central Latin America	Pancreatitis	Male	20 to 24	2040	4595.44	number
DALYs (Disability-Adjusted Life Years)	Central Latin America	Pancreatitis	Female	0 to 4	2040	142.61	number
DALYs (Disability-Adjusted Life Years)	Central Latin America	Pancreatitis	Female	5 to 9	2040	445.827	number
DALYs (Disability-Adjusted Life Years)	Central Latin America	Pancreatitis	Female	10 to 14	2040	642.991	number
DALYs (Disability-Adjusted Life Years)	Central Latin America	Pancreatitis	Female	15 to 19	2040	1750.84	number
DALYs (Disability-Adjusted Life Years)	Central Latin America	Pancreatitis	Female	20 to 24	2040	2702.76	number
DALYs (Disability-Adjusted Life Years)	Central Latin America	Pancreatitis	Both	0 to 4	2040	254.853	number
DALYs (Disability-Adjusted Life Years)	Central Latin America	Pancreatitis	Both	5 to 9	2040	840.097	number
DALYs (Disability-Adjusted Life Years)	Central Latin America	Pancreatitis	Both	10 to 14	2040	1169.23	number
DALYs (Disability-Adjusted Life Years)	Central Latin America	Pancreatitis	Both	15 to 19	2040	3690.23	number
DALYs (Disability-Adjusted Life Years)	Central Latin America	Pancreatitis	Both	20 to 24	2040	7298.2	number
DALYs (Disability-Adjusted Life Years)	Caribbean	Pancreatitis	Male	0 to 4	2040	35.1971	number
DALYs (Disability-Adjusted Life Years)	Caribbean	Pancreatitis	Male	5 to 9	2040	10.372	number
DALYs (Disability-Adjusted Life Years)	Caribbean	Pancreatitis	Male	10 to 14	2040	56.6016	number
DALYs (Disability-Adjusted Life Years)	Caribbean	Pancreatitis	Male	15 to 19	2040	156.113	number
DALYs (Disability-Adjusted Life Years)	Caribbean	Pancreatitis	Male	20 to 24	2040	287.636	number
DALYs (Disability-Adjusted Life Years)	Caribbean	Pancreatitis	Female	0 to 4	2040	40.5161	number
DALYs (Disability-Adjusted Life Years)	Caribbean	Pancreatitis	Female	5 to 9	2040	36.8365	number
DALYs (Disability-Adjusted Life Years)	Caribbean	Pancreatitis	Female	10 to 14	2040	49.2451	number
DALYs (Disability-Adjusted Life Years)	Caribbean	Pancreatitis	Female	15 to 19	2040	154.942	number
DALYs (Disability-Adjusted Life Years)	Caribbean	Pancreatitis	Female	20 to 24	2040	364.503	number
DALYs (Disability-Adjusted Life Years)	Caribbean	Pancreatitis	Both	0 to 4	2040	75.7132	number
DALYs (Disability-Adjusted Life Years)	Caribbean	Pancreatitis	Both	5 to 9	2040	47.2084	number
DALYs (Disability-Adjusted Life Years)	Caribbean	Pancreatitis	Both	10 to 14	2040	105.847	number
DALYs (Disability-Adjusted Life Years)	Caribbean	Pancreatitis	Both	15 to 19	2040	311.055	number
DALYs (Disability-Adjusted Life Years)	Caribbean	Pancreatitis	Both	20 to 24	2040	652.139	number
DALYs (Disability-Adjusted Life Years)	Southern Sub-Saharan Africa	Pancreatitis	Male	0 to 4	2040	9.46032	number
DALYs (Disability-Adjusted Life Years)	Southern Sub-Saharan Africa	Pancreatitis	Male	5 to 9	2040	35.7282	number
DALYs (Disability-Adjusted Life Years)	Southern Sub-Saharan Africa	Pancreatitis	Male	10 to 14	2040	68.0247	number
DALYs (Disability-Adjusted Life Years)	Southern Sub-Saharan Africa	Pancreatitis	Male	15 to 19	2040	470.228	number
DALYs (Disability-Adjusted Life Years)	Southern Sub-Saharan Africa	Pancreatitis	Male	20 to 24	2040	1259.41	number
DALYs (Disability-Adjusted Life Years)	Southern Sub-Saharan Africa	Pancreatitis	Female	0 to 4	2040	4.41146	number
DALYs (Disability-Adjusted Life Years)	Southern Sub-Saharan Africa	Pancreatitis	Female	5 to 9	2040	15.1964	number
DALYs (Disability-Adjusted Life Years)	Southern Sub-Saharan Africa	Pancreatitis	Female	10 to 14	2040	29.4428	number
DALYs (Disability-Adjusted Life Years)	Southern Sub-Saharan Africa	Pancreatitis	Female	15 to 19	2040	54.7457	number
DALYs (Disability-Adjusted Life Years)	Southern Sub-Saharan Africa	Pancreatitis	Female	20 to 24	2040	175.519	number
DALYs (Disability-Adjusted Life Years)	Southern Sub-Saharan Africa	Pancreatitis	Both	0 to 4	2040	13.8718	number
DALYs (Disability-Adjusted Life Years)	Southern Sub-Saharan Africa	Pancreatitis	Both	5 to 9	2040	50.9246	number
DALYs (Disability-Adjusted Life Years)	Southern Sub-Saharan Africa	Pancreatitis	Both	10 to 14	2040	97.4676	number
DALYs (Disability-Adjusted Life Years)	Southern Sub-Saharan Africa	Pancreatitis	Both	15 to 19	2040	524.974	number
DALYs (Disability-Adjusted Life Years)	Southern Sub-Saharan Africa	Pancreatitis	Both	20 to 24	2040	1434.93	number
DALYs (Disability-Adjusted Life Years)	Tropical Latin America	Pancreatitis	Male	0 to 4	2040	17.9257	number
DALYs (Disability-Adjusted Life Years)	Tropical Latin America	Pancreatitis	Male	5 to 9	2040	55.2861	number
DALYs (Disability-Adjusted Life Years)	Tropical Latin America	Pancreatitis	Male	10 to 14	2040	67.8906	number
DALYs (Disability-Adjusted Life Years)	Tropical Latin America	Pancreatitis	Male	15 to 19	2040	567.429	number
DALYs (Disability-Adjusted Life Years)	Tropical Latin America	Pancreatitis	Male	20 to 24	2040	1377.08	number
DALYs (Disability-Adjusted Life Years)	Tropical Latin America	Pancreatitis	Female	0 to 4	2040	29.194	number
DALYs (Disability-Adjusted Life Years)	Tropical Latin America	Pancreatitis	Female	5 to 9	2040	123.071	number
DALYs (Disability-Adjusted Life Years)	Tropical Latin America	Pancreatitis	Female	10 to 14	2040	184.583	number
DALYs (Disability-Adjusted Life Years)	Tropical Latin America	Pancreatitis	Female	15 to 19	2040	627.689	number
DALYs (Disability-Adjusted Life Years)	Tropical Latin America	Pancreatitis	Female	20 to 24	2040	1173.36	number
DALYs (Disability-Adjusted Life Years)	Tropical Latin America	Pancreatitis	Both	0 to 4	2040	47.1197	number
DALYs (Disability-Adjusted Life Years)	Tropical Latin America	Pancreatitis	Both	5 to 9	2040	178.357	number
DALYs (Disability-Adjusted Life Years)	Tropical Latin America	Pancreatitis	Both	10 to 14	2040	252.474	number
DALYs (Disability-Adjusted Life Years)	Tropical Latin America	Pancreatitis	Both	15 to 19	2040	1195.12	number
DALYs (Disability-Adjusted Life Years)	Tropical Latin America	Pancreatitis	Both	20 to 24	2040	2550.44	number
DALYs (Disability-Adjusted Life Years)	Southeast Asia	Pancreatitis	Male	0 to 4	2040	135.99	number
DALYs (Disability-Adjusted Life Years)	Southeast Asia	Pancreatitis	Male	5 to 9	2040	266.133	number
DALYs (Disability-Adjusted Life Years)	Southeast Asia	Pancreatitis	Male	10 to 14	2040	535.631	number
DALYs (Disability-Adjusted Life Years)	Southeast Asia	Pancreatitis	Male	15 to 19	2040	2936.41	number
DALYs (Disability-Adjusted Life Years)	Southeast Asia	Pancreatitis	Male	20 to 24	2040	6659.86	number
DALYs (Disability-Adjusted Life Years)	Southeast Asia	Pancreatitis	Female	0 to 4	2040	48.7716	number
DALYs (Disability-Adjusted Life Years)	Southeast Asia	Pancreatitis	Female	5 to 9	2040	207.72	number
DALYs (Disability-Adjusted Life Years)	Southeast Asia	Pancreatitis	Female	10 to 14	2040	290.924	number
DALYs (Disability-Adjusted Life Years)	Southeast Asia	Pancreatitis	Female	15 to 19	2040	697.883	number
DALYs (Disability-Adjusted Life Years)	Southeast Asia	Pancreatitis	Female	20 to 24	2040	1541.77	number
DALYs (Disability-Adjusted Life Years)	Southeast Asia	Pancreatitis	Both	0 to 4	2040	184.762	number
DALYs (Disability-Adjusted Life Years)	Southeast Asia	Pancreatitis	Both	5 to 9	2040	473.853	number
DALYs (Disability-Adjusted Life Years)	Southeast Asia	Pancreatitis	Both	10 to 14	2040	826.555	number
DALYs (Disability-Adjusted Life Years)	Southeast Asia	Pancreatitis	Both	15 to 19	2040	3634.29	number
DALYs (Disability-Adjusted Life Years)	Southeast Asia	Pancreatitis	Both	20 to 24	2040	8201.63	number
Incidence	Global	Pancreatitis	Male	0 to 4	2040	6559.29	number
Incidence	Global	Pancreatitis	Male	5 to 9	2040	16917.6	number
Incidence	Global	Pancreatitis	Male	10 to 14	2040	27541	number
Incidence	Global	Pancreatitis	Male	15 to 19	2040	43060.7	number
Incidence	Global	Pancreatitis	Male	20 to 24	2040	65261.3	number
Incidence	Global	Pancreatitis	Female	0 to 4	2040	7167.84	number
Incidence	Global	Pancreatitis	Female	5 to 9	2040	18386.4	number
Incidence	Global	Pancreatitis	Female	10 to 14	2040	29154.8	number
Incidence	Global	Pancreatitis	Female	15 to 19	2040	43167.6	number
Incidence	Global	Pancreatitis	Female	20 to 24	2040	56350	number
Incidence	Global	Pancreatitis	Both	0 to 4	2040	13727.1	number
Incidence	Global	Pancreatitis	Both	5 to 9	2040	35304	number
Incidence	Global	Pancreatitis	Both	10 to 14	2040	56695.8	number
Incidence	Global	Pancreatitis	Both	15 to 19	2040	86228.3	number
Incidence	Global	Pancreatitis	Both	20 to 24	2040	121611	number
Incidence	Central Europe	Pancreatitis	Male	0 to 4	2040	51.0479	number
Incidence	Central Europe	Pancreatitis	Male	5 to 9	2040	95.9313	number
Incidence	Central Europe	Pancreatitis	Male	10 to 14	2040	132.728	number
Incidence	Central Europe	Pancreatitis	Male	15 to 19	2040	250.488	number
Incidence	Central Europe	Pancreatitis	Male	20 to 24	2040	550.395	number
Incidence	Central Europe	Pancreatitis	Female	0 to 4	2040	55.0221	number
Incidence	Central Europe	Pancreatitis	Female	5 to 9	2040	106.922	number
Incidence	Central Europe	Pancreatitis	Female	10 to 14	2040	139.468	number
Incidence	Central Europe	Pancreatitis	Female	15 to 19	2040	228.374	number
Incidence	Central Europe	Pancreatitis	Female	20 to 24	2040	375.171	number
Incidence	Central Europe	Pancreatitis	Both	0 to 4	2040	106.07	number
Incidence	Central Europe	Pancreatitis	Both	5 to 9	2040	202.853	number
Incidence	Central Europe	Pancreatitis	Both	10 to 14	2040	272.196	number
Incidence	Central Europe	Pancreatitis	Both	15 to 19	2040	478.862	number
Incidence	Central Europe	Pancreatitis	Both	20 to 24	2040	925.566	number
Incidence	Central Asia	Pancreatitis	Male	0 to 4	2040	210.998	number
Incidence	Central Asia	Pancreatitis	Male	5 to 9	2040	363.59	number
Incidence	Central Asia	Pancreatitis	Male	10 to 14	2040	454.792	number
Incidence	Central Asia	Pancreatitis	Male	15 to 19	2040	723.624	number
Incidence	Central Asia	Pancreatitis	Male	20 to 24	2040	1281.7	number
Incidence	Central Asia	Pancreatitis	Female	0 to 4	2040	166.277	number
Incidence	Central Asia	Pancreatitis	Female	5 to 9	2040	322.897	number
Incidence	Central Asia	Pancreatitis	Female	10 to 14	2040	405.637	number
Incidence	Central Asia	Pancreatitis	Female	15 to 19	2040	588.441	number
Incidence	Central Asia	Pancreatitis	Female	20 to 24	2040	894.699	number
Incidence	Central Asia	Pancreatitis	Both	0 to 4	2040	377.274	number
Incidence	Central Asia	Pancreatitis	Both	5 to 9	2040	686.487	number
Incidence	Central Asia	Pancreatitis	Both	10 to 14	2040	860.429	number
Incidence	Central Asia	Pancreatitis	Both	15 to 19	2040	1312.06	number
Incidence	Central Asia	Pancreatitis	Both	20 to 24	2040	2176.4	number
Incidence	High-income North America	Pancreatitis	Male	0 to 4	2040	203.991	number
Incidence	High-income North America	Pancreatitis	Male	5 to 9	2040	520.074	number
Incidence	High-income North America	Pancreatitis	Male	10 to 14	2040	881.823	number
Incidence	High-income North America	Pancreatitis	Male	15 to 19	2040	1736.26	number
Incidence	High-income North America	Pancreatitis	Male	20 to 24	2040	3002.04	number
Incidence	High-income North America	Pancreatitis	Female	0 to 4	2040	205.94	number
Incidence	High-income North America	Pancreatitis	Female	5 to 9	2040	539.633	number
Incidence	High-income North America	Pancreatitis	Female	10 to 14	2040	1063.24	number
Incidence	High-income North America	Pancreatitis	Female	15 to 19	2040	2425.03	number
Incidence	High-income North America	Pancreatitis	Female	20 to 24	2040	4142.55	number
Incidence	High-income North America	Pancreatitis	Both	0 to 4	2040	409.931	number
Incidence	High-income North America	Pancreatitis	Both	5 to 9	2040	1059.71	number
Incidence	High-income North America	Pancreatitis	Both	10 to 14	2040	1945.07	number
Incidence	High-income North America	Pancreatitis	Both	15 to 19	2040	4161.29	number
Incidence	High-income North America	Pancreatitis	Both	20 to 24	2040	7144.59	number
Incidence	Western Sub-Saharan Africa	Pancreatitis	Male	0 to 4	2040	893.417	number
Incidence	Western Sub-Saharan Africa	Pancreatitis	Male	5 to 9	2040	2198.65	number
Incidence	Western Sub-Saharan Africa	Pancreatitis	Male	10 to 14	2040	3065.02	number
Incidence	Western Sub-Saharan Africa	Pancreatitis	Male	15 to 19	2040	3918.66	number
Incidence	Western Sub-Saharan Africa	Pancreatitis	Male	20 to 24	2040	4624.56	number
Incidence	Western Sub-Saharan Africa	Pancreatitis	Female	0 to 4	2040	1139.92	number
Incidence	Western Sub-Saharan Africa	Pancreatitis	Female	5 to 9	2040	2709.47	number
Incidence	Western Sub-Saharan Africa	Pancreatitis	Female	10 to 14	2040	3704.43	number
Incidence	Western Sub-Saharan Africa	Pancreatitis	Female	15 to 19	2040	4685.14	number
Incidence	Western Sub-Saharan Africa	Pancreatitis	Female	20 to 24	2040	5473.31	number
Incidence	Western Sub-Saharan Africa	Pancreatitis	Both	0 to 4	2040	2033.34	number
Incidence	Western Sub-Saharan Africa	Pancreatitis	Both	5 to 9	2040	4908.13	number
Incidence	Western Sub-Saharan Africa	Pancreatitis	Both	10 to 14	2040	6769.45	number
Incidence	Western Sub-Saharan Africa	Pancreatitis	Both	15 to 19	2040	8603.8	number
Incidence	Western Sub-Saharan Africa	Pancreatitis	Both	20 to 24	2040	10097.9	number
Incidence	Oceania	Pancreatitis	Male	0 to 4	2040	15.8748	number
Incidence	Oceania	Pancreatitis	Male	5 to 9	2040	33.4871	number
Incidence	Oceania	Pancreatitis	Male	10 to 14	2040	45.0136	number
Incidence	Oceania	Pancreatitis	Male	15 to 19	2040	63.509	number
Incidence	Oceania	Pancreatitis	Male	20 to 24	2040	88.8327	number
Incidence	Oceania	Pancreatitis	Female	0 to 4	2040	18.5782	number
Incidence	Oceania	Pancreatitis	Female	5 to 9	2040	38.746	number
Incidence	Oceania	Pancreatitis	Female	10 to 14	2040	49.0122	number
Incidence	Oceania	Pancreatitis	Female	15 to 19	2040	61.7946	number
Incidence	Oceania	Pancreatitis	Female	20 to 24	2040	73.3188	number
Incidence	Oceania	Pancreatitis	Both	0 to 4	2040	34.453	number
Incidence	Oceania	Pancreatitis	Both	5 to 9	2040	72.233	number
Incidence	Oceania	Pancreatitis	Both	10 to 14	2040	94.0258	number
Incidence	Oceania	Pancreatitis	Both	15 to 19	2040	125.304	number
Incidence	Oceania	Pancreatitis	Both	20 to 24	2040	162.151	number
Incidence	East Asia	Pancreatitis	Male	0 to 4	2040	514.156	number
Incidence	East Asia	Pancreatitis	Male	5 to 9	2040	939.69	number
Incidence	East Asia	Pancreatitis	Male	10 to 14	2040	1383.26	number
Incidence	East Asia	Pancreatitis	Male	15 to 19	2040	2415.34	number
Incidence	East Asia	Pancreatitis	Male	20 to 24	2040	4680.57	number
Incidence	East Asia	Pancreatitis	Female	0 to 4	2040	522.965	number
Incidence	East Asia	Pancreatitis	Female	5 to 9	2040	935.892	number
Incidence	East Asia	Pancreatitis	Female	10 to 14	2040	1230.81	number
Incidence	East Asia	Pancreatitis	Female	15 to 19	2040	1805.6	number
Incidence	East Asia	Pancreatitis	Female	20 to 24	2040	2757.6	number
Incidence	East Asia	Pancreatitis	Both	0 to 4	2040	1037.12	number
Incidence	East Asia	Pancreatitis	Both	5 to 9	2040	1875.58	number
Incidence	East Asia	Pancreatitis	Both	10 to 14	2040	2614.07	number
Incidence	East Asia	Pancreatitis	Both	15 to 19	2040	4220.94	number
Incidence	East Asia	Pancreatitis	Both	20 to 24	2040	7438.17	number
Incidence	North Africa and Middle East	Pancreatitis	Male	0 to 4	2040	1344.19	number
Incidence	North Africa and Middle East	Pancreatitis	Male	5 to 9	2040	1723.6	number
Incidence	North Africa and Middle East	Pancreatitis	Male	10 to 14	2040	2658.47	number
Incidence	North Africa and Middle East	Pancreatitis	Male	15 to 19	2040	3707.73	number
Incidence	North Africa and Middle East	Pancreatitis	Male	20 to 24	2040	4559.16	number
Incidence	North Africa and Middle East	Pancreatitis	Female	0 to 4	2040	1148.51	number
Incidence	North Africa and Middle East	Pancreatitis	Female	5 to 9	2040	1541.73	number
Incidence	North Africa and Middle East	Pancreatitis	Female	10 to 14	2040	2194.38	number
Incidence	North Africa and Middle East	Pancreatitis	Female	15 to 19	2040	2889.89	number
Incidence	North Africa and Middle East	Pancreatitis	Female	20 to 24	2040	3516.83	number
Incidence	North Africa and Middle East	Pancreatitis	Both	0 to 4	2040	2492.7	number
Incidence	North Africa and Middle East	Pancreatitis	Both	5 to 9	2040	3265.33	number
Incidence	North Africa and Middle East	Pancreatitis	Both	10 to 14	2040	4852.85	number
Incidence	North Africa and Middle East	Pancreatitis	Both	15 to 19	2040	6597.62	number
Incidence	North Africa and Middle East	Pancreatitis	Both	20 to 24	2040	8075.99	number
Incidence	Western Europe	Pancreatitis	Male	0 to 4	2040	162.214	number
Incidence	Western Europe	Pancreatitis	Male	5 to 9	2040	356.81	number
Incidence	Western Europe	Pancreatitis	Male	10 to 14	2040	561.578	number
Incidence	Western Europe	Pancreatitis	Male	15 to 19	2040	1053.17	number
Incidence	Western Europe	Pancreatitis	Male	20 to 24	2040	1894.82	number
Incidence	Western Europe	Pancreatitis	Female	0 to 4	2040	195.666	number
Incidence	Western Europe	Pancreatitis	Female	5 to 9	2040	476.042	number
Incidence	Western Europe	Pancreatitis	Female	10 to 14	2040	713.236	number
Incidence	Western Europe	Pancreatitis	Female	15 to 19	2040	1302.48	number
Incidence	Western Europe	Pancreatitis	Female	20 to 24	2040	2044.94	number
Incidence	Western Europe	Pancreatitis	Both	0 to 4	2040	357.879	number
Incidence	Western Europe	Pancreatitis	Both	5 to 9	2040	832.852	number
Incidence	Western Europe	Pancreatitis	Both	10 to 14	2040	1274.81	number
Incidence	Western Europe	Pancreatitis	Both	15 to 19	2040	2355.65	number
Incidence	Western Europe	Pancreatitis	Both	20 to 24	2040	3939.76	number
Incidence	Southern Latin America	Pancreatitis	Male	0 to 4	2040	32.749	number
Incidence	Southern Latin America	Pancreatitis	Male	5 to 9	2040	82.4772	number
Incidence	Southern Latin America	Pancreatitis	Male	10 to 14	2040	135.234	number
Incidence	Southern Latin America	Pancreatitis	Male	15 to 19	2040	218.307	number
Incidence	Southern Latin America	Pancreatitis	Male	20 to 24	2040	333.419	number
Incidence	Southern Latin America	Pancreatitis	Female	0 to 4	2040	76.0732	number
Incidence	Southern Latin America	Pancreatitis	Female	5 to 9	2040	204.593	number
Incidence	Southern Latin America	Pancreatitis	Female	10 to 14	2040	365.657	number
Incidence	Southern Latin America	Pancreatitis	Female	15 to 19	2040	638.934	number
Incidence	Southern Latin America	Pancreatitis	Female	20 to 24	2040	932.576	number
Incidence	Southern Latin America	Pancreatitis	Both	0 to 4	2040	108.822	number
Incidence	Southern Latin America	Pancreatitis	Both	5 to 9	2040	287.07	number
Incidence	Southern Latin America	Pancreatitis	Both	10 to 14	2040	500.891	number
Incidence	Southern Latin America	Pancreatitis	Both	15 to 19	2040	857.241	number
Incidence	Southern Latin America	Pancreatitis	Both	20 to 24	2040	1266	number
Incidence	Andean Latin America	Pancreatitis	Male	0 to 4	2040	50.3535	number
Incidence	Andean Latin America	Pancreatitis	Male	5 to 9	2040	139.172	number
Incidence	Andean Latin America	Pancreatitis	Male	10 to 14	2040	237.431	number
Incidence	Andean Latin America	Pancreatitis	Male	15 to 19	2040	413.113	number
Incidence	Andean Latin America	Pancreatitis	Male	20 to 24	2040	636.75	number
Incidence	Andean Latin America	Pancreatitis	Female	0 to 4	2040	67.4422	number
Incidence	Andean Latin America	Pancreatitis	Female	5 to 9	2040	190.048	number
Incidence	Andean Latin America	Pancreatitis	Female	10 to 14	2040	352.877	number
Incidence	Andean Latin America	Pancreatitis	Female	15 to 19	2040	678.364	number
Incidence	Andean Latin America	Pancreatitis	Female	20 to 24	2040	1020.29	number
Incidence	Andean Latin America	Pancreatitis	Both	0 to 4	2040	117.796	number
Incidence	Andean Latin America	Pancreatitis	Both	5 to 9	2040	329.22	number
Incidence	Andean Latin America	Pancreatitis	Both	10 to 14	2040	590.307	number
Incidence	Andean Latin America	Pancreatitis	Both	15 to 19	2040	1091.48	number
Incidence	Andean Latin America	Pancreatitis	Both	20 to 24	2040	1657.04	number
Incidence	Eastern Sub-Saharan Africa	Pancreatitis	Male	0 to 4	2040	576.811	number
Incidence	Eastern Sub-Saharan Africa	Pancreatitis	Male	5 to 9	2040	1440.88	number
Incidence	Eastern Sub-Saharan Africa	Pancreatitis	Male	10 to 14	2040	2087.43	number
Incidence	Eastern Sub-Saharan Africa	Pancreatitis	Male	15 to 19	2040	2771.22	number
Incidence	Eastern Sub-Saharan Africa	Pancreatitis	Male	20 to 24	2040	3383.69	number
Incidence	Eastern Sub-Saharan Africa	Pancreatitis	Female	0 to 4	2040	689.488	number
Incidence	Eastern Sub-Saharan Africa	Pancreatitis	Female	5 to 9	2040	1694.49	number
Incidence	Eastern Sub-Saharan Africa	Pancreatitis	Female	10 to 14	2040	2439.92	number
Incidence	Eastern Sub-Saharan Africa	Pancreatitis	Female	15 to 19	2040	3238.72	number
Incidence	Eastern Sub-Saharan Africa	Pancreatitis	Female	20 to 24	2040	3943.51	number
Incidence	Eastern Sub-Saharan Africa	Pancreatitis	Both	0 to 4	2040	1266.3	number
Incidence	Eastern Sub-Saharan Africa	Pancreatitis	Both	5 to 9	2040	3135.37	number
Incidence	Eastern Sub-Saharan Africa	Pancreatitis	Both	10 to 14	2040	4527.35	number
Incidence	Eastern Sub-Saharan Africa	Pancreatitis	Both	15 to 19	2040	6009.95	number
Incidence	Eastern Sub-Saharan Africa	Pancreatitis	Both	20 to 24	2040	7327.2	number
Incidence	Central Sub-Saharan Africa	Pancreatitis	Male	0 to 4	2040	167.269	number
Incidence	Central Sub-Saharan Africa	Pancreatitis	Male	5 to 9	2040	416.737	number
Incidence	Central Sub-Saharan Africa	Pancreatitis	Male	10 to 14	2040	605.407	number
Incidence	Central Sub-Saharan Africa	Pancreatitis	Male	15 to 19	2040	818.902	number
Incidence	Central Sub-Saharan Africa	Pancreatitis	Male	20 to 24	2040	1019.34	number
Incidence	Central Sub-Saharan Africa	Pancreatitis	Female	0 to 4	2040	188.817	number
Incidence	Central Sub-Saharan Africa	Pancreatitis	Female	5 to 9	2040	464.118	number
Incidence	Central Sub-Saharan Africa	Pancreatitis	Female	10 to 14	2040	666.174	number
Incidence	Central Sub-Saharan Africa	Pancreatitis	Female	15 to 19	2040	897.121	number
Incidence	Central Sub-Saharan Africa	Pancreatitis	Female	20 to 24	2040	1114.44	number
Incidence	Central Sub-Saharan Africa	Pancreatitis	Both	0 to 4	2040	356.086	number
Incidence	Central Sub-Saharan Africa	Pancreatitis	Both	5 to 9	2040	880.855	number
Incidence	Central Sub-Saharan Africa	Pancreatitis	Both	10 to 14	2040	1271.58	number
Incidence	Central Sub-Saharan Africa	Pancreatitis	Both	15 to 19	2040	1716.02	number
Incidence	Central Sub-Saharan Africa	Pancreatitis	Both	20 to 24	2040	2133.78	number
Incidence	Eastern Europe	Pancreatitis	Male	0 to 4	2040	335.92	number
Incidence	Eastern Europe	Pancreatitis	Male	5 to 9	2040	649.787	number
Incidence	Eastern Europe	Pancreatitis	Male	10 to 14	2040	922.644	number
Incidence	Eastern Europe	Pancreatitis	Male	15 to 19	2040	1632.47	number
Incidence	Eastern Europe	Pancreatitis	Male	20 to 24	2040	3444.09	number
Incidence	Eastern Europe	Pancreatitis	Female	0 to 4	2040	342.507	number
Incidence	Eastern Europe	Pancreatitis	Female	5 to 9	2040	666.986	number
Incidence	Eastern Europe	Pancreatitis	Female	10 to 14	2040	877.261	number
Incidence	Eastern Europe	Pancreatitis	Female	15 to 19	2040	1292.64	number
Incidence	Eastern Europe	Pancreatitis	Female	20 to 24	2040	2084.62	number
Incidence	Eastern Europe	Pancreatitis	Both	0 to 4	2040	678.427	number
Incidence	Eastern Europe	Pancreatitis	Both	5 to 9	2040	1316.77	number
Incidence	Eastern Europe	Pancreatitis	Both	10 to 14	2040	1799.9	number
Incidence	Eastern Europe	Pancreatitis	Both	15 to 19	2040	2925.11	number
Incidence	Eastern Europe	Pancreatitis	Both	20 to 24	2040	5528.71	number
Incidence	South Asia	Pancreatitis	Male	0 to 4	2040	3196.35	number
Incidence	South Asia	Pancreatitis	Male	5 to 9	2040	5313.7	number
Incidence	South Asia	Pancreatitis	Male	10 to 14	2040	10057	number
Incidence	South Asia	Pancreatitis	Male	15 to 19	2040	16548.9	number
Incidence	South Asia	Pancreatitis	Male	20 to 24	2040	25067.9	number
Incidence	South Asia	Pancreatitis	Female	0 to 4	2040	2902.05	number
Incidence	South Asia	Pancreatitis	Female	5 to 9	2040	4727.74	number
Incidence	South Asia	Pancreatitis	Female	10 to 14	2040	9368.77	number
Incidence	South Asia	Pancreatitis	Female	15 to 19	2040	15493.9	number
Incidence	South Asia	Pancreatitis	Female	20 to 24	2040	19931.8	number
Incidence	South Asia	Pancreatitis	Both	0 to 4	2040	6098.4	number
Incidence	South Asia	Pancreatitis	Both	5 to 9	2040	10041.4	number
Incidence	South Asia	Pancreatitis	Both	10 to 14	2040	19425.7	number
Incidence	South Asia	Pancreatitis	Both	15 to 19	2040	32042.8	number
Incidence	South Asia	Pancreatitis	Both	20 to 24	2040	44999.7	number
Incidence	Australasia	Pancreatitis	Male	0 to 4	2040	12.8213	number
Incidence	Australasia	Pancreatitis	Male	5 to 9	2040	29.3709	number
Incidence	Australasia	Pancreatitis	Male	10 to 14	2040	49.8224	number
Incidence	Australasia	Pancreatitis	Male	15 to 19	2040	99.7868	number
Incidence	Australasia	Pancreatitis	Male	20 to 24	2040	169.387	number
Incidence	Australasia	Pancreatitis	Female	0 to 4	2040	22.0669	number
Incidence	Australasia	Pancreatitis	Female	5 to 9	2040	45.7046	number
Incidence	Australasia	Pancreatitis	Female	10 to 14	2040	78.3225	number
Incidence	Australasia	Pancreatitis	Female	15 to 19	2040	167.814	number
Incidence	Australasia	Pancreatitis	Female	20 to 24	2040	280.002	number
Incidence	Australasia	Pancreatitis	Both	0 to 4	2040	34.8882	number
Incidence	Australasia	Pancreatitis	Both	5 to 9	2040	75.0755	number
Incidence	Australasia	Pancreatitis	Both	10 to 14	2040	128.145	number
Incidence	Australasia	Pancreatitis	Both	15 to 19	2040	267.6	number
Incidence	Australasia	Pancreatitis	Both	20 to 24	2040	449.389	number
Incidence	High-income Asia Pacific	Pancreatitis	Male	0 to 4	2040	157.426	number
Incidence	High-income Asia Pacific	Pancreatitis	Male	5 to 9	2040	326.615	number
Incidence	High-income Asia Pacific	Pancreatitis	Male	10 to 14	2040	438.415	number
Incidence	High-income Asia Pacific	Pancreatitis	Male	15 to 19	2040	619.471	number
Incidence	High-income Asia Pacific	Pancreatitis	Male	20 to 24	2040	865.688	number
Incidence	High-income Asia Pacific	Pancreatitis	Female	0 to 4	2040	194.454	number
Incidence	High-income Asia Pacific	Pancreatitis	Female	5 to 9	2040	411.899	number
Incidence	High-income Asia Pacific	Pancreatitis	Female	10 to 14	2040	468.745	number
Incidence	High-income Asia Pacific	Pancreatitis	Female	15 to 19	2040	462.964	number
Incidence	High-income Asia Pacific	Pancreatitis	Female	20 to 24	2040	455.278	number
Incidence	High-income Asia Pacific	Pancreatitis	Both	0 to 4	2040	351.881	number
Incidence	High-income Asia Pacific	Pancreatitis	Both	5 to 9	2040	738.515	number
Incidence	High-income Asia Pacific	Pancreatitis	Both	10 to 14	2040	907.16	number
Incidence	High-income Asia Pacific	Pancreatitis	Both	15 to 19	2040	1082.43	number
Incidence	High-income Asia Pacific	Pancreatitis	Both	20 to 24	2040	1320.97	number
Incidence	Central Latin America	Pancreatitis	Male	0 to 4	2040	284.035	number
Incidence	Central Latin America	Pancreatitis	Male	5 to 9	2040	628.953	number
Incidence	Central Latin America	Pancreatitis	Male	10 to 14	2040	962.149	number
Incidence	Central Latin America	Pancreatitis	Male	15 to 19	2040	1656.01	number
Incidence	Central Latin America	Pancreatitis	Male	20 to 24	2040	3000.52	number
Incidence	Central Latin America	Pancreatitis	Female	0 to 4	2040	622.383	number
Incidence	Central Latin America	Pancreatitis	Female	5 to 9	2040	1551.82	number
Incidence	Central Latin America	Pancreatitis	Female	10 to 14	2040	1892.27	number
Incidence	Central Latin America	Pancreatitis	Female	15 to 19	2040	1952.14	number
Incidence	Central Latin America	Pancreatitis	Female	20 to 24	2040	2471.04	number
Incidence	Central Latin America	Pancreatitis	Both	0 to 4	2040	906.418	number
Incidence	Central Latin America	Pancreatitis	Both	5 to 9	2040	2180.78	number
Incidence	Central Latin America	Pancreatitis	Both	10 to 14	2040	2854.42	number
Incidence	Central Latin America	Pancreatitis	Both	15 to 19	2040	3608.15	number
Incidence	Central Latin America	Pancreatitis	Both	20 to 24	2040	5471.56	number
Incidence	Caribbean	Pancreatitis	Male	0 to 4	2040	28.002	number
Incidence	Caribbean	Pancreatitis	Male	5 to 9	2040	71.2213	number
Incidence	Caribbean	Pancreatitis	Male	10 to 14	2040	113.182	number
Incidence	Caribbean	Pancreatitis	Male	15 to 19	2040	179.008	number
Incidence	Caribbean	Pancreatitis	Male	20 to 24	2040	273.981	number
Incidence	Caribbean	Pancreatitis	Female	0 to 4	2040	45.2289	number
Incidence	Caribbean	Pancreatitis	Female	5 to 9	2040	119.284	number
Incidence	Caribbean	Pancreatitis	Female	10 to 14	2040	174.053	number
Incidence	Caribbean	Pancreatitis	Female	15 to 19	2040	227.951	number
Incidence	Caribbean	Pancreatitis	Female	20 to 24	2040	278.169	number
Incidence	Caribbean	Pancreatitis	Both	0 to 4	2040	73.2309	number
Incidence	Caribbean	Pancreatitis	Both	5 to 9	2040	190.505	number
Incidence	Caribbean	Pancreatitis	Both	10 to 14	2040	287.235	number
Incidence	Caribbean	Pancreatitis	Both	15 to 19	2040	406.959	number
Incidence	Caribbean	Pancreatitis	Both	20 to 24	2040	552.15	number
Incidence	Southern Sub-Saharan Africa	Pancreatitis	Male	0 to 4	2040	68.2417	number
Incidence	Southern Sub-Saharan Africa	Pancreatitis	Male	5 to 9	2040	166.091	number
Incidence	Southern Sub-Saharan Africa	Pancreatitis	Male	10 to 14	2040	246.007	number
Incidence	Southern Sub-Saharan Africa	Pancreatitis	Male	15 to 19	2040	347.34	number
Incidence	Southern Sub-Saharan Africa	Pancreatitis	Male	20 to 24	2040	454.968	number
Incidence	Southern Sub-Saharan Africa	Pancreatitis	Female	0 to 4	2040	86.2562	number
Incidence	Southern Sub-Saharan Africa	Pancreatitis	Female	5 to 9	2040	207.183	number
Incidence	Southern Sub-Saharan Africa	Pancreatitis	Female	10 to 14	2040	303.554	number
Incidence	Southern Sub-Saharan Africa	Pancreatitis	Female	15 to 19	2040	427.856	number
Incidence	Southern Sub-Saharan Africa	Pancreatitis	Female	20 to 24	2040	559.212	number
Incidence	Southern Sub-Saharan Africa	Pancreatitis	Both	0 to 4	2040	154.498	number
Incidence	Southern Sub-Saharan Africa	Pancreatitis	Both	5 to 9	2040	373.274	number
Incidence	Southern Sub-Saharan Africa	Pancreatitis	Both	10 to 14	2040	549.561	number
Incidence	Southern Sub-Saharan Africa	Pancreatitis	Both	15 to 19	2040	775.197	number
Incidence	Southern Sub-Saharan Africa	Pancreatitis	Both	20 to 24	2040	1014.18	number
Incidence	Tropical Latin America	Pancreatitis	Male	0 to 4	2040	45.8967	number
Incidence	Tropical Latin America	Pancreatitis	Male	5 to 9	2040	95.6578	number
Incidence	Tropical Latin America	Pancreatitis	Male	10 to 14	2040	137.265	number
Incidence	Tropical Latin America	Pancreatitis	Male	15 to 19	2040	256.933	number
Incidence	Tropical Latin America	Pancreatitis	Male	20 to 24	2040	555.284	number
Incidence	Tropical Latin America	Pancreatitis	Female	0 to 4	2040	57.3652	number
Incidence	Tropical Latin America	Pancreatitis	Female	5 to 9	2040	123.082	number
Incidence	Tropical Latin America	Pancreatitis	Female	10 to 14	2040	197.923	number
Incidence	Tropical Latin America	Pancreatitis	Female	15 to 19	2040	354.067	number
Incidence	Tropical Latin America	Pancreatitis	Female	20 to 24	2040	560.777	number
Incidence	Tropical Latin America	Pancreatitis	Both	0 to 4	2040	103.262	number
Incidence	Tropical Latin America	Pancreatitis	Both	5 to 9	2040	218.74	number
Incidence	Tropical Latin America	Pancreatitis	Both	10 to 14	2040	335.187	number
Incidence	Tropical Latin America	Pancreatitis	Both	15 to 19	2040	611	number
Incidence	Tropical Latin America	Pancreatitis	Both	20 to 24	2040	1116.06	number
Incidence	Southeast Asia	Pancreatitis	Male	0 to 4	2040	311.382	number
Incidence	Southeast Asia	Pancreatitis	Male	5 to 9	2040	841.265	number
Incidence	Southeast Asia	Pancreatitis	Male	10 to 14	2040	1447.63	number
Incidence	Southeast Asia	Pancreatitis	Male	15 to 19	2040	2416.71	number
Incidence	Southeast Asia	Pancreatitis	Male	20 to 24	2040	3751.24	number
Incidence	Southeast Asia	Pancreatitis	Female	0 to 4	2040	444.764	number
Incidence	Southeast Asia	Pancreatitis	Female	5 to 9	2040	1184.74	number
Incidence	Southeast Asia	Pancreatitis	Female	10 to 14	2040	1830.41	number
Incidence	Southeast Asia	Pancreatitis	Female	15 to 19	2040	2462.74	number
Incidence	Southeast Asia	Pancreatitis	Female	20 to 24	2040	2987.43	number
Incidence	Southeast Asia	Pancreatitis	Both	0 to 4	2040	756.147	number
Incidence	Southeast Asia	Pancreatitis	Both	5 to 9	2040	2026.01	number
Incidence	Southeast Asia	Pancreatitis	Both	10 to 14	2040	3278.04	number
Incidence	Southeast Asia	Pancreatitis	Both	15 to 19	2040	4879.46	number
Incidence	Southeast Asia	Pancreatitis	Both	20 to 24	2040	6738.67	number
