# Supplementary material for: Global, regional, and national burdens of pancreatitis in children and adolescents aged 0–24 years from 1992 to 2021: a trend analysisbased on the Global Burden of Disease Study 2021
Source: Research Square preprint supplement (doi:10.21203/rs.3.rs-5446819/v1), 2024-12-18
Supplement: Supplementary file 4 [file de50918f4984c6c9fd280cfd.xlsx]

## Sheet: Supplementary 1
Incidence and DALYs of pancreatitis among 0-24 year olds in 204 countries worldwide in 1992 and 2021
measure	location	sex	age	cause	metric	year	val	upper	lower
DALYs (Disability-Adjusted Life Years)	Saint Vincent and the Grenadines	Male	Age-standardized	Pancreatitis	Rate	1992	6.91007	9.04586	5.24589
DALYs (Disability-Adjusted Life Years)	Saint Vincent and the Grenadines	Male	Age-standardized	Pancreatitis	Rate	2021	6.53229	8.42886	4.99845
DALYs (Disability-Adjusted Life Years)	Saint Vincent and the Grenadines	Female	Age-standardized	Pancreatitis	Rate	1992	6.63738	8.4834	5.00268
DALYs (Disability-Adjusted Life Years)	Saint Vincent and the Grenadines	Female	Age-standardized	Pancreatitis	Rate	2021	7.11594	9.73695	5.1072
DALYs (Disability-Adjusted Life Years)	Saint Vincent and the Grenadines	Both	Age-standardized	Pancreatitis	Rate	1992	6.77613	8.30107	5.45923
DALYs (Disability-Adjusted Life Years)	Saint Vincent and the Grenadines	Both	Age-standardized	Pancreatitis	Rate	2021	6.81961	8.61538	5.34124
DALYs (Disability-Adjusted Life Years)	Azerbaijan	Male	Age-standardized	Pancreatitis	Rate	1992	8.80172	17.5871	3.29151
DALYs (Disability-Adjusted Life Years)	Azerbaijan	Male	Age-standardized	Pancreatitis	Rate	2021	6.70495	11.2933	3.70443
DALYs (Disability-Adjusted Life Years)	Azerbaijan	Female	Age-standardized	Pancreatitis	Rate	1992	4.03034	6.6023	2.20637
DALYs (Disability-Adjusted Life Years)	Azerbaijan	Female	Age-standardized	Pancreatitis	Rate	2021	3.28292	5.70351	1.78066
DALYs (Disability-Adjusted Life Years)	Azerbaijan	Both	Age-standardized	Pancreatitis	Rate	1992	6.40423	11.6081	2.88255
DALYs (Disability-Adjusted Life Years)	Azerbaijan	Both	Age-standardized	Pancreatitis	Rate	2021	5.07461	8.48381	2.92144
DALYs (Disability-Adjusted Life Years)	Japan	Male	Age-standardized	Pancreatitis	Rate	1992	4.52947	6.05949	3.59141
DALYs (Disability-Adjusted Life Years)	Japan	Male	Age-standardized	Pancreatitis	Rate	2021	2.88985	3.78271	2.28252
DALYs (Disability-Adjusted Life Years)	Japan	Female	Age-standardized	Pancreatitis	Rate	1992	3.70805	5.08727	2.8522
DALYs (Disability-Adjusted Life Years)	Japan	Female	Age-standardized	Pancreatitis	Rate	2021	2.31402	3.26945	1.6739
DALYs (Disability-Adjusted Life Years)	Japan	Both	Age-standardized	Pancreatitis	Rate	1992	4.12651	5.56604	3.23515
DALYs (Disability-Adjusted Life Years)	Japan	Both	Age-standardized	Pancreatitis	Rate	2021	2.60781	3.52766	1.99939
DALYs (Disability-Adjusted Life Years)	Nepal	Male	Age-standardized	Pancreatitis	Rate	1992	27.5516	56.3355	12.0243
DALYs (Disability-Adjusted Life Years)	Nepal	Male	Age-standardized	Pancreatitis	Rate	2021	19.2617	35.2723	9.33738
DALYs (Disability-Adjusted Life Years)	Nepal	Female	Age-standardized	Pancreatitis	Rate	1992	13.7623	29.4041	5.33311
DALYs (Disability-Adjusted Life Years)	Nepal	Female	Age-standardized	Pancreatitis	Rate	2021	7.99945	15.6885	3.61132
DALYs (Disability-Adjusted Life Years)	Nepal	Both	Age-standardized	Pancreatitis	Rate	1992	20.3516	36.2455	10.5309
DALYs (Disability-Adjusted Life Years)	Nepal	Both	Age-standardized	Pancreatitis	Rate	2021	13.4197	22.0885	7.61729
DALYs (Disability-Adjusted Life Years)	Samoa	Male	Age-standardized	Pancreatitis	Rate	1992	14.9916	27.9046	6.9629
DALYs (Disability-Adjusted Life Years)	Samoa	Male	Age-standardized	Pancreatitis	Rate	2021	12.5785	23.412	6.05404
DALYs (Disability-Adjusted Life Years)	Samoa	Female	Age-standardized	Pancreatitis	Rate	1992	8.08195	16.8103	3.11837
DALYs (Disability-Adjusted Life Years)	Samoa	Female	Age-standardized	Pancreatitis	Rate	2021	6.48854	13.0367	2.82335
DALYs (Disability-Adjusted Life Years)	Samoa	Both	Age-standardized	Pancreatitis	Rate	1992	11.9017	21.3707	5.98762
DALYs (Disability-Adjusted Life Years)	Samoa	Both	Age-standardized	Pancreatitis	Rate	2021	9.62935	17.7826	5.23144
DALYs (Disability-Adjusted Life Years)	Greece	Male	Age-standardized	Pancreatitis	Rate	1992	3.53619	4.44531	2.75887
DALYs (Disability-Adjusted Life Years)	Greece	Male	Age-standardized	Pancreatitis	Rate	2021	2.70434	3.49297	2.05829
DALYs (Disability-Adjusted Life Years)	Greece	Female	Age-standardized	Pancreatitis	Rate	1992	2.39956	3.00281	1.87646
DALYs (Disability-Adjusted Life Years)	Greece	Female	Age-standardized	Pancreatitis	Rate	2021	1.75998	2.25536	1.34662
DALYs (Disability-Adjusted Life Years)	Greece	Both	Age-standardized	Pancreatitis	Rate	1992	2.97969	3.5752	2.47098
DALYs (Disability-Adjusted Life Years)	Greece	Both	Age-standardized	Pancreatitis	Rate	2021	2.23873	2.78037	1.7847
DALYs (Disability-Adjusted Life Years)	Kenya	Male	Age-standardized	Pancreatitis	Rate	1992	7.15265	14.1336	3.25738
DALYs (Disability-Adjusted Life Years)	Kenya	Male	Age-standardized	Pancreatitis	Rate	2021	7.51504	12.2829	4.16041
DALYs (Disability-Adjusted Life Years)	Kenya	Female	Age-standardized	Pancreatitis	Rate	1992	1.71781	2.87761	0.909609
DALYs (Disability-Adjusted Life Years)	Kenya	Female	Age-standardized	Pancreatitis	Rate	2021	1.83809	3.06486	0.977791
DALYs (Disability-Adjusted Life Years)	Kenya	Both	Age-standardized	Pancreatitis	Rate	1992	4.3434	7.72771	2.22564
DALYs (Disability-Adjusted Life Years)	Kenya	Both	Age-standardized	Pancreatitis	Rate	2021	4.61774	7.13371	2.78589
DALYs (Disability-Adjusted Life Years)	Poland	Male	Age-standardized	Pancreatitis	Rate	1992	12.6395	14.3754	11.4669
DALYs (Disability-Adjusted Life Years)	Poland	Male	Age-standardized	Pancreatitis	Rate	2021	12.0584	13.4082	10.7037
DALYs (Disability-Adjusted Life Years)	Poland	Female	Age-standardized	Pancreatitis	Rate	1992	6.26624	7.47573	5.52037
DALYs (Disability-Adjusted Life Years)	Poland	Female	Age-standardized	Pancreatitis	Rate	2021	3.90775	4.80298	3.26481
DALYs (Disability-Adjusted Life Years)	Poland	Both	Age-standardized	Pancreatitis	Rate	1992	9.51229	10.9016	8.65147
DALYs (Disability-Adjusted Life Years)	Poland	Both	Age-standardized	Pancreatitis	Rate	2021	8.07837	9.08898	7.15711
DALYs (Disability-Adjusted Life Years)	Thailand	Male	Age-standardized	Pancreatitis	Rate	1992	9.65609	17.6001	4.24544
DALYs (Disability-Adjusted Life Years)	Thailand	Male	Age-standardized	Pancreatitis	Rate	2021	8.42136	14.8588	4.30938
DALYs (Disability-Adjusted Life Years)	Thailand	Female	Age-standardized	Pancreatitis	Rate	1992	2.93586	5.6076	1.36478
DALYs (Disability-Adjusted Life Years)	Thailand	Female	Age-standardized	Pancreatitis	Rate	2021	2.11843	3.39439	1.17799
DALYs (Disability-Adjusted Life Years)	Thailand	Both	Age-standardized	Pancreatitis	Rate	1992	6.33143	10.6047	3.30453
DALYs (Disability-Adjusted Life Years)	Thailand	Both	Age-standardized	Pancreatitis	Rate	2021	5.27002	8.8004	3.04817
DALYs (Disability-Adjusted Life Years)	Ghana	Male	Age-standardized	Pancreatitis	Rate	1992	8.0096	14.6203	3.96244
DALYs (Disability-Adjusted Life Years)	Ghana	Male	Age-standardized	Pancreatitis	Rate	2021	8.72185	18.6416	3.21538
DALYs (Disability-Adjusted Life Years)	Ghana	Female	Age-standardized	Pancreatitis	Rate	1992	2.27506	4.33961	0.966909
DALYs (Disability-Adjusted Life Years)	Ghana	Female	Age-standardized	Pancreatitis	Rate	2021	2.09727	3.68702	1.04485
DALYs (Disability-Adjusted Life Years)	Ghana	Both	Age-standardized	Pancreatitis	Rate	1992	5.07681	8.72722	2.71367
DALYs (Disability-Adjusted Life Years)	Ghana	Both	Age-standardized	Pancreatitis	Rate	2021	5.36345	10.4551	2.45944
DALYs (Disability-Adjusted Life Years)	Yemen	Male	Age-standardized	Pancreatitis	Rate	1992	2.01209	3.80664	0.932973
DALYs (Disability-Adjusted Life Years)	Yemen	Male	Age-standardized	Pancreatitis	Rate	2021	2.18463	4.20769	1.01062
DALYs (Disability-Adjusted Life Years)	Yemen	Female	Age-standardized	Pancreatitis	Rate	1992	1.78222	4.00283	0.667582
DALYs (Disability-Adjusted Life Years)	Yemen	Female	Age-standardized	Pancreatitis	Rate	2021	2.03575	3.92209	0.924401
DALYs (Disability-Adjusted Life Years)	Yemen	Both	Age-standardized	Pancreatitis	Rate	1992	1.90167	3.44976	0.956463
DALYs (Disability-Adjusted Life Years)	Yemen	Both	Age-standardized	Pancreatitis	Rate	2021	2.11058	3.6112	1.09726
DALYs (Disability-Adjusted Life Years)	Costa Rica	Male	Age-standardized	Pancreatitis	Rate	1992	10.3671	13.2236	8.07224
DALYs (Disability-Adjusted Life Years)	Costa Rica	Male	Age-standardized	Pancreatitis	Rate	2021	11.1227	13.9324	8.84741
DALYs (Disability-Adjusted Life Years)	Costa Rica	Female	Age-standardized	Pancreatitis	Rate	1992	11.2102	13.8211	8.91275
DALYs (Disability-Adjusted Life Years)	Costa Rica	Female	Age-standardized	Pancreatitis	Rate	2021	10.1057	12.5633	7.90711
DALYs (Disability-Adjusted Life Years)	Costa Rica	Both	Age-standardized	Pancreatitis	Rate	1992	10.7815	12.8195	9.10931
DALYs (Disability-Adjusted Life Years)	Costa Rica	Both	Age-standardized	Pancreatitis	Rate	2021	10.5979	12.5304	8.81423
DALYs (Disability-Adjusted Life Years)	Georgia	Male	Age-standardized	Pancreatitis	Rate	1992	3.03592	6.05923	1.25771
DALYs (Disability-Adjusted Life Years)	Georgia	Male	Age-standardized	Pancreatitis	Rate	2021	6.17865	9.90282	3.62464
DALYs (Disability-Adjusted Life Years)	Georgia	Female	Age-standardized	Pancreatitis	Rate	1992	2.30926	4.34947	1.12592
DALYs (Disability-Adjusted Life Years)	Georgia	Female	Age-standardized	Pancreatitis	Rate	2021	3.0647	5.22206	1.72585
DALYs (Disability-Adjusted Life Years)	Georgia	Both	Age-standardized	Pancreatitis	Rate	1992	2.67455	5.09591	1.23331
DALYs (Disability-Adjusted Life Years)	Georgia	Both	Age-standardized	Pancreatitis	Rate	2021	4.71718	7.71536	2.8053
DALYs (Disability-Adjusted Life Years)	Italy	Male	Age-standardized	Pancreatitis	Rate	1992	4.19643	4.73293	3.74238
DALYs (Disability-Adjusted Life Years)	Italy	Male	Age-standardized	Pancreatitis	Rate	2021	1.63624	1.9418	1.39837
DALYs (Disability-Adjusted Life Years)	Italy	Female	Age-standardized	Pancreatitis	Rate	1992	2.55151	2.99425	2.20128
DALYs (Disability-Adjusted Life Years)	Italy	Female	Age-standardized	Pancreatitis	Rate	2021	1.28006	1.6168	1.03478
DALYs (Disability-Adjusted Life Years)	Italy	Both	Age-standardized	Pancreatitis	Rate	1992	3.38961	3.83868	3.02772
DALYs (Disability-Adjusted Life Years)	Italy	Both	Age-standardized	Pancreatitis	Rate	2021	1.46504	1.77975	1.23484
DALYs (Disability-Adjusted Life Years)	Solomon Islands	Male	Age-standardized	Pancreatitis	Rate	1992	9.83804	22.2006	3.10166
DALYs (Disability-Adjusted Life Years)	Solomon Islands	Male	Age-standardized	Pancreatitis	Rate	2021	9.76127	19.3828	4.4461
DALYs (Disability-Adjusted Life Years)	Solomon Islands	Female	Age-standardized	Pancreatitis	Rate	1992	4.04133	8.50662	1.38333
DALYs (Disability-Adjusted Life Years)	Solomon Islands	Female	Age-standardized	Pancreatitis	Rate	2021	4.6381	9.38953	2.11305
DALYs (Disability-Adjusted Life Years)	Solomon Islands	Both	Age-standardized	Pancreatitis	Rate	1992	6.93047	14.2395	2.5017
DALYs (Disability-Adjusted Life Years)	Solomon Islands	Both	Age-standardized	Pancreatitis	Rate	2021	7.21223	13.4706	3.70294
DALYs (Disability-Adjusted Life Years)	Viet Nam	Male	Age-standardized	Pancreatitis	Rate	1992	6.19852	12.1368	2.7878
DALYs (Disability-Adjusted Life Years)	Viet Nam	Male	Age-standardized	Pancreatitis	Rate	2021	4.93073	9.18862	2.35554
DALYs (Disability-Adjusted Life Years)	Viet Nam	Female	Age-standardized	Pancreatitis	Rate	1992	1.44089	2.69032	0.73647
DALYs (Disability-Adjusted Life Years)	Viet Nam	Female	Age-standardized	Pancreatitis	Rate	2021	1.16254	2.24931	0.583077
DALYs (Disability-Adjusted Life Years)	Viet Nam	Both	Age-standardized	Pancreatitis	Rate	1992	3.76972	6.87659	1.90746
DALYs (Disability-Adjusted Life Years)	Viet Nam	Both	Age-standardized	Pancreatitis	Rate	2021	3.10053	5.44297	1.63707
DALYs (Disability-Adjusted Life Years)	Venezuela (Bolivarian Republic of)	Male	Age-standardized	Pancreatitis	Rate	1992	7.73393	9.6599	6.10269
DALYs (Disability-Adjusted Life Years)	Venezuela (Bolivarian Republic of)	Male	Age-standardized	Pancreatitis	Rate	2021	9.21689	12.5811	6.0868
DALYs (Disability-Adjusted Life Years)	Venezuela (Bolivarian Republic of)	Female	Age-standardized	Pancreatitis	Rate	1992	7.28142	8.94655	5.86643
DALYs (Disability-Adjusted Life Years)	Venezuela (Bolivarian Republic of)	Female	Age-standardized	Pancreatitis	Rate	2021	8.37804	11.5584	5.86733
DALYs (Disability-Adjusted Life Years)	Venezuela (Bolivarian Republic of)	Both	Age-standardized	Pancreatitis	Rate	1992	7.49855	8.90808	6.37858
DALYs (Disability-Adjusted Life Years)	Venezuela (Bolivarian Republic of)	Both	Age-standardized	Pancreatitis	Rate	2021	8.75043	11.446	6.34744
DALYs (Disability-Adjusted Life Years)	Palau	Male	Age-standardized	Pancreatitis	Rate	1992	15.2216	27.5919	6.44708
DALYs (Disability-Adjusted Life Years)	Palau	Male	Age-standardized	Pancreatitis	Rate	2021	12.4923	22.6317	5.76074
DALYs (Disability-Adjusted Life Years)	Palau	Female	Age-standardized	Pancreatitis	Rate	1992	11.3318	21.1334	5.01857
DALYs (Disability-Adjusted Life Years)	Palau	Female	Age-standardized	Pancreatitis	Rate	2021	17.8441	35.3803	7.98298
DALYs (Disability-Adjusted Life Years)	Palau	Both	Age-standardized	Pancreatitis	Rate	1992	13.3702	22.8923	6.7914
DALYs (Disability-Adjusted Life Years)	Palau	Both	Age-standardized	Pancreatitis	Rate	2021	15.3201	26.8618	8.34873
DALYs (Disability-Adjusted Life Years)	Palestine	Male	Age-standardized	Pancreatitis	Rate	1992	4.36504	8.69951	2.15617
DALYs (Disability-Adjusted Life Years)	Palestine	Male	Age-standardized	Pancreatitis	Rate	2021	2.68168	4.54136	1.54895
DALYs (Disability-Adjusted Life Years)	Palestine	Female	Age-standardized	Pancreatitis	Rate	1992	3.67411	7.06721	1.72444
DALYs (Disability-Adjusted Life Years)	Palestine	Female	Age-standardized	Pancreatitis	Rate	2021	2.19308	3.543	1.29248
DALYs (Disability-Adjusted Life Years)	Palestine	Both	Age-standardized	Pancreatitis	Rate	1992	4.02834	7.08422	2.26676
DALYs (Disability-Adjusted Life Years)	Palestine	Both	Age-standardized	Pancreatitis	Rate	2021	2.44353	3.72849	1.55498
DALYs (Disability-Adjusted Life Years)	Serbia	Male	Age-standardized	Pancreatitis	Rate	1992	8.66428	13.4893	5.05158
DALYs (Disability-Adjusted Life Years)	Serbia	Male	Age-standardized	Pancreatitis	Rate	2021	4.05655	6.23158	2.52063
DALYs (Disability-Adjusted Life Years)	Serbia	Female	Age-standardized	Pancreatitis	Rate	1992	5.9568	9.5532	3.33134
DALYs (Disability-Adjusted Life Years)	Serbia	Female	Age-standardized	Pancreatitis	Rate	2021	2.50025	3.99999	1.40342
DALYs (Disability-Adjusted Life Years)	Serbia	Both	Age-standardized	Pancreatitis	Rate	1992	7.34924	10.5311	4.82824
DALYs (Disability-Adjusted Life Years)	Serbia	Both	Age-standardized	Pancreatitis	Rate	2021	3.31047	4.64506	2.22472
DALYs (Disability-Adjusted Life Years)	Angola	Male	Age-standardized	Pancreatitis	Rate	1992	8.25299	17.0384	3.08144
DALYs (Disability-Adjusted Life Years)	Angola	Male	Age-standardized	Pancreatitis	Rate	2021	8.13232	15.4613	3.77792
DALYs (Disability-Adjusted Life Years)	Angola	Female	Age-standardized	Pancreatitis	Rate	1992	1.53606	3.30969	0.570239
DALYs (Disability-Adjusted Life Years)	Angola	Female	Age-standardized	Pancreatitis	Rate	2021	1.76593	3.39908	0.808888
DALYs (Disability-Adjusted Life Years)	Angola	Both	Age-standardized	Pancreatitis	Rate	1992	4.8998	9.30161	2.22358
DALYs (Disability-Adjusted Life Years)	Angola	Both	Age-standardized	Pancreatitis	Rate	2021	4.85388	8.52072	2.5038
DALYs (Disability-Adjusted Life Years)	Kyrgyzstan	Male	Age-standardized	Pancreatitis	Rate	1992	6.35612	9.54558	4.29424
DALYs (Disability-Adjusted Life Years)	Kyrgyzstan	Male	Age-standardized	Pancreatitis	Rate	2021	8.92402	13.0039	5.89305
DALYs (Disability-Adjusted Life Years)	Kyrgyzstan	Female	Age-standardized	Pancreatitis	Rate	1992	3.76716	5.92082	2.39482
DALYs (Disability-Adjusted Life Years)	Kyrgyzstan	Female	Age-standardized	Pancreatitis	Rate	2021	5.1113	7.36985	3.55425
DALYs (Disability-Adjusted Life Years)	Kyrgyzstan	Both	Age-standardized	Pancreatitis	Rate	1992	5.07213	7.67037	3.43584
DALYs (Disability-Adjusted Life Years)	Kyrgyzstan	Both	Age-standardized	Pancreatitis	Rate	2021	7.04181	10.1103	4.89589
DALYs (Disability-Adjusted Life Years)	Cook Islands	Male	Age-standardized	Pancreatitis	Rate	1992	27.2574	45.6708	15.1173
DALYs (Disability-Adjusted Life Years)	Cook Islands	Male	Age-standardized	Pancreatitis	Rate	2021	22.7816	38.5496	12.6783
DALYs (Disability-Adjusted Life Years)	Cook Islands	Female	Age-standardized	Pancreatitis	Rate	1992	6.00864	11.5448	3.08123
DALYs (Disability-Adjusted Life Years)	Cook Islands	Female	Age-standardized	Pancreatitis	Rate	2021	3.93827	9.48689	1.62741
DALYs (Disability-Adjusted Life Years)	Cook Islands	Both	Age-standardized	Pancreatitis	Rate	1992	16.8532	27.6307	9.95814
DALYs (Disability-Adjusted Life Years)	Cook Islands	Both	Age-standardized	Pancreatitis	Rate	2021	12.5711	21.7233	6.98246
DALYs (Disability-Adjusted Life Years)	Brazil	Male	Age-standardized	Pancreatitis	Rate	1992	10.9051	12.4744	9.70664
DALYs (Disability-Adjusted Life Years)	Brazil	Male	Age-standardized	Pancreatitis	Rate	2021	8.96165	9.83061	7.98874
DALYs (Disability-Adjusted Life Years)	Brazil	Female	Age-standardized	Pancreatitis	Rate	1992	6.29708	7.08783	5.67297
DALYs (Disability-Adjusted Life Years)	Brazil	Female	Age-standardized	Pancreatitis	Rate	2021	7.27075	8.08154	6.49868
DALYs (Disability-Adjusted Life Years)	Brazil	Both	Age-standardized	Pancreatitis	Rate	1992	8.57944	9.61126	7.7803
DALYs (Disability-Adjusted Life Years)	Brazil	Both	Age-standardized	Pancreatitis	Rate	2021	8.123	8.84512	7.3746
DALYs (Disability-Adjusted Life Years)	Trinidad and Tobago	Male	Age-standardized	Pancreatitis	Rate	1992	5.33921	6.86566	3.95597
DALYs (Disability-Adjusted Life Years)	Trinidad and Tobago	Male	Age-standardized	Pancreatitis	Rate	2021	5.53323	7.81645	3.9336
DALYs (Disability-Adjusted Life Years)	Trinidad and Tobago	Female	Age-standardized	Pancreatitis	Rate	1992	5.39838	6.82031	4.18818
DALYs (Disability-Adjusted Life Years)	Trinidad and Tobago	Female	Age-standardized	Pancreatitis	Rate	2021	4.39051	6.00624	3.05037
DALYs (Disability-Adjusted Life Years)	Trinidad and Tobago	Both	Age-standardized	Pancreatitis	Rate	1992	5.37089	6.57407	4.31084
DALYs (Disability-Adjusted Life Years)	Trinidad and Tobago	Both	Age-standardized	Pancreatitis	Rate	2021	4.97112	6.57954	3.67836
DALYs (Disability-Adjusted Life Years)	Panama	Male	Age-standardized	Pancreatitis	Rate	1992	6.32998	8.29057	4.82595
DALYs (Disability-Adjusted Life Years)	Panama	Male	Age-standardized	Pancreatitis	Rate	2021	5.7023	7.48467	4.19132
DALYs (Disability-Adjusted Life Years)	Panama	Female	Age-standardized	Pancreatitis	Rate	1992	7.32815	9.14446	5.76904
DALYs (Disability-Adjusted Life Years)	Panama	Female	Age-standardized	Pancreatitis	Rate	2021	5.8276	7.50055	4.34256
DALYs (Disability-Adjusted Life Years)	Panama	Both	Age-standardized	Pancreatitis	Rate	1992	6.82127	8.31942	5.56203
DALYs (Disability-Adjusted Life Years)	Panama	Both	Age-standardized	Pancreatitis	Rate	2021	5.76229	7.17107	4.42845
DALYs (Disability-Adjusted Life Years)	Vanuatu	Male	Age-standardized	Pancreatitis	Rate	1992	22.575	52.5283	7.33325
DALYs (Disability-Adjusted Life Years)	Vanuatu	Male	Age-standardized	Pancreatitis	Rate	2021	20.94	43.0145	8.13314
DALYs (Disability-Adjusted Life Years)	Vanuatu	Female	Age-standardized	Pancreatitis	Rate	1992	11.6333	25.4456	3.68716
DALYs (Disability-Adjusted Life Years)	Vanuatu	Female	Age-standardized	Pancreatitis	Rate	2021	10.4614	22.3149	3.80728
DALYs (Disability-Adjusted Life Years)	Vanuatu	Both	Age-standardized	Pancreatitis	Rate	1992	16.8899	35.9096	6.5625
DALYs (Disability-Adjusted Life Years)	Vanuatu	Both	Age-standardized	Pancreatitis	Rate	2021	15.5554	30.9142	7.0295
DALYs (Disability-Adjusted Life Years)	Ireland	Male	Age-standardized	Pancreatitis	Rate	1992	2.0728	2.63597	1.61658
DALYs (Disability-Adjusted Life Years)	Ireland	Male	Age-standardized	Pancreatitis	Rate	2021	1.0006	1.39052	0.723008
DALYs (Disability-Adjusted Life Years)	Ireland	Female	Age-standardized	Pancreatitis	Rate	1992	1.39327	1.83586	1.08514
DALYs (Disability-Adjusted Life Years)	Ireland	Female	Age-standardized	Pancreatitis	Rate	2021	0.777298	1.13765	0.533469
DALYs (Disability-Adjusted Life Years)	Ireland	Both	Age-standardized	Pancreatitis	Rate	1992	1.74106	2.16734	1.41896
DALYs (Disability-Adjusted Life Years)	Ireland	Both	Age-standardized	Pancreatitis	Rate	2021	0.890399	1.24631	0.651839
DALYs (Disability-Adjusted Life Years)	Antigua and Barbuda	Male	Age-standardized	Pancreatitis	Rate	1992	5.61386	8.29969	3.96647
DALYs (Disability-Adjusted Life Years)	Antigua and Barbuda	Male	Age-standardized	Pancreatitis	Rate	2021	4.97938	6.89874	3.72379
DALYs (Disability-Adjusted Life Years)	Antigua and Barbuda	Female	Age-standardized	Pancreatitis	Rate	1992	2.83105	3.64931	2.10137
DALYs (Disability-Adjusted Life Years)	Antigua and Barbuda	Female	Age-standardized	Pancreatitis	Rate	2021	2.22095	2.95226	1.6513
DALYs (Disability-Adjusted Life Years)	Antigua and Barbuda	Both	Age-standardized	Pancreatitis	Rate	1992	4.19989	5.62779	3.23697
DALYs (Disability-Adjusted Life Years)	Antigua and Barbuda	Both	Age-standardized	Pancreatitis	Rate	2021	3.62608	4.8338	2.83988
DALYs (Disability-Adjusted Life Years)	Bolivia (Plurinational State of)	Male	Age-standardized	Pancreatitis	Rate	1992	25.1111	46.4078	11.5967
DALYs (Disability-Adjusted Life Years)	Bolivia (Plurinational State of)	Male	Age-standardized	Pancreatitis	Rate	2021	17.0108	30.5356	8.73761
DALYs (Disability-Adjusted Life Years)	Bolivia (Plurinational State of)	Female	Age-standardized	Pancreatitis	Rate	1992	33.7513	68.85	11.6125
DALYs (Disability-Adjusted Life Years)	Bolivia (Plurinational State of)	Female	Age-standardized	Pancreatitis	Rate	2021	18.7981	36.6765	8.40687
DALYs (Disability-Adjusted Life Years)	Bolivia (Plurinational State of)	Both	Age-standardized	Pancreatitis	Rate	1992	29.4506	50.9274	15.0216
DALYs (Disability-Adjusted Life Years)	Bolivia (Plurinational State of)	Both	Age-standardized	Pancreatitis	Rate	2021	17.894	29.7885	10.2471
DALYs (Disability-Adjusted Life Years)	Malta	Male	Age-standardized	Pancreatitis	Rate	1992	2.47091	3.1316	1.88973
DALYs (Disability-Adjusted Life Years)	Malta	Male	Age-standardized	Pancreatitis	Rate	2021	1.79919	2.33746	1.34595
DALYs (Disability-Adjusted Life Years)	Malta	Female	Age-standardized	Pancreatitis	Rate	1992	1.98277	2.51017	1.528
DALYs (Disability-Adjusted Life Years)	Malta	Female	Age-standardized	Pancreatitis	Rate	2021	1.06251	1.36644	0.809623
DALYs (Disability-Adjusted Life Years)	Malta	Both	Age-standardized	Pancreatitis	Rate	1992	2.23371	2.67593	1.82356
DALYs (Disability-Adjusted Life Years)	Malta	Both	Age-standardized	Pancreatitis	Rate	2021	1.44087	1.79278	1.14219
DALYs (Disability-Adjusted Life Years)	Bangladesh	Male	Age-standardized	Pancreatitis	Rate	1992	26.5785	47.1496	13.5548
DALYs (Disability-Adjusted Life Years)	Bangladesh	Male	Age-standardized	Pancreatitis	Rate	2021	20.9735	39.6086	8.72489
DALYs (Disability-Adjusted Life Years)	Bangladesh	Female	Age-standardized	Pancreatitis	Rate	1992	8.04211	15.908	3.35761
DALYs (Disability-Adjusted Life Years)	Bangladesh	Female	Age-standardized	Pancreatitis	Rate	2021	9.12621	16.8433	4.08778
DALYs (Disability-Adjusted Life Years)	Bangladesh	Both	Age-standardized	Pancreatitis	Rate	1992	16.9297	27.5675	9.95659
DALYs (Disability-Adjusted Life Years)	Bangladesh	Both	Age-standardized	Pancreatitis	Rate	2021	14.7374	24.7177	7.59475
DALYs (Disability-Adjusted Life Years)	New Zealand	Male	Age-standardized	Pancreatitis	Rate	1992	1.39736	1.76556	1.11093
DALYs (Disability-Adjusted Life Years)	New Zealand	Male	Age-standardized	Pancreatitis	Rate	2021	0.952217	1.25765	0.718991
DALYs (Disability-Adjusted Life Years)	New Zealand	Female	Age-standardized	Pancreatitis	Rate	1992	1.34293	1.80926	0.993038
DALYs (Disability-Adjusted Life Years)	New Zealand	Female	Age-standardized	Pancreatitis	Rate	2021	0.914258	1.30479	0.622281
DALYs (Disability-Adjusted Life Years)	New Zealand	Both	Age-standardized	Pancreatitis	Rate	1992	1.36717	1.75435	1.07129
DALYs (Disability-Adjusted Life Years)	New Zealand	Both	Age-standardized	Pancreatitis	Rate	2021	0.934625	1.25857	0.695362
DALYs (Disability-Adjusted Life Years)	Oman	Male	Age-standardized	Pancreatitis	Rate	1992	2.05394	3.43465	1.15643
DALYs (Disability-Adjusted Life Years)	Oman	Male	Age-standardized	Pancreatitis	Rate	2021	1.60137	2.62322	0.881915
DALYs (Disability-Adjusted Life Years)	Oman	Female	Age-standardized	Pancreatitis	Rate	1992	1.23148	2.16516	0.649606
DALYs (Disability-Adjusted Life Years)	Oman	Female	Age-standardized	Pancreatitis	Rate	2021	0.997172	1.65407	0.549672
DALYs (Disability-Adjusted Life Years)	Oman	Both	Age-standardized	Pancreatitis	Rate	1992	1.67908	2.73256	0.987701
DALYs (Disability-Adjusted Life Years)	Oman	Both	Age-standardized	Pancreatitis	Rate	2021	1.32358	2.13743	0.764468
DALYs (Disability-Adjusted Life Years)	Rwanda	Male	Age-standardized	Pancreatitis	Rate	1992	8.98862	18.4095	3.84571
DALYs (Disability-Adjusted Life Years)	Rwanda	Male	Age-standardized	Pancreatitis	Rate	2021	7.45061	15.5443	2.90613
DALYs (Disability-Adjusted Life Years)	Rwanda	Female	Age-standardized	Pancreatitis	Rate	1992	2.35223	4.78646	1.06764
DALYs (Disability-Adjusted Life Years)	Rwanda	Female	Age-standardized	Pancreatitis	Rate	2021	2.08111	4.48098	0.849732
DALYs (Disability-Adjusted Life Years)	Rwanda	Both	Age-standardized	Pancreatitis	Rate	1992	5.64197	10.653	2.71203
DALYs (Disability-Adjusted Life Years)	Rwanda	Both	Age-standardized	Pancreatitis	Rate	2021	4.73282	9.21487	2.18274
DALYs (Disability-Adjusted Life Years)	Eritrea	Male	Age-standardized	Pancreatitis	Rate	1992	8.38125	16.9001	3.58027
DALYs (Disability-Adjusted Life Years)	Eritrea	Male	Age-standardized	Pancreatitis	Rate	2021	7.52281	14.8004	3.41676
DALYs (Disability-Adjusted Life Years)	Eritrea	Female	Age-standardized	Pancreatitis	Rate	1992	1.43618	2.84171	0.635731
DALYs (Disability-Adjusted Life Years)	Eritrea	Female	Age-standardized	Pancreatitis	Rate	2021	1.6868	3.28753	0.747994
DALYs (Disability-Adjusted Life Years)	Eritrea	Both	Age-standardized	Pancreatitis	Rate	1992	4.94613	9.35725	2.42381
DALYs (Disability-Adjusted Life Years)	Eritrea	Both	Age-standardized	Pancreatitis	Rate	2021	4.71447	8.56315	2.38688
DALYs (Disability-Adjusted Life Years)	Nigeria	Male	Age-standardized	Pancreatitis	Rate	1992	8.81903	13.6874	5.45756
DALYs (Disability-Adjusted Life Years)	Nigeria	Male	Age-standardized	Pancreatitis	Rate	2021	10.018	15.4315	5.56932
DALYs (Disability-Adjusted Life Years)	Nigeria	Female	Age-standardized	Pancreatitis	Rate	1992	1.99318	3.41673	0.975405
DALYs (Disability-Adjusted Life Years)	Nigeria	Female	Age-standardized	Pancreatitis	Rate	2021	2.26654	3.77546	1.09563
DALYs (Disability-Adjusted Life Years)	Nigeria	Both	Age-standardized	Pancreatitis	Rate	1992	5.19937	7.73532	3.25838
DALYs (Disability-Adjusted Life Years)	Nigeria	Both	Age-standardized	Pancreatitis	Rate	2021	5.90277	8.86083	3.35305
DALYs (Disability-Adjusted Life Years)	Tajikistan	Male	Age-standardized	Pancreatitis	Rate	1992	5.77544	10.5	2.66452
DALYs (Disability-Adjusted Life Years)	Tajikistan	Male	Age-standardized	Pancreatitis	Rate	2021	5.40749	9.95115	2.70503
DALYs (Disability-Adjusted Life Years)	Tajikistan	Female	Age-standardized	Pancreatitis	Rate	1992	6.99713	12.8285	2.98062
DALYs (Disability-Adjusted Life Years)	Tajikistan	Female	Age-standardized	Pancreatitis	Rate	2021	5.705	10.8933	2.75681
DALYs (Disability-Adjusted Life Years)	Tajikistan	Both	Age-standardized	Pancreatitis	Rate	1992	6.37175	10.7648	3.19783
DALYs (Disability-Adjusted Life Years)	Tajikistan	Both	Age-standardized	Pancreatitis	Rate	2021	5.54841	9.59272	3.12559
DALYs (Disability-Adjusted Life Years)	Grenada	Male	Age-standardized	Pancreatitis	Rate	1992	5.46118	7.26421	4.04423
DALYs (Disability-Adjusted Life Years)	Grenada	Male	Age-standardized	Pancreatitis	Rate	2021	3.18186	4.33836	2.30734
DALYs (Disability-Adjusted Life Years)	Grenada	Female	Age-standardized	Pancreatitis	Rate	1992	8.85969	11.3701	6.66083
DALYs (Disability-Adjusted Life Years)	Grenada	Female	Age-standardized	Pancreatitis	Rate	2021	4.42573	6.05076	3.24152
DALYs (Disability-Adjusted Life Years)	Grenada	Both	Age-standardized	Pancreatitis	Rate	1992	7.13635	8.92153	5.66079
DALYs (Disability-Adjusted Life Years)	Grenada	Both	Age-standardized	Pancreatitis	Rate	2021	3.76631	4.93144	2.88946
DALYs (Disability-Adjusted Life Years)	Netherlands	Male	Age-standardized	Pancreatitis	Rate	1992	1.96957	2.51201	1.54183
DALYs (Disability-Adjusted Life Years)	Netherlands	Male	Age-standardized	Pancreatitis	Rate	2021	1.09813	1.50068	0.829027
DALYs (Disability-Adjusted Life Years)	Netherlands	Female	Age-standardized	Pancreatitis	Rate	1992	1.37467	1.76781	1.05892
DALYs (Disability-Adjusted Life Years)	Netherlands	Female	Age-standardized	Pancreatitis	Rate	2021	0.897607	1.24939	0.651993
DALYs (Disability-Adjusted Life Years)	Netherlands	Both	Age-standardized	Pancreatitis	Rate	1992	1.67801	2.08489	1.37021
DALYs (Disability-Adjusted Life Years)	Netherlands	Both	Age-standardized	Pancreatitis	Rate	2021	0.999893	1.33614	0.77417
DALYs (Disability-Adjusted Life Years)	Zimbabwe	Male	Age-standardized	Pancreatitis	Rate	1992	7.26293	13.3016	3.13306
DALYs (Disability-Adjusted Life Years)	Zimbabwe	Male	Age-standardized	Pancreatitis	Rate	2021	10.0797	19.4881	4.46193
DALYs (Disability-Adjusted Life Years)	Zimbabwe	Female	Age-standardized	Pancreatitis	Rate	1992	0.76435	1.38501	0.389366
DALYs (Disability-Adjusted Life Years)	Zimbabwe	Female	Age-standardized	Pancreatitis	Rate	2021	1.10603	2.0696	0.512065
DALYs (Disability-Adjusted Life Years)	Zimbabwe	Both	Age-standardized	Pancreatitis	Rate	1992	3.90391	6.93607	1.79109
DALYs (Disability-Adjusted Life Years)	Zimbabwe	Both	Age-standardized	Pancreatitis	Rate	2021	5.44225	10.2114	2.68246
DALYs (Disability-Adjusted Life Years)	Kiribati	Male	Age-standardized	Pancreatitis	Rate	1992	43.3443	74.3399	21.9172
DALYs (Disability-Adjusted Life Years)	Kiribati	Male	Age-standardized	Pancreatitis	Rate	2021	39.0051	69.558	18.5564
DALYs (Disability-Adjusted Life Years)	Kiribati	Female	Age-standardized	Pancreatitis	Rate	1992	15.0145	29.8822	6.04051
DALYs (Disability-Adjusted Life Years)	Kiribati	Female	Age-standardized	Pancreatitis	Rate	2021	15.9316	33.7383	6.68923
DALYs (Disability-Adjusted Life Years)	Kiribati	Both	Age-standardized	Pancreatitis	Rate	1992	28.7824	47.3649	15.5868
DALYs (Disability-Adjusted Life Years)	Kiribati	Both	Age-standardized	Pancreatitis	Rate	2021	27.1554	47.6951	14.3704
DALYs (Disability-Adjusted Life Years)	Pakistan	Male	Age-standardized	Pancreatitis	Rate	1992	12.3017	25.4465	5.9129
DALYs (Disability-Adjusted Life Years)	Pakistan	Male	Age-standardized	Pancreatitis	Rate	2021	9.25899	15.404	4.71897
DALYs (Disability-Adjusted Life Years)	Pakistan	Female	Age-standardized	Pancreatitis	Rate	1992	13.329	24.4406	5.7404
DALYs (Disability-Adjusted Life Years)	Pakistan	Female	Age-standardized	Pancreatitis	Rate	2021	14.4949	24.3071	7.01014
DALYs (Disability-Adjusted Life Years)	Pakistan	Both	Age-standardized	Pancreatitis	Rate	1992	12.7896	20.6148	7.31307
DALYs (Disability-Adjusted Life Years)	Pakistan	Both	Age-standardized	Pancreatitis	Rate	2021	11.7885	17.3822	7.19014
DALYs (Disability-Adjusted Life Years)	Mali	Male	Age-standardized	Pancreatitis	Rate	1992	14.0824	34.3922	5.43859
DALYs (Disability-Adjusted Life Years)	Mali	Male	Age-standardized	Pancreatitis	Rate	2021	14.0077	27.5126	6.32292
DALYs (Disability-Adjusted Life Years)	Mali	Female	Age-standardized	Pancreatitis	Rate	1992	2.64143	5.65989	0.985851
DALYs (Disability-Adjusted Life Years)	Mali	Female	Age-standardized	Pancreatitis	Rate	2021	3.16186	6.09954	1.37897
DALYs (Disability-Adjusted Life Years)	Mali	Both	Age-standardized	Pancreatitis	Rate	1992	8.16648	18.1583	3.53221
DALYs (Disability-Adjusted Life Years)	Mali	Both	Age-standardized	Pancreatitis	Rate	2021	8.50186	15.7397	4.32163
DALYs (Disability-Adjusted Life Years)	Brunei Darussalam	Male	Age-standardized	Pancreatitis	Rate	1992	3.62435	6.6792	1.75598
DALYs (Disability-Adjusted Life Years)	Brunei Darussalam	Male	Age-standardized	Pancreatitis	Rate	2021	2.28528	3.81652	1.28988
DALYs (Disability-Adjusted Life Years)	Brunei Darussalam	Female	Age-standardized	Pancreatitis	Rate	1992	5.06958	8.38634	2.73121
DALYs (Disability-Adjusted Life Years)	Brunei Darussalam	Female	Age-standardized	Pancreatitis	Rate	2021	3.15963	4.98067	1.87786
DALYs (Disability-Adjusted Life Years)	Brunei Darussalam	Both	Age-standardized	Pancreatitis	Rate	1992	4.32675	6.98517	2.483
DALYs (Disability-Adjusted Life Years)	Brunei Darussalam	Both	Age-standardized	Pancreatitis	Rate	2021	2.70056	4.07496	1.74502
DALYs (Disability-Adjusted Life Years)	Nicaragua	Male	Age-standardized	Pancreatitis	Rate	1992	12.3332	20.3121	6.87556
DALYs (Disability-Adjusted Life Years)	Nicaragua	Male	Age-standardized	Pancreatitis	Rate	2021	7.46463	13.1289	4.2391
DALYs (Disability-Adjusted Life Years)	Nicaragua	Female	Age-standardized	Pancreatitis	Rate	1992	12.842	20.4734	7.02417
DALYs (Disability-Adjusted Life Years)	Nicaragua	Female	Age-standardized	Pancreatitis	Rate	2021	7.72436	12.4748	4.37014
DALYs (Disability-Adjusted Life Years)	Nicaragua	Both	Age-standardized	Pancreatitis	Rate	1992	12.5696	18.0249	8.1342
DALYs (Disability-Adjusted Life Years)	Nicaragua	Both	Age-standardized	Pancreatitis	Rate	2021	7.58879	11.2547	4.87158
DALYs (Disability-Adjusted Life Years)	Uzbekistan	Male	Age-standardized	Pancreatitis	Rate	1992	6.76707	10.1849	4.39715
DALYs (Disability-Adjusted Life Years)	Uzbekistan	Male	Age-standardized	Pancreatitis	Rate	2021	6.6174	9.99981	4.3618
DALYs (Disability-Adjusted Life Years)	Uzbekistan	Female	Age-standardized	Pancreatitis	Rate	1992	4.91569	7.30772	3.06169
DALYs (Disability-Adjusted Life Years)	Uzbekistan	Female	Age-standardized	Pancreatitis	Rate	2021	4.3013	6.4827	2.79873
DALYs (Disability-Adjusted Life Years)	Uzbekistan	Both	Age-standardized	Pancreatitis	Rate	1992	5.83674	8.66613	3.78737
DALYs (Disability-Adjusted Life Years)	Uzbekistan	Both	Age-standardized	Pancreatitis	Rate	2021	5.48214	8.14979	3.7123
DALYs (Disability-Adjusted Life Years)	Tokelau	Male	Age-standardized	Pancreatitis	Rate	1992	18.3062	39.6178	6.87233
DALYs (Disability-Adjusted Life Years)	Tokelau	Male	Age-standardized	Pancreatitis	Rate	2021	20.4218	37.8261	9.55471
DALYs (Disability-Adjusted Life Years)	Tokelau	Female	Age-standardized	Pancreatitis	Rate	1992	12.0365	24.5554	5.27684
DALYs (Disability-Adjusted Life Years)	Tokelau	Female	Age-standardized	Pancreatitis	Rate	2021	29.6821	64.0326	12.6171
DALYs (Disability-Adjusted Life Years)	Tokelau	Both	Age-standardized	Pancreatitis	Rate	1992	15.3286	28.8234	7.17487
DALYs (Disability-Adjusted Life Years)	Tokelau	Both	Age-standardized	Pancreatitis	Rate	2021	24.8214	47.3967	12.5311
DALYs (Disability-Adjusted Life Years)	Micronesia (Federated States of)	Male	Age-standardized	Pancreatitis	Rate	1992	21.3008	38.0012	9.89896
DALYs (Disability-Adjusted Life Years)	Micronesia (Federated States of)	Male	Age-standardized	Pancreatitis	Rate	2021	17.5298	32.6352	7.96964
DALYs (Disability-Adjusted Life Years)	Micronesia (Federated States of)	Female	Age-standardized	Pancreatitis	Rate	1992	13.8395	25.775	6.15063
DALYs (Disability-Adjusted Life Years)	Micronesia (Federated States of)	Female	Age-standardized	Pancreatitis	Rate	2021	8.95711	18.4367	4.08977
DALYs (Disability-Adjusted Life Years)	Micronesia (Federated States of)	Both	Age-standardized	Pancreatitis	Rate	1992	17.3442	28.8503	9.37333
DALYs (Disability-Adjusted Life Years)	Micronesia (Federated States of)	Both	Age-standardized	Pancreatitis	Rate	2021	13.3637	24.3627	6.79648
DALYs (Disability-Adjusted Life Years)	Andorra	Male	Age-standardized	Pancreatitis	Rate	1992	2.3497	3.99336	1.18996
DALYs (Disability-Adjusted Life Years)	Andorra	Male	Age-standardized	Pancreatitis	Rate	2021	1.74366	3.0345	0.928429
DALYs (Disability-Adjusted Life Years)	Andorra	Female	Age-standardized	Pancreatitis	Rate	1992	1.96429	3.40249	1.04359
DALYs (Disability-Adjusted Life Years)	Andorra	Female	Age-standardized	Pancreatitis	Rate	2021	1.31683	2.18748	0.742366
DALYs (Disability-Adjusted Life Years)	Andorra	Both	Age-standardized	Pancreatitis	Rate	1992	2.16646	3.33502	1.24075
DALYs (Disability-Adjusted Life Years)	Andorra	Both	Age-standardized	Pancreatitis	Rate	2021	1.53969	2.38373	0.955466
DALYs (Disability-Adjusted Life Years)	Romania	Male	Age-standardized	Pancreatitis	Rate	1992	16.8017	20.989	13.0476
DALYs (Disability-Adjusted Life Years)	Romania	Male	Age-standardized	Pancreatitis	Rate	2021	11.6163	14.7454	9.12168
DALYs (Disability-Adjusted Life Years)	Romania	Female	Age-standardized	Pancreatitis	Rate	1992	9.37207	11.75	7.29429
DALYs (Disability-Adjusted Life Years)	Romania	Female	Age-standardized	Pancreatitis	Rate	2021	4.34325	5.53359	3.33489
DALYs (Disability-Adjusted Life Years)	Romania	Both	Age-standardized	Pancreatitis	Rate	1992	13.1353	16.0887	10.6652
DALYs (Disability-Adjusted Life Years)	Romania	Both	Age-standardized	Pancreatitis	Rate	2021	8.08502	10.1105	6.43879
DALYs (Disability-Adjusted Life Years)	Timor-Leste	Male	Age-standardized	Pancreatitis	Rate	1992	7.71176	18.3098	2.76642
DALYs (Disability-Adjusted Life Years)	Timor-Leste	Male	Age-standardized	Pancreatitis	Rate	2021	6.77125	13.9235	2.53587
DALYs (Disability-Adjusted Life Years)	Timor-Leste	Female	Age-standardized	Pancreatitis	Rate	1992	2.62112	5.91654	1.07694
DALYs (Disability-Adjusted Life Years)	Timor-Leste	Female	Age-standardized	Pancreatitis	Rate	2021	2.41409	5.26559	1.11825
DALYs (Disability-Adjusted Life Years)	Timor-Leste	Both	Age-standardized	Pancreatitis	Rate	1992	5.27903	11.3104	2.36297
DALYs (Disability-Adjusted Life Years)	Timor-Leste	Both	Age-standardized	Pancreatitis	Rate	2021	4.60861	8.93905	2.15979
DALYs (Disability-Adjusted Life Years)	Bosnia and Herzegovina	Male	Age-standardized	Pancreatitis	Rate	1992	9.33083	15.154	5.15667
DALYs (Disability-Adjusted Life Years)	Bosnia and Herzegovina	Male	Age-standardized	Pancreatitis	Rate	2021	6.06251	9.17398	3.72151
DALYs (Disability-Adjusted Life Years)	Bosnia and Herzegovina	Female	Age-standardized	Pancreatitis	Rate	1992	5.09268	8.09658	2.91623
DALYs (Disability-Adjusted Life Years)	Bosnia and Herzegovina	Female	Age-standardized	Pancreatitis	Rate	2021	3.16825	4.84917	1.88572
DALYs (Disability-Adjusted Life Years)	Bosnia and Herzegovina	Both	Age-standardized	Pancreatitis	Rate	1992	7.29528	10.9698	4.49119
DALYs (Disability-Adjusted Life Years)	Bosnia and Herzegovina	Both	Age-standardized	Pancreatitis	Rate	2021	4.64786	6.74577	3.14616
DALYs (Disability-Adjusted Life Years)	Portugal	Male	Age-standardized	Pancreatitis	Rate	1992	6.82447	8.49696	5.29128
DALYs (Disability-Adjusted Life Years)	Portugal	Male	Age-standardized	Pancreatitis	Rate	2021	2.41455	3.09024	1.76902
DALYs (Disability-Adjusted Life Years)	Portugal	Female	Age-standardized	Pancreatitis	Rate	1992	4.13368	5.1888	3.24808
DALYs (Disability-Adjusted Life Years)	Portugal	Female	Age-standardized	Pancreatitis	Rate	2021	1.77114	2.24582	1.36332
DALYs (Disability-Adjusted Life Years)	Portugal	Both	Age-standardized	Pancreatitis	Rate	1992	5.49748	6.4487	4.58664
DALYs (Disability-Adjusted Life Years)	Portugal	Both	Age-standardized	Pancreatitis	Rate	2021	2.09889	2.58523	1.66538
DALYs (Disability-Adjusted Life Years)	Indonesia	Male	Age-standardized	Pancreatitis	Rate	1992	9.91593	16.1049	6.35215
DALYs (Disability-Adjusted Life Years)	Indonesia	Male	Age-standardized	Pancreatitis	Rate	2021	8.89885	15.2293	5.63457
DALYs (Disability-Adjusted Life Years)	Indonesia	Female	Age-standardized	Pancreatitis	Rate	1992	3.94938	7.9287	1.98208
DALYs (Disability-Adjusted Life Years)	Indonesia	Female	Age-standardized	Pancreatitis	Rate	2021	2.65619	5.21001	1.72418
DALYs (Disability-Adjusted Life Years)	Indonesia	Both	Age-standardized	Pancreatitis	Rate	1992	6.87207	10.8669	4.77873
DALYs (Disability-Adjusted Life Years)	Indonesia	Both	Age-standardized	Pancreatitis	Rate	2021	5.86724	9.4688	3.93683
DALYs (Disability-Adjusted Life Years)	Estonia	Male	Age-standardized	Pancreatitis	Rate	1992	18.8659	25.1969	14.2017
DALYs (Disability-Adjusted Life Years)	Estonia	Male	Age-standardized	Pancreatitis	Rate	2021	13.0577	19.0942	8.06053
DALYs (Disability-Adjusted Life Years)	Estonia	Female	Age-standardized	Pancreatitis	Rate	1992	7.82051	11.3452	5.45131
DALYs (Disability-Adjusted Life Years)	Estonia	Female	Age-standardized	Pancreatitis	Rate	2021	8.49566	12.407	5.82524
DALYs (Disability-Adjusted Life Years)	Estonia	Both	Age-standardized	Pancreatitis	Rate	1992	13.4839	17.9399	10.3277
DALYs (Disability-Adjusted Life Years)	Estonia	Both	Age-standardized	Pancreatitis	Rate	2021	10.8383	15.3908	7.28876
DALYs (Disability-Adjusted Life Years)	Mauritania	Male	Age-standardized	Pancreatitis	Rate	1992	12.0175	22.1534	5.61802
DALYs (Disability-Adjusted Life Years)	Mauritania	Male	Age-standardized	Pancreatitis	Rate	2021	11.6477	21.203	5.45241
DALYs (Disability-Adjusted Life Years)	Mauritania	Female	Age-standardized	Pancreatitis	Rate	1992	1.83395	3.91214	0.669333
DALYs (Disability-Adjusted Life Years)	Mauritania	Female	Age-standardized	Pancreatitis	Rate	2021	1.84228	3.40844	0.906757
DALYs (Disability-Adjusted Life Years)	Mauritania	Both	Age-standardized	Pancreatitis	Rate	1992	6.77769	11.9713	3.27625
DALYs (Disability-Adjusted Life Years)	Mauritania	Both	Age-standardized	Pancreatitis	Rate	2021	6.57886	11.5058	3.34095
DALYs (Disability-Adjusted Life Years)	Lithuania	Male	Age-standardized	Pancreatitis	Rate	1992	16.7607	21.0697	13.1343
DALYs (Disability-Adjusted Life Years)	Lithuania	Male	Age-standardized	Pancreatitis	Rate	2021	16.5015	21.2607	12.2571
DALYs (Disability-Adjusted Life Years)	Lithuania	Female	Age-standardized	Pancreatitis	Rate	1992	7.51158	9.79865	5.80777
DALYs (Disability-Adjusted Life Years)	Lithuania	Female	Age-standardized	Pancreatitis	Rate	2021	7.25316	9.66387	5.29337
DALYs (Disability-Adjusted Life Years)	Lithuania	Both	Age-standardized	Pancreatitis	Rate	1992	12.2137	15.2257	9.78419
DALYs (Disability-Adjusted Life Years)	Lithuania	Both	Age-standardized	Pancreatitis	Rate	2021	12.0098	15.1381	9.17728
DALYs (Disability-Adjusted Life Years)	Uruguay	Male	Age-standardized	Pancreatitis	Rate	1992	4.92112	6.60147	3.80479
DALYs (Disability-Adjusted Life Years)	Uruguay	Male	Age-standardized	Pancreatitis	Rate	2021	4.78713	6.1	3.73796
DALYs (Disability-Adjusted Life Years)	Uruguay	Female	Age-standardized	Pancreatitis	Rate	1992	8.92203	11.0046	7.11535
DALYs (Disability-Adjusted Life Years)	Uruguay	Female	Age-standardized	Pancreatitis	Rate	2021	6.00173	7.43692	4.7768
DALYs (Disability-Adjusted Life Years)	Uruguay	Both	Age-standardized	Pancreatitis	Rate	1992	6.90348	8.27924	5.77837
DALYs (Disability-Adjusted Life Years)	Uruguay	Both	Age-standardized	Pancreatitis	Rate	2021	5.38209	6.41275	4.51844
DALYs (Disability-Adjusted Life Years)	Tunisia	Male	Age-standardized	Pancreatitis	Rate	1992	2.77485	4.88721	1.41304
DALYs (Disability-Adjusted Life Years)	Tunisia	Male	Age-standardized	Pancreatitis	Rate	2021	2.59014	5.06149	1.3037
DALYs (Disability-Adjusted Life Years)	Tunisia	Female	Age-standardized	Pancreatitis	Rate	1992	2.16001	4.38509	0.993667
DALYs (Disability-Adjusted Life Years)	Tunisia	Female	Age-standardized	Pancreatitis	Rate	2021	1.88982	3.48358	1.01318
DALYs (Disability-Adjusted Life Years)	Tunisia	Both	Age-standardized	Pancreatitis	Rate	1992	2.47159	4.05513	1.40197
DALYs (Disability-Adjusted Life Years)	Tunisia	Both	Age-standardized	Pancreatitis	Rate	2021	2.24765	3.85965	1.26779
DALYs (Disability-Adjusted Life Years)	Gabon	Male	Age-standardized	Pancreatitis	Rate	1992	7.40886	13.779	3.54965
DALYs (Disability-Adjusted Life Years)	Gabon	Male	Age-standardized	Pancreatitis	Rate	2021	8.01624	15.4321	3.60623
DALYs (Disability-Adjusted Life Years)	Gabon	Female	Age-standardized	Pancreatitis	Rate	1992	1.55031	2.92389	0.665874
DALYs (Disability-Adjusted Life Years)	Gabon	Female	Age-standardized	Pancreatitis	Rate	2021	1.55879	2.86963	0.77034
DALYs (Disability-Adjusted Life Years)	Gabon	Both	Age-standardized	Pancreatitis	Rate	1992	4.38622	7.67688	2.26863
DALYs (Disability-Adjusted Life Years)	Gabon	Both	Age-standardized	Pancreatitis	Rate	2021	4.56654	8.1334	2.31011
DALYs (Disability-Adjusted Life Years)	Uganda	Male	Age-standardized	Pancreatitis	Rate	1992	4.95467	10.3018	2.1164
DALYs (Disability-Adjusted Life Years)	Uganda	Male	Age-standardized	Pancreatitis	Rate	2021	5.16275	9.93678	2.50529
DALYs (Disability-Adjusted Life Years)	Uganda	Female	Age-standardized	Pancreatitis	Rate	1992	1.06162	2.03877	0.509576
DALYs (Disability-Adjusted Life Years)	Uganda	Female	Age-standardized	Pancreatitis	Rate	2021	1.3893	2.52287	0.697746
DALYs (Disability-Adjusted Life Years)	Uganda	Both	Age-standardized	Pancreatitis	Rate	1992	2.91936	5.57767	1.42001
DALYs (Disability-Adjusted Life Years)	Uganda	Both	Age-standardized	Pancreatitis	Rate	2021	3.25001	5.65375	1.776
DALYs (Disability-Adjusted Life Years)	Austria	Male	Age-standardized	Pancreatitis	Rate	1992	4.08399	5.0574	3.21166
DALYs (Disability-Adjusted Life Years)	Austria	Male	Age-standardized	Pancreatitis	Rate	2021	2.25121	2.8374	1.74292
DALYs (Disability-Adjusted Life Years)	Austria	Female	Age-standardized	Pancreatitis	Rate	1992	1.95295	2.45088	1.53674
DALYs (Disability-Adjusted Life Years)	Austria	Female	Age-standardized	Pancreatitis	Rate	2021	1.26334	1.63544	0.951063
DALYs (Disability-Adjusted Life Years)	Austria	Both	Age-standardized	Pancreatitis	Rate	1992	3.04087	3.62769	2.51703
DALYs (Disability-Adjusted Life Years)	Austria	Both	Age-standardized	Pancreatitis	Rate	2021	1.78009	2.18871	1.42157
DALYs (Disability-Adjusted Life Years)	Malawi	Male	Age-standardized	Pancreatitis	Rate	1992	8.56931	17.4871	3.92189
DALYs (Disability-Adjusted Life Years)	Malawi	Male	Age-standardized	Pancreatitis	Rate	2021	8.18781	15.11	3.8454
DALYs (Disability-Adjusted Life Years)	Malawi	Female	Age-standardized	Pancreatitis	Rate	1992	1.83897	3.56434	0.91815
DALYs (Disability-Adjusted Life Years)	Malawi	Female	Age-standardized	Pancreatitis	Rate	2021	1.83027	3.52394	0.893982
DALYs (Disability-Adjusted Life Years)	Malawi	Both	Age-standardized	Pancreatitis	Rate	1992	5.12379	9.73122	2.61273
DALYs (Disability-Adjusted Life Years)	Malawi	Both	Age-standardized	Pancreatitis	Rate	2021	4.90951	8.37859	2.67423
DALYs (Disability-Adjusted Life Years)	Togo	Male	Age-standardized	Pancreatitis	Rate	1992	13.1141	24.9069	6.23397
DALYs (Disability-Adjusted Life Years)	Togo	Male	Age-standardized	Pancreatitis	Rate	2021	12.482	24.4725	5.01816
DALYs (Disability-Adjusted Life Years)	Togo	Female	Age-standardized	Pancreatitis	Rate	1992	2.54544	5.06588	1.09233
DALYs (Disability-Adjusted Life Years)	Togo	Female	Age-standardized	Pancreatitis	Rate	2021	2.58546	4.7648	1.18623
DALYs (Disability-Adjusted Life Years)	Togo	Both	Age-standardized	Pancreatitis	Rate	1992	7.70551	13.7659	4.01252
DALYs (Disability-Adjusted Life Years)	Togo	Both	Age-standardized	Pancreatitis	Rate	2021	7.61551	13.8197	3.59918
DALYs (Disability-Adjusted Life Years)	Sierra Leone	Male	Age-standardized	Pancreatitis	Rate	1992	10.6375	21.0533	5.18002
DALYs (Disability-Adjusted Life Years)	Sierra Leone	Male	Age-standardized	Pancreatitis	Rate	2021	11.5279	22.0881	5.64585
DALYs (Disability-Adjusted Life Years)	Sierra Leone	Female	Age-standardized	Pancreatitis	Rate	1992	1.7521	3.66876	0.710054
DALYs (Disability-Adjusted Life Years)	Sierra Leone	Female	Age-standardized	Pancreatitis	Rate	2021	2.36875	4.39007	1.11132
DALYs (Disability-Adjusted Life Years)	Sierra Leone	Both	Age-standardized	Pancreatitis	Rate	1992	5.90965	11.2083	2.988
DALYs (Disability-Adjusted Life Years)	Sierra Leone	Both	Age-standardized	Pancreatitis	Rate	2021	6.8179	12.5205	3.64919
DALYs (Disability-Adjusted Life Years)	Dominica	Male	Age-standardized	Pancreatitis	Rate	1992	7.13358	11.8383	4.08204
DALYs (Disability-Adjusted Life Years)	Dominica	Male	Age-standardized	Pancreatitis	Rate	2021	6.70537	11.1234	3.60139
DALYs (Disability-Adjusted Life Years)	Dominica	Female	Age-standardized	Pancreatitis	Rate	1992	7.43001	13.085	3.83358
DALYs (Disability-Adjusted Life Years)	Dominica	Female	Age-standardized	Pancreatitis	Rate	2021	7.45558	12.8386	3.864
DALYs (Disability-Adjusted Life Years)	Dominica	Both	Age-standardized	Pancreatitis	Rate	1992	7.27733	10.9683	4.51212
DALYs (Disability-Adjusted Life Years)	Dominica	Both	Age-standardized	Pancreatitis	Rate	2021	7.06967	10.495	4.42801
DALYs (Disability-Adjusted Life Years)	Sweden	Male	Age-standardized	Pancreatitis	Rate	1992	1.84213	2.63146	1.32678
DALYs (Disability-Adjusted Life Years)	Sweden	Male	Age-standardized	Pancreatitis	Rate	2021	1.83508	2.72916	1.26083
DALYs (Disability-Adjusted Life Years)	Sweden	Female	Age-standardized	Pancreatitis	Rate	1992	1.21741	1.85522	0.771614
DALYs (Disability-Adjusted Life Years)	Sweden	Female	Age-standardized	Pancreatitis	Rate	2021	1.40819	2.19259	0.875793
DALYs (Disability-Adjusted Life Years)	Sweden	Both	Age-standardized	Pancreatitis	Rate	1992	1.53599	2.22708	1.06844
DALYs (Disability-Adjusted Life Years)	Sweden	Both	Age-standardized	Pancreatitis	Rate	2021	1.63203	2.45423	1.09782
DALYs (Disability-Adjusted Life Years)	Cyprus	Male	Age-standardized	Pancreatitis	Rate	1992	2.65605	4.64582	1.35813
DALYs (Disability-Adjusted Life Years)	Cyprus	Male	Age-standardized	Pancreatitis	Rate	2021	1.5961	2.65402	0.882315
DALYs (Disability-Adjusted Life Years)	Cyprus	Female	Age-standardized	Pancreatitis	Rate	1992	2.09144	4.07876	0.999523
DALYs (Disability-Adjusted Life Years)	Cyprus	Female	Age-standardized	Pancreatitis	Rate	2021	0.748275	1.28199	0.407676
DALYs (Disability-Adjusted Life Years)	Cyprus	Both	Age-standardized	Pancreatitis	Rate	1992	2.38457	3.79052	1.38945
DALYs (Disability-Adjusted Life Years)	Cyprus	Both	Age-standardized	Pancreatitis	Rate	2021	1.18609	1.80982	0.734551
DALYs (Disability-Adjusted Life Years)	Croatia	Male	Age-standardized	Pancreatitis	Rate	1992	8.9911	10.8213	7.39315
DALYs (Disability-Adjusted Life Years)	Croatia	Male	Age-standardized	Pancreatitis	Rate	2021	4.1784	5.08719	3.20053
DALYs (Disability-Adjusted Life Years)	Croatia	Female	Age-standardized	Pancreatitis	Rate	1992	4.35416	5.10184	3.58787
DALYs (Disability-Adjusted Life Years)	Croatia	Female	Age-standardized	Pancreatitis	Rate	2021	1.92502	2.39685	1.46092
DALYs (Disability-Adjusted Life Years)	Croatia	Both	Age-standardized	Pancreatitis	Rate	1992	6.70916	7.8046	5.73453
DALYs (Disability-Adjusted Life Years)	Croatia	Both	Age-standardized	Pancreatitis	Rate	2021	3.07883	3.63777	2.44116
DALYs (Disability-Adjusted Life Years)	Guatemala	Male	Age-standardized	Pancreatitis	Rate	1992	49.8633	64.7076	36.9242
DALYs (Disability-Adjusted Life Years)	Guatemala	Male	Age-standardized	Pancreatitis	Rate	2021	29.6073	38.087	21.9184
DALYs (Disability-Adjusted Life Years)	Guatemala	Female	Age-standardized	Pancreatitis	Rate	1992	33.5967	43.6088	20.815
DALYs (Disability-Adjusted Life Years)	Guatemala	Female	Age-standardized	Pancreatitis	Rate	2021	17.271	22.3135	12.7582
DALYs (Disability-Adjusted Life Years)	Guatemala	Both	Age-standardized	Pancreatitis	Rate	1992	41.4186	50.624	30.6082
DALYs (Disability-Adjusted Life Years)	Guatemala	Both	Age-standardized	Pancreatitis	Rate	2021	23.3117	28.4713	18.2089
DALYs (Disability-Adjusted Life Years)	United Kingdom	Male	Age-standardized	Pancreatitis	Rate	1992	2.93008	3.35355	2.65507
DALYs (Disability-Adjusted Life Years)	United Kingdom	Male	Age-standardized	Pancreatitis	Rate	2021	2.62092	3.02065	2.29913
DALYs (Disability-Adjusted Life Years)	United Kingdom	Female	Age-standardized	Pancreatitis	Rate	1992	2.85226	3.21834	2.58322
DALYs (Disability-Adjusted Life Years)	United Kingdom	Female	Age-standardized	Pancreatitis	Rate	2021	1.78656	2.138	1.51547
DALYs (Disability-Adjusted Life Years)	United Kingdom	Both	Age-standardized	Pancreatitis	Rate	1992	2.88913	3.27354	2.6343
DALYs (Disability-Adjusted Life Years)	United Kingdom	Both	Age-standardized	Pancreatitis	Rate	2021	2.20619	2.57126	1.92302
DALYs (Disability-Adjusted Life Years)	Mauritius	Male	Age-standardized	Pancreatitis	Rate	1992	24.1344	30.2849	19.2958
DALYs (Disability-Adjusted Life Years)	Mauritius	Male	Age-standardized	Pancreatitis	Rate	2021	13.4637	17.2132	10.2943
DALYs (Disability-Adjusted Life Years)	Mauritius	Female	Age-standardized	Pancreatitis	Rate	1992	5.11665	6.45154	3.92452
DALYs (Disability-Adjusted Life Years)	Mauritius	Female	Age-standardized	Pancreatitis	Rate	2021	1.99441	2.5563	1.51723
DALYs (Disability-Adjusted Life Years)	Mauritius	Both	Age-standardized	Pancreatitis	Rate	1992	14.7695	18.0968	12.1368
DALYs (Disability-Adjusted Life Years)	Mauritius	Both	Age-standardized	Pancreatitis	Rate	2021	7.77607	9.77294	6.08052
DALYs (Disability-Adjusted Life Years)	Iran (Islamic Republic of)	Male	Age-standardized	Pancreatitis	Rate	1992	2.52434	3.9686	1.46106
DALYs (Disability-Adjusted Life Years)	Iran (Islamic Republic of)	Male	Age-standardized	Pancreatitis	Rate	2021	2.4533	3.9113	1.34123
DALYs (Disability-Adjusted Life Years)	Iran (Islamic Republic of)	Female	Age-standardized	Pancreatitis	Rate	1992	2.25027	3.59946	1.23595
DALYs (Disability-Adjusted Life Years)	Iran (Islamic Republic of)	Female	Age-standardized	Pancreatitis	Rate	2021	1.99444	3.15201	1.11853
DALYs (Disability-Adjusted Life Years)	Iran (Islamic Republic of)	Both	Age-standardized	Pancreatitis	Rate	1992	2.38902	3.62073	1.48648
DALYs (Disability-Adjusted Life Years)	Iran (Islamic Republic of)	Both	Age-standardized	Pancreatitis	Rate	2021	2.22921	3.46803	1.33589
DALYs (Disability-Adjusted Life Years)	North Macedonia	Male	Age-standardized	Pancreatitis	Rate	1992	5.76486	8.76799	3.63278
DALYs (Disability-Adjusted Life Years)	North Macedonia	Male	Age-standardized	Pancreatitis	Rate	2021	4.46912	7.08388	2.60289
DALYs (Disability-Adjusted Life Years)	North Macedonia	Female	Age-standardized	Pancreatitis	Rate	1992	4.17511	6.24459	2.55717
DALYs (Disability-Adjusted Life Years)	North Macedonia	Female	Age-standardized	Pancreatitis	Rate	2021	2.5325	4.09507	1.4209
DALYs (Disability-Adjusted Life Years)	North Macedonia	Both	Age-standardized	Pancreatitis	Rate	1992	4.98582	6.92595	3.50217
DALYs (Disability-Adjusted Life Years)	North Macedonia	Both	Age-standardized	Pancreatitis	Rate	2021	3.53644	5.43716	2.20335
DALYs (Disability-Adjusted Life Years)	Senegal	Male	Age-standardized	Pancreatitis	Rate	1992	17.3174	33.3979	8.55954
DALYs (Disability-Adjusted Life Years)	Senegal	Male	Age-standardized	Pancreatitis	Rate	2021	15.1008	27.6108	7.32381
DALYs (Disability-Adjusted Life Years)	Senegal	Female	Age-standardized	Pancreatitis	Rate	1992	2.63732	5.28543	1.09809
DALYs (Disability-Adjusted Life Years)	Senegal	Female	Age-standardized	Pancreatitis	Rate	2021	2.39963	4.4572	1.16596
DALYs (Disability-Adjusted Life Years)	Senegal	Both	Age-standardized	Pancreatitis	Rate	1992	9.65581	17.7243	5.11541
DALYs (Disability-Adjusted Life Years)	Senegal	Both	Age-standardized	Pancreatitis	Rate	2021	8.93801	15.796	4.55697
DALYs (Disability-Adjusted Life Years)	South Sudan	Male	Age-standardized	Pancreatitis	Rate	1992	6.94931	15.9738	2.73118
DALYs (Disability-Adjusted Life Years)	South Sudan	Male	Age-standardized	Pancreatitis	Rate	2021	7.69665	16.0374	3.28349
DALYs (Disability-Adjusted Life Years)	South Sudan	Female	Age-standardized	Pancreatitis	Rate	1992	1.52659	3.1105	0.683206
DALYs (Disability-Adjusted Life Years)	South Sudan	Female	Age-standardized	Pancreatitis	Rate	2021	1.89055	3.79608	0.900299
DALYs (Disability-Adjusted Life Years)	South Sudan	Both	Age-standardized	Pancreatitis	Rate	1992	4.34072	9.166	1.97313
DALYs (Disability-Adjusted Life Years)	South Sudan	Both	Age-standardized	Pancreatitis	Rate	2021	4.75913	9.05998	2.38702
DALYs (Disability-Adjusted Life Years)	Finland	Male	Age-standardized	Pancreatitis	Rate	1992	5.22151	6.4397	4.00922
DALYs (Disability-Adjusted Life Years)	Finland	Male	Age-standardized	Pancreatitis	Rate	2021	3.69906	4.57118	2.94317
DALYs (Disability-Adjusted Life Years)	Finland	Female	Age-standardized	Pancreatitis	Rate	1992	2.10256	2.61051	1.6379
DALYs (Disability-Adjusted Life Years)	Finland	Female	Age-standardized	Pancreatitis	Rate	2021	1.57896	2.00552	1.19079
DALYs (Disability-Adjusted Life Years)	Finland	Both	Age-standardized	Pancreatitis	Rate	1992	3.69557	4.38143	2.99101
DALYs (Disability-Adjusted Life Years)	Finland	Both	Age-standardized	Pancreatitis	Rate	2021	2.66752	3.19922	2.20342
DALYs (Disability-Adjusted Life Years)	Israel	Male	Age-standardized	Pancreatitis	Rate	1992	2.5728	3.27576	2.00165
DALYs (Disability-Adjusted Life Years)	Israel	Male	Age-standardized	Pancreatitis	Rate	2021	1.39095	1.79161	1.06765
DALYs (Disability-Adjusted Life Years)	Israel	Female	Age-standardized	Pancreatitis	Rate	1992	2.09859	2.64991	1.58711
DALYs (Disability-Adjusted Life Years)	Israel	Female	Age-standardized	Pancreatitis	Rate	2021	1.15126	1.51742	0.862425
DALYs (Disability-Adjusted Life Years)	Israel	Both	Age-standardized	Pancreatitis	Rate	1992	2.33997	2.81089	1.92084
DALYs (Disability-Adjusted Life Years)	Israel	Both	Age-standardized	Pancreatitis	Rate	2021	1.27345	1.60678	1.02098
DALYs (Disability-Adjusted Life Years)	Ukraine	Male	Age-standardized	Pancreatitis	Rate	1992	30.63	42.9045	20.2887
DALYs (Disability-Adjusted Life Years)	Ukraine	Male	Age-standardized	Pancreatitis	Rate	2021	25.2632	37.6272	16.26
DALYs (Disability-Adjusted Life Years)	Ukraine	Female	Age-standardized	Pancreatitis	Rate	1992	14.4274	20.3414	9.5293
DALYs (Disability-Adjusted Life Years)	Ukraine	Female	Age-standardized	Pancreatitis	Rate	2021	11.157	17.8752	6.57024
DALYs (Disability-Adjusted Life Years)	Ukraine	Both	Age-standardized	Pancreatitis	Rate	1992	22.6058	30.7098	15.6913
DALYs (Disability-Adjusted Life Years)	Ukraine	Both	Age-standardized	Pancreatitis	Rate	2021	18.3972	26.1831	12.8057
DALYs (Disability-Adjusted Life Years)	Iraq	Male	Age-standardized	Pancreatitis	Rate	1992	2.76795	4.51812	1.53034
DALYs (Disability-Adjusted Life Years)	Iraq	Male	Age-standardized	Pancreatitis	Rate	2021	2.03994	3.43902	1.10885
DALYs (Disability-Adjusted Life Years)	Iraq	Female	Age-standardized	Pancreatitis	Rate	1992	3.46423	6.21365	1.63967
DALYs (Disability-Adjusted Life Years)	Iraq	Female	Age-standardized	Pancreatitis	Rate	2021	2.02523	3.55762	1.0503
DALYs (Disability-Adjusted Life Years)	Iraq	Both	Age-standardized	Pancreatitis	Rate	1992	3.10031	4.78052	1.84112
DALYs (Disability-Adjusted Life Years)	Iraq	Both	Age-standardized	Pancreatitis	Rate	2021	2.03248	3.19842	1.23081
DALYs (Disability-Adjusted Life Years)	Namibia	Male	Age-standardized	Pancreatitis	Rate	1992	7.5169	19.801	2.77346
DALYs (Disability-Adjusted Life Years)	Namibia	Male	Age-standardized	Pancreatitis	Rate	2021	6.61688	14.7355	2.74563
DALYs (Disability-Adjusted Life Years)	Namibia	Female	Age-standardized	Pancreatitis	Rate	1992	1.39864	2.76746	0.52673
DALYs (Disability-Adjusted Life Years)	Namibia	Female	Age-standardized	Pancreatitis	Rate	2021	1.23344	2.51385	0.500992
DALYs (Disability-Adjusted Life Years)	Namibia	Both	Age-standardized	Pancreatitis	Rate	1992	4.38645	10.548	1.79907
DALYs (Disability-Adjusted Life Years)	Namibia	Both	Age-standardized	Pancreatitis	Rate	2021	3.89419	8.18232	1.76083
DALYs (Disability-Adjusted Life Years)	Suriname	Male	Age-standardized	Pancreatitis	Rate	1992	11.3348	18.3174	6.37336
DALYs (Disability-Adjusted Life Years)	Suriname	Male	Age-standardized	Pancreatitis	Rate	2021	9.32763	16.0218	4.81801
DALYs (Disability-Adjusted Life Years)	Suriname	Female	Age-standardized	Pancreatitis	Rate	1992	9.62885	16.4603	4.66101
DALYs (Disability-Adjusted Life Years)	Suriname	Female	Age-standardized	Pancreatitis	Rate	2021	7.64717	13.0743	3.91541
DALYs (Disability-Adjusted Life Years)	Suriname	Both	Age-standardized	Pancreatitis	Rate	1992	10.5062	15.4007	6.60925
DALYs (Disability-Adjusted Life Years)	Suriname	Both	Age-standardized	Pancreatitis	Rate	2021	8.50654	13.1681	5.22443
DALYs (Disability-Adjusted Life Years)	Greenland	Male	Age-standardized	Pancreatitis	Rate	1992	6.03382	12.6543	2.03323
DALYs (Disability-Adjusted Life Years)	Greenland	Male	Age-standardized	Pancreatitis	Rate	2021	3.76367	6.93867	2.03711
DALYs (Disability-Adjusted Life Years)	Greenland	Female	Age-standardized	Pancreatitis	Rate	1992	5.59293	11.7	2.76333
DALYs (Disability-Adjusted Life Years)	Greenland	Female	Age-standardized	Pancreatitis	Rate	2021	3.4312	6.626	1.81911
DALYs (Disability-Adjusted Life Years)	Greenland	Both	Age-standardized	Pancreatitis	Rate	1992	5.81338	10.713	2.8026
DALYs (Disability-Adjusted Life Years)	Greenland	Both	Age-standardized	Pancreatitis	Rate	2021	3.59619	5.96208	2.2259
DALYs (Disability-Adjusted Life Years)	Germany	Male	Age-standardized	Pancreatitis	Rate	1992	3.66065	4.4987	2.8992
DALYs (Disability-Adjusted Life Years)	Germany	Male	Age-standardized	Pancreatitis	Rate	2021	1.94392	2.43211	1.52192
DALYs (Disability-Adjusted Life Years)	Germany	Female	Age-standardized	Pancreatitis	Rate	1992	2.16844	2.66788	1.72401
DALYs (Disability-Adjusted Life Years)	Germany	Female	Age-standardized	Pancreatitis	Rate	2021	1.50794	1.87154	1.17479
DALYs (Disability-Adjusted Life Years)	Germany	Both	Age-standardized	Pancreatitis	Rate	1992	2.93615	3.50552	2.43927
DALYs (Disability-Adjusted Life Years)	Germany	Both	Age-standardized	Pancreatitis	Rate	2021	1.74046	2.11021	1.42174
DALYs (Disability-Adjusted Life Years)	Philippines	Male	Age-standardized	Pancreatitis	Rate	1992	5.65618	7.95632	3.25973
DALYs (Disability-Adjusted Life Years)	Philippines	Male	Age-standardized	Pancreatitis	Rate	2021	5.11304	7.17503	3.39028
DALYs (Disability-Adjusted Life Years)	Philippines	Female	Age-standardized	Pancreatitis	Rate	1992	1.64941	2.61444	0.972
DALYs (Disability-Adjusted Life Years)	Philippines	Female	Age-standardized	Pancreatitis	Rate	2021	1.5473	2.42236	1.00025
DALYs (Disability-Adjusted Life Years)	Philippines	Both	Age-standardized	Pancreatitis	Rate	1992	3.65309	5.04695	2.28403
DALYs (Disability-Adjusted Life Years)	Philippines	Both	Age-standardized	Pancreatitis	Rate	2021	3.36817	4.64434	2.38133
DALYs (Disability-Adjusted Life Years)	Haiti	Male	Age-standardized	Pancreatitis	Rate	1992	8.62977	19.3639	3.52838
DALYs (Disability-Adjusted Life Years)	Haiti	Male	Age-standardized	Pancreatitis	Rate	2021	7.34931	15.5993	2.96416
DALYs (Disability-Adjusted Life Years)	Haiti	Female	Age-standardized	Pancreatitis	Rate	1992	13.5856	32.4145	4.76334
DALYs (Disability-Adjusted Life Years)	Haiti	Female	Age-standardized	Pancreatitis	Rate	2021	11.9413	25.4124	4.57032
DALYs (Disability-Adjusted Life Years)	Haiti	Both	Age-standardized	Pancreatitis	Rate	1992	11.2146	21.8478	5.34425
DALYs (Disability-Adjusted Life Years)	Haiti	Both	Age-standardized	Pancreatitis	Rate	2021	9.65914	17.3119	4.56461
DALYs (Disability-Adjusted Life Years)	Democratic Republic of the Congo	Male	Age-standardized	Pancreatitis	Rate	1992	10.148	21.4696	4.5383
DALYs (Disability-Adjusted Life Years)	Democratic Republic of the Congo	Male	Age-standardized	Pancreatitis	Rate	2021	8.98849	17.5575	4.24099
DALYs (Disability-Adjusted Life Years)	Democratic Republic of the Congo	Female	Age-standardized	Pancreatitis	Rate	1992	1.78558	3.3822	0.869706
DALYs (Disability-Adjusted Life Years)	Democratic Republic of the Congo	Female	Age-standardized	Pancreatitis	Rate	2021	1.76333	3.45572	0.823376
DALYs (Disability-Adjusted Life Years)	Democratic Republic of the Congo	Both	Age-standardized	Pancreatitis	Rate	1992	6.006	11.7641	3.02613
DALYs (Disability-Adjusted Life Years)	Democratic Republic of the Congo	Both	Age-standardized	Pancreatitis	Rate	2021	5.43122	9.97558	2.80392
DALYs (Disability-Adjusted Life Years)	Guam	Male	Age-standardized	Pancreatitis	Rate	1992	4.59066	7.82481	2.58737
DALYs (Disability-Adjusted Life Years)	Guam	Male	Age-standardized	Pancreatitis	Rate	2021	4.23935	6.96881	2.32672
DALYs (Disability-Adjusted Life Years)	Guam	Female	Age-standardized	Pancreatitis	Rate	1992	3.44854	6.00245	1.60873
DALYs (Disability-Adjusted Life Years)	Guam	Female	Age-standardized	Pancreatitis	Rate	2021	0.794561	1.50687	0.431147
DALYs (Disability-Adjusted Life Years)	Guam	Both	Age-standardized	Pancreatitis	Rate	1992	4.18764	6.70674	2.56228
DALYs (Disability-Adjusted Life Years)	Guam	Both	Age-standardized	Pancreatitis	Rate	2021	2.61924	4.2313	1.50853
DALYs (Disability-Adjusted Life Years)	Qatar	Male	Age-standardized	Pancreatitis	Rate	1992	3.96736	6.6229	2.19585
DALYs (Disability-Adjusted Life Years)	Qatar	Male	Age-standardized	Pancreatitis	Rate	2021	2.96465	5.24763	1.62521
DALYs (Disability-Adjusted Life Years)	Qatar	Female	Age-standardized	Pancreatitis	Rate	1992	2.04741	3.31269	1.14941
DALYs (Disability-Adjusted Life Years)	Qatar	Female	Age-standardized	Pancreatitis	Rate	2021	1.2471	2.15461	0.675273
DALYs (Disability-Adjusted Life Years)	Qatar	Both	Age-standardized	Pancreatitis	Rate	1992	3.18353	4.96218	1.95001
DALYs (Disability-Adjusted Life Years)	Qatar	Both	Age-standardized	Pancreatitis	Rate	2021	2.29628	3.86528	1.34676
DALYs (Disability-Adjusted Life Years)	Paraguay	Male	Age-standardized	Pancreatitis	Rate	1992	8.46158	14.6612	4.40361
DALYs (Disability-Adjusted Life Years)	Paraguay	Male	Age-standardized	Pancreatitis	Rate	2021	6.88823	10.8882	4.01238
DALYs (Disability-Adjusted Life Years)	Paraguay	Female	Age-standardized	Pancreatitis	Rate	1992	10.6771	17.2266	6.15953
DALYs (Disability-Adjusted Life Years)	Paraguay	Female	Age-standardized	Pancreatitis	Rate	2021	8.85854	14.6077	4.99876
DALYs (Disability-Adjusted Life Years)	Paraguay	Both	Age-standardized	Pancreatitis	Rate	1992	9.56193	14.3639	6.01065
DALYs (Disability-Adjusted Life Years)	Paraguay	Both	Age-standardized	Pancreatitis	Rate	2021	7.85095	11.4708	5.23832
DALYs (Disability-Adjusted Life Years)	Somalia	Male	Age-standardized	Pancreatitis	Rate	1992	7.13343	15.9493	2.7999
DALYs (Disability-Adjusted Life Years)	Somalia	Male	Age-standardized	Pancreatitis	Rate	2021	6.77311	15.5976	2.5596
DALYs (Disability-Adjusted Life Years)	Somalia	Female	Age-standardized	Pancreatitis	Rate	1992	1.34462	2.87136	0.60633
DALYs (Disability-Adjusted Life Years)	Somalia	Female	Age-standardized	Pancreatitis	Rate	2021	1.37848	2.86017	0.63175
DALYs (Disability-Adjusted Life Years)	Somalia	Both	Age-standardized	Pancreatitis	Rate	1992	4.35212	9.04084	1.94114
DALYs (Disability-Adjusted Life Years)	Somalia	Both	Age-standardized	Pancreatitis	Rate	2021	4.19334	9.02206	1.83255
DALYs (Disability-Adjusted Life Years)	United States of America	Male	Age-standardized	Pancreatitis	Rate	1992	4.10148	4.70285	3.68791
DALYs (Disability-Adjusted Life Years)	United States of America	Male	Age-standardized	Pancreatitis	Rate	2021	4.21251	4.8033	3.77581
DALYs (Disability-Adjusted Life Years)	United States of America	Female	Age-standardized	Pancreatitis	Rate	1992	3.67022	4.44207	3.14788
DALYs (Disability-Adjusted Life Years)	United States of America	Female	Age-standardized	Pancreatitis	Rate	2021	3.07814	3.82935	2.59139
DALYs (Disability-Adjusted Life Years)	United States of America	Both	Age-standardized	Pancreatitis	Rate	1992	3.8905	4.58193	3.44768
DALYs (Disability-Adjusted Life Years)	United States of America	Both	Age-standardized	Pancreatitis	Rate	2021	3.65656	4.31458	3.21408
DALYs (Disability-Adjusted Life Years)	Chile	Male	Age-standardized	Pancreatitis	Rate	1992	5.256	6.63373	4.23058
DALYs (Disability-Adjusted Life Years)	Chile	Male	Age-standardized	Pancreatitis	Rate	2021	4.44402	5.63267	3.50031
DALYs (Disability-Adjusted Life Years)	Chile	Female	Age-standardized	Pancreatitis	Rate	1992	8.42994	10.2506	6.78175
DALYs (Disability-Adjusted Life Years)	Chile	Female	Age-standardized	Pancreatitis	Rate	2021	4.672	5.7275	3.78003
DALYs (Disability-Adjusted Life Years)	Chile	Both	Age-standardized	Pancreatitis	Rate	1992	6.83969	7.96569	5.7778
DALYs (Disability-Adjusted Life Years)	Chile	Both	Age-standardized	Pancreatitis	Rate	2021	4.55494	5.37565	3.81668
DALYs (Disability-Adjusted Life Years)	Mozambique	Male	Age-standardized	Pancreatitis	Rate	1992	9.86814	20.4539	3.69332
DALYs (Disability-Adjusted Life Years)	Mozambique	Male	Age-standardized	Pancreatitis	Rate	2021	13.2017	25.2093	6.45582
DALYs (Disability-Adjusted Life Years)	Mozambique	Female	Age-standardized	Pancreatitis	Rate	1992	1.36034	2.67881	0.654678
DALYs (Disability-Adjusted Life Years)	Mozambique	Female	Age-standardized	Pancreatitis	Rate	2021	1.66577	3.33667	0.770492
DALYs (Disability-Adjusted Life Years)	Mozambique	Both	Age-standardized	Pancreatitis	Rate	1992	5.16977	10.1803	2.21275
DALYs (Disability-Adjusted Life Years)	Mozambique	Both	Age-standardized	Pancreatitis	Rate	2021	7.03653	12.8044	3.68645
DALYs (Disability-Adjusted Life Years)	Central African Republic	Male	Age-standardized	Pancreatitis	Rate	1992	11.0174	21.9291	4.61404
DALYs (Disability-Adjusted Life Years)	Central African Republic	Male	Age-standardized	Pancreatitis	Rate	2021	10.1347	19.5675	4.16492
DALYs (Disability-Adjusted Life Years)	Central African Republic	Female	Age-standardized	Pancreatitis	Rate	1992	1.62874	3.3382	0.728874
DALYs (Disability-Adjusted Life Years)	Central African Republic	Female	Age-standardized	Pancreatitis	Rate	2021	1.95936	3.81837	0.88155
DALYs (Disability-Adjusted Life Years)	Central African Republic	Both	Age-standardized	Pancreatitis	Rate	1992	6.20413	11.6604	2.8437
DALYs (Disability-Adjusted Life Years)	Central African Republic	Both	Age-standardized	Pancreatitis	Rate	2021	5.91313	10.8125	2.81288
DALYs (Disability-Adjusted Life Years)	Monaco	Male	Age-standardized	Pancreatitis	Rate	1992	1.95205	3.28271	1.02561
DALYs (Disability-Adjusted Life Years)	Monaco	Male	Age-standardized	Pancreatitis	Rate	2021	1.67922	2.94718	0.90409
DALYs (Disability-Adjusted Life Years)	Monaco	Female	Age-standardized	Pancreatitis	Rate	1992	3.1755	5.9821	1.53892
DALYs (Disability-Adjusted Life Years)	Monaco	Female	Age-standardized	Pancreatitis	Rate	2021	2.6779	4.89559	1.37468
DALYs (Disability-Adjusted Life Years)	Monaco	Both	Age-standardized	Pancreatitis	Rate	1992	2.5394	4.14028	1.46554
DALYs (Disability-Adjusted Life Years)	Monaco	Both	Age-standardized	Pancreatitis	Rate	2021	2.1694	3.40347	1.33239
DALYs (Disability-Adjusted Life Years)	Libya	Male	Age-standardized	Pancreatitis	Rate	1992	2.96446	5.65099	1.41045
DALYs (Disability-Adjusted Life Years)	Libya	Male	Age-standardized	Pancreatitis	Rate	2021	3.32061	6.07462	1.72072
DALYs (Disability-Adjusted Life Years)	Libya	Female	Age-standardized	Pancreatitis	Rate	1992	2.33338	4.57347	1.11795
DALYs (Disability-Adjusted Life Years)	Libya	Female	Age-standardized	Pancreatitis	Rate	2021	2.71404	5.27402	1.32936
DALYs (Disability-Adjusted Life Years)	Libya	Both	Age-standardized	Pancreatitis	Rate	1992	2.65048	4.59593	1.44405
DALYs (Disability-Adjusted Life Years)	Libya	Both	Age-standardized	Pancreatitis	Rate	2021	3.02306	4.94458	1.75683
DALYs (Disability-Adjusted Life Years)	Cabo Verde	Male	Age-standardized	Pancreatitis	Rate	1992	9.78213	20.7701	4.36468
DALYs (Disability-Adjusted Life Years)	Cabo Verde	Male	Age-standardized	Pancreatitis	Rate	2021	9.65266	17.485	4.47312
DALYs (Disability-Adjusted Life Years)	Cabo Verde	Female	Age-standardized	Pancreatitis	Rate	1992	1.65917	2.75942	0.868114
DALYs (Disability-Adjusted Life Years)	Cabo Verde	Female	Age-standardized	Pancreatitis	Rate	2021	1.31421	2.16778	0.731224
DALYs (Disability-Adjusted Life Years)	Cabo Verde	Both	Age-standardized	Pancreatitis	Rate	1992	5.68844	11.3165	2.78212
DALYs (Disability-Adjusted Life Years)	Cabo Verde	Both	Age-standardized	Pancreatitis	Rate	2021	5.54473	9.60253	2.7848
DALYs (Disability-Adjusted Life Years)	Australia	Male	Age-standardized	Pancreatitis	Rate	1992	1.99128	2.58154	1.53302
DALYs (Disability-Adjusted Life Years)	Australia	Male	Age-standardized	Pancreatitis	Rate	2021	1.42207	1.96411	1.05213
DALYs (Disability-Adjusted Life Years)	Australia	Female	Age-standardized	Pancreatitis	Rate	1992	1.86165	2.54036	1.35124
DALYs (Disability-Adjusted Life Years)	Australia	Female	Age-standardized	Pancreatitis	Rate	2021	1.29049	1.92036	0.856298
DALYs (Disability-Adjusted Life Years)	Australia	Both	Age-standardized	Pancreatitis	Rate	1992	1.92573	2.4681	1.5032
DALYs (Disability-Adjusted Life Years)	Australia	Both	Age-standardized	Pancreatitis	Rate	2021	1.35749	1.90614	0.97493
DALYs (Disability-Adjusted Life Years)	Mongolia	Male	Age-standardized	Pancreatitis	Rate	1992	21.8477	42.7469	10.4009
DALYs (Disability-Adjusted Life Years)	Mongolia	Male	Age-standardized	Pancreatitis	Rate	2021	13.341	21.5103	7.63867
DALYs (Disability-Adjusted Life Years)	Mongolia	Female	Age-standardized	Pancreatitis	Rate	1992	18.9898	43.5404	5.65861
DALYs (Disability-Adjusted Life Years)	Mongolia	Female	Age-standardized	Pancreatitis	Rate	2021	7.0707	11.4849	4.13795
DALYs (Disability-Adjusted Life Years)	Mongolia	Both	Age-standardized	Pancreatitis	Rate	1992	20.4052	38.0076	9.59448
DALYs (Disability-Adjusted Life Years)	Mongolia	Both	Age-standardized	Pancreatitis	Rate	2021	10.2359	15.7442	6.54353
DALYs (Disability-Adjusted Life Years)	Nauru	Male	Age-standardized	Pancreatitis	Rate	1992	19.9774	38.7168	8.2806
DALYs (Disability-Adjusted Life Years)	Nauru	Male	Age-standardized	Pancreatitis	Rate	2021	16.6241	34.2296	5.56112
DALYs (Disability-Adjusted Life Years)	Nauru	Female	Age-standardized	Pancreatitis	Rate	1992	11.6525	21.6949	4.94953
DALYs (Disability-Adjusted Life Years)	Nauru	Female	Age-standardized	Pancreatitis	Rate	2021	9.98175	19.7544	4.31076
DALYs (Disability-Adjusted Life Years)	Nauru	Both	Age-standardized	Pancreatitis	Rate	1992	15.7836	28.2067	7.6782
DALYs (Disability-Adjusted Life Years)	Nauru	Both	Age-standardized	Pancreatitis	Rate	2021	13.3241	25.29	5.77284
DALYs (Disability-Adjusted Life Years)	Bahrain	Male	Age-standardized	Pancreatitis	Rate	1992	3.48439	5.47976	2.0811
DALYs (Disability-Adjusted Life Years)	Bahrain	Male	Age-standardized	Pancreatitis	Rate	2021	2.63525	4.12981	1.58633
DALYs (Disability-Adjusted Life Years)	Bahrain	Female	Age-standardized	Pancreatitis	Rate	1992	2.99342	4.73511	1.78161
DALYs (Disability-Adjusted Life Years)	Bahrain	Female	Age-standardized	Pancreatitis	Rate	2021	2.38349	3.66297	1.37064
DALYs (Disability-Adjusted Life Years)	Bahrain	Both	Age-standardized	Pancreatitis	Rate	1992	3.24917	4.66003	2.20154
DALYs (Disability-Adjusted Life Years)	Bahrain	Both	Age-standardized	Pancreatitis	Rate	2021	2.52002	3.59168	1.65647
DALYs (Disability-Adjusted Life Years)	Cambodia	Male	Age-standardized	Pancreatitis	Rate	1992	14.0898	28.6322	6.22315
DALYs (Disability-Adjusted Life Years)	Cambodia	Male	Age-standardized	Pancreatitis	Rate	2021	11.6333	22.568	5.26282
DALYs (Disability-Adjusted Life Years)	Cambodia	Female	Age-standardized	Pancreatitis	Rate	1992	6.54386	15.217	2.11607
DALYs (Disability-Adjusted Life Years)	Cambodia	Female	Age-standardized	Pancreatitis	Rate	2021	4.3913	9.52642	1.94131
DALYs (Disability-Adjusted Life Years)	Cambodia	Both	Age-standardized	Pancreatitis	Rate	1992	10.1504	19.883	5.12289
DALYs (Disability-Adjusted Life Years)	Cambodia	Both	Age-standardized	Pancreatitis	Rate	2021	8.0771	14.892	4.11522
DALYs (Disability-Adjusted Life Years)	Congo	Male	Age-standardized	Pancreatitis	Rate	1992	9.14795	18.1012	3.77837
DALYs (Disability-Adjusted Life Years)	Congo	Male	Age-standardized	Pancreatitis	Rate	2021	9.39214	17.6526	4.44771
DALYs (Disability-Adjusted Life Years)	Congo	Female	Age-standardized	Pancreatitis	Rate	1992	1.3952	2.7974	0.626343
DALYs (Disability-Adjusted Life Years)	Congo	Female	Age-standardized	Pancreatitis	Rate	2021	1.81083	3.37004	0.931606
DALYs (Disability-Adjusted Life Years)	Congo	Both	Age-standardized	Pancreatitis	Rate	1992	5.23435	9.9355	2.36582
DALYs (Disability-Adjusted Life Years)	Congo	Both	Age-standardized	Pancreatitis	Rate	2021	5.53382	9.66423	2.9647
DALYs (Disability-Adjusted Life Years)	Belarus	Male	Age-standardized	Pancreatitis	Rate	1992	20.6881	29.759	11.5105
DALYs (Disability-Adjusted Life Years)	Belarus	Male	Age-standardized	Pancreatitis	Rate	2021	14.4628	20.8878	9.86952
DALYs (Disability-Adjusted Life Years)	Belarus	Female	Age-standardized	Pancreatitis	Rate	1992	11.6422	16.0443	6.99976
DALYs (Disability-Adjusted Life Years)	Belarus	Female	Age-standardized	Pancreatitis	Rate	2021	7.42792	11.068	4.97383
DALYs (Disability-Adjusted Life Years)	Belarus	Both	Age-standardized	Pancreatitis	Rate	1992	16.1343	22.2915	9.92787
DALYs (Disability-Adjusted Life Years)	Belarus	Both	Age-standardized	Pancreatitis	Rate	2021	11.052	15.7743	7.76129
DALYs (Disability-Adjusted Life Years)	Marshall Islands	Male	Age-standardized	Pancreatitis	Rate	1992	24.8157	55.4628	8.02056
DALYs (Disability-Adjusted Life Years)	Marshall Islands	Male	Age-standardized	Pancreatitis	Rate	2021	16.5039	30.753	7.32066
DALYs (Disability-Adjusted Life Years)	Marshall Islands	Female	Age-standardized	Pancreatitis	Rate	1992	9.69752	20.0242	3.88059
DALYs (Disability-Adjusted Life Years)	Marshall Islands	Female	Age-standardized	Pancreatitis	Rate	2021	8.59656	18.9933	3.41429
DALYs (Disability-Adjusted Life Years)	Marshall Islands	Both	Age-standardized	Pancreatitis	Rate	1992	17.2412	35.1687	7.17869
DALYs (Disability-Adjusted Life Years)	Marshall Islands	Both	Age-standardized	Pancreatitis	Rate	2021	12.6147	22.8627	6.16217
DALYs (Disability-Adjusted Life Years)	Turkey	Male	Age-standardized	Pancreatitis	Rate	1992	4.37298	7.55444	2.17454
DALYs (Disability-Adjusted Life Years)	Turkey	Male	Age-standardized	Pancreatitis	Rate	2021	2.5879	4.06809	1.48581
DALYs (Disability-Adjusted Life Years)	Turkey	Female	Age-standardized	Pancreatitis	Rate	1992	4.5437	8.37912	2.10115
DALYs (Disability-Adjusted Life Years)	Turkey	Female	Age-standardized	Pancreatitis	Rate	2021	2.31002	3.67833	1.33401
DALYs (Disability-Adjusted Life Years)	Turkey	Both	Age-standardized	Pancreatitis	Rate	1992	4.45515	7.07557	2.51461
DALYs (Disability-Adjusted Life Years)	Turkey	Both	Age-standardized	Pancreatitis	Rate	2021	2.45244	3.57186	1.59555
DALYs (Disability-Adjusted Life Years)	India	Male	Age-standardized	Pancreatitis	Rate	1992	19.2051	31.3582	12.6165
DALYs (Disability-Adjusted Life Years)	India	Male	Age-standardized	Pancreatitis	Rate	2021	10.9409	15.4912	7.1081
DALYs (Disability-Adjusted Life Years)	India	Female	Age-standardized	Pancreatitis	Rate	1992	10.1725	19.9165	5.40092
DALYs (Disability-Adjusted Life Years)	India	Female	Age-standardized	Pancreatitis	Rate	2021	6.21072	10.0891	3.47927
DALYs (Disability-Adjusted Life Years)	India	Both	Age-standardized	Pancreatitis	Rate	1992	14.8494	23.6863	10.5745
DALYs (Disability-Adjusted Life Years)	India	Both	Age-standardized	Pancreatitis	Rate	2021	8.65742	11.8081	5.74015
DALYs (Disability-Adjusted Life Years)	Ecuador	Male	Age-standardized	Pancreatitis	Rate	1992	30.4886	38.2796	23.9779
DALYs (Disability-Adjusted Life Years)	Ecuador	Male	Age-standardized	Pancreatitis	Rate	2021	12.2291	16.2512	8.85497
DALYs (Disability-Adjusted Life Years)	Ecuador	Female	Age-standardized	Pancreatitis	Rate	1992	26.9222	33.5613	21.4423
DALYs (Disability-Adjusted Life Years)	Ecuador	Female	Age-standardized	Pancreatitis	Rate	2021	9.17671	12.0455	6.81585
DALYs (Disability-Adjusted Life Years)	Ecuador	Both	Age-standardized	Pancreatitis	Rate	1992	28.649	33.9335	24.1158
DALYs (Disability-Adjusted Life Years)	Ecuador	Both	Age-standardized	Pancreatitis	Rate	2021	10.7188	13.4329	8.25536
DALYs (Disability-Adjusted Life Years)	Benin	Male	Age-standardized	Pancreatitis	Rate	1992	13.5285	25.9635	6.41118
DALYs (Disability-Adjusted Life Years)	Benin	Male	Age-standardized	Pancreatitis	Rate	2021	11.9829	22.3622	5.39855
DALYs (Disability-Adjusted Life Years)	Benin	Female	Age-standardized	Pancreatitis	Rate	1992	2.29513	4.82871	0.973309
DALYs (Disability-Adjusted Life Years)	Benin	Female	Age-standardized	Pancreatitis	Rate	2021	2.6567	5.21167	1.15913
DALYs (Disability-Adjusted Life Years)	Benin	Both	Age-standardized	Pancreatitis	Rate	1992	7.50315	13.5332	3.87111
DALYs (Disability-Adjusted Life Years)	Benin	Both	Age-standardized	Pancreatitis	Rate	2021	7.16637	12.5164	3.64438
DALYs (Disability-Adjusted Life Years)	Burundi	Male	Age-standardized	Pancreatitis	Rate	1992	7.93992	17.7002	3.19272
DALYs (Disability-Adjusted Life Years)	Burundi	Male	Age-standardized	Pancreatitis	Rate	2021	6.09704	12.9429	2.44866
DALYs (Disability-Adjusted Life Years)	Burundi	Female	Age-standardized	Pancreatitis	Rate	1992	1.94262	3.80482	0.915208
DALYs (Disability-Adjusted Life Years)	Burundi	Female	Age-standardized	Pancreatitis	Rate	2021	1.79755	3.51365	0.828031
DALYs (Disability-Adjusted Life Years)	Burundi	Both	Age-standardized	Pancreatitis	Rate	1992	4.85198	9.77502	2.33453
DALYs (Disability-Adjusted Life Years)	Burundi	Both	Age-standardized	Pancreatitis	Rate	2021	3.8795	7.28638	1.93477
DALYs (Disability-Adjusted Life Years)	Barbados	Male	Age-standardized	Pancreatitis	Rate	1992	7.09952	9.12004	5.47916
DALYs (Disability-Adjusted Life Years)	Barbados	Male	Age-standardized	Pancreatitis	Rate	2021	4.17196	5.97093	2.69146
DALYs (Disability-Adjusted Life Years)	Barbados	Female	Age-standardized	Pancreatitis	Rate	1992	6.34155	8.00943	4.74143
DALYs (Disability-Adjusted Life Years)	Barbados	Female	Age-standardized	Pancreatitis	Rate	2021	4.55002	6.11021	3.28412
DALYs (Disability-Adjusted Life Years)	Barbados	Both	Age-standardized	Pancreatitis	Rate	1992	6.72397	8.14418	5.50191
DALYs (Disability-Adjusted Life Years)	Barbados	Both	Age-standardized	Pancreatitis	Rate	2021	4.35832	5.83981	3.15236
DALYs (Disability-Adjusted Life Years)	Albania	Male	Age-standardized	Pancreatitis	Rate	1992	5.36547	8.73498	2.93903
DALYs (Disability-Adjusted Life Years)	Albania	Male	Age-standardized	Pancreatitis	Rate	2021	2.86309	5.06483	1.53746
DALYs (Disability-Adjusted Life Years)	Albania	Female	Age-standardized	Pancreatitis	Rate	1992	3.46594	5.61646	1.77581
DALYs (Disability-Adjusted Life Years)	Albania	Female	Age-standardized	Pancreatitis	Rate	2021	1.74983	3.019	0.927974
DALYs (Disability-Adjusted Life Years)	Albania	Both	Age-standardized	Pancreatitis	Rate	1992	4.40022	6.49799	2.78413
DALYs (Disability-Adjusted Life Years)	Albania	Both	Age-standardized	Pancreatitis	Rate	2021	2.33726	3.86198	1.38728
DALYs (Disability-Adjusted Life Years)	Guinea-Bissau	Male	Age-standardized	Pancreatitis	Rate	1992	17.3626	36.1317	5.92184
DALYs (Disability-Adjusted Life Years)	Guinea-Bissau	Male	Age-standardized	Pancreatitis	Rate	2021	17.4241	34.4371	6.47675
DALYs (Disability-Adjusted Life Years)	Guinea-Bissau	Female	Age-standardized	Pancreatitis	Rate	1992	2.58466	5.74695	0.942581
DALYs (Disability-Adjusted Life Years)	Guinea-Bissau	Female	Age-standardized	Pancreatitis	Rate	2021	2.93324	5.89608	1.23051
DALYs (Disability-Adjusted Life Years)	Guinea-Bissau	Both	Age-standardized	Pancreatitis	Rate	1992	9.72089	19.4319	3.50656
DALYs (Disability-Adjusted Life Years)	Guinea-Bissau	Both	Age-standardized	Pancreatitis	Rate	2021	10.0633	19.0932	4.1418
DALYs (Disability-Adjusted Life Years)	Belize	Male	Age-standardized	Pancreatitis	Rate	1992	6.91791	10.5106	4.59955
DALYs (Disability-Adjusted Life Years)	Belize	Male	Age-standardized	Pancreatitis	Rate	2021	5.54822	7.38603	4.17154
DALYs (Disability-Adjusted Life Years)	Belize	Female	Age-standardized	Pancreatitis	Rate	1992	4.06836	5.4312	2.92048
DALYs (Disability-Adjusted Life Years)	Belize	Female	Age-standardized	Pancreatitis	Rate	2021	2.59702	3.41062	1.90572
DALYs (Disability-Adjusted Life Years)	Belize	Both	Age-standardized	Pancreatitis	Rate	1992	5.49148	7.55366	4.006
DALYs (Disability-Adjusted Life Years)	Belize	Both	Age-standardized	Pancreatitis	Rate	2021	4.0549	5.17242	3.16727
DALYs (Disability-Adjusted Life Years)	Belgium	Male	Age-standardized	Pancreatitis	Rate	1992	3.07086	3.82498	2.45305
DALYs (Disability-Adjusted Life Years)	Belgium	Male	Age-standardized	Pancreatitis	Rate	2021	1.53524	1.97895	1.13115
DALYs (Disability-Adjusted Life Years)	Belgium	Female	Age-standardized	Pancreatitis	Rate	1992	2.9498	4.02658	2.19303
DALYs (Disability-Adjusted Life Years)	Belgium	Female	Age-standardized	Pancreatitis	Rate	2021	2.04223	3.01398	1.40911
DALYs (Disability-Adjusted Life Years)	Belgium	Both	Age-standardized	Pancreatitis	Rate	1992	3.01093	3.7555	2.44735
DALYs (Disability-Adjusted Life Years)	Belgium	Both	Age-standardized	Pancreatitis	Rate	2021	1.7834	2.41581	1.33708
DALYs (Disability-Adjusted Life Years)	Norway	Male	Age-standardized	Pancreatitis	Rate	1992	1.83205	2.55854	1.36923
DALYs (Disability-Adjusted Life Years)	Norway	Male	Age-standardized	Pancreatitis	Rate	2021	1.3551	1.87761	0.991707
DALYs (Disability-Adjusted Life Years)	Norway	Female	Age-standardized	Pancreatitis	Rate	1992	1.50257	2.20373	1.0744
DALYs (Disability-Adjusted Life Years)	Norway	Female	Age-standardized	Pancreatitis	Rate	2021	1.30455	1.78709	0.980638
DALYs (Disability-Adjusted Life Years)	Norway	Both	Age-standardized	Pancreatitis	Rate	1992	1.67067	2.38318	1.23069
DALYs (Disability-Adjusted Life Years)	Norway	Both	Age-standardized	Pancreatitis	Rate	2021	1.33194	1.82898	1.0073
DALYs (Disability-Adjusted Life Years)	Kuwait	Male	Age-standardized	Pancreatitis	Rate	1992	3.02809	4.05381	2.21495
DALYs (Disability-Adjusted Life Years)	Kuwait	Male	Age-standardized	Pancreatitis	Rate	2021	2.85866	4.04695	2.01173
DALYs (Disability-Adjusted Life Years)	Kuwait	Female	Age-standardized	Pancreatitis	Rate	1992	3.09218	4.11086	2.32005
DALYs (Disability-Adjusted Life Years)	Kuwait	Female	Age-standardized	Pancreatitis	Rate	2021	1.91018	2.72116	1.30238
DALYs (Disability-Adjusted Life Years)	Kuwait	Both	Age-standardized	Pancreatitis	Rate	1992	3.05728	3.9505	2.3808
DALYs (Disability-Adjusted Life Years)	Kuwait	Both	Age-standardized	Pancreatitis	Rate	2021	2.39671	3.30589	1.73081
DALYs (Disability-Adjusted Life Years)	United Republic of Tanzania	Male	Age-standardized	Pancreatitis	Rate	1992	6.31545	12.368	2.81369
DALYs (Disability-Adjusted Life Years)	United Republic of Tanzania	Male	Age-standardized	Pancreatitis	Rate	2021	7.24435	14.048	3.02844
DALYs (Disability-Adjusted Life Years)	United Republic of Tanzania	Female	Age-standardized	Pancreatitis	Rate	1992	1.48042	2.67274	0.771418
DALYs (Disability-Adjusted Life Years)	United Republic of Tanzania	Female	Age-standardized	Pancreatitis	Rate	2021	1.86845	3.65593	0.854289
DALYs (Disability-Adjusted Life Years)	United Republic of Tanzania	Both	Age-standardized	Pancreatitis	Rate	1992	3.7602	6.78046	1.93028
DALYs (Disability-Adjusted Life Years)	United Republic of Tanzania	Both	Age-standardized	Pancreatitis	Rate	2021	4.43154	7.91005	2.16738
DALYs (Disability-Adjusted Life Years)	Cuba	Male	Age-standardized	Pancreatitis	Rate	1992	5.22696	6.63527	3.91404
DALYs (Disability-Adjusted Life Years)	Cuba	Male	Age-standardized	Pancreatitis	Rate	2021	3.9827	5.22628	3.01866
DALYs (Disability-Adjusted Life Years)	Cuba	Female	Age-standardized	Pancreatitis	Rate	1992	6.0047	7.60272	4.26356
DALYs (Disability-Adjusted Life Years)	Cuba	Female	Age-standardized	Pancreatitis	Rate	2021	3.89038	5.03778	2.89722
DALYs (Disability-Adjusted Life Years)	Cuba	Both	Age-standardized	Pancreatitis	Rate	1992	5.60803	6.81961	4.35798
DALYs (Disability-Adjusted Life Years)	Cuba	Both	Age-standardized	Pancreatitis	Rate	2021	3.93795	4.90002	3.14165
DALYs (Disability-Adjusted Life Years)	Peru	Male	Age-standardized	Pancreatitis	Rate	1992	29.5178	49.4204	15.8984
DALYs (Disability-Adjusted Life Years)	Peru	Male	Age-standardized	Pancreatitis	Rate	2021	15.2357	26.2478	8.26494
DALYs (Disability-Adjusted Life Years)	Peru	Female	Age-standardized	Pancreatitis	Rate	1992	30.8823	53.3092	14.4471
DALYs (Disability-Adjusted Life Years)	Peru	Female	Age-standardized	Pancreatitis	Rate	2021	12.7749	21.7938	6.90466
DALYs (Disability-Adjusted Life Years)	Peru	Both	Age-standardized	Pancreatitis	Rate	1992	30.1593	46.1454	18.1191
DALYs (Disability-Adjusted Life Years)	Peru	Both	Age-standardized	Pancreatitis	Rate	2021	14.0468	21.3592	8.77692
DALYs (Disability-Adjusted Life Years)	Botswana	Male	Age-standardized	Pancreatitis	Rate	1992	9.7119	23.71	3.62782
DALYs (Disability-Adjusted Life Years)	Botswana	Male	Age-standardized	Pancreatitis	Rate	2021	5.2133	10.7501	2.31616
DALYs (Disability-Adjusted Life Years)	Botswana	Female	Age-standardized	Pancreatitis	Rate	1992	1.36397	2.9146	0.531029
DALYs (Disability-Adjusted Life Years)	Botswana	Female	Age-standardized	Pancreatitis	Rate	2021	1.15953	2.19455	0.562412
DALYs (Disability-Adjusted Life Years)	Botswana	Both	Age-standardized	Pancreatitis	Rate	1992	5.30486	12.1186	2.20247
DALYs (Disability-Adjusted Life Years)	Botswana	Both	Age-standardized	Pancreatitis	Rate	2021	3.18456	6.07618	1.57026
DALYs (Disability-Adjusted Life Years)	Sudan	Male	Age-standardized	Pancreatitis	Rate	1992	3.10869	6.3008	1.36345
DALYs (Disability-Adjusted Life Years)	Sudan	Male	Age-standardized	Pancreatitis	Rate	2021	3.36329	7.3343	1.56453
DALYs (Disability-Adjusted Life Years)	Sudan	Female	Age-standardized	Pancreatitis	Rate	1992	3.05036	7.01641	1.18433
DALYs (Disability-Adjusted Life Years)	Sudan	Female	Age-standardized	Pancreatitis	Rate	2021	3.27443	6.78137	1.40832
DALYs (Disability-Adjusted Life Years)	Sudan	Both	Age-standardized	Pancreatitis	Rate	1992	3.07534	5.65162	1.56775
DALYs (Disability-Adjusted Life Years)	Sudan	Both	Age-standardized	Pancreatitis	Rate	2021	3.32061	6.23212	1.74904
DALYs (Disability-Adjusted Life Years)	Egypt	Male	Age-standardized	Pancreatitis	Rate	1992	1.79267	3.17631	0.95457
DALYs (Disability-Adjusted Life Years)	Egypt	Male	Age-standardized	Pancreatitis	Rate	2021	1.72198	2.78817	1.0011
DALYs (Disability-Adjusted Life Years)	Egypt	Female	Age-standardized	Pancreatitis	Rate	1992	2.09474	3.73147	1.01235
DALYs (Disability-Adjusted Life Years)	Egypt	Female	Age-standardized	Pancreatitis	Rate	2021	1.69163	2.82295	0.953978
DALYs (Disability-Adjusted Life Years)	Egypt	Both	Age-standardized	Pancreatitis	Rate	1992	1.93945	3.15451	1.09545
DALYs (Disability-Adjusted Life Years)	Egypt	Both	Age-standardized	Pancreatitis	Rate	2021	1.70755	2.64528	1.05968
DALYs (Disability-Adjusted Life Years)	Guinea	Male	Age-standardized	Pancreatitis	Rate	1992	12.0457	25.8776	5.26817
DALYs (Disability-Adjusted Life Years)	Guinea	Male	Age-standardized	Pancreatitis	Rate	2021	11.6165	21.8419	5.59091
DALYs (Disability-Adjusted Life Years)	Guinea	Female	Age-standardized	Pancreatitis	Rate	1992	2.07074	4.49008	0.766182
DALYs (Disability-Adjusted Life Years)	Guinea	Female	Age-standardized	Pancreatitis	Rate	2021	2.39751	4.62091	1.06345
DALYs (Disability-Adjusted Life Years)	Guinea	Both	Age-standardized	Pancreatitis	Rate	1992	6.82764	13.7061	3.30017
DALYs (Disability-Adjusted Life Years)	Guinea	Both	Age-standardized	Pancreatitis	Rate	2021	6.773	12.0658	3.52564
DALYs (Disability-Adjusted Life Years)	Chad	Male	Age-standardized	Pancreatitis	Rate	1992	9.63249	19.4417	4.2328
DALYs (Disability-Adjusted Life Years)	Chad	Male	Age-standardized	Pancreatitis	Rate	2021	12.624	24.4948	6.00063
DALYs (Disability-Adjusted Life Years)	Chad	Female	Age-standardized	Pancreatitis	Rate	1992	1.81335	3.89695	0.76901
DALYs (Disability-Adjusted Life Years)	Chad	Female	Age-standardized	Pancreatitis	Rate	2021	2.46072	4.89396	1.09614
DALYs (Disability-Adjusted Life Years)	Chad	Both	Age-standardized	Pancreatitis	Rate	1992	5.55181	10.6268	2.7567
DALYs (Disability-Adjusted Life Years)	Chad	Both	Age-standardized	Pancreatitis	Rate	2021	7.41071	13.7393	3.84926
DALYs (Disability-Adjusted Life Years)	Saint Kitts and Nevis	Male	Age-standardized	Pancreatitis	Rate	1992	9.7963	13.6866	7.25169
DALYs (Disability-Adjusted Life Years)	Saint Kitts and Nevis	Male	Age-standardized	Pancreatitis	Rate	2021	11.4188	20.9993	7.02491
DALYs (Disability-Adjusted Life Years)	Saint Kitts and Nevis	Female	Age-standardized	Pancreatitis	Rate	1992	5.42695	7.05753	3.99639
DALYs (Disability-Adjusted Life Years)	Saint Kitts and Nevis	Female	Age-standardized	Pancreatitis	Rate	2021	3.41432	4.507	2.49522
DALYs (Disability-Adjusted Life Years)	Saint Kitts and Nevis	Both	Age-standardized	Pancreatitis	Rate	1992	7.61708	9.64018	6.10604
DALYs (Disability-Adjusted Life Years)	Saint Kitts and Nevis	Both	Age-standardized	Pancreatitis	Rate	2021	7.40779	12.2414	4.96822
DALYs (Disability-Adjusted Life Years)	Puerto Rico	Male	Age-standardized	Pancreatitis	Rate	1992	12.8881	16.2191	10.0051
DALYs (Disability-Adjusted Life Years)	Puerto Rico	Male	Age-standardized	Pancreatitis	Rate	2021	5.09165	6.88529	3.39015
DALYs (Disability-Adjusted Life Years)	Puerto Rico	Female	Age-standardized	Pancreatitis	Rate	1992	11.6512	14.6419	9.0509
DALYs (Disability-Adjusted Life Years)	Puerto Rico	Female	Age-standardized	Pancreatitis	Rate	2021	4.61515	6.18369	3.27903
DALYs (Disability-Adjusted Life Years)	Puerto Rico	Both	Age-standardized	Pancreatitis	Rate	1992	12.2672	14.5933	10.1757
DALYs (Disability-Adjusted Life Years)	Puerto Rico	Both	Age-standardized	Pancreatitis	Rate	2021	4.85466	6.34996	3.46924
DALYs (Disability-Adjusted Life Years)	Republic of Moldova	Male	Age-standardized	Pancreatitis	Rate	1992	36.7636	46.9133	28.7086
DALYs (Disability-Adjusted Life Years)	Republic of Moldova	Male	Age-standardized	Pancreatitis	Rate	2021	29.8616	38.4892	22.3952
DALYs (Disability-Adjusted Life Years)	Republic of Moldova	Female	Age-standardized	Pancreatitis	Rate	1992	14.1153	18.5412	10.7754
DALYs (Disability-Adjusted Life Years)	Republic of Moldova	Female	Age-standardized	Pancreatitis	Rate	2021	11.7695	15.7555	8.76434
DALYs (Disability-Adjusted Life Years)	Republic of Moldova	Both	Age-standardized	Pancreatitis	Rate	1992	25.4423	31.8612	20.4074
DALYs (Disability-Adjusted Life Years)	Republic of Moldova	Both	Age-standardized	Pancreatitis	Rate	2021	21.0515	26.5775	16.3121
DALYs (Disability-Adjusted Life Years)	Coted'Ivoire	Male	Age-standardized	Pancreatitis	Rate	1992	11.8728	21.9217	5.45842
DALYs (Disability-Adjusted Life Years)	Coted'Ivoire	Male	Age-standardized	Pancreatitis	Rate	2021	12.0599	22.2511	5.40138
DALYs (Disability-Adjusted Life Years)	Coted'Ivoire	Female	Age-standardized	Pancreatitis	Rate	1992	1.82622	3.57344	0.814392
DALYs (Disability-Adjusted Life Years)	Coted'Ivoire	Female	Age-standardized	Pancreatitis	Rate	2021	2.50369	4.52446	1.15901
DALYs (Disability-Adjusted Life Years)	Coted'Ivoire	Both	Age-standardized	Pancreatitis	Rate	1992	6.79207	12.0412	3.31724
DALYs (Disability-Adjusted Life Years)	Coted'Ivoire	Both	Age-standardized	Pancreatitis	Rate	2021	7.40166	12.9044	3.73104
DALYs (Disability-Adjusted Life Years)	Tonga	Male	Age-standardized	Pancreatitis	Rate	1992	17.0276	38.2221	4.81452
DALYs (Disability-Adjusted Life Years)	Tonga	Male	Age-standardized	Pancreatitis	Rate	2021	19.8128	36.6251	9.24681
DALYs (Disability-Adjusted Life Years)	Tonga	Female	Age-standardized	Pancreatitis	Rate	1992	8.72617	18.2333	3.73748
DALYs (Disability-Adjusted Life Years)	Tonga	Female	Age-standardized	Pancreatitis	Rate	2021	8.77063	17.7484	4.01974
DALYs (Disability-Adjusted Life Years)	Tonga	Both	Age-standardized	Pancreatitis	Rate	1992	12.9658	26.3082	5.12586
DALYs (Disability-Adjusted Life Years)	Tonga	Both	Age-standardized	Pancreatitis	Rate	2021	14.2386	25.497	7.29582
DALYs (Disability-Adjusted Life Years)	Russian Federation	Male	Age-standardized	Pancreatitis	Rate	1992	21.0386	28.5469	16.8095
DALYs (Disability-Adjusted Life Years)	Russian Federation	Male	Age-standardized	Pancreatitis	Rate	2021	24.6818	33.0027	18.3618
DALYs (Disability-Adjusted Life Years)	Russian Federation	Female	Age-standardized	Pancreatitis	Rate	1992	11.7966	16.6469	9.01917
DALYs (Disability-Adjusted Life Years)	Russian Federation	Female	Age-standardized	Pancreatitis	Rate	2021	12.02	16.8381	8.82082
DALYs (Disability-Adjusted Life Years)	Russian Federation	Both	Age-standardized	Pancreatitis	Rate	1992	16.5092	22.65	13.1035
DALYs (Disability-Adjusted Life Years)	Russian Federation	Both	Age-standardized	Pancreatitis	Rate	2021	18.4924	25.0216	13.8504
DALYs (Disability-Adjusted Life Years)	Eswatini	Male	Age-standardized	Pancreatitis	Rate	1992	8.22487	16.5216	3.95541
DALYs (Disability-Adjusted Life Years)	Eswatini	Male	Age-standardized	Pancreatitis	Rate	2021	8.92865	16.746	4.03615
DALYs (Disability-Adjusted Life Years)	Eswatini	Female	Age-standardized	Pancreatitis	Rate	1992	1.44564	2.82559	0.696918
DALYs (Disability-Adjusted Life Years)	Eswatini	Female	Age-standardized	Pancreatitis	Rate	2021	1.47725	2.67405	0.679353
DALYs (Disability-Adjusted Life Years)	Eswatini	Both	Age-standardized	Pancreatitis	Rate	1992	4.5892	8.57083	2.38006
DALYs (Disability-Adjusted Life Years)	Eswatini	Both	Age-standardized	Pancreatitis	Rate	2021	5.18469	9.13934	2.60003
DALYs (Disability-Adjusted Life Years)	Bermuda	Male	Age-standardized	Pancreatitis	Rate	1992	5.13795	6.91213	3.59755
DALYs (Disability-Adjusted Life Years)	Bermuda	Male	Age-standardized	Pancreatitis	Rate	2021	3.326	4.55183	2.44036
DALYs (Disability-Adjusted Life Years)	Bermuda	Female	Age-standardized	Pancreatitis	Rate	1992	8.9509	11.4255	6.31394
DALYs (Disability-Adjusted Life Years)	Bermuda	Female	Age-standardized	Pancreatitis	Rate	2021	4.51512	5.99252	3.31249
DALYs (Disability-Adjusted Life Years)	Bermuda	Both	Age-standardized	Pancreatitis	Rate	1992	7.03493	8.73484	5.21876
DALYs (Disability-Adjusted Life Years)	Bermuda	Both	Age-standardized	Pancreatitis	Rate	2021	3.9219	5.15412	2.96772
DALYs (Disability-Adjusted Life Years)	Czechia	Male	Age-standardized	Pancreatitis	Rate	1992	9.68641	11.8275	7.95406
DALYs (Disability-Adjusted Life Years)	Czechia	Male	Age-standardized	Pancreatitis	Rate	2021	5.75555	6.77954	4.7889
DALYs (Disability-Adjusted Life Years)	Czechia	Female	Age-standardized	Pancreatitis	Rate	1992	5.40397	6.57014	4.48145
DALYs (Disability-Adjusted Life Years)	Czechia	Female	Age-standardized	Pancreatitis	Rate	2021	2.64944	3.40869	2.05324
DALYs (Disability-Adjusted Life Years)	Czechia	Both	Age-standardized	Pancreatitis	Rate	1992	7.5901	9.06016	6.46319
DALYs (Disability-Adjusted Life Years)	Czechia	Both	Age-standardized	Pancreatitis	Rate	2021	4.24267	5.03049	3.52084
DALYs (Disability-Adjusted Life Years)	Myanmar	Male	Age-standardized	Pancreatitis	Rate	1992	14.877	33.7918	5.80133
DALYs (Disability-Adjusted Life Years)	Myanmar	Male	Age-standardized	Pancreatitis	Rate	2021	12.2691	26.1948	5.07159
DALYs (Disability-Adjusted Life Years)	Myanmar	Female	Age-standardized	Pancreatitis	Rate	1992	4.14013	9.87002	1.46114
DALYs (Disability-Adjusted Life Years)	Myanmar	Female	Age-standardized	Pancreatitis	Rate	2021	2.19289	4.53968	1.05133
DALYs (Disability-Adjusted Life Years)	Myanmar	Both	Age-standardized	Pancreatitis	Rate	1992	9.38046	19.8327	4.4851
DALYs (Disability-Adjusted Life Years)	Myanmar	Both	Age-standardized	Pancreatitis	Rate	2021	7.1786	14.5143	3.4586
DALYs (Disability-Adjusted Life Years)	Afghanistan	Male	Age-standardized	Pancreatitis	Rate	1992	3.00399	5.83484	1.37443
DALYs (Disability-Adjusted Life Years)	Afghanistan	Male	Age-standardized	Pancreatitis	Rate	2021	3.03152	5.32012	1.60927
DALYs (Disability-Adjusted Life Years)	Afghanistan	Female	Age-standardized	Pancreatitis	Rate	1992	3.70767	9.98759	1.18952
DALYs (Disability-Adjusted Life Years)	Afghanistan	Female	Age-standardized	Pancreatitis	Rate	2021	4.38617	9.73311	1.60238
DALYs (Disability-Adjusted Life Years)	Afghanistan	Both	Age-standardized	Pancreatitis	Rate	1992	3.36245	7.15371	1.66644
DALYs (Disability-Adjusted Life Years)	Afghanistan	Both	Age-standardized	Pancreatitis	Rate	2021	3.6913	6.39873	1.98223
DALYs (Disability-Adjusted Life Years)	France	Male	Age-standardized	Pancreatitis	Rate	1992	2.81808	3.53004	2.24446
DALYs (Disability-Adjusted Life Years)	France	Male	Age-standardized	Pancreatitis	Rate	2021	1.63888	2.11229	1.22374
DALYs (Disability-Adjusted Life Years)	France	Female	Age-standardized	Pancreatitis	Rate	1992	1.71053	2.19525	1.35471
DALYs (Disability-Adjusted Life Years)	France	Female	Age-standardized	Pancreatitis	Rate	2021	1.08556	1.46514	0.794334
DALYs (Disability-Adjusted Life Years)	France	Both	Age-standardized	Pancreatitis	Rate	1992	2.27219	2.77446	1.86963
DALYs (Disability-Adjusted Life Years)	France	Both	Age-standardized	Pancreatitis	Rate	2021	1.36754	1.74689	1.0718
DALYs (Disability-Adjusted Life Years)	Saudi Arabia	Male	Age-standardized	Pancreatitis	Rate	1992	3.06676	5.81123	1.57193
DALYs (Disability-Adjusted Life Years)	Saudi Arabia	Male	Age-standardized	Pancreatitis	Rate	2021	2.65135	4.61438	1.44102
DALYs (Disability-Adjusted Life Years)	Saudi Arabia	Female	Age-standardized	Pancreatitis	Rate	1992	3.77252	7.49539	1.75712
DALYs (Disability-Adjusted Life Years)	Saudi Arabia	Female	Age-standardized	Pancreatitis	Rate	2021	2.62745	4.78044	1.28161
DALYs (Disability-Adjusted Life Years)	Saudi Arabia	Both	Age-standardized	Pancreatitis	Rate	1992	3.38189	5.59054	1.93976
DALYs (Disability-Adjusted Life Years)	Saudi Arabia	Both	Age-standardized	Pancreatitis	Rate	2021	2.63628	4.14157	1.56946
DALYs (Disability-Adjusted Life Years)	El Salvador	Male	Age-standardized	Pancreatitis	Rate	1992	20.9333	31.1423	12.231
DALYs (Disability-Adjusted Life Years)	El Salvador	Male	Age-standardized	Pancreatitis	Rate	2021	11.5718	19.3384	5.87005
DALYs (Disability-Adjusted Life Years)	El Salvador	Female	Age-standardized	Pancreatitis	Rate	1992	14.0991	22.5067	7.508
DALYs (Disability-Adjusted Life Years)	El Salvador	Female	Age-standardized	Pancreatitis	Rate	2021	9.48622	15.6783	5.42119
DALYs (Disability-Adjusted Life Years)	El Salvador	Both	Age-standardized	Pancreatitis	Rate	1992	17.3153	23.8345	11.6538
DALYs (Disability-Adjusted Life Years)	El Salvador	Both	Age-standardized	Pancreatitis	Rate	2021	10.4888	15.6259	6.61137
DALYs (Disability-Adjusted Life Years)	Switzerland	Male	Age-standardized	Pancreatitis	Rate	1992	2.63721	3.3062	1.96104
DALYs (Disability-Adjusted Life Years)	Switzerland	Male	Age-standardized	Pancreatitis	Rate	2021	0.902071	1.12062	0.683056
DALYs (Disability-Adjusted Life Years)	Switzerland	Female	Age-standardized	Pancreatitis	Rate	1992	1.31751	1.63601	1.02214
DALYs (Disability-Adjusted Life Years)	Switzerland	Female	Age-standardized	Pancreatitis	Rate	2021	0.603864	0.758598	0.469749
DALYs (Disability-Adjusted Life Years)	Switzerland	Both	Age-standardized	Pancreatitis	Rate	1992	1.99579	2.40218	1.59394
DALYs (Disability-Adjusted Life Years)	Switzerland	Both	Age-standardized	Pancreatitis	Rate	2021	0.759028	0.920106	0.602418
DALYs (Disability-Adjusted Life Years)	Hungary	Male	Age-standardized	Pancreatitis	Rate	1992	12.3725	15.0938	9.78136
DALYs (Disability-Adjusted Life Years)	Hungary	Male	Age-standardized	Pancreatitis	Rate	2021	6.58977	8.43519	5.17165
DALYs (Disability-Adjusted Life Years)	Hungary	Female	Age-standardized	Pancreatitis	Rate	1992	5.52464	6.74634	4.51913
DALYs (Disability-Adjusted Life Years)	Hungary	Female	Age-standardized	Pancreatitis	Rate	2021	3.17492	4.19663	2.42468
DALYs (Disability-Adjusted Life Years)	Hungary	Both	Age-standardized	Pancreatitis	Rate	1992	9.02344	10.7565	7.50124
DALYs (Disability-Adjusted Life Years)	Hungary	Both	Age-standardized	Pancreatitis	Rate	2021	4.93131	6.18563	4.00513
DALYs (Disability-Adjusted Life Years)	Cameroon	Male	Age-standardized	Pancreatitis	Rate	1992	12.4909	29.4431	4.27337
DALYs (Disability-Adjusted Life Years)	Cameroon	Male	Age-standardized	Pancreatitis	Rate	2021	12.3978	28.2097	3.99264
DALYs (Disability-Adjusted Life Years)	Cameroon	Female	Age-standardized	Pancreatitis	Rate	1992	2.28913	4.54631	0.835644
DALYs (Disability-Adjusted Life Years)	Cameroon	Female	Age-standardized	Pancreatitis	Rate	2021	2.48053	4.89338	1.06325
DALYs (Disability-Adjusted Life Years)	Cameroon	Both	Age-standardized	Pancreatitis	Rate	1992	7.12249	15.3964	2.69607
DALYs (Disability-Adjusted Life Years)	Cameroon	Both	Age-standardized	Pancreatitis	Rate	2021	7.38514	15.487	2.86828
DALYs (Disability-Adjusted Life Years)	Guyana	Male	Age-standardized	Pancreatitis	Rate	1992	6.00275	8.73671	4.0187
DALYs (Disability-Adjusted Life Years)	Guyana	Male	Age-standardized	Pancreatitis	Rate	2021	11.0164	16.1307	7.41763
DALYs (Disability-Adjusted Life Years)	Guyana	Female	Age-standardized	Pancreatitis	Rate	1992	5.6277	8.12099	3.65086
DALYs (Disability-Adjusted Life Years)	Guyana	Female	Age-standardized	Pancreatitis	Rate	2021	12.9459	18.4083	8.67376
DALYs (Disability-Adjusted Life Years)	Guyana	Both	Age-standardized	Pancreatitis	Rate	1992	5.80807	8.12572	3.97713
DALYs (Disability-Adjusted Life Years)	Guyana	Both	Age-standardized	Pancreatitis	Rate	2021	11.9699	16.1806	8.52054
DALYs (Disability-Adjusted Life Years)	Lesotho	Male	Age-standardized	Pancreatitis	Rate	1992	6.6139	16.8586	2.37942
DALYs (Disability-Adjusted Life Years)	Lesotho	Male	Age-standardized	Pancreatitis	Rate	2021	7.60049	13.7191	3.69129
DALYs (Disability-Adjusted Life Years)	Lesotho	Female	Age-standardized	Pancreatitis	Rate	1992	1.04924	2.13372	0.439515
DALYs (Disability-Adjusted Life Years)	Lesotho	Female	Age-standardized	Pancreatitis	Rate	2021	1.48187	2.66355	0.743273
DALYs (Disability-Adjusted Life Years)	Lesotho	Both	Age-standardized	Pancreatitis	Rate	1992	3.5698	8.19776	1.50718
DALYs (Disability-Adjusted Life Years)	Lesotho	Both	Age-standardized	Pancreatitis	Rate	2021	4.51786	7.6084	2.46565
DALYs (Disability-Adjusted Life Years)	United Arab Emirates	Male	Age-standardized	Pancreatitis	Rate	1992	4.2409	7.20553	2.37245
DALYs (Disability-Adjusted Life Years)	United Arab Emirates	Male	Age-standardized	Pancreatitis	Rate	2021	3.60322	6.00731	2.01283
DALYs (Disability-Adjusted Life Years)	United Arab Emirates	Female	Age-standardized	Pancreatitis	Rate	1992	2.87289	5.01035	1.44469
DALYs (Disability-Adjusted Life Years)	United Arab Emirates	Female	Age-standardized	Pancreatitis	Rate	2021	1.78679	2.94234	1.01512
DALYs (Disability-Adjusted Life Years)	United Arab Emirates	Both	Age-standardized	Pancreatitis	Rate	1992	3.6417	5.58179	2.25817
DALYs (Disability-Adjusted Life Years)	United Arab Emirates	Both	Age-standardized	Pancreatitis	Rate	2021	2.73604	4.27753	1.70157
DALYs (Disability-Adjusted Life Years)	Armenia	Male	Age-standardized	Pancreatitis	Rate	1992	4.70396	7.94944	2.37961
DALYs (Disability-Adjusted Life Years)	Armenia	Male	Age-standardized	Pancreatitis	Rate	2021	5.05142	8.43512	3.09162
DALYs (Disability-Adjusted Life Years)	Armenia	Female	Age-standardized	Pancreatitis	Rate	1992	3.25872	5.35959	1.91593
DALYs (Disability-Adjusted Life Years)	Armenia	Female	Age-standardized	Pancreatitis	Rate	2021	2.94541	5.00951	1.70575
DALYs (Disability-Adjusted Life Years)	Armenia	Both	Age-standardized	Pancreatitis	Rate	1992	3.9857	6.55795	2.19545
DALYs (Disability-Adjusted Life Years)	Armenia	Both	Age-standardized	Pancreatitis	Rate	2021	4.05108	6.67523	2.47281
DALYs (Disability-Adjusted Life Years)	Lebanon	Male	Age-standardized	Pancreatitis	Rate	1992	2.59605	4.29073	1.44888
DALYs (Disability-Adjusted Life Years)	Lebanon	Male	Age-standardized	Pancreatitis	Rate	2021	2.03565	3.28431	1.16009
DALYs (Disability-Adjusted Life Years)	Lebanon	Female	Age-standardized	Pancreatitis	Rate	1992	3.55881	6.26347	1.67421
DALYs (Disability-Adjusted Life Years)	Lebanon	Female	Age-standardized	Pancreatitis	Rate	2021	2.03845	3.30986	1.16121
DALYs (Disability-Adjusted Life Years)	Lebanon	Both	Age-standardized	Pancreatitis	Rate	1992	3.06621	4.85682	1.79897
DALYs (Disability-Adjusted Life Years)	Lebanon	Both	Age-standardized	Pancreatitis	Rate	2021	2.03752	3.09283	1.27233
DALYs (Disability-Adjusted Life Years)	Tuvalu	Male	Age-standardized	Pancreatitis	Rate	1992	20.435	38.0593	9.27309
DALYs (Disability-Adjusted Life Years)	Tuvalu	Male	Age-standardized	Pancreatitis	Rate	2021	16.2443	31.7904	8.1847
DALYs (Disability-Adjusted Life Years)	Tuvalu	Female	Age-standardized	Pancreatitis	Rate	1992	10.4491	20.4299	4.30206
DALYs (Disability-Adjusted Life Years)	Tuvalu	Female	Age-standardized	Pancreatitis	Rate	2021	7.61365	15.0437	3.33306
DALYs (Disability-Adjusted Life Years)	Tuvalu	Both	Age-standardized	Pancreatitis	Rate	1992	15.2035	26.2897	8.12067
DALYs (Disability-Adjusted Life Years)	Tuvalu	Both	Age-standardized	Pancreatitis	Rate	2021	12.1885	22.5459	6.715
DALYs (Disability-Adjusted Life Years)	Niger	Male	Age-standardized	Pancreatitis	Rate	1992	12.7519	28.292	5.18673
DALYs (Disability-Adjusted Life Years)	Niger	Male	Age-standardized	Pancreatitis	Rate	2021	12.8799	31.6099	4.85342
DALYs (Disability-Adjusted Life Years)	Niger	Female	Age-standardized	Pancreatitis	Rate	1992	2.20839	4.97587	0.852314
DALYs (Disability-Adjusted Life Years)	Niger	Female	Age-standardized	Pancreatitis	Rate	2021	2.58951	5.46617	1.07516
DALYs (Disability-Adjusted Life Years)	Niger	Both	Age-standardized	Pancreatitis	Rate	1992	7.18608	15.0278	3.31389
DALYs (Disability-Adjusted Life Years)	Niger	Both	Age-standardized	Pancreatitis	Rate	2021	7.59506	17.2312	3.30162
DALYs (Disability-Adjusted Life Years)	Ethiopia	Male	Age-standardized	Pancreatitis	Rate	1992	6.09141	11.444	3.2606
DALYs (Disability-Adjusted Life Years)	Ethiopia	Male	Age-standardized	Pancreatitis	Rate	2021	5.60535	10.1844	2.6098
DALYs (Disability-Adjusted Life Years)	Ethiopia	Female	Age-standardized	Pancreatitis	Rate	1992	1.68797	3.21258	0.959314
DALYs (Disability-Adjusted Life Years)	Ethiopia	Female	Age-standardized	Pancreatitis	Rate	2021	1.62396	2.84497	0.825424
DALYs (Disability-Adjusted Life Years)	Ethiopia	Both	Age-standardized	Pancreatitis	Rate	1992	3.8487	6.77468	2.20253
DALYs (Disability-Adjusted Life Years)	Ethiopia	Both	Age-standardized	Pancreatitis	Rate	2021	3.63003	6.17593	1.87587
DALYs (Disability-Adjusted Life Years)	China	Male	Age-standardized	Pancreatitis	Rate	1992	5.40027	7.4022	3.50057
DALYs (Disability-Adjusted Life Years)	China	Male	Age-standardized	Pancreatitis	Rate	2021	2.83788	4.063	1.88947
DALYs (Disability-Adjusted Life Years)	China	Female	Age-standardized	Pancreatitis	Rate	1992	5.57619	8.32338	3.18211
DALYs (Disability-Adjusted Life Years)	China	Female	Age-standardized	Pancreatitis	Rate	2021	2.06625	2.95056	1.28536
DALYs (Disability-Adjusted Life Years)	China	Both	Age-standardized	Pancreatitis	Rate	1992	5.48061	7.20146	3.87503
DALYs (Disability-Adjusted Life Years)	China	Both	Age-standardized	Pancreatitis	Rate	2021	2.47679	3.2704	1.86135
DALYs (Disability-Adjusted Life Years)	United States Virgin Islands	Male	Age-standardized	Pancreatitis	Rate	1992	9.3778	16.3155	4.87791
DALYs (Disability-Adjusted Life Years)	United States Virgin Islands	Male	Age-standardized	Pancreatitis	Rate	2021	16.6757	38.0362	7.0959
DALYs (Disability-Adjusted Life Years)	United States Virgin Islands	Female	Age-standardized	Pancreatitis	Rate	1992	4.72847	8.12631	2.67465
DALYs (Disability-Adjusted Life Years)	United States Virgin Islands	Female	Age-standardized	Pancreatitis	Rate	2021	3.77816	7.37635	1.70416
DALYs (Disability-Adjusted Life Years)	United States Virgin Islands	Both	Age-standardized	Pancreatitis	Rate	1992	7.00596	10.9833	4.39375
DALYs (Disability-Adjusted Life Years)	United States Virgin Islands	Both	Age-standardized	Pancreatitis	Rate	2021	10.2046	21.2346	4.82445
DALYs (Disability-Adjusted Life Years)	Malaysia	Male	Age-standardized	Pancreatitis	Rate	1992	7.41795	12.1319	3.98297
DALYs (Disability-Adjusted Life Years)	Malaysia	Male	Age-standardized	Pancreatitis	Rate	2021	5.96705	9.98453	3.07764
DALYs (Disability-Adjusted Life Years)	Malaysia	Female	Age-standardized	Pancreatitis	Rate	1992	3.65213	6.19283	1.97957
DALYs (Disability-Adjusted Life Years)	Malaysia	Female	Age-standardized	Pancreatitis	Rate	2021	2.58939	4.33936	1.52308
DALYs (Disability-Adjusted Life Years)	Malaysia	Both	Age-standardized	Pancreatitis	Rate	1992	5.53366	8.19982	3.4676
DALYs (Disability-Adjusted Life Years)	Malaysia	Both	Age-standardized	Pancreatitis	Rate	2021	4.33004	6.73508	2.70228
DALYs (Disability-Adjusted Life Years)	Maldives	Male	Age-standardized	Pancreatitis	Rate	1992	3.376	6.45864	1.63505
DALYs (Disability-Adjusted Life Years)	Maldives	Male	Age-standardized	Pancreatitis	Rate	2021	2.24657	4.08804	1.1498
DALYs (Disability-Adjusted Life Years)	Maldives	Female	Age-standardized	Pancreatitis	Rate	1992	1.75664	3.27563	0.788403
DALYs (Disability-Adjusted Life Years)	Maldives	Female	Age-standardized	Pancreatitis	Rate	2021	0.861497	1.38989	0.496181
DALYs (Disability-Adjusted Life Years)	Maldives	Both	Age-standardized	Pancreatitis	Rate	1992	2.54501	4.16951	1.47668
DALYs (Disability-Adjusted Life Years)	Maldives	Both	Age-standardized	Pancreatitis	Rate	2021	1.66405	2.82953	0.961838
DALYs (Disability-Adjusted Life Years)	Fiji	Male	Age-standardized	Pancreatitis	Rate	1992	11.8621	21.5209	6.1488
DALYs (Disability-Adjusted Life Years)	Fiji	Male	Age-standardized	Pancreatitis	Rate	2021	8.0892	14.4557	4.29768
DALYs (Disability-Adjusted Life Years)	Fiji	Female	Age-standardized	Pancreatitis	Rate	1992	9.9319	17.9038	4.50536
DALYs (Disability-Adjusted Life Years)	Fiji	Female	Age-standardized	Pancreatitis	Rate	2021	6.28333	11.145	3.21944
DALYs (Disability-Adjusted Life Years)	Fiji	Both	Age-standardized	Pancreatitis	Rate	1992	10.87	17.9879	5.83048
DALYs (Disability-Adjusted Life Years)	Fiji	Both	Age-standardized	Pancreatitis	Rate	2021	7.20155	11.9296	4.21227
DALYs (Disability-Adjusted Life Years)	Saint Lucia	Male	Age-standardized	Pancreatitis	Rate	1992	3.93152	5.27088	2.93987
DALYs (Disability-Adjusted Life Years)	Saint Lucia	Male	Age-standardized	Pancreatitis	Rate	2021	3.56929	4.88028	2.47075
DALYs (Disability-Adjusted Life Years)	Saint Lucia	Female	Age-standardized	Pancreatitis	Rate	1992	1.57281	2.26669	1.0667
DALYs (Disability-Adjusted Life Years)	Saint Lucia	Female	Age-standardized	Pancreatitis	Rate	2021	1.30711	2.00144	0.840846
DALYs (Disability-Adjusted Life Years)	Saint Lucia	Both	Age-standardized	Pancreatitis	Rate	1992	2.73499	3.64222	2.07616
DALYs (Disability-Adjusted Life Years)	Saint Lucia	Both	Age-standardized	Pancreatitis	Rate	2021	2.4659	3.40414	1.72204
DALYs (Disability-Adjusted Life Years)	Papua New Guinea	Male	Age-standardized	Pancreatitis	Rate	1992	7.31521	20.4664	1.33795
DALYs (Disability-Adjusted Life Years)	Papua New Guinea	Male	Age-standardized	Pancreatitis	Rate	2021	5.99618	12.8099	1.86301
DALYs (Disability-Adjusted Life Years)	Papua New Guinea	Female	Age-standardized	Pancreatitis	Rate	1992	9.97598	22.4986	2.31403
DALYs (Disability-Adjusted Life Years)	Papua New Guinea	Female	Age-standardized	Pancreatitis	Rate	2021	6.32182	13.2154	2.36736
DALYs (Disability-Adjusted Life Years)	Papua New Guinea	Both	Age-standardized	Pancreatitis	Rate	1992	8.53511	19.8339	1.91703
DALYs (Disability-Adjusted Life Years)	Papua New Guinea	Both	Age-standardized	Pancreatitis	Rate	2021	6.13726	12.0349	2.5186
DALYs (Disability-Adjusted Life Years)	Republic of Korea	Male	Age-standardized	Pancreatitis	Rate	1992	6.13671	9.72145	3.4431
DALYs (Disability-Adjusted Life Years)	Republic of Korea	Male	Age-standardized	Pancreatitis	Rate	2021	2.85203	4.55773	1.73895
DALYs (Disability-Adjusted Life Years)	Republic of Korea	Female	Age-standardized	Pancreatitis	Rate	1992	5.27996	8.11852	2.74675
DALYs (Disability-Adjusted Life Years)	Republic of Korea	Female	Age-standardized	Pancreatitis	Rate	2021	2.31157	3.78577	1.36741
DALYs (Disability-Adjusted Life Years)	Republic of Korea	Both	Age-standardized	Pancreatitis	Rate	1992	5.72038	8.29913	3.61
DALYs (Disability-Adjusted Life Years)	Republic of Korea	Both	Age-standardized	Pancreatitis	Rate	2021	2.5926	4.08611	1.63827
DALYs (Disability-Adjusted Life Years)	Kazakhstan	Male	Age-standardized	Pancreatitis	Rate	1992	25.8435	35.3864	18.3125
DALYs (Disability-Adjusted Life Years)	Kazakhstan	Male	Age-standardized	Pancreatitis	Rate	2021	18.3007	24.6382	13.9238
DALYs (Disability-Adjusted Life Years)	Kazakhstan	Female	Age-standardized	Pancreatitis	Rate	1992	16.9232	22.6027	11.0788
DALYs (Disability-Adjusted Life Years)	Kazakhstan	Female	Age-standardized	Pancreatitis	Rate	2021	9.27259	12.2387	7.09003
DALYs (Disability-Adjusted Life Years)	Kazakhstan	Both	Age-standardized	Pancreatitis	Rate	1992	21.4771	28.664	15.3194
DALYs (Disability-Adjusted Life Years)	Kazakhstan	Both	Age-standardized	Pancreatitis	Rate	2021	13.8254	18.022	10.7121
DALYs (Disability-Adjusted Life Years)	Iceland	Male	Age-standardized	Pancreatitis	Rate	1992	2.06502	2.52758	1.61362
DALYs (Disability-Adjusted Life Years)	Iceland	Male	Age-standardized	Pancreatitis	Rate	2021	1.26706	1.6694	0.965401
DALYs (Disability-Adjusted Life Years)	Iceland	Female	Age-standardized	Pancreatitis	Rate	1992	1.88897	2.41563	1.46879
DALYs (Disability-Adjusted Life Years)	Iceland	Female	Age-standardized	Pancreatitis	Rate	2021	1.20115	1.59949	0.881953
DALYs (Disability-Adjusted Life Years)	Iceland	Both	Age-standardized	Pancreatitis	Rate	1992	1.97778	2.37403	1.61865
DALYs (Disability-Adjusted Life Years)	Iceland	Both	Age-standardized	Pancreatitis	Rate	2021	1.23253	1.5686	0.955509
DALYs (Disability-Adjusted Life Years)	Global	Male	Age-standardized	Pancreatitis	Rate	1992	10.0804	13.5588	7.79482
DALYs (Disability-Adjusted Life Years)	Global	Male	Age-standardized	Pancreatitis	Rate	2021	8.12758	10.4812	6.2806
DALYs (Disability-Adjusted Life Years)	Global	Female	Age-standardized	Pancreatitis	Rate	1992	6.18995	9.10398	4.40644
DALYs (Disability-Adjusted Life Years)	Global	Female	Age-standardized	Pancreatitis	Rate	2021	4.52703	6.11409	3.26228
DALYs (Disability-Adjusted Life Years)	Global	Both	Age-standardized	Pancreatitis	Rate	1992	8.1563	10.6867	6.62125
DALYs (Disability-Adjusted Life Years)	Global	Both	Age-standardized	Pancreatitis	Rate	2021	6.36276	7.9688	5.21328
DALYs (Disability-Adjusted Life Years)	Canada	Male	Age-standardized	Pancreatitis	Rate	1992	3.40099	4.31812	2.66442
DALYs (Disability-Adjusted Life Years)	Canada	Male	Age-standardized	Pancreatitis	Rate	2021	3.15397	4.06777	2.46244
DALYs (Disability-Adjusted Life Years)	Canada	Female	Age-standardized	Pancreatitis	Rate	1992	3.66355	4.72234	2.84798
DALYs (Disability-Adjusted Life Years)	Canada	Female	Age-standardized	Pancreatitis	Rate	2021	2.97992	3.92283	2.22899
DALYs (Disability-Adjusted Life Years)	Canada	Both	Age-standardized	Pancreatitis	Rate	1992	3.52651	4.38888	2.86821
DALYs (Disability-Adjusted Life Years)	Canada	Both	Age-standardized	Pancreatitis	Rate	2021	3.07036	3.8978	2.46292
DALYs (Disability-Adjusted Life Years)	Slovakia	Male	Age-standardized	Pancreatitis	Rate	1992	11.3413	16.6392	7.30973
DALYs (Disability-Adjusted Life Years)	Slovakia	Male	Age-standardized	Pancreatitis	Rate	2021	8.32767	12.7063	4.94575
DALYs (Disability-Adjusted Life Years)	Slovakia	Female	Age-standardized	Pancreatitis	Rate	1992	5.85787	8.68568	3.79203
DALYs (Disability-Adjusted Life Years)	Slovakia	Female	Age-standardized	Pancreatitis	Rate	2021	4.28166	6.56196	2.61629
DALYs (Disability-Adjusted Life Years)	Slovakia	Both	Age-standardized	Pancreatitis	Rate	1992	8.64688	11.9345	6.20206
DALYs (Disability-Adjusted Life Years)	Slovakia	Both	Age-standardized	Pancreatitis	Rate	2021	6.35659	9.05731	4.24845
DALYs (Disability-Adjusted Life Years)	Singapore	Male	Age-standardized	Pancreatitis	Rate	1992	3.2312	4.35806	2.44556
DALYs (Disability-Adjusted Life Years)	Singapore	Male	Age-standardized	Pancreatitis	Rate	2021	1.56638	2.5248	0.987882
DALYs (Disability-Adjusted Life Years)	Singapore	Female	Age-standardized	Pancreatitis	Rate	1992	4.10153	5.36628	3.10095
DALYs (Disability-Adjusted Life Years)	Singapore	Female	Age-standardized	Pancreatitis	Rate	2021	1.94662	2.9628	1.31343
DALYs (Disability-Adjusted Life Years)	Singapore	Both	Age-standardized	Pancreatitis	Rate	1992	3.6503	4.69594	2.88951
DALYs (Disability-Adjusted Life Years)	Singapore	Both	Age-standardized	Pancreatitis	Rate	2021	1.74971	2.69272	1.16928
DALYs (Disability-Adjusted Life Years)	Slovenia	Male	Age-standardized	Pancreatitis	Rate	1992	9.06745	11.0264	7.25683
DALYs (Disability-Adjusted Life Years)	Slovenia	Male	Age-standardized	Pancreatitis	Rate	2021	3.75774	4.68515	2.94102
DALYs (Disability-Adjusted Life Years)	Slovenia	Female	Age-standardized	Pancreatitis	Rate	1992	4.25324	5.20048	3.37807
DALYs (Disability-Adjusted Life Years)	Slovenia	Female	Age-standardized	Pancreatitis	Rate	2021	1.45117	1.88412	1.07732
DALYs (Disability-Adjusted Life Years)	Slovenia	Both	Age-standardized	Pancreatitis	Rate	1992	6.68344	7.78288	5.65248
DALYs (Disability-Adjusted Life Years)	Slovenia	Both	Age-standardized	Pancreatitis	Rate	2021	2.64196	3.2013	2.11039
DALYs (Disability-Adjusted Life Years)	Madagascar	Male	Age-standardized	Pancreatitis	Rate	1992	6.92335	13.8741	2.82135
DALYs (Disability-Adjusted Life Years)	Madagascar	Male	Age-standardized	Pancreatitis	Rate	2021	6.82847	13.9787	2.75581
DALYs (Disability-Adjusted Life Years)	Madagascar	Female	Age-standardized	Pancreatitis	Rate	1992	1.58376	3.20253	0.753407
DALYs (Disability-Adjusted Life Years)	Madagascar	Female	Age-standardized	Pancreatitis	Rate	2021	1.89167	3.69944	0.827071
DALYs (Disability-Adjusted Life Years)	Madagascar	Both	Age-standardized	Pancreatitis	Rate	1992	4.20185	7.80946	2.00505
DALYs (Disability-Adjusted Life Years)	Madagascar	Both	Age-standardized	Pancreatitis	Rate	2021	4.30974	8.12693	2.05802
DALYs (Disability-Adjusted Life Years)	Sao Tome and Principe	Male	Age-standardized	Pancreatitis	Rate	1992	9.11223	22.0598	2.99507
DALYs (Disability-Adjusted Life Years)	Sao Tome and Principe	Male	Age-standardized	Pancreatitis	Rate	2021	12.8521	25.8039	4.47679
DALYs (Disability-Adjusted Life Years)	Sao Tome and Principe	Female	Age-standardized	Pancreatitis	Rate	1992	1.77047	3.59706	0.733369
DALYs (Disability-Adjusted Life Years)	Sao Tome and Principe	Female	Age-standardized	Pancreatitis	Rate	2021	1.41137	2.71828	0.698044
DALYs (Disability-Adjusted Life Years)	Sao Tome and Principe	Both	Age-standardized	Pancreatitis	Rate	1992	5.46665	12.4264	1.98436
DALYs (Disability-Adjusted Life Years)	Sao Tome and Principe	Both	Age-standardized	Pancreatitis	Rate	2021	7.10907	13.6579	2.81617
DALYs (Disability-Adjusted Life Years)	Luxembourg	Male	Age-standardized	Pancreatitis	Rate	1992	3.65522	4.63245	2.82047
DALYs (Disability-Adjusted Life Years)	Luxembourg	Male	Age-standardized	Pancreatitis	Rate	2021	1.15385	1.53316	0.830223
DALYs (Disability-Adjusted Life Years)	Luxembourg	Female	Age-standardized	Pancreatitis	Rate	1992	1.90693	2.3993	1.48335
DALYs (Disability-Adjusted Life Years)	Luxembourg	Female	Age-standardized	Pancreatitis	Rate	2021	0.832866	1.11671	0.628105
DALYs (Disability-Adjusted Life Years)	Luxembourg	Both	Age-standardized	Pancreatitis	Rate	1992	2.7924	3.40113	2.26084
DALYs (Disability-Adjusted Life Years)	Luxembourg	Both	Age-standardized	Pancreatitis	Rate	2021	0.99855	1.29191	0.772846
DALYs (Disability-Adjusted Life Years)	Democratic People's Republic of Korea	Male	Age-standardized	Pancreatitis	Rate	1992	5.51103	10.6017	2.27061
DALYs (Disability-Adjusted Life Years)	Democratic People's Republic of Korea	Male	Age-standardized	Pancreatitis	Rate	2021	4.11392	8.83872	1.42845
DALYs (Disability-Adjusted Life Years)	Democratic People's Republic of Korea	Female	Age-standardized	Pancreatitis	Rate	1992	3.64813	7.7447	1.49122
DALYs (Disability-Adjusted Life Years)	Democratic People's Republic of Korea	Female	Age-standardized	Pancreatitis	Rate	2021	2.62073	5.40512	1.2012
DALYs (Disability-Adjusted Life Years)	Democratic People's Republic of Korea	Both	Age-standardized	Pancreatitis	Rate	1992	4.48332	7.98838	2.15483
DALYs (Disability-Adjusted Life Years)	Democratic People's Republic of Korea	Both	Age-standardized	Pancreatitis	Rate	2021	3.38277	6.53397	1.52867
DALYs (Disability-Adjusted Life Years)	Bahamas	Male	Age-standardized	Pancreatitis	Rate	1992	12.2636	17.655	9.11221
DALYs (Disability-Adjusted Life Years)	Bahamas	Male	Age-standardized	Pancreatitis	Rate	2021	10.2667	17.6161	6.56227
DALYs (Disability-Adjusted Life Years)	Bahamas	Female	Age-standardized	Pancreatitis	Rate	1992	8.80891	11.4718	6.77314
DALYs (Disability-Adjusted Life Years)	Bahamas	Female	Age-standardized	Pancreatitis	Rate	2021	9.37979	12.9231	6.92305
DALYs (Disability-Adjusted Life Years)	Bahamas	Both	Age-standardized	Pancreatitis	Rate	1992	10.5333	13.72	8.37137
DALYs (Disability-Adjusted Life Years)	Bahamas	Both	Age-standardized	Pancreatitis	Rate	2021	9.81964	14.4918	7.1219
DALYs (Disability-Adjusted Life Years)	Turkmenistan	Male	Age-standardized	Pancreatitis	Rate	1992	7.31714	10.8303	5.00047
DALYs (Disability-Adjusted Life Years)	Turkmenistan	Male	Age-standardized	Pancreatitis	Rate	2021	8.74344	13.4119	5.28552
DALYs (Disability-Adjusted Life Years)	Turkmenistan	Female	Age-standardized	Pancreatitis	Rate	1992	5.40635	7.94394	3.44174
DALYs (Disability-Adjusted Life Years)	Turkmenistan	Female	Age-standardized	Pancreatitis	Rate	2021	5.89882	8.93936	3.36951
DALYs (Disability-Adjusted Life Years)	Turkmenistan	Both	Age-standardized	Pancreatitis	Rate	1992	6.37489	9.07217	4.45513
DALYs (Disability-Adjusted Life Years)	Turkmenistan	Both	Age-standardized	Pancreatitis	Rate	2021	7.3999	11.1625	4.50334
DALYs (Disability-Adjusted Life Years)	Sri Lanka	Male	Age-standardized	Pancreatitis	Rate	1992	4.97427	8.84979	2.47676
DALYs (Disability-Adjusted Life Years)	Sri Lanka	Male	Age-standardized	Pancreatitis	Rate	2021	2.91551	5.36688	1.43183
DALYs (Disability-Adjusted Life Years)	Sri Lanka	Female	Age-standardized	Pancreatitis	Rate	1992	1.64782	2.69979	0.844631
DALYs (Disability-Adjusted Life Years)	Sri Lanka	Female	Age-standardized	Pancreatitis	Rate	2021	0.920468	1.50622	0.514966
DALYs (Disability-Adjusted Life Years)	Sri Lanka	Both	Age-standardized	Pancreatitis	Rate	1992	3.30721	5.38748	1.88209
DALYs (Disability-Adjusted Life Years)	Sri Lanka	Both	Age-standardized	Pancreatitis	Rate	2021	1.91493	3.25802	1.05832
DALYs (Disability-Adjusted Life Years)	Taiwan (Province of China)	Male	Age-standardized	Pancreatitis	Rate	1992	7.16775	8.7446	5.80475
DALYs (Disability-Adjusted Life Years)	Taiwan (Province of China)	Male	Age-standardized	Pancreatitis	Rate	2021	3.26331	4.22756	2.44776
DALYs (Disability-Adjusted Life Years)	Taiwan (Province of China)	Female	Age-standardized	Pancreatitis	Rate	1992	4.5652	5.63231	3.67811
DALYs (Disability-Adjusted Life Years)	Taiwan (Province of China)	Female	Age-standardized	Pancreatitis	Rate	2021	2.29709	2.94245	1.76373
DALYs (Disability-Adjusted Life Years)	Taiwan (Province of China)	Both	Age-standardized	Pancreatitis	Rate	1992	5.89981	6.88288	5.04713
DALYs (Disability-Adjusted Life Years)	Taiwan (Province of China)	Both	Age-standardized	Pancreatitis	Rate	2021	2.7999	3.46215	2.23429
DALYs (Disability-Adjusted Life Years)	Burkina Faso	Male	Age-standardized	Pancreatitis	Rate	1992	9.87598	19.5438	4.66323
DALYs (Disability-Adjusted Life Years)	Burkina Faso	Male	Age-standardized	Pancreatitis	Rate	2021	11.0956	21.3376	5.2116
DALYs (Disability-Adjusted Life Years)	Burkina Faso	Female	Age-standardized	Pancreatitis	Rate	1992	1.81459	3.61651	0.795344
DALYs (Disability-Adjusted Life Years)	Burkina Faso	Female	Age-standardized	Pancreatitis	Rate	2021	2.36742	4.64927	1.04794
DALYs (Disability-Adjusted Life Years)	Burkina Faso	Both	Age-standardized	Pancreatitis	Rate	1992	5.61714	10.4018	2.87304
DALYs (Disability-Adjusted Life Years)	Burkina Faso	Both	Age-standardized	Pancreatitis	Rate	2021	6.45784	11.6451	3.33552
DALYs (Disability-Adjusted Life Years)	Latvia	Male	Age-standardized	Pancreatitis	Rate	1992	18.4686	22.6826	14.594
DALYs (Disability-Adjusted Life Years)	Latvia	Male	Age-standardized	Pancreatitis	Rate	2021	18.2469	23.5094	14.0956
DALYs (Disability-Adjusted Life Years)	Latvia	Female	Age-standardized	Pancreatitis	Rate	1992	7.18325	9.04037	5.64222
DALYs (Disability-Adjusted Life Years)	Latvia	Female	Age-standardized	Pancreatitis	Rate	2021	7.22293	9.5001	5.32047
DALYs (Disability-Adjusted Life Years)	Latvia	Both	Age-standardized	Pancreatitis	Rate	1992	12.9529	15.5615	10.5293
DALYs (Disability-Adjusted Life Years)	Latvia	Both	Age-standardized	Pancreatitis	Rate	2021	12.8956	16.103	10.3035
DALYs (Disability-Adjusted Life Years)	Colombia	Male	Age-standardized	Pancreatitis	Rate	1992	9.16242	11.2092	7.44848
DALYs (Disability-Adjusted Life Years)	Colombia	Male	Age-standardized	Pancreatitis	Rate	2021	5.81926	7.4885	4.43243
DALYs (Disability-Adjusted Life Years)	Colombia	Female	Age-standardized	Pancreatitis	Rate	1992	9.98121	12.2367	8.08746
DALYs (Disability-Adjusted Life Years)	Colombia	Female	Age-standardized	Pancreatitis	Rate	2021	6.36535	8.13664	4.93912
DALYs (Disability-Adjusted Life Years)	Colombia	Both	Age-standardized	Pancreatitis	Rate	1992	9.55565	11.1339	8.18197
DALYs (Disability-Adjusted Life Years)	Colombia	Both	Age-standardized	Pancreatitis	Rate	2021	6.0847	7.40356	4.95757
DALYs (Disability-Adjusted Life Years)	Syrian Arab Republic	Male	Age-standardized	Pancreatitis	Rate	1992	3.11516	4.92114	1.80069
DALYs (Disability-Adjusted Life Years)	Syrian Arab Republic	Male	Age-standardized	Pancreatitis	Rate	2021	2.48647	3.99326	1.42483
DALYs (Disability-Adjusted Life Years)	Syrian Arab Republic	Female	Age-standardized	Pancreatitis	Rate	1992	2.46977	4.30018	1.22342
DALYs (Disability-Adjusted Life Years)	Syrian Arab Republic	Female	Age-standardized	Pancreatitis	Rate	2021	1.73049	2.78824	0.947471
DALYs (Disability-Adjusted Life Years)	Syrian Arab Republic	Both	Age-standardized	Pancreatitis	Rate	1992	2.79818	4.17316	1.71835
DALYs (Disability-Adjusted Life Years)	Syrian Arab Republic	Both	Age-standardized	Pancreatitis	Rate	2021	2.09041	3.13563	1.3274
DALYs (Disability-Adjusted Life Years)	Lao People's Democratic Republic	Male	Age-standardized	Pancreatitis	Rate	1992	7.92846	15.3317	3.47482
DALYs (Disability-Adjusted Life Years)	Lao People's Democratic Republic	Male	Age-standardized	Pancreatitis	Rate	2021	6.52148	11.9604	3.27481
DALYs (Disability-Adjusted Life Years)	Lao People's Democratic Republic	Female	Age-standardized	Pancreatitis	Rate	1992	2.75186	7.22234	0.952728
DALYs (Disability-Adjusted Life Years)	Lao People's Democratic Republic	Female	Age-standardized	Pancreatitis	Rate	2021	2.58416	5.29889	1.18518
DALYs (Disability-Adjusted Life Years)	Lao People's Democratic Republic	Both	Age-standardized	Pancreatitis	Rate	1992	5.2012	9.82395	2.52291
DALYs (Disability-Adjusted Life Years)	Lao People's Democratic Republic	Both	Age-standardized	Pancreatitis	Rate	2021	4.56311	7.9313	2.57163
DALYs (Disability-Adjusted Life Years)	Montenegro	Male	Age-standardized	Pancreatitis	Rate	1992	6.30773	9.86833	3.59977
DALYs (Disability-Adjusted Life Years)	Montenegro	Male	Age-standardized	Pancreatitis	Rate	2021	5.50179	9.04551	3.29154
DALYs (Disability-Adjusted Life Years)	Montenegro	Female	Age-standardized	Pancreatitis	Rate	1992	3.79986	5.80193	2.30018
DALYs (Disability-Adjusted Life Years)	Montenegro	Female	Age-standardized	Pancreatitis	Rate	2021	2.49464	3.92804	1.44796
DALYs (Disability-Adjusted Life Years)	Montenegro	Both	Age-standardized	Pancreatitis	Rate	1992	5.1025	7.31957	3.36122
DALYs (Disability-Adjusted Life Years)	Montenegro	Both	Age-standardized	Pancreatitis	Rate	2021	4.05392	6.15112	2.58677
DALYs (Disability-Adjusted Life Years)	Jamaica	Male	Age-standardized	Pancreatitis	Rate	1992	2.73411	3.97413	1.87783
DALYs (Disability-Adjusted Life Years)	Jamaica	Male	Age-standardized	Pancreatitis	Rate	2021	2.21763	3.13068	1.45934
DALYs (Disability-Adjusted Life Years)	Jamaica	Female	Age-standardized	Pancreatitis	Rate	1992	3.41491	4.61308	2.53644
DALYs (Disability-Adjusted Life Years)	Jamaica	Female	Age-standardized	Pancreatitis	Rate	2021	2.93605	4.08647	1.97519
DALYs (Disability-Adjusted Life Years)	Jamaica	Both	Age-standardized	Pancreatitis	Rate	1992	3.07768	4.12185	2.30803
DALYs (Disability-Adjusted Life Years)	Jamaica	Both	Age-standardized	Pancreatitis	Rate	2021	2.57086	3.53499	1.77074
DALYs (Disability-Adjusted Life Years)	Morocco	Male	Age-standardized	Pancreatitis	Rate	1992	2.53768	4.65914	1.21098
DALYs (Disability-Adjusted Life Years)	Morocco	Male	Age-standardized	Pancreatitis	Rate	2021	2.65724	5.31288	1.30217
DALYs (Disability-Adjusted Life Years)	Morocco	Female	Age-standardized	Pancreatitis	Rate	1992	3.1742	6.99011	1.38165
DALYs (Disability-Adjusted Life Years)	Morocco	Female	Age-standardized	Pancreatitis	Rate	2021	2.73564	5.56773	1.28444
DALYs (Disability-Adjusted Life Years)	Morocco	Both	Age-standardized	Pancreatitis	Rate	1992	2.85263	5.15215	1.49985
DALYs (Disability-Adjusted Life Years)	Morocco	Both	Age-standardized	Pancreatitis	Rate	2021	2.69492	4.85676	1.49513
DALYs (Disability-Adjusted Life Years)	Niue	Male	Age-standardized	Pancreatitis	Rate	1992	16.2556	29.1101	8.35136
DALYs (Disability-Adjusted Life Years)	Niue	Male	Age-standardized	Pancreatitis	Rate	2021	14.8562	26.1608	7.46304
DALYs (Disability-Adjusted Life Years)	Niue	Female	Age-standardized	Pancreatitis	Rate	1992	10.3414	20.1804	4.80195
DALYs (Disability-Adjusted Life Years)	Niue	Female	Age-standardized	Pancreatitis	Rate	2021	28.2898	53.8725	13.1981
DALYs (Disability-Adjusted Life Years)	Niue	Both	Age-standardized	Pancreatitis	Rate	1992	13.4772	23.0969	7.38735
DALYs (Disability-Adjusted Life Years)	Niue	Both	Age-standardized	Pancreatitis	Rate	2021	21.3388	36.6904	11.7342
DALYs (Disability-Adjusted Life Years)	Algeria	Male	Age-standardized	Pancreatitis	Rate	1992	2.73304	4.74597	1.37527
DALYs (Disability-Adjusted Life Years)	Algeria	Male	Age-standardized	Pancreatitis	Rate	2021	2.58694	4.81625	1.34876
DALYs (Disability-Adjusted Life Years)	Algeria	Female	Age-standardized	Pancreatitis	Rate	1992	2.18918	4.78018	0.984457
DALYs (Disability-Adjusted Life Years)	Algeria	Female	Age-standardized	Pancreatitis	Rate	2021	2.01362	3.48146	1.07368
DALYs (Disability-Adjusted Life Years)	Algeria	Both	Age-standardized	Pancreatitis	Rate	1992	2.46507	4.25035	1.3598
DALYs (Disability-Adjusted Life Years)	Algeria	Both	Age-standardized	Pancreatitis	Rate	2021	2.3058	3.74551	1.37718
DALYs (Disability-Adjusted Life Years)	Honduras	Male	Age-standardized	Pancreatitis	Rate	1992	28.0159	52.4291	13.241
DALYs (Disability-Adjusted Life Years)	Honduras	Male	Age-standardized	Pancreatitis	Rate	2021	16.2803	34.0245	6.58699
DALYs (Disability-Adjusted Life Years)	Honduras	Female	Age-standardized	Pancreatitis	Rate	1992	31.3006	58.5324	13.4474
DALYs (Disability-Adjusted Life Years)	Honduras	Female	Age-standardized	Pancreatitis	Rate	2021	17.473	35.4564	7.16626
DALYs (Disability-Adjusted Life Years)	Honduras	Both	Age-standardized	Pancreatitis	Rate	1992	29.6273	46.4435	17.4351
DALYs (Disability-Adjusted Life Years)	Honduras	Both	Age-standardized	Pancreatitis	Rate	2021	16.8836	30.5747	8.27865
DALYs (Disability-Adjusted Life Years)	Spain	Male	Age-standardized	Pancreatitis	Rate	1992	5.86718	7.1426	4.73992
DALYs (Disability-Adjusted Life Years)	Spain	Male	Age-standardized	Pancreatitis	Rate	2021	2.86871	3.54265	2.2714
DALYs (Disability-Adjusted Life Years)	Spain	Female	Age-standardized	Pancreatitis	Rate	1992	3.77934	4.618	3.0634
DALYs (Disability-Adjusted Life Years)	Spain	Female	Age-standardized	Pancreatitis	Rate	2021	2.44133	2.97247	1.97011
DALYs (Disability-Adjusted Life Years)	Spain	Both	Age-standardized	Pancreatitis	Rate	1992	4.84193	5.70071	4.1082
DALYs (Disability-Adjusted Life Years)	Spain	Both	Age-standardized	Pancreatitis	Rate	2021	2.65962	3.16478	2.21434
DALYs (Disability-Adjusted Life Years)	Bulgaria	Male	Age-standardized	Pancreatitis	Rate	1992	8.12491	10.1668	6.47658
DALYs (Disability-Adjusted Life Years)	Bulgaria	Male	Age-standardized	Pancreatitis	Rate	2021	8.50522	11.383	6.23778
DALYs (Disability-Adjusted Life Years)	Bulgaria	Female	Age-standardized	Pancreatitis	Rate	1992	5.78189	7.0822	4.71197
DALYs (Disability-Adjusted Life Years)	Bulgaria	Female	Age-standardized	Pancreatitis	Rate	2021	3.58044	4.80678	2.62239
DALYs (Disability-Adjusted Life Years)	Bulgaria	Both	Age-standardized	Pancreatitis	Rate	1992	6.97771	8.42076	5.82278
DALYs (Disability-Adjusted Life Years)	Bulgaria	Both	Age-standardized	Pancreatitis	Rate	2021	6.11873	8.0657	4.57697
DALYs (Disability-Adjusted Life Years)	Equatorial Guinea	Male	Age-standardized	Pancreatitis	Rate	1992	13.0192	31.3376	4.77093
DALYs (Disability-Adjusted Life Years)	Equatorial Guinea	Male	Age-standardized	Pancreatitis	Rate	2021	7.96595	17.2126	3.00483
DALYs (Disability-Adjusted Life Years)	Equatorial Guinea	Female	Age-standardized	Pancreatitis	Rate	1992	2.09446	4.5122	0.878808
DALYs (Disability-Adjusted Life Years)	Equatorial Guinea	Female	Age-standardized	Pancreatitis	Rate	2021	1.68026	3.18888	0.78018
DALYs (Disability-Adjusted Life Years)	Equatorial Guinea	Both	Age-standardized	Pancreatitis	Rate	1992	7.23791	15.9306	3.19053
DALYs (Disability-Adjusted Life Years)	Equatorial Guinea	Both	Age-standardized	Pancreatitis	Rate	2021	5.34664	10.8654	2.24183
DALYs (Disability-Adjusted Life Years)	Dominican Republic	Male	Age-standardized	Pancreatitis	Rate	1992	6.0269	10.3755	3.09928
DALYs (Disability-Adjusted Life Years)	Dominican Republic	Male	Age-standardized	Pancreatitis	Rate	2021	5.33551	10.754	2.13635
DALYs (Disability-Adjusted Life Years)	Dominican Republic	Female	Age-standardized	Pancreatitis	Rate	1992	6.86104	11.5148	3.47114
DALYs (Disability-Adjusted Life Years)	Dominican Republic	Female	Age-standardized	Pancreatitis	Rate	2021	4.91045	8.8271	2.49239
DALYs (Disability-Adjusted Life Years)	Dominican Republic	Both	Age-standardized	Pancreatitis	Rate	1992	6.4453	9.75266	3.79763
DALYs (Disability-Adjusted Life Years)	Dominican Republic	Both	Age-standardized	Pancreatitis	Rate	2021	5.12447	8.48363	2.93172
DALYs (Disability-Adjusted Life Years)	Denmark	Male	Age-standardized	Pancreatitis	Rate	1992	3.33061	4.14232	2.65414
DALYs (Disability-Adjusted Life Years)	Denmark	Male	Age-standardized	Pancreatitis	Rate	2021	1.90567	2.34745	1.52129
DALYs (Disability-Adjusted Life Years)	Denmark	Female	Age-standardized	Pancreatitis	Rate	1992	2.05954	2.63543	1.61403
DALYs (Disability-Adjusted Life Years)	Denmark	Female	Age-standardized	Pancreatitis	Rate	2021	1.23788	1.60795	0.96553
DALYs (Disability-Adjusted Life Years)	Denmark	Both	Age-standardized	Pancreatitis	Rate	1992	2.71058	3.26855	2.25924
DALYs (Disability-Adjusted Life Years)	Denmark	Both	Age-standardized	Pancreatitis	Rate	2021	1.57966	1.91669	1.30666
DALYs (Disability-Adjusted Life Years)	Seychelles	Male	Age-standardized	Pancreatitis	Rate	1992	5.83613	11.1228	2.76887
DALYs (Disability-Adjusted Life Years)	Seychelles	Male	Age-standardized	Pancreatitis	Rate	2021	1.51747	3.14381	0.547649
DALYs (Disability-Adjusted Life Years)	Seychelles	Female	Age-standardized	Pancreatitis	Rate	1992	1.80063	3.31424	1.05311
DALYs (Disability-Adjusted Life Years)	Seychelles	Female	Age-standardized	Pancreatitis	Rate	2021	1.56951	2.99352	0.825081
DALYs (Disability-Adjusted Life Years)	Seychelles	Both	Age-standardized	Pancreatitis	Rate	1992	3.80423	6.54808	2.07406
DALYs (Disability-Adjusted Life Years)	Seychelles	Both	Age-standardized	Pancreatitis	Rate	2021	1.54396	2.87533	0.795703
DALYs (Disability-Adjusted Life Years)	Northern Mariana Islands	Male	Age-standardized	Pancreatitis	Rate	1992	6.50434	13.9986	2.63147
DALYs (Disability-Adjusted Life Years)	Northern Mariana Islands	Male	Age-standardized	Pancreatitis	Rate	2021	7.488	13.2544	3.63457
DALYs (Disability-Adjusted Life Years)	Northern Mariana Islands	Female	Age-standardized	Pancreatitis	Rate	1992	2.93755	6.23218	1.40348
DALYs (Disability-Adjusted Life Years)	Northern Mariana Islands	Female	Age-standardized	Pancreatitis	Rate	2021	3.46739	6.39796	1.5906
DALYs (Disability-Adjusted Life Years)	Northern Mariana Islands	Both	Age-standardized	Pancreatitis	Rate	1992	5.35393	10.9645	2.50958
DALYs (Disability-Adjusted Life Years)	Northern Mariana Islands	Both	Age-standardized	Pancreatitis	Rate	2021	5.54	9.30016	2.92135
DALYs (Disability-Adjusted Life Years)	Mexico	Male	Age-standardized	Pancreatitis	Rate	1992	15.315	16.6877	14.1199
DALYs (Disability-Adjusted Life Years)	Mexico	Male	Age-standardized	Pancreatitis	Rate	2021	16.7746	18.7665	14.903
DALYs (Disability-Adjusted Life Years)	Mexico	Female	Age-standardized	Pancreatitis	Rate	1992	11.5841	12.5237	10.7385
DALYs (Disability-Adjusted Life Years)	Mexico	Female	Age-standardized	Pancreatitis	Rate	2021	11.7629	13.3562	10.1391
DALYs (Disability-Adjusted Life Years)	Mexico	Both	Age-standardized	Pancreatitis	Rate	1992	13.3947	14.377	12.545
DALYs (Disability-Adjusted Life Years)	Mexico	Both	Age-standardized	Pancreatitis	Rate	2021	14.2557	15.6518	12.9379
DALYs (Disability-Adjusted Life Years)	Gambia	Male	Age-standardized	Pancreatitis	Rate	1992	17.41	34.3043	7.82145
DALYs (Disability-Adjusted Life Years)	Gambia	Male	Age-standardized	Pancreatitis	Rate	2021	20.4854	41.0146	8.18302
DALYs (Disability-Adjusted Life Years)	Gambia	Female	Age-standardized	Pancreatitis	Rate	1992	2.35673	4.73479	0.983481
DALYs (Disability-Adjusted Life Years)	Gambia	Female	Age-standardized	Pancreatitis	Rate	2021	3.02362	6.07244	1.32674
DALYs (Disability-Adjusted Life Years)	Gambia	Both	Age-standardized	Pancreatitis	Rate	1992	9.64203	18.1594	4.61529
DALYs (Disability-Adjusted Life Years)	Gambia	Both	Age-standardized	Pancreatitis	Rate	2021	11.4998	21.8739	5.29583
DALYs (Disability-Adjusted Life Years)	Liberia	Male	Age-standardized	Pancreatitis	Rate	1992	9.74392	18.9609	4.71999
DALYs (Disability-Adjusted Life Years)	Liberia	Male	Age-standardized	Pancreatitis	Rate	2021	10.8375	19.8377	4.97463
DALYs (Disability-Adjusted Life Years)	Liberia	Female	Age-standardized	Pancreatitis	Rate	1992	2.23964	4.70415	0.852093
DALYs (Disability-Adjusted Life Years)	Liberia	Female	Age-standardized	Pancreatitis	Rate	2021	2.51224	4.8395	1.11918
DALYs (Disability-Adjusted Life Years)	Liberia	Both	Age-standardized	Pancreatitis	Rate	1992	5.57082	10.464	2.73404
DALYs (Disability-Adjusted Life Years)	Liberia	Both	Age-standardized	Pancreatitis	Rate	2021	6.64984	11.6421	3.38363
DALYs (Disability-Adjusted Life Years)	San Marino	Male	Age-standardized	Pancreatitis	Rate	1992	0.996329	1.62202	0.58115
DALYs (Disability-Adjusted Life Years)	San Marino	Male	Age-standardized	Pancreatitis	Rate	2021	0.80723	1.34256	0.450774
DALYs (Disability-Adjusted Life Years)	San Marino	Female	Age-standardized	Pancreatitis	Rate	1992	2.58039	4.52892	1.3414
DALYs (Disability-Adjusted Life Years)	San Marino	Female	Age-standardized	Pancreatitis	Rate	2021	1.79695	3.24652	0.936902
DALYs (Disability-Adjusted Life Years)	San Marino	Both	Age-standardized	Pancreatitis	Rate	1992	1.78569	2.81859	1.08156
DALYs (Disability-Adjusted Life Years)	San Marino	Both	Age-standardized	Pancreatitis	Rate	2021	1.28684	2.09212	0.761718
DALYs (Disability-Adjusted Life Years)	American Samoa	Male	Age-standardized	Pancreatitis	Rate	1992	12.793	26.289	4.97379
DALYs (Disability-Adjusted Life Years)	American Samoa	Male	Age-standardized	Pancreatitis	Rate	2021	17.7073	28.3474	9.1261
DALYs (Disability-Adjusted Life Years)	American Samoa	Female	Age-standardized	Pancreatitis	Rate	1992	8.87201	19.8134	4.16486
DALYs (Disability-Adjusted Life Years)	American Samoa	Female	Age-standardized	Pancreatitis	Rate	2021	12.8081	23.2522	6.159
DALYs (Disability-Adjusted Life Years)	American Samoa	Both	Age-standardized	Pancreatitis	Rate	1992	10.7091	21.4979	5.32647
DALYs (Disability-Adjusted Life Years)	American Samoa	Both	Age-standardized	Pancreatitis	Rate	2021	15.1829	23.8833	8.95761
DALYs (Disability-Adjusted Life Years)	Argentina	Male	Age-standardized	Pancreatitis	Rate	1992	8.49983	10.7188	6.69199
DALYs (Disability-Adjusted Life Years)	Argentina	Male	Age-standardized	Pancreatitis	Rate	2021	6.37362	7.99816	5.02458
DALYs (Disability-Adjusted Life Years)	Argentina	Female	Age-standardized	Pancreatitis	Rate	1992	12.1392	14.5731	10.0884
DALYs (Disability-Adjusted Life Years)	Argentina	Female	Age-standardized	Pancreatitis	Rate	2021	8.49938	10.4736	6.90759
DALYs (Disability-Adjusted Life Years)	Argentina	Both	Age-standardized	Pancreatitis	Rate	1992	10.3264	12.1635	8.73483
DALYs (Disability-Adjusted Life Years)	Argentina	Both	Age-standardized	Pancreatitis	Rate	2021	7.42497	8.9584	6.18302
DALYs (Disability-Adjusted Life Years)	Comoros	Male	Age-standardized	Pancreatitis	Rate	1992	7.59115	15.8767	3.1826
DALYs (Disability-Adjusted Life Years)	Comoros	Male	Age-standardized	Pancreatitis	Rate	2021	6.41312	12.8727	2.94139
DALYs (Disability-Adjusted Life Years)	Comoros	Female	Age-standardized	Pancreatitis	Rate	1992	2.02378	3.84025	0.917107
DALYs (Disability-Adjusted Life Years)	Comoros	Female	Age-standardized	Pancreatitis	Rate	2021	1.97718	3.7404	0.988778
DALYs (Disability-Adjusted Life Years)	Comoros	Both	Age-standardized	Pancreatitis	Rate	1992	4.78306	9.1583	2.26783
DALYs (Disability-Adjusted Life Years)	Comoros	Both	Age-standardized	Pancreatitis	Rate	2021	4.20297	7.63662	2.21199
DALYs (Disability-Adjusted Life Years)	Djibouti	Male	Age-standardized	Pancreatitis	Rate	1992	6.8561	15.3984	2.72264
DALYs (Disability-Adjusted Life Years)	Djibouti	Male	Age-standardized	Pancreatitis	Rate	2021	6.47739	13.1984	2.91438
DALYs (Disability-Adjusted Life Years)	Djibouti	Female	Age-standardized	Pancreatitis	Rate	1992	1.20941	2.23553	0.562607
DALYs (Disability-Adjusted Life Years)	Djibouti	Female	Age-standardized	Pancreatitis	Rate	2021	1.24963	2.33181	0.61024
DALYs (Disability-Adjusted Life Years)	Djibouti	Both	Age-standardized	Pancreatitis	Rate	1992	4.2149	8.90784	1.86717
DALYs (Disability-Adjusted Life Years)	Djibouti	Both	Age-standardized	Pancreatitis	Rate	2021	4.14258	8.04209	2.01627
DALYs (Disability-Adjusted Life Years)	Bhutan	Male	Age-standardized	Pancreatitis	Rate	1992	27.9482	63.2541	9.8247
DALYs (Disability-Adjusted Life Years)	Bhutan	Male	Age-standardized	Pancreatitis	Rate	2021	22.3812	47.8759	9.79068
DALYs (Disability-Adjusted Life Years)	Bhutan	Female	Age-standardized	Pancreatitis	Rate	1992	11.7223	24.6774	4.32412
DALYs (Disability-Adjusted Life Years)	Bhutan	Female	Age-standardized	Pancreatitis	Rate	2021	8.33592	17.2308	3.36576
DALYs (Disability-Adjusted Life Years)	Bhutan	Both	Age-standardized	Pancreatitis	Rate	1992	20.6247	39.4311	9.00044
DALYs (Disability-Adjusted Life Years)	Bhutan	Both	Age-standardized	Pancreatitis	Rate	2021	15.6184	29.6239	7.8702
DALYs (Disability-Adjusted Life Years)	Zambia	Male	Age-standardized	Pancreatitis	Rate	1992	7.72407	15.3588	3.71339
DALYs (Disability-Adjusted Life Years)	Zambia	Male	Age-standardized	Pancreatitis	Rate	2021	7.11029	13.9346	3.18205
DALYs (Disability-Adjusted Life Years)	Zambia	Female	Age-standardized	Pancreatitis	Rate	1992	1.84298	3.53474	0.90002
DALYs (Disability-Adjusted Life Years)	Zambia	Female	Age-standardized	Pancreatitis	Rate	2021	1.79226	3.28991	0.904781
DALYs (Disability-Adjusted Life Years)	Zambia	Both	Age-standardized	Pancreatitis	Rate	1992	4.65349	8.5895	2.48866
DALYs (Disability-Adjusted Life Years)	Zambia	Both	Age-standardized	Pancreatitis	Rate	2021	4.36893	7.8004	2.28463
DALYs (Disability-Adjusted Life Years)	South Africa	Male	Age-standardized	Pancreatitis	Rate	1992	5.18253	8.49183	3.07179
DALYs (Disability-Adjusted Life Years)	South Africa	Male	Age-standardized	Pancreatitis	Rate	2021	6.08751	9.33558	3.88273
DALYs (Disability-Adjusted Life Years)	South Africa	Female	Age-standardized	Pancreatitis	Rate	1992	1.65955	2.65887	0.987367
DALYs (Disability-Adjusted Life Years)	South Africa	Female	Age-standardized	Pancreatitis	Rate	2021	1.26795	2.09439	0.716211
DALYs (Disability-Adjusted Life Years)	South Africa	Both	Age-standardized	Pancreatitis	Rate	1992	3.36754	5.10244	2.1379
DALYs (Disability-Adjusted Life Years)	South Africa	Both	Age-standardized	Pancreatitis	Rate	2021	3.71916	5.56415	2.44061
DALYs (Disability-Adjusted Life Years)	Jordan	Male	Age-standardized	Pancreatitis	Rate	1992	3.48906	5.44233	2.10463
DALYs (Disability-Adjusted Life Years)	Jordan	Male	Age-standardized	Pancreatitis	Rate	2021	2.92319	4.43127	1.84296
DALYs (Disability-Adjusted Life Years)	Jordan	Female	Age-standardized	Pancreatitis	Rate	1992	3.80287	6.48791	1.9554
DALYs (Disability-Adjusted Life Years)	Jordan	Female	Age-standardized	Pancreatitis	Rate	2021	2.14902	3.34893	1.29185
DALYs (Disability-Adjusted Life Years)	Jordan	Both	Age-standardized	Pancreatitis	Rate	1992	3.64145	5.34471	2.29636
DALYs (Disability-Adjusted Life Years)	Jordan	Both	Age-standardized	Pancreatitis	Rate	2021	2.55792	3.69718	1.68889
Incidence	Saint Vincent and the Grenadines	Male	Age-standardized	Pancreatitis	Rate	1992	7.45682	11.7281	4.32328
Incidence	Saint Vincent and the Grenadines	Male	Age-standardized	Pancreatitis	Rate	2021	7.42865	11.7713	4.27196
Incidence	Saint Vincent and the Grenadines	Female	Age-standardized	Pancreatitis	Rate	1992	9.84955	15.3933	5.91139
Incidence	Saint Vincent and the Grenadines	Female	Age-standardized	Pancreatitis	Rate	2021	9.88895	15.439	5.84217
Incidence	Saint Vincent and the Grenadines	Both	Age-standardized	Pancreatitis	Rate	1992	8.63979	13.4821	5.13089
Incidence	Saint Vincent and the Grenadines	Both	Age-standardized	Pancreatitis	Rate	2021	8.63332	13.4928	5.09028
Incidence	Azerbaijan	Male	Age-standardized	Pancreatitis	Rate	1992	11.617	18.1364	7.02038
Incidence	Azerbaijan	Male	Age-standardized	Pancreatitis	Rate	2021	11.8599	18.3665	7.19214
Incidence	Azerbaijan	Female	Age-standardized	Pancreatitis	Rate	1992	9.81444	15.0909	5.87197
Incidence	Azerbaijan	Female	Age-standardized	Pancreatitis	Rate	2021	9.96623	15.1522	5.89727
Incidence	Azerbaijan	Both	Age-standardized	Pancreatitis	Rate	1992	10.7113	16.4597	6.44401
Incidence	Azerbaijan	Both	Age-standardized	Pancreatitis	Rate	2021	10.9567	16.7992	6.57441
Incidence	Japan	Male	Age-standardized	Pancreatitis	Rate	1992	15.746	23.3358	9.94597
Incidence	Japan	Male	Age-standardized	Pancreatitis	Rate	2021	14.8227	21.1504	9.79886
Incidence	Japan	Female	Age-standardized	Pancreatitis	Rate	1992	14.0743	21.6605	8.59287
Incidence	Japan	Female	Age-standardized	Pancreatitis	Rate	2021	12.7833	18.5135	8.36554
Incidence	Japan	Both	Age-standardized	Pancreatitis	Rate	1992	14.9248	22.445	9.31855
Incidence	Japan	Both	Age-standardized	Pancreatitis	Rate	2021	13.8237	19.8315	9.10983
Incidence	Nepal	Male	Age-standardized	Pancreatitis	Rate	1992	7.08457	11.1355	4.19828
Incidence	Nepal	Male	Age-standardized	Pancreatitis	Rate	2021	6.2284	9.03949	3.9207
Incidence	Nepal	Female	Age-standardized	Pancreatitis	Rate	1992	4.97123	7.85233	2.8475
Incidence	Nepal	Female	Age-standardized	Pancreatitis	Rate	2021	3.05707	4.3999	1.89671
Incidence	Nepal	Both	Age-standardized	Pancreatitis	Rate	1992	5.99148	9.40006	3.53312
Incidence	Nepal	Both	Age-standardized	Pancreatitis	Rate	2021	4.58159	6.59422	2.92483
Incidence	Samoa	Male	Age-standardized	Pancreatitis	Rate	1992	5.30294	8.66193	2.96041
Incidence	Samoa	Male	Age-standardized	Pancreatitis	Rate	2021	5.2303	8.45053	2.91098
Incidence	Samoa	Female	Age-standardized	Pancreatitis	Rate	1992	5.66626	9.15175	3.10549
Incidence	Samoa	Female	Age-standardized	Pancreatitis	Rate	2021	5.57151	9.0493	3.1431
Incidence	Samoa	Both	Age-standardized	Pancreatitis	Rate	1992	5.47862	8.91658	3.05538
Incidence	Samoa	Both	Age-standardized	Pancreatitis	Rate	2021	5.39506	8.71279	3.02846
Incidence	Greece	Male	Age-standardized	Pancreatitis	Rate	1992	4.981	7.79782	2.92703
Incidence	Greece	Male	Age-standardized	Pancreatitis	Rate	2021	5.68274	8.45193	3.49632
Incidence	Greece	Female	Age-standardized	Pancreatitis	Rate	1992	5.4435	8.92475	3.01292
Incidence	Greece	Female	Age-standardized	Pancreatitis	Rate	2021	4.87895	7.68026	2.82821
Incidence	Greece	Both	Age-standardized	Pancreatitis	Rate	1992	5.20383	8.2346	3.03462
Incidence	Greece	Both	Age-standardized	Pancreatitis	Rate	2021	5.28588	8.01077	3.2275
Incidence	Kenya	Male	Age-standardized	Pancreatitis	Rate	1992	6.53016	10.2336	3.81351
Incidence	Kenya	Male	Age-standardized	Pancreatitis	Rate	2021	6.24669	9.83029	3.62613
Incidence	Kenya	Female	Age-standardized	Pancreatitis	Rate	1992	7.78609	12.2416	4.57911
Incidence	Kenya	Female	Age-standardized	Pancreatitis	Rate	2021	8.12431	12.7578	4.79449
Incidence	Kenya	Both	Age-standardized	Pancreatitis	Rate	1992	7.16753	11.22	4.20774
Incidence	Kenya	Both	Age-standardized	Pancreatitis	Rate	2021	7.18738	11.2701	4.23514
Incidence	Poland	Male	Age-standardized	Pancreatitis	Rate	1992	12.4803	19.4005	7.41606
Incidence	Poland	Male	Age-standardized	Pancreatitis	Rate	2021	8.34599	11.1283	5.96383
Incidence	Poland	Female	Age-standardized	Pancreatitis	Rate	1992	9.47141	15.2988	5.30509
Incidence	Poland	Female	Age-standardized	Pancreatitis	Rate	2021	7.60038	10.0186	5.431
Incidence	Poland	Both	Age-standardized	Pancreatitis	Rate	1992	11.0044	17.2807	6.43263
Incidence	Poland	Both	Age-standardized	Pancreatitis	Rate	2021	7.98143	10.5774	5.69794
Incidence	Thailand	Male	Age-standardized	Pancreatitis	Rate	1992	4.90605	8.00506	2.73495
Incidence	Thailand	Male	Age-standardized	Pancreatitis	Rate	2021	4.86518	7.85075	2.70667
Incidence	Thailand	Female	Age-standardized	Pancreatitis	Rate	1992	5.44938	8.89008	3.00503
Incidence	Thailand	Female	Age-standardized	Pancreatitis	Rate	2021	5.4963	8.98556	3.00111
Incidence	Thailand	Both	Age-standardized	Pancreatitis	Rate	1992	5.17255	8.41689	2.88439
Incidence	Thailand	Both	Age-standardized	Pancreatitis	Rate	2021	5.16955	8.38405	2.87503
Incidence	Ghana	Male	Age-standardized	Pancreatitis	Rate	1992	5.96096	9.59713	3.34188
Incidence	Ghana	Male	Age-standardized	Pancreatitis	Rate	2021	6.01138	9.75393	3.38998
Incidence	Ghana	Female	Age-standardized	Pancreatitis	Rate	1992	6.53198	10.4667	3.72369
Incidence	Ghana	Female	Age-standardized	Pancreatitis	Rate	2021	6.61281	10.7191	3.73498
Incidence	Ghana	Both	Age-standardized	Pancreatitis	Rate	1992	6.2477	10.0035	3.55393
Incidence	Ghana	Both	Age-standardized	Pancreatitis	Rate	2021	6.31141	10.182	3.60252
Incidence	Yemen	Male	Age-standardized	Pancreatitis	Rate	1992	7.86636	12.1782	4.72349
Incidence	Yemen	Male	Age-standardized	Pancreatitis	Rate	2021	7.86893	12.2196	4.66984
Incidence	Yemen	Female	Age-standardized	Pancreatitis	Rate	1992	6.31529	9.95993	3.63285
Incidence	Yemen	Female	Age-standardized	Pancreatitis	Rate	2021	6.35813	10.1275	3.62032
Incidence	Yemen	Both	Age-standardized	Pancreatitis	Rate	1992	7.11652	11.0732	4.19619
Incidence	Yemen	Both	Age-standardized	Pancreatitis	Rate	2021	7.12381	11.11	4.1864
Incidence	Costa Rica	Male	Age-standardized	Pancreatitis	Rate	1992	12.2782	19.1486	7.27647
Incidence	Costa Rica	Male	Age-standardized	Pancreatitis	Rate	2021	11.6714	18.432	6.87344
Incidence	Costa Rica	Female	Age-standardized	Pancreatitis	Rate	1992	16.5059	25.7039	9.87872
Incidence	Costa Rica	Female	Age-standardized	Pancreatitis	Rate	2021	15.6686	24.7208	9.21182
Incidence	Costa Rica	Both	Age-standardized	Pancreatitis	Rate	1992	14.3328	22.3522	8.71942
Incidence	Costa Rica	Both	Age-standardized	Pancreatitis	Rate	2021	13.6274	21.4352	8.09652
Incidence	Georgia	Male	Age-standardized	Pancreatitis	Rate	1992	9.88194	15.7107	5.82937
Incidence	Georgia	Male	Age-standardized	Pancreatitis	Rate	2021	9.50935	15.2025	5.60625
Incidence	Georgia	Female	Age-standardized	Pancreatitis	Rate	1992	9.1256	14.2159	5.47123
Incidence	Georgia	Female	Age-standardized	Pancreatitis	Rate	2021	7.3741	11.5676	4.36389
Incidence	Georgia	Both	Age-standardized	Pancreatitis	Rate	1992	9.50283	14.8869	5.6931
Incidence	Georgia	Both	Age-standardized	Pancreatitis	Rate	2021	8.50506	13.4151	5.03937
Incidence	Italy	Male	Age-standardized	Pancreatitis	Rate	1992	4.87412	7.42086	2.99934
Incidence	Italy	Male	Age-standardized	Pancreatitis	Rate	2021	5.28809	7.22961	3.63452
Incidence	Italy	Female	Age-standardized	Pancreatitis	Rate	1992	5.38825	8.16718	3.3264
Incidence	Italy	Female	Age-standardized	Pancreatitis	Rate	2021	5.83863	7.96195	4.01136
Incidence	Italy	Both	Age-standardized	Pancreatitis	Rate	1992	5.12502	7.77671	3.15167
Incidence	Italy	Both	Age-standardized	Pancreatitis	Rate	2021	5.55526	7.57566	3.83086
Incidence	Solomon Islands	Male	Age-standardized	Pancreatitis	Rate	1992	4.9043	8.11995	2.71393
Incidence	Solomon Islands	Male	Age-standardized	Pancreatitis	Rate	2021	4.81387	7.94338	2.66448
Incidence	Solomon Islands	Female	Age-standardized	Pancreatitis	Rate	1992	5.17031	8.43045	2.88417
Incidence	Solomon Islands	Female	Age-standardized	Pancreatitis	Rate	2021	5.06141	8.37794	2.8113
Incidence	Solomon Islands	Both	Age-standardized	Pancreatitis	Rate	1992	5.02848	8.21167	2.78028
Incidence	Solomon Islands	Both	Age-standardized	Pancreatitis	Rate	2021	4.92935	8.1495	2.72918
Incidence	Viet Nam	Male	Age-standardized	Pancreatitis	Rate	1992	6.55664	10.6985	3.70255
Incidence	Viet Nam	Male	Age-standardized	Pancreatitis	Rate	2021	6.26903	9.35638	3.8779
Incidence	Viet Nam	Female	Age-standardized	Pancreatitis	Rate	1992	7.22036	11.6845	4.12322
Incidence	Viet Nam	Female	Age-standardized	Pancreatitis	Rate	2021	5.07954	7.11443	3.38333
Incidence	Viet Nam	Both	Age-standardized	Pancreatitis	Rate	1992	6.8712	11.1098	3.9258
Incidence	Viet Nam	Both	Age-standardized	Pancreatitis	Rate	2021	5.68726	8.15943	3.70078
Incidence	Venezuela (Bolivarian Republic of)	Male	Age-standardized	Pancreatitis	Rate	1992	10.6831	16.8134	6.24332
Incidence	Venezuela (Bolivarian Republic of)	Male	Age-standardized	Pancreatitis	Rate	2021	10.0863	15.8585	5.92151
Incidence	Venezuela (Bolivarian Republic of)	Female	Age-standardized	Pancreatitis	Rate	1992	13.9478	21.8196	8.23537
Incidence	Venezuela (Bolivarian Republic of)	Female	Age-standardized	Pancreatitis	Rate	2021	13.1771	20.831	7.75229
Incidence	Venezuela (Bolivarian Republic of)	Both	Age-standardized	Pancreatitis	Rate	1992	12.2811	19.2478	7.31393
Incidence	Venezuela (Bolivarian Republic of)	Both	Age-standardized	Pancreatitis	Rate	2021	11.574	18.2504	6.83139
Incidence	Palau	Male	Age-standardized	Pancreatitis	Rate	1992	5.24156	8.65193	2.86771
Incidence	Palau	Male	Age-standardized	Pancreatitis	Rate	2021	5.19327	8.52098	2.83443
Incidence	Palau	Female	Age-standardized	Pancreatitis	Rate	1992	5.61959	9.16005	3.13397
Incidence	Palau	Female	Age-standardized	Pancreatitis	Rate	2021	5.57722	9.09225	3.11646
Incidence	Palau	Both	Age-standardized	Pancreatitis	Rate	1992	5.42887	8.85099	3.01383
Incidence	Palau	Both	Age-standardized	Pancreatitis	Rate	2021	5.38998	8.8041	3.02915
Incidence	Palestine	Male	Age-standardized	Pancreatitis	Rate	1992	8.60155	13.2538	5.19582
Incidence	Palestine	Male	Age-standardized	Pancreatitis	Rate	2021	8.34456	12.9978	4.90177
Incidence	Palestine	Female	Age-standardized	Pancreatitis	Rate	1992	7.29402	11.4026	4.26544
Incidence	Palestine	Female	Age-standardized	Pancreatitis	Rate	2021	7.13671	11.2322	4.15523
Incidence	Palestine	Both	Age-standardized	Pancreatitis	Rate	1992	7.96509	12.3178	4.74472
Incidence	Palestine	Both	Age-standardized	Pancreatitis	Rate	2021	7.75577	12.0956	4.55358
Incidence	Serbia	Male	Age-standardized	Pancreatitis	Rate	1992	6.43939	10.0563	3.85361
Incidence	Serbia	Male	Age-standardized	Pancreatitis	Rate	2021	5.0853	7.98317	2.92179
Incidence	Serbia	Female	Age-standardized	Pancreatitis	Rate	1992	5.95688	9.43739	3.49678
Incidence	Serbia	Female	Age-standardized	Pancreatitis	Rate	2021	4.86246	7.7312	2.8813
Incidence	Serbia	Both	Age-standardized	Pancreatitis	Rate	1992	6.21187	9.69477	3.71919
Incidence	Serbia	Both	Age-standardized	Pancreatitis	Rate	2021	4.97228	7.73281	2.95479
Incidence	Angola	Male	Age-standardized	Pancreatitis	Rate	1992	5.10564	8.24597	2.88551
Incidence	Angola	Male	Age-standardized	Pancreatitis	Rate	2021	5.17793	8.31518	2.89748
Incidence	Angola	Female	Age-standardized	Pancreatitis	Rate	1992	5.7935	9.37894	3.23525
Incidence	Angola	Female	Age-standardized	Pancreatitis	Rate	2021	5.83696	9.41818	3.31182
Incidence	Angola	Both	Age-standardized	Pancreatitis	Rate	1992	5.44947	8.78648	3.09939
Incidence	Angola	Both	Age-standardized	Pancreatitis	Rate	2021	5.5136	8.85265	3.12509
Incidence	Kyrgyzstan	Male	Age-standardized	Pancreatitis	Rate	1992	12.1213	18.5137	7.3732
Incidence	Kyrgyzstan	Male	Age-standardized	Pancreatitis	Rate	2021	12.4485	19.2837	7.46657
Incidence	Kyrgyzstan	Female	Age-standardized	Pancreatitis	Rate	1992	10.2909	15.772	6.25646
Incidence	Kyrgyzstan	Female	Age-standardized	Pancreatitis	Rate	2021	10.6447	16.2596	6.50391
Incidence	Kyrgyzstan	Both	Age-standardized	Pancreatitis	Rate	1992	11.2143	17.1305	6.86049
Incidence	Kyrgyzstan	Both	Age-standardized	Pancreatitis	Rate	2021	11.5598	17.6672	7.01764
Incidence	Cook Islands	Male	Age-standardized	Pancreatitis	Rate	1992	5.43468	8.78614	3.02049
Incidence	Cook Islands	Male	Age-standardized	Pancreatitis	Rate	2021	5.68244	9.19953	3.25298
Incidence	Cook Islands	Female	Age-standardized	Pancreatitis	Rate	1992	6.05745	9.83674	3.38515
Incidence	Cook Islands	Female	Age-standardized	Pancreatitis	Rate	2021	6.20123	9.99703	3.41704
Incidence	Cook Islands	Both	Age-standardized	Pancreatitis	Rate	1992	5.73295	9.33483	3.18923
Incidence	Cook Islands	Both	Age-standardized	Pancreatitis	Rate	2021	5.9302	9.56536	3.35493
Incidence	Brazil	Male	Age-standardized	Pancreatitis	Rate	1992	3.94654	5.7117	2.57457
Incidence	Brazil	Male	Age-standardized	Pancreatitis	Rate	2021	2.87273	4.27434	1.81443
Incidence	Brazil	Female	Age-standardized	Pancreatitis	Rate	1992	3.10704	4.57531	1.96162
Incidence	Brazil	Female	Age-standardized	Pancreatitis	Rate	2021	3.1475	4.60528	1.97981
Incidence	Brazil	Both	Age-standardized	Pancreatitis	Rate	1992	3.52262	5.14008	2.26202
Incidence	Brazil	Both	Age-standardized	Pancreatitis	Rate	2021	3.00762	4.41968	1.90159
Incidence	Trinidad and Tobago	Male	Age-standardized	Pancreatitis	Rate	1992	7.08741	11.2248	4.09812
Incidence	Trinidad and Tobago	Male	Age-standardized	Pancreatitis	Rate	2021	6.94983	11.1096	4.01082
Incidence	Trinidad and Tobago	Female	Age-standardized	Pancreatitis	Rate	1992	9.61532	15.0733	5.69025
Incidence	Trinidad and Tobago	Female	Age-standardized	Pancreatitis	Rate	2021	9.50827	14.9936	5.62445
Incidence	Trinidad and Tobago	Both	Age-standardized	Pancreatitis	Rate	1992	8.33578	13.1062	4.89626
Incidence	Trinidad and Tobago	Both	Age-standardized	Pancreatitis	Rate	2021	8.20502	12.9075	4.83212
Incidence	Panama	Male	Age-standardized	Pancreatitis	Rate	1992	10.2731	16.2026	5.96696
Incidence	Panama	Male	Age-standardized	Pancreatitis	Rate	2021	9.97565	15.6794	5.86036
Incidence	Panama	Female	Age-standardized	Pancreatitis	Rate	1992	13.2091	20.8448	7.79141
Incidence	Panama	Female	Age-standardized	Pancreatitis	Rate	2021	12.7813	20.1898	7.54184
Incidence	Panama	Both	Age-standardized	Pancreatitis	Rate	1992	11.7059	18.2707	6.95104
Incidence	Panama	Both	Age-standardized	Pancreatitis	Rate	2021	11.3402	17.694	6.73802
Incidence	Vanuatu	Male	Age-standardized	Pancreatitis	Rate	1992	5.79594	9.47418	3.21961
Incidence	Vanuatu	Male	Age-standardized	Pancreatitis	Rate	2021	5.87114	9.47601	3.26256
Incidence	Vanuatu	Female	Age-standardized	Pancreatitis	Rate	1992	6.20755	10.1419	3.48503
Incidence	Vanuatu	Female	Age-standardized	Pancreatitis	Rate	2021	6.24778	10.0863	3.53338
Incidence	Vanuatu	Both	Age-standardized	Pancreatitis	Rate	1992	5.98779	9.82819	3.3541
Incidence	Vanuatu	Both	Age-standardized	Pancreatitis	Rate	2021	6.04743	9.70257	3.38786
Incidence	Ireland	Male	Age-standardized	Pancreatitis	Rate	1992	4.63913	6.57088	2.96601
Incidence	Ireland	Male	Age-standardized	Pancreatitis	Rate	2021	4.2453	6.92011	2.2903
Incidence	Ireland	Female	Age-standardized	Pancreatitis	Rate	1992	4.45254	6.1514	2.95337
Incidence	Ireland	Female	Age-standardized	Pancreatitis	Rate	2021	5.4727	9.03705	2.9677
Incidence	Ireland	Both	Age-standardized	Pancreatitis	Rate	1992	4.5476	6.33241	2.99348
Incidence	Ireland	Both	Age-standardized	Pancreatitis	Rate	2021	4.84675	7.94617	2.65517
Incidence	Antigua and Barbuda	Male	Age-standardized	Pancreatitis	Rate	1992	6.95529	11.0937	3.98845
Incidence	Antigua and Barbuda	Male	Age-standardized	Pancreatitis	Rate	2021	6.82366	10.8796	3.87434
Incidence	Antigua and Barbuda	Female	Age-standardized	Pancreatitis	Rate	1992	9.61064	15.2163	5.61302
Incidence	Antigua and Barbuda	Female	Age-standardized	Pancreatitis	Rate	2021	9.51975	15.0361	5.56431
Incidence	Antigua and Barbuda	Both	Age-standardized	Pancreatitis	Rate	1992	8.28751	13.1055	4.85148
Incidence	Antigua and Barbuda	Both	Age-standardized	Pancreatitis	Rate	2021	8.14684	12.9076	4.76543
Incidence	Bolivia (Plurinational State of)	Male	Age-standardized	Pancreatitis	Rate	1992	9.55658	15.175	5.52709
Incidence	Bolivia (Plurinational State of)	Male	Age-standardized	Pancreatitis	Rate	2021	8.74009	13.879	4.99146
Incidence	Bolivia (Plurinational State of)	Female	Age-standardized	Pancreatitis	Rate	1992	14.8804	23.5112	8.87076
Incidence	Bolivia (Plurinational State of)	Female	Age-standardized	Pancreatitis	Rate	2021	13.4975	21.1468	8.06767
Incidence	Bolivia (Plurinational State of)	Both	Age-standardized	Pancreatitis	Rate	1992	12.2415	19.3471	7.21011
Incidence	Bolivia (Plurinational State of)	Both	Age-standardized	Pancreatitis	Rate	2021	11.0915	17.4834	6.5422
Incidence	Malta	Male	Age-standardized	Pancreatitis	Rate	1992	4.08035	6.73353	2.24962
Incidence	Malta	Male	Age-standardized	Pancreatitis	Rate	2021	3.79014	6.21827	2.07494
Incidence	Malta	Female	Age-standardized	Pancreatitis	Rate	1992	5.65039	8.99505	3.22258
Incidence	Malta	Female	Age-standardized	Pancreatitis	Rate	2021	5.56686	8.70663	3.28948
Incidence	Malta	Both	Age-standardized	Pancreatitis	Rate	1992	4.84136	7.76637	2.755
Incidence	Malta	Both	Age-standardized	Pancreatitis	Rate	2021	4.65353	7.30584	2.70793
Incidence	Bangladesh	Male	Age-standardized	Pancreatitis	Rate	1992	8.70498	13.8731	4.99447
Incidence	Bangladesh	Male	Age-standardized	Pancreatitis	Rate	2021	9.29783	14.9281	5.38269
Incidence	Bangladesh	Female	Age-standardized	Pancreatitis	Rate	1992	7.1404	11.291	4.13907
Incidence	Bangladesh	Female	Age-standardized	Pancreatitis	Rate	2021	7.59938	12.1587	4.39909
Incidence	Bangladesh	Both	Age-standardized	Pancreatitis	Rate	1992	7.89398	12.5378	4.53843
Incidence	Bangladesh	Both	Age-standardized	Pancreatitis	Rate	2021	8.40587	13.4065	4.86883
Incidence	New Zealand	Male	Age-standardized	Pancreatitis	Rate	1992	4.92441	7.23354	3.10071
Incidence	New Zealand	Male	Age-standardized	Pancreatitis	Rate	2021	6.16948	8.61962	4.09129
Incidence	New Zealand	Female	Age-standardized	Pancreatitis	Rate	1992	8.24961	11.718	5.32211
Incidence	New Zealand	Female	Age-standardized	Pancreatitis	Rate	2021	10.6878	14.699	7.21333
Incidence	New Zealand	Both	Age-standardized	Pancreatitis	Rate	1992	6.57039	9.48114	4.21292
Incidence	New Zealand	Both	Age-standardized	Pancreatitis	Rate	2021	8.34347	11.5154	5.59243
Incidence	Oman	Male	Age-standardized	Pancreatitis	Rate	1992	7.26589	11.2718	4.30404
Incidence	Oman	Male	Age-standardized	Pancreatitis	Rate	2021	6.94586	10.7571	4.11339
Incidence	Oman	Female	Age-standardized	Pancreatitis	Rate	1992	6.06735	9.65354	3.46293
Incidence	Oman	Female	Age-standardized	Pancreatitis	Rate	2021	5.82863	9.24453	3.37026
Incidence	Oman	Both	Age-standardized	Pancreatitis	Rate	1992	6.72344	10.5657	3.94502
Incidence	Oman	Both	Age-standardized	Pancreatitis	Rate	2021	6.42998	10.0304	3.77092
Incidence	Rwanda	Male	Age-standardized	Pancreatitis	Rate	1992	5.63659	9.13794	3.23087
Incidence	Rwanda	Male	Age-standardized	Pancreatitis	Rate	2021	5.39003	8.69528	3.02753
Incidence	Rwanda	Female	Age-standardized	Pancreatitis	Rate	1992	6.01605	9.65915	3.44242
Incidence	Rwanda	Female	Age-standardized	Pancreatitis	Rate	2021	5.99154	9.64089	3.35456
Incidence	Rwanda	Both	Age-standardized	Pancreatitis	Rate	1992	5.82791	9.33591	3.34042
Incidence	Rwanda	Both	Age-standardized	Pancreatitis	Rate	2021	5.69243	9.13697	3.20259
Incidence	Eritrea	Male	Age-standardized	Pancreatitis	Rate	1992	5.25592	8.43024	2.97489
Incidence	Eritrea	Male	Age-standardized	Pancreatitis	Rate	2021	5.0697	8.27528	2.84407
Incidence	Eritrea	Female	Age-standardized	Pancreatitis	Rate	1992	5.67483	9.2503	3.18535
Incidence	Eritrea	Female	Age-standardized	Pancreatitis	Rate	2021	5.76432	9.43865	3.24421
Incidence	Eritrea	Both	Age-standardized	Pancreatitis	Rate	1992	5.45982	8.84157	3.08826
Incidence	Eritrea	Both	Age-standardized	Pancreatitis	Rate	2021	5.40438	8.82236	3.06403
Incidence	Nigeria	Male	Age-standardized	Pancreatitis	Rate	1992	7.02933	10.9809	4.13357
Incidence	Nigeria	Male	Age-standardized	Pancreatitis	Rate	2021	7.3208	11.3971	4.30192
Incidence	Nigeria	Female	Age-standardized	Pancreatitis	Rate	1992	8.70627	13.623	5.18298
Incidence	Nigeria	Female	Age-standardized	Pancreatitis	Rate	2021	9.00742	14.0843	5.34408
Incidence	Nigeria	Both	Age-standardized	Pancreatitis	Rate	1992	7.91071	12.3423	4.69227
Incidence	Nigeria	Both	Age-standardized	Pancreatitis	Rate	2021	8.19861	12.8082	4.8662
Incidence	Tajikistan	Male	Age-standardized	Pancreatitis	Rate	1992	11.4121	17.672	6.85812
Incidence	Tajikistan	Male	Age-standardized	Pancreatitis	Rate	2021	11.2543	17.2542	6.72706
Incidence	Tajikistan	Female	Age-standardized	Pancreatitis	Rate	1992	9.44526	14.6832	5.67628
Incidence	Tajikistan	Female	Age-standardized	Pancreatitis	Rate	2021	9.41462	14.4464	5.68643
Incidence	Tajikistan	Both	Age-standardized	Pancreatitis	Rate	1992	10.4243	16.0831	6.32898
Incidence	Tajikistan	Both	Age-standardized	Pancreatitis	Rate	2021	10.357	15.8523	6.24833
Incidence	Grenada	Male	Age-standardized	Pancreatitis	Rate	1992	7.28268	11.5122	4.21836
Incidence	Grenada	Male	Age-standardized	Pancreatitis	Rate	2021	6.83041	10.8006	3.95767
Incidence	Grenada	Female	Age-standardized	Pancreatitis	Rate	1992	9.6519	15.1802	5.69088
Incidence	Grenada	Female	Age-standardized	Pancreatitis	Rate	2021	9.09336	14.3864	5.31099
Incidence	Grenada	Both	Age-standardized	Pancreatitis	Rate	1992	8.45594	13.3382	4.96616
Incidence	Grenada	Both	Age-standardized	Pancreatitis	Rate	2021	7.91907	12.4472	4.63246
Incidence	Netherlands	Male	Age-standardized	Pancreatitis	Rate	1992	2.32249	3.46767	1.43342
Incidence	Netherlands	Male	Age-standardized	Pancreatitis	Rate	2021	2.92579	4.89791	1.50116
Incidence	Netherlands	Female	Age-standardized	Pancreatitis	Rate	1992	2.3837	3.45986	1.49906
Incidence	Netherlands	Female	Age-standardized	Pancreatitis	Rate	2021	3.94238	6.60073	2.08336
Incidence	Netherlands	Both	Age-standardized	Pancreatitis	Rate	1992	2.35225	3.44062	1.48716
Incidence	Netherlands	Both	Age-standardized	Pancreatitis	Rate	2021	3.42246	5.65348	1.80903
Incidence	Zimbabwe	Male	Age-standardized	Pancreatitis	Rate	1992	4.87956	7.84871	2.75879
Incidence	Zimbabwe	Male	Age-standardized	Pancreatitis	Rate	2021	5.04097	8.15009	2.84262
Incidence	Zimbabwe	Female	Age-standardized	Pancreatitis	Rate	1992	5.50586	8.96652	3.0963
Incidence	Zimbabwe	Female	Age-standardized	Pancreatitis	Rate	2021	5.73567	9.22982	3.31912
Incidence	Zimbabwe	Both	Age-standardized	Pancreatitis	Rate	1992	5.19858	8.42454	2.92798
Incidence	Zimbabwe	Both	Age-standardized	Pancreatitis	Rate	2021	5.39375	8.71329	3.08511
Incidence	Kiribati	Male	Age-standardized	Pancreatitis	Rate	1992	5.49735	8.91678	3.11681
Incidence	Kiribati	Male	Age-standardized	Pancreatitis	Rate	2021	5.56844	9.00812	3.11856
Incidence	Kiribati	Female	Age-standardized	Pancreatitis	Rate	1992	5.84247	9.51191	3.31152
Incidence	Kiribati	Female	Age-standardized	Pancreatitis	Rate	2021	5.83719	9.52019	3.26848
Incidence	Kiribati	Both	Age-standardized	Pancreatitis	Rate	1992	5.66051	9.16367	3.20565
Incidence	Kiribati	Both	Age-standardized	Pancreatitis	Rate	2021	5.69454	9.26083	3.19805
Incidence	Pakistan	Male	Age-standardized	Pancreatitis	Rate	1992	11.7092	18.3928	7.07356
Incidence	Pakistan	Male	Age-standardized	Pancreatitis	Rate	2021	12.4408	19.3398	7.50393
Incidence	Pakistan	Female	Age-standardized	Pancreatitis	Rate	1992	8.86853	13.8804	5.19316
Incidence	Pakistan	Female	Age-standardized	Pancreatitis	Rate	2021	9.50831	14.7837	5.62774
Incidence	Pakistan	Both	Age-standardized	Pancreatitis	Rate	1992	10.3457	16.125	6.20969
Incidence	Pakistan	Both	Age-standardized	Pancreatitis	Rate	2021	11.0184	17.1442	6.6069
Incidence	Mali	Male	Age-standardized	Pancreatitis	Rate	1992	5.63827	9.17037	3.1705
Incidence	Mali	Male	Age-standardized	Pancreatitis	Rate	2021	5.85824	9.53934	3.29316
Incidence	Mali	Female	Age-standardized	Pancreatitis	Rate	1992	6.11931	9.74162	3.49404
Incidence	Mali	Female	Age-standardized	Pancreatitis	Rate	2021	6.42301	10.354	3.60152
Incidence	Mali	Both	Age-standardized	Pancreatitis	Rate	1992	5.88181	9.43466	3.34153
Incidence	Mali	Both	Age-standardized	Pancreatitis	Rate	2021	6.14135	9.98861	3.48155
Incidence	Brunei Darussalam	Male	Age-standardized	Pancreatitis	Rate	1992	7.16406	11.2485	4.16038
Incidence	Brunei Darussalam	Male	Age-standardized	Pancreatitis	Rate	2021	7.01759	11.0122	4.02844
Incidence	Brunei Darussalam	Female	Age-standardized	Pancreatitis	Rate	1992	8.50837	13.3003	5.08306
Incidence	Brunei Darussalam	Female	Age-standardized	Pancreatitis	Rate	2021	8.29889	12.9289	4.81811
Incidence	Brunei Darussalam	Both	Age-standardized	Pancreatitis	Rate	1992	7.81586	12.1757	4.6672
Incidence	Brunei Darussalam	Both	Age-standardized	Pancreatitis	Rate	2021	7.63879	11.8571	4.49504
Incidence	Nicaragua	Male	Age-standardized	Pancreatitis	Rate	1992	10.9629	17.2243	6.49045
Incidence	Nicaragua	Male	Age-standardized	Pancreatitis	Rate	2021	10.3523	16.3588	6.09636
Incidence	Nicaragua	Female	Age-standardized	Pancreatitis	Rate	1992	14.0429	22.2369	8.34263
Incidence	Nicaragua	Female	Age-standardized	Pancreatitis	Rate	2021	13.1827	20.9355	7.75426
Incidence	Nicaragua	Both	Age-standardized	Pancreatitis	Rate	1992	12.4606	19.6212	7.43771
Incidence	Nicaragua	Both	Age-standardized	Pancreatitis	Rate	2021	11.722	18.4314	6.96828
Incidence	Uzbekistan	Male	Age-standardized	Pancreatitis	Rate	1992	11.4298	17.5554	6.92194
Incidence	Uzbekistan	Male	Age-standardized	Pancreatitis	Rate	2021	11.9366	18.4279	7.15376
Incidence	Uzbekistan	Female	Age-standardized	Pancreatitis	Rate	1992	9.62276	14.7178	5.83663
Incidence	Uzbekistan	Female	Age-standardized	Pancreatitis	Rate	2021	9.96926	15.3496	6.05659
Incidence	Uzbekistan	Both	Age-standardized	Pancreatitis	Rate	1992	10.5249	16.114	6.36843
Incidence	Uzbekistan	Both	Age-standardized	Pancreatitis	Rate	2021	10.9746	16.7898	6.67163
Incidence	Tokelau	Male	Age-standardized	Pancreatitis	Rate	1992	5.34796	8.68803	2.97278
Incidence	Tokelau	Male	Age-standardized	Pancreatitis	Rate	2021	5.37604	8.69923	2.98727
Incidence	Tokelau	Female	Age-standardized	Pancreatitis	Rate	1992	5.66655	9.28505	3.19107
Incidence	Tokelau	Female	Age-standardized	Pancreatitis	Rate	2021	5.64032	9.22341	3.11202
Incidence	Tokelau	Both	Age-standardized	Pancreatitis	Rate	1992	5.50507	8.96134	3.0814
Incidence	Tokelau	Both	Age-standardized	Pancreatitis	Rate	2021	5.50003	8.83205	3.07365
Incidence	Micronesia (Federated States of)	Male	Age-standardized	Pancreatitis	Rate	1992	5.50616	9.00069	3.07252
Incidence	Micronesia (Federated States of)	Male	Age-standardized	Pancreatitis	Rate	2021	5.19988	8.54612	2.89508
Incidence	Micronesia (Federated States of)	Female	Age-standardized	Pancreatitis	Rate	1992	5.81575	9.48616	3.26037
Incidence	Micronesia (Federated States of)	Female	Age-standardized	Pancreatitis	Rate	2021	5.52092	9.00022	3.03465
Incidence	Micronesia (Federated States of)	Both	Age-standardized	Pancreatitis	Rate	1992	5.64895	9.16182	3.17255
Incidence	Micronesia (Federated States of)	Both	Age-standardized	Pancreatitis	Rate	2021	5.35531	8.79536	2.95799
Incidence	Andorra	Male	Age-standardized	Pancreatitis	Rate	1992	5.54266	9.03282	3.09988
Incidence	Andorra	Male	Age-standardized	Pancreatitis	Rate	2021	5.20983	8.51533	2.8325
Incidence	Andorra	Female	Age-standardized	Pancreatitis	Rate	1992	7.09023	11.4578	3.89984
Incidence	Andorra	Female	Age-standardized	Pancreatitis	Rate	2021	6.7089	10.9468	3.74369
Incidence	Andorra	Both	Age-standardized	Pancreatitis	Rate	1992	6.28635	10.1643	3.5445
Incidence	Andorra	Both	Age-standardized	Pancreatitis	Rate	2021	5.93724	9.64429	3.30803
Incidence	Romania	Male	Age-standardized	Pancreatitis	Rate	1992	8.20337	11.5058	5.47054
Incidence	Romania	Male	Age-standardized	Pancreatitis	Rate	2021	6.4016	8.64888	4.52113
Incidence	Romania	Female	Age-standardized	Pancreatitis	Rate	1992	8.22268	11.6421	5.55929
Incidence	Romania	Female	Age-standardized	Pancreatitis	Rate	2021	6.70525	8.89248	4.8099
Incidence	Romania	Both	Age-standardized	Pancreatitis	Rate	1992	8.20834	11.5958	5.54985
Incidence	Romania	Both	Age-standardized	Pancreatitis	Rate	2021	6.54927	8.70186	4.74056
Incidence	Timor-Leste	Male	Age-standardized	Pancreatitis	Rate	1992	5.25409	8.51561	2.95953
Incidence	Timor-Leste	Male	Age-standardized	Pancreatitis	Rate	2021	5.28298	8.66239	2.96484
Incidence	Timor-Leste	Female	Age-standardized	Pancreatitis	Rate	1992	5.57152	9.12201	3.14664
Incidence	Timor-Leste	Female	Age-standardized	Pancreatitis	Rate	2021	5.69776	9.27383	3.19234
Incidence	Timor-Leste	Both	Age-standardized	Pancreatitis	Rate	1992	5.40056	8.75475	3.04322
Incidence	Timor-Leste	Both	Age-standardized	Pancreatitis	Rate	2021	5.47739	8.97684	3.07708
Incidence	Bosnia and Herzegovina	Male	Age-standardized	Pancreatitis	Rate	1992	9.39449	14.6658	5.59631
Incidence	Bosnia and Herzegovina	Male	Age-standardized	Pancreatitis	Rate	2021	9.48368	14.7052	5.63555
Incidence	Bosnia and Herzegovina	Female	Age-standardized	Pancreatitis	Rate	1992	9.09978	14.3803	5.27339
Incidence	Bosnia and Herzegovina	Female	Age-standardized	Pancreatitis	Rate	2021	9.05273	14.2644	5.27938
Incidence	Bosnia and Herzegovina	Both	Age-standardized	Pancreatitis	Rate	1992	9.26044	14.5244	5.51092
Incidence	Bosnia and Herzegovina	Both	Age-standardized	Pancreatitis	Rate	2021	9.27064	14.5127	5.50412
Incidence	Portugal	Male	Age-standardized	Pancreatitis	Rate	1992	3.69436	6.07237	1.99986
Incidence	Portugal	Male	Age-standardized	Pancreatitis	Rate	2021	4.31831	7.08383	2.37614
Incidence	Portugal	Female	Age-standardized	Pancreatitis	Rate	1992	4.56493	7.55659	2.44937
Incidence	Portugal	Female	Age-standardized	Pancreatitis	Rate	2021	4.60058	7.4554	2.52205
Incidence	Portugal	Both	Age-standardized	Pancreatitis	Rate	1992	4.12173	6.80619	2.25309
Incidence	Portugal	Both	Age-standardized	Pancreatitis	Rate	2021	4.45529	7.19851	2.47492
Incidence	Indonesia	Male	Age-standardized	Pancreatitis	Rate	1992	6.91058	11.0032	4.02216
Incidence	Indonesia	Male	Age-standardized	Pancreatitis	Rate	2021	6.64836	10.5578	3.85598
Incidence	Indonesia	Female	Age-standardized	Pancreatitis	Rate	1992	7.45128	11.8004	4.34632
Incidence	Indonesia	Female	Age-standardized	Pancreatitis	Rate	2021	7.4357	11.8045	4.3215
Incidence	Indonesia	Both	Age-standardized	Pancreatitis	Rate	1992	7.16441	11.3551	4.19054
Incidence	Indonesia	Both	Age-standardized	Pancreatitis	Rate	2021	7.03129	11.1618	4.10256
Incidence	Estonia	Male	Age-standardized	Pancreatitis	Rate	1992	18.2736	29.4347	11.0547
Incidence	Estonia	Male	Age-standardized	Pancreatitis	Rate	2021	18.8342	30.649	11.2738
Incidence	Estonia	Female	Age-standardized	Pancreatitis	Rate	1992	14.6544	21.8875	9.01544
Incidence	Estonia	Female	Age-standardized	Pancreatitis	Rate	2021	14.8727	22.3892	9.0467
Incidence	Estonia	Both	Age-standardized	Pancreatitis	Rate	1992	16.5127	25.3918	10.2588
Incidence	Estonia	Both	Age-standardized	Pancreatitis	Rate	2021	16.9084	26.0438	10.3291
Incidence	Mauritania	Male	Age-standardized	Pancreatitis	Rate	1992	5.9142	9.58715	3.35656
Incidence	Mauritania	Male	Age-standardized	Pancreatitis	Rate	2021	5.72137	9.3661	3.18535
Incidence	Mauritania	Female	Age-standardized	Pancreatitis	Rate	1992	6.46875	10.5499	3.67673
Incidence	Mauritania	Female	Age-standardized	Pancreatitis	Rate	2021	6.29392	10.2231	3.55985
Incidence	Mauritania	Both	Age-standardized	Pancreatitis	Rate	1992	6.19417	10.0681	3.49546
Incidence	Mauritania	Both	Age-standardized	Pancreatitis	Rate	2021	6.01229	9.79358	3.37371
Incidence	Lithuania	Male	Age-standardized	Pancreatitis	Rate	1992	13.3453	19.7178	8.76537
Incidence	Lithuania	Male	Age-standardized	Pancreatitis	Rate	2021	14.3929	21.223	9.51312
Incidence	Lithuania	Female	Age-standardized	Pancreatitis	Rate	1992	12.0506	18.384	7.35113
Incidence	Lithuania	Female	Age-standardized	Pancreatitis	Rate	2021	13.2178	19.8782	8.11687
Incidence	Lithuania	Both	Age-standardized	Pancreatitis	Rate	1992	12.7085	18.7974	8.16431
Incidence	Lithuania	Both	Age-standardized	Pancreatitis	Rate	2021	13.8263	20.5694	8.95462
Incidence	Uruguay	Male	Age-standardized	Pancreatitis	Rate	1992	4.57507	7.40277	2.58223
Incidence	Uruguay	Male	Age-standardized	Pancreatitis	Rate	2021	4.41604	7.16967	2.44501
Incidence	Uruguay	Female	Age-standardized	Pancreatitis	Rate	1992	13.1692	20.7143	7.81183
Incidence	Uruguay	Female	Age-standardized	Pancreatitis	Rate	2021	12.3076	19.3241	7.23337
Incidence	Uruguay	Both	Age-standardized	Pancreatitis	Rate	1992	8.82829	13.8652	5.19236
Incidence	Uruguay	Both	Age-standardized	Pancreatitis	Rate	2021	8.30075	13.0748	4.86651
Incidence	Tunisia	Male	Age-standardized	Pancreatitis	Rate	1992	8.1558	12.5575	4.84144
Incidence	Tunisia	Male	Age-standardized	Pancreatitis	Rate	2021	8.09427	12.5873	4.89347
Incidence	Tunisia	Female	Age-standardized	Pancreatitis	Rate	1992	6.73773	10.6812	3.86671
Incidence	Tunisia	Female	Age-standardized	Pancreatitis	Rate	2021	6.81685	10.7626	3.94228
Incidence	Tunisia	Both	Age-standardized	Pancreatitis	Rate	1992	7.45753	11.5549	4.37392
Incidence	Tunisia	Both	Age-standardized	Pancreatitis	Rate	2021	7.46928	11.6395	4.45348
Incidence	Gabon	Male	Age-standardized	Pancreatitis	Rate	1992	5.32384	8.52972	2.98889
Incidence	Gabon	Male	Age-standardized	Pancreatitis	Rate	2021	5.10905	8.25455	2.80722
Incidence	Gabon	Female	Age-standardized	Pancreatitis	Rate	1992	6.10121	9.7078	3.50219
Incidence	Gabon	Female	Age-standardized	Pancreatitis	Rate	2021	5.85644	9.40686	3.3337
Incidence	Gabon	Both	Age-standardized	Pancreatitis	Rate	1992	5.72055	9.08577	3.23889
Incidence	Gabon	Both	Age-standardized	Pancreatitis	Rate	2021	5.50122	8.84212	3.15565
Incidence	Uganda	Male	Age-standardized	Pancreatitis	Rate	1992	5.23633	8.44348	2.94709
Incidence	Uganda	Male	Age-standardized	Pancreatitis	Rate	2021	5.19112	8.38638	2.95192
Incidence	Uganda	Female	Age-standardized	Pancreatitis	Rate	1992	5.57196	9.07587	3.10576
Incidence	Uganda	Female	Age-standardized	Pancreatitis	Rate	2021	5.75568	9.26827	3.23061
Incidence	Uganda	Both	Age-standardized	Pancreatitis	Rate	1992	5.4085	8.75274	3.03498
Incidence	Uganda	Both	Age-standardized	Pancreatitis	Rate	2021	5.47226	8.83414	3.12728
Incidence	Austria	Male	Age-standardized	Pancreatitis	Rate	1992	6.26654	8.31308	4.5729
Incidence	Austria	Male	Age-standardized	Pancreatitis	Rate	2021	6.39872	7.75291	5.15588
Incidence	Austria	Female	Age-standardized	Pancreatitis	Rate	1992	6.38129	8.58192	4.5839
Incidence	Austria	Female	Age-standardized	Pancreatitis	Rate	2021	7.63863	9.20563	6.2938
Incidence	Austria	Both	Age-standardized	Pancreatitis	Rate	1992	6.31972	8.38358	4.59593
Incidence	Austria	Both	Age-standardized	Pancreatitis	Rate	2021	6.99558	8.40855	5.74603
Incidence	Malawi	Male	Age-standardized	Pancreatitis	Rate	1992	5.08779	8.15843	2.90879
Incidence	Malawi	Male	Age-standardized	Pancreatitis	Rate	2021	5.15175	8.41295	2.92247
Incidence	Malawi	Female	Age-standardized	Pancreatitis	Rate	1992	5.41672	8.85992	3.02851
Incidence	Malawi	Female	Age-standardized	Pancreatitis	Rate	2021	5.71972	9.42195	3.22726
Incidence	Malawi	Both	Age-standardized	Pancreatitis	Rate	1992	5.25458	8.53017	2.96497
Incidence	Malawi	Both	Age-standardized	Pancreatitis	Rate	2021	5.4413	8.85003	3.10039
Incidence	Togo	Male	Age-standardized	Pancreatitis	Rate	1992	5.75236	9.29293	3.25794
Incidence	Togo	Male	Age-standardized	Pancreatitis	Rate	2021	5.91846	9.61907	3.3101
Incidence	Togo	Female	Age-standardized	Pancreatitis	Rate	1992	6.2938	10.135	3.57557
Incidence	Togo	Female	Age-standardized	Pancreatitis	Rate	2021	6.58792	10.6407	3.7539
Incidence	Togo	Both	Age-standardized	Pancreatitis	Rate	1992	6.02572	9.63857	3.46356
Incidence	Togo	Both	Age-standardized	Pancreatitis	Rate	2021	6.24598	10.0672	3.54718
Incidence	Sierra Leone	Male	Age-standardized	Pancreatitis	Rate	1992	5.66981	9.15188	3.20199
Incidence	Sierra Leone	Male	Age-standardized	Pancreatitis	Rate	2021	5.99956	9.62965	3.41891
Incidence	Sierra Leone	Female	Age-standardized	Pancreatitis	Rate	1992	6.15535	9.86826	3.52197
Incidence	Sierra Leone	Female	Age-standardized	Pancreatitis	Rate	2021	6.62653	10.6045	3.76807
Incidence	Sierra Leone	Both	Age-standardized	Pancreatitis	Rate	1992	5.92096	9.51147	3.37595
Incidence	Sierra Leone	Both	Age-standardized	Pancreatitis	Rate	2021	6.31799	10.0503	3.60762
Incidence	Dominica	Male	Age-standardized	Pancreatitis	Rate	1992	7.50452	11.8624	4.37008
Incidence	Dominica	Male	Age-standardized	Pancreatitis	Rate	2021	7.39238	11.5776	4.32666
Incidence	Dominica	Female	Age-standardized	Pancreatitis	Rate	1992	10.0142	15.6139	5.89878
Incidence	Dominica	Female	Age-standardized	Pancreatitis	Rate	2021	10.057	15.8689	5.93305
Incidence	Dominica	Both	Age-standardized	Pancreatitis	Rate	1992	8.71342	13.6459	5.15653
Incidence	Dominica	Both	Age-standardized	Pancreatitis	Rate	2021	8.69537	13.5889	5.10744
Incidence	Sweden	Male	Age-standardized	Pancreatitis	Rate	1992	9.40497	14.7085	5.57045
Incidence	Sweden	Male	Age-standardized	Pancreatitis	Rate	2021	11.1129	17.2822	6.62379
Incidence	Sweden	Female	Age-standardized	Pancreatitis	Rate	1992	10.1254	15.8911	6.01849
Incidence	Sweden	Female	Age-standardized	Pancreatitis	Rate	2021	12.7076	19.8697	7.41931
Incidence	Sweden	Both	Age-standardized	Pancreatitis	Rate	1992	9.75473	15.2408	5.821
Incidence	Sweden	Both	Age-standardized	Pancreatitis	Rate	2021	11.8867	18.4008	7.04567
Incidence	Cyprus	Male	Age-standardized	Pancreatitis	Rate	1992	2.83786	4.69889	1.55972
Incidence	Cyprus	Male	Age-standardized	Pancreatitis	Rate	2021	2.37053	3.83599	1.30714
Incidence	Cyprus	Female	Age-standardized	Pancreatitis	Rate	1992	4.61067	7.3031	2.6647
Incidence	Cyprus	Female	Age-standardized	Pancreatitis	Rate	2021	3.42037	5.35852	1.99921
Incidence	Cyprus	Both	Age-standardized	Pancreatitis	Rate	1992	3.69048	5.92467	2.09921
Incidence	Cyprus	Both	Age-standardized	Pancreatitis	Rate	2021	2.87643	4.51715	1.66157
Incidence	Croatia	Male	Age-standardized	Pancreatitis	Rate	1992	4.51107	6.24981	3.15637
Incidence	Croatia	Male	Age-standardized	Pancreatitis	Rate	2021	5.19984	7.12864	3.66409
Incidence	Croatia	Female	Age-standardized	Pancreatitis	Rate	1992	5.35509	7.1078	3.84418
Incidence	Croatia	Female	Age-standardized	Pancreatitis	Rate	2021	5.58837	7.23728	4.14758
Incidence	Croatia	Both	Age-standardized	Pancreatitis	Rate	1992	4.92422	6.64991	3.51305
Incidence	Croatia	Both	Age-standardized	Pancreatitis	Rate	2021	5.3894	7.12781	3.93091
Incidence	Guatemala	Male	Age-standardized	Pancreatitis	Rate	1992	11.9954	18.9332	7.14939
Incidence	Guatemala	Male	Age-standardized	Pancreatitis	Rate	2021	11.0433	17.3465	6.54051
Incidence	Guatemala	Female	Age-standardized	Pancreatitis	Rate	1992	15.0903	23.7628	8.93478
Incidence	Guatemala	Female	Age-standardized	Pancreatitis	Rate	2021	13.7805	21.6875	8.17882
Incidence	Guatemala	Both	Age-standardized	Pancreatitis	Rate	1992	13.5184	21.2266	8.10755
Incidence	Guatemala	Both	Age-standardized	Pancreatitis	Rate	2021	12.3786	19.3481	7.39197
Incidence	United Kingdom	Male	Age-standardized	Pancreatitis	Rate	1992	5.55241	8.13416	3.56344
Incidence	United Kingdom	Male	Age-standardized	Pancreatitis	Rate	2021	5.59855	8.13159	3.64511
Incidence	United Kingdom	Female	Age-standardized	Pancreatitis	Rate	1992	6.71265	9.86196	4.30151
Incidence	United Kingdom	Female	Age-standardized	Pancreatitis	Rate	2021	7.61846	10.9633	4.9436
Incidence	United Kingdom	Both	Age-standardized	Pancreatitis	Rate	1992	6.12099	8.99442	3.9268
Incidence	United Kingdom	Both	Age-standardized	Pancreatitis	Rate	2021	6.59236	9.54128	4.30394
Incidence	Mauritius	Male	Age-standardized	Pancreatitis	Rate	1992	5.56901	9.1067	3.08007
Incidence	Mauritius	Male	Age-standardized	Pancreatitis	Rate	2021	5.10768	8.38234	2.86308
Incidence	Mauritius	Female	Age-standardized	Pancreatitis	Rate	1992	6.21307	10.1726	3.45095
Incidence	Mauritius	Female	Age-standardized	Pancreatitis	Rate	2021	5.75887	9.49121	3.12976
Incidence	Mauritius	Both	Age-standardized	Pancreatitis	Rate	1992	5.88808	9.61771	3.29299
Incidence	Mauritius	Both	Age-standardized	Pancreatitis	Rate	2021	5.42883	8.90375	3.02775
Incidence	Iran (Islamic Republic of)	Male	Age-standardized	Pancreatitis	Rate	1992	7.87053	12.0152	4.76495
Incidence	Iran (Islamic Republic of)	Male	Age-standardized	Pancreatitis	Rate	2021	7.76255	11.9117	4.67597
Incidence	Iran (Islamic Republic of)	Female	Age-standardized	Pancreatitis	Rate	1992	6.18537	9.6882	3.62844
Incidence	Iran (Islamic Republic of)	Female	Age-standardized	Pancreatitis	Rate	2021	6.53078	10.1767	3.84599
Incidence	Iran (Islamic Republic of)	Both	Age-standardized	Pancreatitis	Rate	1992	7.04054	10.7766	4.2115
Incidence	Iran (Islamic Republic of)	Both	Age-standardized	Pancreatitis	Rate	2021	7.16147	10.9889	4.27304
Incidence	North Macedonia	Male	Age-standardized	Pancreatitis	Rate	1992	9.40446	14.4384	5.66186
Incidence	North Macedonia	Male	Age-standardized	Pancreatitis	Rate	2021	9.07902	14.1874	5.42318
Incidence	North Macedonia	Female	Age-standardized	Pancreatitis	Rate	1992	8.83221	13.7331	5.16324
Incidence	North Macedonia	Female	Age-standardized	Pancreatitis	Rate	2021	8.35162	13.1879	4.81091
Incidence	North Macedonia	Both	Age-standardized	Pancreatitis	Rate	1992	9.12233	14.1095	5.42219
Incidence	North Macedonia	Both	Age-standardized	Pancreatitis	Rate	2021	8.73048	13.7144	5.18789
Incidence	Senegal	Male	Age-standardized	Pancreatitis	Rate	1992	5.90643	9.54446	3.3166
Incidence	Senegal	Male	Age-standardized	Pancreatitis	Rate	2021	5.86296	9.45098	3.29992
Incidence	Senegal	Female	Age-standardized	Pancreatitis	Rate	1992	6.50865	10.5594	3.73696
Incidence	Senegal	Female	Age-standardized	Pancreatitis	Rate	2021	6.61985	10.6947	3.77356
Incidence	Senegal	Both	Age-standardized	Pancreatitis	Rate	1992	6.21684	10.0523	3.54544
Incidence	Senegal	Both	Age-standardized	Pancreatitis	Rate	2021	6.22936	9.9959	3.54289
Incidence	South Sudan	Male	Age-standardized	Pancreatitis	Rate	1992	5.00089	8.07558	2.79966
Incidence	South Sudan	Male	Age-standardized	Pancreatitis	Rate	2021	4.7785	7.89373	2.67482
Incidence	South Sudan	Female	Age-standardized	Pancreatitis	Rate	1992	5.39177	8.67758	3.0253
Incidence	South Sudan	Female	Age-standardized	Pancreatitis	Rate	2021	5.3767	8.65576	3.00338
Incidence	South Sudan	Both	Age-standardized	Pancreatitis	Rate	1992	5.18823	8.36541	2.91903
Incidence	South Sudan	Both	Age-standardized	Pancreatitis	Rate	2021	5.07309	8.27313	2.87247
Incidence	Finland	Male	Age-standardized	Pancreatitis	Rate	1992	4.93296	6.96488	3.34031
Incidence	Finland	Male	Age-standardized	Pancreatitis	Rate	2021	5.15499	7.27999	3.41488
Incidence	Finland	Female	Age-standardized	Pancreatitis	Rate	1992	5.73353	7.71259	4.12951
Incidence	Finland	Female	Age-standardized	Pancreatitis	Rate	2021	5.63155	7.32466	4.23682
Incidence	Finland	Both	Age-standardized	Pancreatitis	Rate	1992	5.32434	7.32786	3.74796
Incidence	Finland	Both	Age-standardized	Pancreatitis	Rate	2021	5.38769	7.22264	3.88096
Incidence	Israel	Male	Age-standardized	Pancreatitis	Rate	1992	4.87487	7.97071	2.71039
Incidence	Israel	Male	Age-standardized	Pancreatitis	Rate	2021	4.68852	7.78979	2.54354
Incidence	Israel	Female	Age-standardized	Pancreatitis	Rate	1992	6.39562	10.4074	3.51587
Incidence	Israel	Female	Age-standardized	Pancreatitis	Rate	2021	6.11464	10.106	3.3382
Incidence	Israel	Both	Age-standardized	Pancreatitis	Rate	1992	5.61663	9.14371	3.089
Incidence	Israel	Both	Age-standardized	Pancreatitis	Rate	2021	5.38453	8.94952	2.98461
Incidence	Ukraine	Male	Age-standardized	Pancreatitis	Rate	1992	25.0431	40.5495	14.9534
Incidence	Ukraine	Male	Age-standardized	Pancreatitis	Rate	2021	25.2345	41.2099	14.938
Incidence	Ukraine	Female	Age-standardized	Pancreatitis	Rate	1992	19.6849	29.3512	12.1208
Incidence	Ukraine	Female	Age-standardized	Pancreatitis	Rate	2021	21.4141	31.5336	13.1593
Incidence	Ukraine	Both	Age-standardized	Pancreatitis	Rate	1992	22.3919	34.9684	13.6756
Incidence	Ukraine	Both	Age-standardized	Pancreatitis	Rate	2021	23.3747	36.2594	14.2948
Incidence	Iraq	Male	Age-standardized	Pancreatitis	Rate	1992	7.44	11.517	4.45504
Incidence	Iraq	Male	Age-standardized	Pancreatitis	Rate	2021	6.8667	10.7154	4.01315
Incidence	Iraq	Female	Age-standardized	Pancreatitis	Rate	1992	6.06603	9.57168	3.45617
Incidence	Iraq	Female	Age-standardized	Pancreatitis	Rate	2021	5.61623	8.91051	3.16407
Incidence	Iraq	Both	Age-standardized	Pancreatitis	Rate	1992	6.78158	10.609	4.01481
Incidence	Iraq	Both	Age-standardized	Pancreatitis	Rate	2021	6.26219	9.77823	3.63445
Incidence	Namibia	Male	Age-standardized	Pancreatitis	Rate	1992	5.25468	8.5549	2.96105
Incidence	Namibia	Male	Age-standardized	Pancreatitis	Rate	2021	5.35461	8.60829	3.05202
Incidence	Namibia	Female	Age-standardized	Pancreatitis	Rate	1992	5.99601	9.69963	3.36073
Incidence	Namibia	Female	Age-standardized	Pancreatitis	Rate	2021	6.12539	9.80312	3.45292
Incidence	Namibia	Both	Age-standardized	Pancreatitis	Rate	1992	5.63063	9.1136	3.15725
Incidence	Namibia	Both	Age-standardized	Pancreatitis	Rate	2021	5.74253	9.15801	3.26117
Incidence	Suriname	Male	Age-standardized	Pancreatitis	Rate	1992	7.44826	11.8365	4.36966
Incidence	Suriname	Male	Age-standardized	Pancreatitis	Rate	2021	7.40208	11.7751	4.19681
Incidence	Suriname	Female	Age-standardized	Pancreatitis	Rate	1992	9.75851	15.3962	5.77808
Incidence	Suriname	Female	Age-standardized	Pancreatitis	Rate	2021	9.85797	15.3017	5.84625
Incidence	Suriname	Both	Age-standardized	Pancreatitis	Rate	1992	8.59294	13.66	5.07053
Incidence	Suriname	Both	Age-standardized	Pancreatitis	Rate	2021	8.5923	13.4111	5.05973
Incidence	Greenland	Male	Age-standardized	Pancreatitis	Rate	1992	10.6145	16.8174	6.27362
Incidence	Greenland	Male	Age-standardized	Pancreatitis	Rate	2021	10.2473	16.334	6.00387
Incidence	Greenland	Female	Age-standardized	Pancreatitis	Rate	1992	15.3299	23.6866	9.26562
Incidence	Greenland	Female	Age-standardized	Pancreatitis	Rate	2021	14.739	22.982	8.79572
Incidence	Greenland	Both	Age-standardized	Pancreatitis	Rate	1992	12.8858	20.1262	7.73433
Incidence	Greenland	Both	Age-standardized	Pancreatitis	Rate	2021	12.458	19.5631	7.45628
Incidence	Germany	Male	Age-standardized	Pancreatitis	Rate	1992	7.7602	11.9309	4.70519
Incidence	Germany	Male	Age-standardized	Pancreatitis	Rate	2021	7.87353	11.6408	4.86661
Incidence	Germany	Female	Age-standardized	Pancreatitis	Rate	1992	10.213	13.4363	7.5948
Incidence	Germany	Female	Age-standardized	Pancreatitis	Rate	2021	10.152	12.1142	8.37568
Incidence	Germany	Both	Age-standardized	Pancreatitis	Rate	1992	8.95255	12.6118	6.14187
Incidence	Germany	Both	Age-standardized	Pancreatitis	Rate	2021	8.95695	11.5925	6.69916
Incidence	Philippines	Male	Age-standardized	Pancreatitis	Rate	1992	5.06367	8.02365	2.87499
Incidence	Philippines	Male	Age-standardized	Pancreatitis	Rate	2021	6.23958	9.79738	3.6335
Incidence	Philippines	Female	Age-standardized	Pancreatitis	Rate	1992	6.26473	9.93012	3.64136
Incidence	Philippines	Female	Age-standardized	Pancreatitis	Rate	2021	7.1086	11.1882	4.16537
Incidence	Philippines	Both	Age-standardized	Pancreatitis	Rate	1992	5.65442	8.9375	3.26485
Incidence	Philippines	Both	Age-standardized	Pancreatitis	Rate	2021	6.65897	10.4432	3.87192
Incidence	Haiti	Male	Age-standardized	Pancreatitis	Rate	1992	7.40454	11.6846	4.27823
Incidence	Haiti	Male	Age-standardized	Pancreatitis	Rate	2021	7.35057	11.5997	4.24069
Incidence	Haiti	Female	Age-standardized	Pancreatitis	Rate	1992	9.49781	14.7974	5.63832
Incidence	Haiti	Female	Age-standardized	Pancreatitis	Rate	2021	9.47444	14.7146	5.59235
Incidence	Haiti	Both	Age-standardized	Pancreatitis	Rate	1992	8.47119	13.2564	5.03602
Incidence	Haiti	Both	Age-standardized	Pancreatitis	Rate	2021	8.40537	13.11	4.96464
Incidence	Democratic Republic of the Congo	Male	Age-standardized	Pancreatitis	Rate	1992	5.13851	8.26202	2.89059
Incidence	Democratic Republic of the Congo	Male	Age-standardized	Pancreatitis	Rate	2021	5.07055	8.2708	2.85412
Incidence	Democratic Republic of the Congo	Female	Age-standardized	Pancreatitis	Rate	1992	5.85095	9.46606	3.31391
Incidence	Democratic Republic of the Congo	Female	Age-standardized	Pancreatitis	Rate	2021	5.74711	9.40624	3.20043
Incidence	Democratic Republic of the Congo	Both	Age-standardized	Pancreatitis	Rate	1992	5.49154	8.87698	3.11317
Incidence	Democratic Republic of the Congo	Both	Age-standardized	Pancreatitis	Rate	2021	5.40359	8.8138	3.04653
Incidence	Guam	Male	Age-standardized	Pancreatitis	Rate	1992	4.84988	7.95144	2.66418
Incidence	Guam	Male	Age-standardized	Pancreatitis	Rate	2021	4.85824	8.04189	2.68093
Incidence	Guam	Female	Age-standardized	Pancreatitis	Rate	1992	5.19876	8.62804	2.86778
Incidence	Guam	Female	Age-standardized	Pancreatitis	Rate	2021	5.16329	8.53867	2.8274
Incidence	Guam	Both	Age-standardized	Pancreatitis	Rate	1992	5.02888	8.25054	2.78485
Incidence	Guam	Both	Age-standardized	Pancreatitis	Rate	2021	5.0091	8.26647	2.77787
Incidence	Qatar	Male	Age-standardized	Pancreatitis	Rate	1992	8.53619	13.1823	5.08941
Incidence	Qatar	Male	Age-standardized	Pancreatitis	Rate	2021	7.94198	12.2898	4.70127
Incidence	Qatar	Female	Age-standardized	Pancreatitis	Rate	1992	7.22218	11.3635	4.2336
Incidence	Qatar	Female	Age-standardized	Pancreatitis	Rate	2021	6.782	10.7375	3.87696
Incidence	Qatar	Both	Age-standardized	Pancreatitis	Rate	1992	8.0137	12.4911	4.74726
Incidence	Qatar	Both	Age-standardized	Pancreatitis	Rate	2021	7.49017	11.6665	4.41786
Incidence	Paraguay	Male	Age-standardized	Pancreatitis	Rate	1992	4.29437	6.88336	2.37699
Incidence	Paraguay	Male	Age-standardized	Pancreatitis	Rate	2021	4.3386	6.9718	2.42308
Incidence	Paraguay	Female	Age-standardized	Pancreatitis	Rate	1992	4.54805	7.25562	2.52858
Incidence	Paraguay	Female	Age-standardized	Pancreatitis	Rate	2021	4.59027	7.41231	2.57019
Incidence	Paraguay	Both	Age-standardized	Pancreatitis	Rate	1992	4.41799	7.04982	2.45573
Incidence	Paraguay	Both	Age-standardized	Pancreatitis	Rate	2021	4.46095	7.1389	2.50913
Incidence	Somalia	Male	Age-standardized	Pancreatitis	Rate	1992	4.8998	7.9151	2.75954
Incidence	Somalia	Male	Age-standardized	Pancreatitis	Rate	2021	4.71402	7.63814	2.62123
Incidence	Somalia	Female	Age-standardized	Pancreatitis	Rate	1992	5.27102	8.53535	2.92235
Incidence	Somalia	Female	Age-standardized	Pancreatitis	Rate	2021	5.35767	8.73042	2.96173
Incidence	Somalia	Both	Age-standardized	Pancreatitis	Rate	1992	5.07551	8.2301	2.83958
Incidence	Somalia	Both	Age-standardized	Pancreatitis	Rate	2021	5.02214	8.10759	2.80253
Incidence	United States of America	Male	Age-standardized	Pancreatitis	Rate	1992	9.25516	13.4042	5.95701
Incidence	United States of America	Male	Age-standardized	Pancreatitis	Rate	2021	9.36857	11.7725	7.25132
Incidence	United States of America	Female	Age-standardized	Pancreatitis	Rate	1992	14.2424	20.0973	9.35075
Incidence	United States of America	Female	Age-standardized	Pancreatitis	Rate	2021	13.1157	16.3515	10.1953
Incidence	United States of America	Both	Age-standardized	Pancreatitis	Rate	1992	11.6918	16.6632	7.61294
Incidence	United States of America	Both	Age-standardized	Pancreatitis	Rate	2021	11.2035	13.9877	8.69577
Incidence	Chile	Male	Age-standardized	Pancreatitis	Rate	1992	4.44077	6.23554	3.01896
Incidence	Chile	Male	Age-standardized	Pancreatitis	Rate	2021	6.71128	9.3331	4.61262
Incidence	Chile	Female	Age-standardized	Pancreatitis	Rate	1992	8.51661	11.218	6.29773
Incidence	Chile	Female	Age-standardized	Pancreatitis	Rate	2021	14.616	20.1275	9.99095
Incidence	Chile	Both	Age-standardized	Pancreatitis	Rate	1992	6.4723	8.66997	4.70446
Incidence	Chile	Both	Age-standardized	Pancreatitis	Rate	2021	10.5597	14.5254	7.24407
Incidence	Mozambique	Male	Age-standardized	Pancreatitis	Rate	1992	5.24071	8.47201	2.94888
Incidence	Mozambique	Male	Age-standardized	Pancreatitis	Rate	2021	5.19936	8.4061	2.91538
Incidence	Mozambique	Female	Age-standardized	Pancreatitis	Rate	1992	5.60055	8.98522	3.16763
Incidence	Mozambique	Female	Age-standardized	Pancreatitis	Rate	2021	5.78271	9.38473	3.30588
Incidence	Mozambique	Both	Age-standardized	Pancreatitis	Rate	1992	5.4311	8.76438	3.07218
Incidence	Mozambique	Both	Age-standardized	Pancreatitis	Rate	2021	5.50227	8.90216	3.139
Incidence	Central African Republic	Male	Age-standardized	Pancreatitis	Rate	1992	5.32395	8.51962	3.02409
Incidence	Central African Republic	Male	Age-standardized	Pancreatitis	Rate	2021	5.15019	8.32926	2.89028
Incidence	Central African Republic	Female	Age-standardized	Pancreatitis	Rate	1992	6.06927	9.80371	3.50728
Incidence	Central African Republic	Female	Age-standardized	Pancreatitis	Rate	2021	5.88054	9.62003	3.27213
Incidence	Central African Republic	Both	Age-standardized	Pancreatitis	Rate	1992	5.69925	9.16659	3.28745
Incidence	Central African Republic	Both	Age-standardized	Pancreatitis	Rate	2021	5.52001	8.98705	3.08673
Incidence	Monaco	Male	Age-standardized	Pancreatitis	Rate	1992	5.07349	8.29719	2.78885
Incidence	Monaco	Male	Age-standardized	Pancreatitis	Rate	2021	5.00054	8.207	2.76476
Incidence	Monaco	Female	Age-standardized	Pancreatitis	Rate	1992	6.53537	10.5554	3.62645
Incidence	Monaco	Female	Age-standardized	Pancreatitis	Rate	2021	6.37225	10.3467	3.47934
Incidence	Monaco	Both	Age-standardized	Pancreatitis	Rate	1992	5.77808	9.3209	3.19734
Incidence	Monaco	Both	Age-standardized	Pancreatitis	Rate	2021	5.67412	9.20846	3.14117
Incidence	Libya	Male	Age-standardized	Pancreatitis	Rate	1992	8.13902	12.6203	4.85977
Incidence	Libya	Male	Age-standardized	Pancreatitis	Rate	2021	8.01773	12.2961	4.787
Incidence	Libya	Female	Age-standardized	Pancreatitis	Rate	1992	6.79828	10.6495	3.99761
Incidence	Libya	Female	Age-standardized	Pancreatitis	Rate	2021	6.70406	10.5305	3.80377
Incidence	Libya	Both	Age-standardized	Pancreatitis	Rate	1992	7.47014	11.5633	4.42079
Incidence	Libya	Both	Age-standardized	Pancreatitis	Rate	2021	7.37313	11.3777	4.34635
Incidence	Cabo Verde	Male	Age-standardized	Pancreatitis	Rate	1992	5.80859	9.44618	3.25766
Incidence	Cabo Verde	Male	Age-standardized	Pancreatitis	Rate	2021	5.85953	9.48342	3.28209
Incidence	Cabo Verde	Female	Age-standardized	Pancreatitis	Rate	1992	6.54921	10.5373	3.70042
Incidence	Cabo Verde	Female	Age-standardized	Pancreatitis	Rate	2021	6.72585	10.8331	3.80305
Incidence	Cabo Verde	Both	Age-standardized	Pancreatitis	Rate	1992	6.18023	9.91654	3.50933
Incidence	Cabo Verde	Both	Age-standardized	Pancreatitis	Rate	2021	6.2868	10.127	3.5785
Incidence	Australia	Male	Age-standardized	Pancreatitis	Rate	1992	6.693	10.7691	3.84361
Incidence	Australia	Male	Age-standardized	Pancreatitis	Rate	2021	6.17422	9.88872	3.54739
Incidence	Australia	Female	Age-standardized	Pancreatitis	Rate	1992	11.5802	18.2977	6.80653
Incidence	Australia	Female	Age-standardized	Pancreatitis	Rate	2021	10.6807	16.8878	6.24636
Incidence	Australia	Both	Age-standardized	Pancreatitis	Rate	1992	9.09512	14.4407	5.36567
Incidence	Australia	Both	Age-standardized	Pancreatitis	Rate	2021	8.36953	13.2788	4.90854
Incidence	Mongolia	Male	Age-standardized	Pancreatitis	Rate	1992	13.3618	20.4312	8.21386
Incidence	Mongolia	Male	Age-standardized	Pancreatitis	Rate	2021	14.0012	21.2604	8.58609
Incidence	Mongolia	Female	Age-standardized	Pancreatitis	Rate	1992	11.4516	17.2698	6.98973
Incidence	Mongolia	Female	Age-standardized	Pancreatitis	Rate	2021	11.8737	17.924	7.27777
Incidence	Mongolia	Both	Age-standardized	Pancreatitis	Rate	1992	12.4104	18.851	7.61967
Incidence	Mongolia	Both	Age-standardized	Pancreatitis	Rate	2021	12.9498	19.4731	7.96568
Incidence	Nauru	Male	Age-standardized	Pancreatitis	Rate	1992	5.16757	8.36578	2.90349
Incidence	Nauru	Male	Age-standardized	Pancreatitis	Rate	2021	5.14869	8.37045	2.91643
Incidence	Nauru	Female	Age-standardized	Pancreatitis	Rate	1992	5.44512	8.86296	2.97782
Incidence	Nauru	Female	Age-standardized	Pancreatitis	Rate	2021	5.43317	8.8562	2.99284
Incidence	Nauru	Both	Age-standardized	Pancreatitis	Rate	1992	5.30074	8.64525	2.94355
Incidence	Nauru	Both	Age-standardized	Pancreatitis	Rate	2021	5.28299	8.5876	2.96923
Incidence	Bahrain	Male	Age-standardized	Pancreatitis	Rate	1992	9.30114	14.2678	5.62578
Incidence	Bahrain	Male	Age-standardized	Pancreatitis	Rate	2021	8.38275	12.9866	4.96978
Incidence	Bahrain	Female	Age-standardized	Pancreatitis	Rate	1992	7.80582	12.2363	4.58713
Incidence	Bahrain	Female	Age-standardized	Pancreatitis	Rate	2021	7.17155	11.3221	4.14075
Incidence	Bahrain	Both	Age-standardized	Pancreatitis	Rate	1992	8.59411	13.3888	5.15118
Incidence	Bahrain	Both	Age-standardized	Pancreatitis	Rate	2021	7.87251	12.366	4.64091
Incidence	Cambodia	Male	Age-standardized	Pancreatitis	Rate	1992	5.39198	8.65626	3.02033
Incidence	Cambodia	Male	Age-standardized	Pancreatitis	Rate	2021	5.35736	8.631	3.01002
Incidence	Cambodia	Female	Age-standardized	Pancreatitis	Rate	1992	5.79326	9.45526	3.22147
Incidence	Cambodia	Female	Age-standardized	Pancreatitis	Rate	2021	5.83009	9.46423	3.28156
Incidence	Cambodia	Both	Age-standardized	Pancreatitis	Rate	1992	5.57997	9.06541	3.14422
Incidence	Cambodia	Both	Age-standardized	Pancreatitis	Rate	2021	5.58584	8.97573	3.14244
Incidence	Congo	Male	Age-standardized	Pancreatitis	Rate	1992	5.23828	8.47096	2.95254
Incidence	Congo	Male	Age-standardized	Pancreatitis	Rate	2021	5.17593	8.33077	2.92425
Incidence	Congo	Female	Age-standardized	Pancreatitis	Rate	1992	5.93152	9.57084	3.36072
Incidence	Congo	Female	Age-standardized	Pancreatitis	Rate	2021	5.83035	9.39063	3.26184
Incidence	Congo	Both	Age-standardized	Pancreatitis	Rate	1992	5.58802	9.0163	3.19127
Incidence	Congo	Both	Age-standardized	Pancreatitis	Rate	2021	5.50502	8.84099	3.13968
Incidence	Belarus	Male	Age-standardized	Pancreatitis	Rate	1992	18.4574	29.9411	11.12
Incidence	Belarus	Male	Age-standardized	Pancreatitis	Rate	2021	18.7489	29.7557	11.396
Incidence	Belarus	Female	Age-standardized	Pancreatitis	Rate	1992	14.706	21.8573	9.06925
Incidence	Belarus	Female	Age-standardized	Pancreatitis	Rate	2021	15.3363	22.8864	9.54653
Incidence	Belarus	Both	Age-standardized	Pancreatitis	Rate	1992	16.5624	25.4229	10.2267
Incidence	Belarus	Both	Age-standardized	Pancreatitis	Rate	2021	17.0947	25.8494	10.68
Incidence	Marshall Islands	Male	Age-standardized	Pancreatitis	Rate	1992	5.3418	8.61846	2.99091
Incidence	Marshall Islands	Male	Age-standardized	Pancreatitis	Rate	2021	5.30356	8.62073	2.96158
Incidence	Marshall Islands	Female	Age-standardized	Pancreatitis	Rate	1992	5.68997	9.28039	3.19318
Incidence	Marshall Islands	Female	Age-standardized	Pancreatitis	Rate	2021	5.6118	9.07452	3.16115
Incidence	Marshall Islands	Both	Age-standardized	Pancreatitis	Rate	1992	5.50905	8.96667	3.10357
Incidence	Marshall Islands	Both	Age-standardized	Pancreatitis	Rate	2021	5.45379	8.7614	3.07868
Incidence	Turkey	Male	Age-standardized	Pancreatitis	Rate	1992	5.88582	8.77435	3.56942
Incidence	Turkey	Male	Age-standardized	Pancreatitis	Rate	2021	4.8533	7.37128	2.91062
Incidence	Turkey	Female	Age-standardized	Pancreatitis	Rate	1992	7.18744	11.0932	4.40812
Incidence	Turkey	Female	Age-standardized	Pancreatitis	Rate	2021	5.87162	9.07987	3.59441
Incidence	Turkey	Both	Age-standardized	Pancreatitis	Rate	1992	6.52213	9.7897	3.97585
Incidence	Turkey	Both	Age-standardized	Pancreatitis	Rate	2021	5.34968	7.99096	3.28396
Incidence	India	Male	Age-standardized	Pancreatitis	Rate	1992	11.6782	18.1708	7.06731
Incidence	India	Male	Age-standardized	Pancreatitis	Rate	2021	15.2941	23.8568	9.27561
Incidence	India	Female	Age-standardized	Pancreatitis	Rate	1992	10.9801	16.9792	6.61389
Incidence	India	Female	Age-standardized	Pancreatitis	Rate	2021	15.4084	23.5761	9.27218
Incidence	India	Both	Age-standardized	Pancreatitis	Rate	1992	11.3393	17.586	6.8473
Incidence	India	Both	Age-standardized	Pancreatitis	Rate	2021	15.3462	23.7466	9.31302
Incidence	Ecuador	Male	Age-standardized	Pancreatitis	Rate	1992	8.30947	11.3335	5.78403
Incidence	Ecuador	Male	Age-standardized	Pancreatitis	Rate	2021	8.11647	10.1763	6.36086
Incidence	Ecuador	Female	Age-standardized	Pancreatitis	Rate	1992	12.0672	16.3191	8.56915
Incidence	Ecuador	Female	Age-standardized	Pancreatitis	Rate	2021	15.5746	18.5675	12.9438
Incidence	Ecuador	Both	Age-standardized	Pancreatitis	Rate	1992	10.2096	13.8401	7.16485
Incidence	Ecuador	Both	Age-standardized	Pancreatitis	Rate	2021	11.8017	14.1451	9.72122
Incidence	Benin	Male	Age-standardized	Pancreatitis	Rate	1992	5.75951	9.29956	3.24955
Incidence	Benin	Male	Age-standardized	Pancreatitis	Rate	2021	5.88257	9.53193	3.32152
Incidence	Benin	Female	Age-standardized	Pancreatitis	Rate	1992	6.32412	10.1308	3.62023
Incidence	Benin	Female	Age-standardized	Pancreatitis	Rate	2021	6.50312	10.6078	3.69865
Incidence	Benin	Both	Age-standardized	Pancreatitis	Rate	1992	6.04965	9.69396	3.42457
Incidence	Benin	Both	Age-standardized	Pancreatitis	Rate	2021	6.19752	10.0347	3.53493
Incidence	Burundi	Male	Age-standardized	Pancreatitis	Rate	1992	5.42285	8.66808	3.07019
Incidence	Burundi	Male	Age-standardized	Pancreatitis	Rate	2021	5.21732	8.50613	2.90632
Incidence	Burundi	Female	Age-standardized	Pancreatitis	Rate	1992	5.75216	9.26888	3.25419
Incidence	Burundi	Female	Age-standardized	Pancreatitis	Rate	2021	5.80816	9.41632	3.29944
Incidence	Burundi	Both	Age-standardized	Pancreatitis	Rate	1992	5.59063	8.90871	3.20836
Incidence	Burundi	Both	Age-standardized	Pancreatitis	Rate	2021	5.51958	8.95021	3.12993
Incidence	Barbados	Male	Age-standardized	Pancreatitis	Rate	1992	7.41053	11.7123	4.26209
Incidence	Barbados	Male	Age-standardized	Pancreatitis	Rate	2021	7.23963	11.3989	4.21516
Incidence	Barbados	Female	Age-standardized	Pancreatitis	Rate	1992	9.98159	15.6968	5.87265
Incidence	Barbados	Female	Age-standardized	Pancreatitis	Rate	2021	9.77065	15.4096	5.80952
Incidence	Barbados	Both	Age-standardized	Pancreatitis	Rate	1992	8.67771	13.6632	5.07149
Incidence	Barbados	Both	Age-standardized	Pancreatitis	Rate	2021	8.47494	13.3224	5.00104
Incidence	Albania	Male	Age-standardized	Pancreatitis	Rate	1992	7.94284	12.4278	4.69646
Incidence	Albania	Male	Age-standardized	Pancreatitis	Rate	2021	7.82354	12.1071	4.61291
Incidence	Albania	Female	Age-standardized	Pancreatitis	Rate	1992	7.33883	11.6686	4.23048
Incidence	Albania	Female	Age-standardized	Pancreatitis	Rate	2021	7.12228	11.3542	4.09026
Incidence	Albania	Both	Age-standardized	Pancreatitis	Rate	1992	7.62943	11.9948	4.45062
Incidence	Albania	Both	Age-standardized	Pancreatitis	Rate	2021	7.49269	11.7315	4.40236
Incidence	Guinea-Bissau	Male	Age-standardized	Pancreatitis	Rate	1992	6.07535	9.70155	3.45024
Incidence	Guinea-Bissau	Male	Age-standardized	Pancreatitis	Rate	2021	5.83108	9.37313	3.3305
Incidence	Guinea-Bissau	Female	Age-standardized	Pancreatitis	Rate	1992	6.67796	10.6916	3.83809
Incidence	Guinea-Bissau	Female	Age-standardized	Pancreatitis	Rate	2021	6.45222	10.2795	3.67277
Incidence	Guinea-Bissau	Both	Age-standardized	Pancreatitis	Rate	1992	6.38267	10.2269	3.68993
Incidence	Guinea-Bissau	Both	Age-standardized	Pancreatitis	Rate	2021	6.14243	9.80436	3.50981
Incidence	Belize	Male	Age-standardized	Pancreatitis	Rate	1992	6.79832	10.9147	3.92379
Incidence	Belize	Male	Age-standardized	Pancreatitis	Rate	2021	6.89471	10.9949	3.96115
Incidence	Belize	Female	Age-standardized	Pancreatitis	Rate	1992	9.09007	14.3416	5.38852
Incidence	Belize	Female	Age-standardized	Pancreatitis	Rate	2021	9.44243	14.8455	5.61967
Incidence	Belize	Both	Age-standardized	Pancreatitis	Rate	1992	7.93632	12.4915	4.66331
Incidence	Belize	Both	Age-standardized	Pancreatitis	Rate	2021	8.16507	12.7823	4.79505
Incidence	Belgium	Male	Age-standardized	Pancreatitis	Rate	1992	5.35425	8.79511	3.04552
Incidence	Belgium	Male	Age-standardized	Pancreatitis	Rate	2021	4.7601	7.93547	2.61135
Incidence	Belgium	Female	Age-standardized	Pancreatitis	Rate	1992	8.70234	13.2173	5.30545
Incidence	Belgium	Female	Age-standardized	Pancreatitis	Rate	2021	8.10815	12.2076	5.02698
Incidence	Belgium	Both	Age-standardized	Pancreatitis	Rate	1992	6.99166	10.9306	4.18542
Incidence	Belgium	Both	Age-standardized	Pancreatitis	Rate	2021	6.39952	9.9486	3.85759
Incidence	Norway	Male	Age-standardized	Pancreatitis	Rate	1992	9.61528	14.5227	6.01857
Incidence	Norway	Male	Age-standardized	Pancreatitis	Rate	2021	9.30058	13.8924	5.88945
Incidence	Norway	Female	Age-standardized	Pancreatitis	Rate	1992	6.93018	10.6847	4.2297
Incidence	Norway	Female	Age-standardized	Pancreatitis	Rate	2021	6.34429	9.67705	3.88803
Incidence	Norway	Both	Age-standardized	Pancreatitis	Rate	1992	8.30344	12.6244	5.12736
Incidence	Norway	Both	Age-standardized	Pancreatitis	Rate	2021	7.8683	11.8415	4.94908
Incidence	Kuwait	Male	Age-standardized	Pancreatitis	Rate	1992	8.2364	12.8254	4.86197
Incidence	Kuwait	Male	Age-standardized	Pancreatitis	Rate	2021	8.02875	12.397	4.80393
Incidence	Kuwait	Female	Age-standardized	Pancreatitis	Rate	1992	7.09469	11.2786	4.09877
Incidence	Kuwait	Female	Age-standardized	Pancreatitis	Rate	2021	6.96242	11.0228	3.97986
Incidence	Kuwait	Both	Age-standardized	Pancreatitis	Rate	1992	7.67806	11.9611	4.48401
Incidence	Kuwait	Both	Age-standardized	Pancreatitis	Rate	2021	7.50988	11.6765	4.4278
Incidence	United Republic of Tanzania	Male	Age-standardized	Pancreatitis	Rate	1992	5.17171	8.31237	2.91852
Incidence	United Republic of Tanzania	Male	Age-standardized	Pancreatitis	Rate	2021	5.10611	8.21438	2.89568
Incidence	United Republic of Tanzania	Female	Age-standardized	Pancreatitis	Rate	1992	5.47516	8.89864	3.08627
Incidence	United Republic of Tanzania	Female	Age-standardized	Pancreatitis	Rate	2021	5.67754	9.35784	3.18771
Incidence	United Republic of Tanzania	Both	Age-standardized	Pancreatitis	Rate	1992	5.32781	8.61192	3.00387
Incidence	United Republic of Tanzania	Both	Age-standardized	Pancreatitis	Rate	2021	5.39897	8.75618	3.08004
Incidence	Cuba	Male	Age-standardized	Pancreatitis	Rate	1992	7.30849	11.5956	4.22167
Incidence	Cuba	Male	Age-standardized	Pancreatitis	Rate	2021	7.4929	11.8311	4.29265
Incidence	Cuba	Female	Age-standardized	Pancreatitis	Rate	1992	9.92241	15.5264	5.92235
Incidence	Cuba	Female	Age-standardized	Pancreatitis	Rate	2021	10.2653	16.047	6.0485
Incidence	Cuba	Both	Age-standardized	Pancreatitis	Rate	1992	8.57996	13.4753	5.06577
Incidence	Cuba	Both	Age-standardized	Pancreatitis	Rate	2021	8.83382	13.77	5.19521
Incidence	Peru	Male	Age-standardized	Pancreatitis	Rate	1992	9.05751	14.38	5.24868
Incidence	Peru	Male	Age-standardized	Pancreatitis	Rate	2021	8.07154	13.024	4.62331
Incidence	Peru	Female	Age-standardized	Pancreatitis	Rate	1992	14.279	22.3672	8.49158
Incidence	Peru	Female	Age-standardized	Pancreatitis	Rate	2021	12.6787	20.09	7.516
Incidence	Peru	Both	Age-standardized	Pancreatitis	Rate	1992	11.6825	18.4121	6.88521
Incidence	Peru	Both	Age-standardized	Pancreatitis	Rate	2021	10.2703	16.3502	6.02217
Incidence	Botswana	Male	Age-standardized	Pancreatitis	Rate	1992	5.32573	8.6147	2.99869
Incidence	Botswana	Male	Age-standardized	Pancreatitis	Rate	2021	5.02542	8.14972	2.77292
Incidence	Botswana	Female	Age-standardized	Pancreatitis	Rate	1992	6.04537	9.78135	3.40876
Incidence	Botswana	Female	Age-standardized	Pancreatitis	Rate	2021	5.72464	9.3466	3.22538
Incidence	Botswana	Both	Age-standardized	Pancreatitis	Rate	1992	5.69723	9.15789	3.22721
Incidence	Botswana	Both	Age-standardized	Pancreatitis	Rate	2021	5.37287	8.71365	3.01972
Incidence	Sudan	Male	Age-standardized	Pancreatitis	Rate	1992	8.1891	12.4887	4.91254
Incidence	Sudan	Male	Age-standardized	Pancreatitis	Rate	2021	7.63287	11.748	4.51796
Incidence	Sudan	Female	Age-standardized	Pancreatitis	Rate	1992	6.47861	10.2205	3.80966
Incidence	Sudan	Female	Age-standardized	Pancreatitis	Rate	2021	6.24984	9.97424	3.57847
Incidence	Sudan	Both	Age-standardized	Pancreatitis	Rate	1992	7.33381	11.3218	4.38231
Incidence	Sudan	Both	Age-standardized	Pancreatitis	Rate	2021	6.9623	10.8947	4.10457
Incidence	Egypt	Male	Age-standardized	Pancreatitis	Rate	1992	7.82603	12.1382	4.69299
Incidence	Egypt	Male	Age-standardized	Pancreatitis	Rate	2021	7.86937	12.1581	4.69889
Incidence	Egypt	Female	Age-standardized	Pancreatitis	Rate	1992	6.39611	10.13	3.72405
Incidence	Egypt	Female	Age-standardized	Pancreatitis	Rate	2021	6.4982	10.2626	3.66801
Incidence	Egypt	Both	Age-standardized	Pancreatitis	Rate	1992	7.13335	11.1529	4.2246
Incidence	Egypt	Both	Age-standardized	Pancreatitis	Rate	2021	7.20673	11.2118	4.2496
Incidence	Guinea	Male	Age-standardized	Pancreatitis	Rate	1992	5.68185	9.17352	3.19356
Incidence	Guinea	Male	Age-standardized	Pancreatitis	Rate	2021	5.60149	9.11224	3.12806
Incidence	Guinea	Female	Age-standardized	Pancreatitis	Rate	1992	6.14415	9.87331	3.49877
Incidence	Guinea	Female	Age-standardized	Pancreatitis	Rate	2021	6.15052	10.0027	3.41639
Incidence	Guinea	Both	Age-standardized	Pancreatitis	Rate	1992	5.91729	9.55072	3.35804
Incidence	Guinea	Both	Age-standardized	Pancreatitis	Rate	2021	5.88168	9.54918	3.28271
Incidence	Chad	Male	Age-standardized	Pancreatitis	Rate	1992	5.85171	9.453	3.31245
Incidence	Chad	Male	Age-standardized	Pancreatitis	Rate	2021	5.87542	9.5573	3.28127
Incidence	Chad	Female	Age-standardized	Pancreatitis	Rate	1992	6.41886	10.3274	3.62465
Incidence	Chad	Female	Age-standardized	Pancreatitis	Rate	2021	6.42811	10.325	3.63547
Incidence	Chad	Both	Age-standardized	Pancreatitis	Rate	1992	6.14308	9.89515	3.4784
Incidence	Chad	Both	Age-standardized	Pancreatitis	Rate	2021	6.15502	9.92413	3.49252
Incidence	Saint Kitts and Nevis	Male	Age-standardized	Pancreatitis	Rate	1992	7.1286	11.419	4.14455
Incidence	Saint Kitts and Nevis	Male	Age-standardized	Pancreatitis	Rate	2021	6.88166	11.062	4.00075
Incidence	Saint Kitts and Nevis	Female	Age-standardized	Pancreatitis	Rate	1992	9.69788	15.2504	5.74996
Incidence	Saint Kitts and Nevis	Female	Age-standardized	Pancreatitis	Rate	2021	9.53836	14.8912	5.53943
Incidence	Saint Kitts and Nevis	Both	Age-standardized	Pancreatitis	Rate	1992	8.40527	13.312	4.93897
Incidence	Saint Kitts and Nevis	Both	Age-standardized	Pancreatitis	Rate	2021	8.2026	12.9195	4.79558
[truncated: 5,382 more rows]
